# Supplementary material for: Lysosomal TMEM9-LAMTOR4-controlled mTOR signaling integrity is required for mammary tumorigenesis
Source: Research Square preprint supplement (doi:10.21203/rs.3.rs-1546520/v1), 2022-05-11
Supplement: Supplementary file 1 [file c785ee1fafdfc0690d836193.xlsx]

## Sheet: Summary
	Supplementary Tables
	Supplementary Table 1. TMEM9 sequencing data from TCGA
	Supplementary Table 2. TMEM9 RNAseq data from CCLE
	Supplementary Table 3. LysoIP-MS identified proteins list
	Supplementary Table 4. Top 20 proteins identified by LysoIP-MS
	Supplementary Table 5. BRCA cells RNAseq data
	Supplementary Table 6. Antibody information

## Sheet: Table S1
Supplementary Table 1. TMEM9 sequencing data from TCGA
Sample Id	TMEM9: Putative copy-number alterations from GISTIC	TMEM9: mRNA expression z-scores relative to all samples (log RNA Seq V2 RSEM)
TCGA-OR-A5LE-01	Amplification	2.9958
TCGA-BL-A0C8-01	Amplification	1.0356
TCGA-BT-A3PK-01	Amplification	2.7262
TCGA-DK-AA75-01	Amplification	3.28
TCGA-FD-A3SL-01	Amplification	1.4908
TCGA-FD-A3SP-01	Amplification	0.9111
TCGA-ZF-AA51-01	Amplification	2.2638
TCGA-A1-A0SH-01	Amplification	0.3221
TCGA-A2-A25D-01	Amplification	1.7858
TCGA-A7-A0CG-01	Amplification	0.7643
TCGA-A8-A06R-01	Amplification	0.8463
TCGA-A8-A06Y-01	Amplification	1.9003
TCGA-A8-A07F-01	Amplification	-0.0099
TCGA-A8-A07G-01	Amplification	1.1314
TCGA-A8-A07I-01	Amplification	-0.1039
TCGA-A8-A07L-01	Amplification	1.2384
TCGA-A8-A08J-01	Amplification	2.5423
TCGA-A8-A099-01	Amplification	0.4751
TCGA-A8-A09B-01	Amplification	0.6109
TCGA-A8-A09C-01	Amplification	0.6329
TCGA-A8-A0AB-01	Amplification	1.1282
TCGA-AC-A2BK-01	Amplification	0.1098
TCGA-AC-A3EH-01	Amplification	1.5666
TCGA-AN-A03X-01	Amplification	1.1781
TCGA-AN-A046-01	Amplification	0.3058
TCGA-AN-A0AT-01	Amplification	0.8562
TCGA-AN-A0FF-01	Amplification	1.1816
TCGA-AN-A0FK-01	Amplification	0.8735
TCGA-AN-A0FN-01	Amplification	-0.8182
TCGA-AN-A0FT-01	Amplification	2.3984
TCGA-AN-A0XP-01	Amplification	0.5749
TCGA-AN-A0XW-01	Amplification	0.3918
TCGA-AO-A0J2-01	Amplification	2.3597
TCGA-AO-A12A-01	Amplification	0.5022
TCGA-AO-A12D-01	Amplification	1.5358
TCGA-AR-A0TW-01	Amplification	1.5563
TCGA-AR-A1AH-01	Amplification	0.0211
TCGA-AR-A1AM-01	Amplification	1.1939
TCGA-AR-A24H-01	Amplification	0.8733
TCGA-AR-A24T-01	Amplification	-0.4455
TCGA-AR-A5QN-01	Amplification	0.9209
TCGA-AR-A5QP-01	Amplification	1.102
TCGA-B6-A0I9-01	Amplification	0.6291
TCGA-B6-A0RP-01	Amplification	0.3845
TCGA-B6-A0RS-01	Amplification	2.1672
TCGA-B6-A0WX-01	Amplification	1.4252
TCGA-B6-A1KI-01	Amplification	-0.1695
TCGA-B6-A40B-01	Amplification	0.5143
TCGA-BH-A0B5-01	Amplification	-0.2069
TCGA-BH-A0BA-01	Amplification	-0.8512
TCGA-BH-A0BV-01	Amplification	0.7215
TCGA-BH-A0C1-01	Amplification	-0.4494
TCGA-BH-A0E9-01	Amplification	0.1441
TCGA-BH-A0GZ-01	Amplification	0.9752
TCGA-BH-A18F-01	Amplification	-0.1239
TCGA-BH-A18P-01	Amplification	-0.1024
TCGA-BH-A1EV-01	Amplification	-0.1813
TCGA-BH-A28O-01	Amplification	-0.5659
TCGA-BH-A28Q-01	Amplification	0.1931
TCGA-BH-A42T-01	Amplification	1.6691
TCGA-BH-A8FY-01	Amplification	1.3578
TCGA-C8-A12L-01	Amplification	-0.8411
TCGA-C8-A1HL-01	Amplification	0.4443
TCGA-C8-A26Z-01	Amplification	0.3651
TCGA-C8-A3M7-01	Amplification	-0.3678
TCGA-C8-A8HQ-01	Amplification	-0.0669
TCGA-D8-A1JP-01	Amplification	1.6933
TCGA-D8-A1X5-01	Amplification	1.2058
TCGA-D8-A1XG-01	Amplification	-0.4412
TCGA-D8-A27I-01	Amplification	-0.5739
TCGA-E2-A10A-01	Amplification	0.6553
TCGA-E2-A14R-01	Amplification	0.6943
TCGA-E2-A15M-01	Amplification	-0.9315
TCGA-E9-A1NI-01	Amplification	1.6367
TCGA-E9-A22E-01	Amplification	1.4624
TCGA-E9-A249-01	Amplification	-0.0169
TCGA-EW-A1J3-01	Amplification	-0.1151
TCGA-EW-A1P3-01	Amplification	0.6605
TCGA-EW-A1PE-01	Amplification	0.2371
TCGA-EW-A6S9-01	Amplification	-0.1742
TCGA-JL-A3YX-01	Amplification	1.0377
TCGA-LL-A5YM-01	Amplification	3.05
TCGA-LL-A6FP-01	Amplification	2.9375
TCGA-OL-A66K-01	Amplification	1.0075
TCGA-OL-A66N-01	Amplification	1.6422
TCGA-S3-A6ZG-01	Amplification	-0.027
TCGA-WT-AB44-01	Amplification	1.2148
TCGA-EK-A2PM-01	Amplification	1.4803
TCGA-ZJ-AAXN-01	Amplification	0.2742
TCGA-AA-A01X-01	Amplification	1.7904
TCGA-AH-6643-01	Amplification	1.3423
TCGA-D5-6536-01	Amplification	2.4607
TCGA-W5-AA2W-01	Amplification	0.6258
TCGA-WD-A7RX-01	Amplification	0.5454
TCGA-LN-A7HY-01	Amplification	3.0883
TCGA-BA-6871-01	Amplification	2.1126
TCGA-CV-7418-01	Amplification	1.4557
TCGA-HT-7603-01	Amplification	2.3083
TCGA-BC-A10Y-01	Amplification	-0.0229
TCGA-BW-A5NP-01	Amplification	0.3342
TCGA-CC-5261-01	Amplification	-0.2487
TCGA-CC-A3M9-01	Amplification	0.7957
TCGA-CC-A8HV-01	Amplification	0.8431
TCGA-DD-A11C-01	Amplification	-0.0236
TCGA-DD-A3A9-01	Amplification	-0.946
TCGA-DD-A4NB-01	Amplification	0.9068
TCGA-DD-A4NH-01	Amplification	1.7054
TCGA-DD-A73F-01	Amplification	-0.5121
TCGA-DD-A73G-01	Amplification	1.6557
TCGA-DD-AACH-01	Amplification	0.8734
TCGA-DD-AACN-01	Amplification	0.467
TCGA-DD-AADA-01	Amplification	1.0901
TCGA-DD-AADW-01	Amplification	0.4015
TCGA-DD-AADY-01	Amplification	1.3863
TCGA-DD-AAVQ-01	Amplification	1.1608
TCGA-ED-A7PY-01	Amplification	0.5394
TCGA-FV-A496-01	Amplification	0.1877
TCGA-G3-A25X-01	Amplification	2.3449
TCGA-G3-A5SM-01	Amplification	-0.6635
TCGA-UB-A7MC-01	Amplification	-0.6446
TCGA-ZP-A9D1-01	Amplification	-0.5796
TCGA-ZS-A9CE-01	Amplification	1.0878
TCGA-05-4249-01	Amplification	0.6429
TCGA-05-5715-01	Amplification	0.2963
TCGA-49-4506-01	Amplification	-2.2719
TCGA-50-5935-01	Amplification	1.4681
TCGA-55-6968-01	Amplification	-0.215
TCGA-55-6972-01	Amplification	2.4479
TCGA-55-7283-01	Amplification	0.3445
TCGA-55-7903-01	Amplification	0.2438
TCGA-55-7907-01	Amplification	0.7359
TCGA-55-8087-01	Amplification	0.7584
TCGA-55-8203-01	Amplification	-0.0683
TCGA-73-4677-01	Amplification	2.5714
TCGA-78-7149-01	Amplification	2.0357
TCGA-78-7160-01	Amplification	-0.3518
TCGA-78-7161-01	Amplification	2.4134
TCGA-86-6562-01	Amplification	0.2576
TCGA-91-6848-01	Amplification	-1.1428
TCGA-MP-A4T7-01	Amplification	-0.0588
TCGA-22-5479-01	Amplification	0.2366
TCGA-37-3783-01	Amplification	2.7829
TCGA-43-2581-01	Amplification	0.9559
TCGA-85-7696-01	Amplification	0.611
TCGA-NC-A5HP-01	Amplification	-0.3105
TCGA-ZN-A9VW-01	Amplification	0.4972
TCGA-09-1673-01	Amplification	0.9899
TCGA-24-1423-01	Amplification	0.4732
TCGA-24-1428-01	Amplification	2.0495
TCGA-24-1567-01	Amplification	1.7435
TCGA-24-1924-01	Amplification	2.3041
TCGA-24-2023-01	Amplification	0.7479
TCGA-25-1316-01	Amplification	0.6396
TCGA-59-2348-01	Amplification	1.3676
TCGA-2L-AAQA-01	Amplification	0.9639
TCGA-FB-AAQ6-01	Amplification	1.8045
TCGA-HV-A7OP-01	Amplification	3.2625
TCGA-QR-A70D-01	Amplification	0.9472
TCGA-S7-A7WM-01	Amplification	0.2662
TCGA-WB-A81G-01	Amplification	1.0712
TCGA-XJ-A9DX-01	Amplification	2.1814
TCGA-DX-A3LY-01	Amplification	0.9511
TCGA-IW-A3M6-01	Amplification	2.1589
TCGA-SG-A6Z4-01	Amplification	0.342
TCGA-D3-A2JO-06	Amplification	-0.9035
TCGA-EB-A44R-06	Amplification	1.2193
TCGA-EE-A182-06	Amplification	2.934
TCGA-EE-A2GL-06	Amplification	-0.5176
TCGA-EE-A2GM-06	Amplification	1.21
TCGA-EE-A2ML-06	Amplification	0.2338
TCGA-ER-A3ES-06	Amplification	0.1686
TCGA-FS-A1ZC-06	Amplification	-0.2133
TCGA-FS-A1ZU-06	Amplification	1.7394
TCGA-GN-A26A-06	Amplification	0.81
TCGA-QB-A6FS-06	Amplification	1.9539
TCGA-YD-A89C-06	Amplification	1.5141
TCGA-BR-8289-01	Amplification	1.2368
TCGA-CD-8528-01	Amplification	-2.0577
TCGA-D7-6527-01	Amplification	3.3165
TCGA-IM-A3U2-01	Amplification	0.942
TCGA-XU-A936-01	Amplification	0.7122
TCGA-YT-A95G-01	Amplification	-0.0996
TCGA-A5-A0GN-01	Amplification	-0.0058
TCGA-AJ-A3EJ-01	Amplification	0.3616
TCGA-AP-A052-01	Amplification	0.4066
TCGA-AP-A0LI-01	Amplification	1.0376
TCGA-AX-A1C9-01	Amplification	-0.6701
TCGA-AX-A3G4-01	Amplification	1.0979
TCGA-D1-A179-01	Amplification	0.8163
TCGA-D1-A1NX-01	Amplification	0.1793
TCGA-EY-A1GO-01	Amplification	0.7786
TCGA-EY-A1GP-01	Amplification	1.8878
TCGA-EY-A2OO-01	Amplification	0.7967
TCGA-H5-A2HR-01	Amplification	2.2752

## Sheet: Table S2
Supplementary Table 2. TMEM9 RNAseq data from CCLE
Cell lines	TMEM9
DMS53_LUNG	5.78852
SW1116_LARGE_INTESTINE	3.31079
NCIH1694_LUNG	4.19601
P3HR1_HAEMATOPOIETIC_AND_LYMPHOID_TISSUE	2.88604
HUT78_HAEMATOPOIETIC_AND_LYMPHOID_TISSUE	3.05362
UMUC3_URINARY_TRACT	1.81389
HOS_BONE	4.17258
HUNS1_HAEMATOPOIETIC_AND_LYMPHOID_TISSUE	1.42549
AML193_HAEMATOPOIETIC_AND_LYMPHOID_TISSUE	3.75359
RVH421_SKIN	3.78006
NCIH1184_LUNG	5.1643
HCC2157_BREAST	4.84733
TC71_BONE	4.23746
NCIH2227_LUNG	5.10892
COLO205_LARGE_INTESTINE
SNU449_LIVER	5.39069
NCIH28_PLEURA	5.52781
OV56_OVARY	4.81632
JHOS4_OVARY	5.41655
KYSE450_OESOPHAGUS	4.32651
RMUGS_OVARY	4.80082
KLE_ENDOMETRIUM	5.33501
HS895T_SKIN	4.08949
LN229_CENTRAL_NERVOUS_SYSTEM	4.90616
P31FUJ_HAEMATOPOIETIC_AND_LYMPHOID_TISSUE	4.64559
RKN_SOFT_TISSUE	4.79832
PATU8988S_PANCREAS	4.12349
NH6_AUTONOMIC_GANGLIA	4.05457
SF126_CENTRAL_NERVOUS_SYSTEM	4.12834
RERFLCAD2_LUNG	4.20717
OUMS23_LARGE_INTESTINE	5.43887
SNGM_ENDOMETRIUM	5.18224
OUMS27_BONE
PL45_PANCREAS
NCIH2347_LUNG	4.88413
SW1990_PANCREAS	4.17851
HS940T_SKIN	3.87395
HS611T_HAEMATOPOIETIC_AND_LYMPHOID_TISSUE	3.12928
TOLEDO_HAEMATOPOIETIC_AND_LYMPHOID_TISSUE	4.05641
RERFGC1B_STOMACH	5.24393
HT1080_SOFT_TISSUE	3.70187
NCIH2087_LUNG	4.55492
COV318_OVARY	4.79689
NCIH2085_LUNG	4.70291
NCIH510_LUNG	4.89573
CAKI1_KIDNEY	6.10695
NCIH716_LARGE_INTESTINE	3.81793
NCIH2066_LUNG	4.40582
NCIH1341_LUNG	4.61447
NCIH2029_LUNG	4.512
C3A_LIVER
SW480_LARGE_INTESTINE	4.54046
HS746T_STOMACH	4.21403
LU65_LUNG	1.72704
HS739T_BREAST	3.41063
SNUC2A_LARGE_INTESTINE	3.02527
HEC151_ENDOMETRIUM	6.03969
MSTO211H_PLEURA	4.61735
RAJI_HAEMATOPOIETIC_AND_LYMPHOID_TISSUE	2.76719
SKMEL1_SKIN	3.50564
SUPT1_HAEMATOPOIETIC_AND_LYMPHOID_TISSUE	2.75112
JHH7_LIVER	4.54758
HUT102_HAEMATOPOIETIC_AND_LYMPHOID_TISSUE	0.853423
5637_URINARY_TRACT	4.32794
HCC38_BREAST	4.87633
DU4475_BREAST	5.53845
NCIH1573_LUNG	5.30817
NCIH508_LARGE_INTESTINE	4.2715
NCIH1651_LUNG	5.16487
SKUT1_SOFT_TISSUE	4.4977
MDAMB175VII_BREAST	5.2649
SUPB15_HAEMATOPOIETIC_AND_LYMPHOID_TISSUE	3.06307
BECKER_CENTRAL_NERVOUS_SYSTEM
NCIH226_LUNG	4.22049
NCIH1666_LUNG	5.01858
SW1783_CENTRAL_NERVOUS_SYSTEM	5.53999
ISTMES1_PLEURA	4.45373
NCIH1734_LUNG	4.34898
NCIH2342_LUNG	4.36394
EBC1_LUNG	3.67173
YMB1_BREAST
OC316_OVARY
HS936T_SKIN	4.82023
T173_BONE	3.36669
NCIH322_LUNG	3.53353
HS618T_LUNG	3.92638
HS870T_BONE	4.07703
HS706T_BONE	4.10747
PANC1_PANCREAS	3.43867
NCIH2291_LUNG	4.30935
T47D_BREAST	5.63863
HS742T_BREAST	3.76509
BICR56_UPPER_AERODIGESTIVE_TRACT	4.33219
BICR16_UPPER_AERODIGESTIVE_TRACT	4.33016
TE10_OESOPHAGUS	3.73639
SKMEL28_SKIN	4.19144
BICR6_UPPER_AERODIGESTIVE_TRACT	3.97799
BHY_UPPER_AERODIGESTIVE_TRACT	3.96438
AZ521_STOMACH
SH4_SKIN	4.99649
KPL1_BREAST	5.02678
CGTHW1_THYROID
TUHR4TKB_KIDNEY	5.80967
LS123_LARGE_INTESTINE	4.17095
HEL_HAEMATOPOIETIC_AND_LYMPHOID_TISSUE	5.8768
HPAC_PANCREAS	4.28655
RCC10RGB_KIDNEY	5.80178
JHOM1_OVARY	4.56431
SU8686_PANCREAS	4.91669
HCC33_LUNG	5.17339
TE6_OESOPHAGUS	4.74693
JHOC5_OVARY	5.34028
ACCMESO1_PLEURA	4.94275
BL41_HAEMATOPOIETIC_AND_LYMPHOID_TISSUE	1.89579
SNU1214_UPPER_AERODIGESTIVE_TRACT	5.01068
CORL105_LUNG	4.22454
LMSU_STOMACH	5.29642
SNU1197_LARGE_INTESTINE	3.51781
COLO668_LUNG	4.18792
OSRC2_KIDNEY	6.50653
HUH6_LIVER	4.47814
PANC0203_PANCREAS	3.99574
CJM_SKIN	3.53508
BICR22_UPPER_AERODIGESTIVE_TRACT	4.43698
SHSY5Y_AUTONOMIC_GANGLIA
TM31_CENTRAL_NERVOUS_SYSTEM	4.68765
SNU1272_KIDNEY	6.08615
KPNRTBM1_AUTONOMIC_GANGLIA	4.11047
BICR18_UPPER_AERODIGESTIVE_TRACT	4.29544
TE4_OESOPHAGUS	5.18257
PCM6_HAEMATOPOIETIC_AND_LYMPHOID_TISSUE
ECC10_STOMACH	5.35973
TUHR14TKB_KIDNEY	5.46498
YD15_SALIVARY_GLAND	3.85713
UBLC1_URINARY_TRACT	4.95831
ECGI10_OESOPHAGUS	4.90902
CW2_LARGE_INTESTINE	4.94123
SNU761_LIVER	5.1873
SNU61_LARGE_INTESTINE	4.48637
NCIH1915_LUNG	5.30143
SNU324_PANCREAS	5.6735
YD10B_UPPER_AERODIGESTIVE_TRACT	4.3472
HCC2279_LUNG	4.10568
HLC1_LUNG
TUHR10TKB_KIDNEY	5.97935
HEC1B_ENDOMETRIUM	5.13171
VMRCLCP_LUNG
TGBC11TKB_STOMACH	4.01742
OVK18_OVARY	5.40778
SNU1077_ENDOMETRIUM	5.44068
HCC1588_LUNG	4.57581
SNU213_PANCREAS	4.23645
HT115_LARGE_INTESTINE	3.56916
TE14_OESOPHAGUS	4.78922
TE8_OESOPHAGUS	4.66866
SNU520_STOMACH	-0.0885872
JHUEM3_ENDOMETRIUM	5.10684
LI7_LIVER	4.45838
NCIH838_LUNG	5.41338
SNU119_OVARY	4.75345
SNU1033_LARGE_INTESTINE	5.0099
SNUC5_LARGE_INTESTINE	4.32249
GSS_STOMACH	4.52487
TALL1_HAEMATOPOIETIC_AND_LYMPHOID_TISSUE	3.71801
HCC1171_LUNG	4.26381
SNUC4_LARGE_INTESTINE	3.79175
U138MG_CENTRAL_NERVOUS_SYSTEM
SNU620_STOMACH	4.10145
ECC12_STOMACH	4.39905
GSU_STOMACH	3.27247
KMS18_HAEMATOPOIETIC_AND_LYMPHOID_TISSUE	4.64853
JHOM2B_OVARY	4.03649
MDAMB231_BREAST	4.03919
OV90_OVARY	5.62429
RS411_HAEMATOPOIETIC_AND_LYMPHOID_TISSUE	4.33172
OVTOKO_OVARY	5.03213
OVCAR4_OVARY	5.22231
HLF_LIVER	5.21376
HCT15_LARGE_INTESTINE	4.40404
SW1463_LARGE_INTESTINE	4.05051
SF295_CENTRAL_NERVOUS_SYSTEM	4.77185
WM115_SKIN	3.57578
JHH4_LIVER	4.77865
OE33_OESOPHAGUS	3.5315
CCK81_LARGE_INTESTINE	4.01745
JHH1_LIVER	5.56259
SJSA1_BONE	4.22078
NCIH2228_LUNG	3.93899
RERFLCAI_LUNG	4.23637
SKMES1_LUNG	4.73411
NCIH520_LUNG	5.50769
JHH5_LIVER	3.92638
FU97_STOMACH	6.13948
COLO800_SKIN	4.32811
NCIH1963_LUNG	5.09873
RL952_ENDOMETRIUM	5.4927
J82_URINARY_TRACT	4.84194
HCC15_LUNG	3.90865
M059K_CENTRAL_NERVOUS_SYSTEM	4.60236
CALU6_LUNG	4.04388
SKLU1_LUNG	3.2787
SW900_LUNG	4.88699
UACC62_SKIN	4.5622
MFE280_ENDOMETRIUM	5.69053
MFE319_ENDOMETRIUM	5.10612
MFE296_ENDOMETRIUM	4.97955
GOS3_CENTRAL_NERVOUS_SYSTEM	4.75551
GI1_CENTRAL_NERVOUS_SYSTEM	5.53221
PC14_LUNG	4.61123
KYSE410_OESOPHAGUS	4.40564
A204_SOFT_TISSUE	5.39568
PATU8902_PANCREAS	3.36752
NCIH810_LUNG	5.38551
RERFLCMS_LUNG	5.09098
L1236_HAEMATOPOIETIC_AND_LYMPHOID_TISSUE	3.11876
DANG_PANCREAS	4.06317
NCIH460_LUNG	5.0711
KYSE140_OESOPHAGUS	4.26199
KYSE180_OESOPHAGUS	4.3567
HUPT3_PANCREAS	4.47648
EFE184_ENDOMETRIUM	4.62443
GCIY_STOMACH	3.88586
SH10TC_STOMACH	4.66333
CAOV4_OVARY	4.53023
HCC2218_BREAST	4.6356
KMS21BM_HAEMATOPOIETIC_AND_LYMPHOID_TISSUE	3.90278
KMS26_HAEMATOPOIETIC_AND_LYMPHOID_TISSUE	4.55698
KMS27_HAEMATOPOIETIC_AND_LYMPHOID_TISSUE	4.57442
KO52_HAEMATOPOIETIC_AND_LYMPHOID_TISSUE	3.4026
KMS28BM_HAEMATOPOIETIC_AND_LYMPHOID_TISSUE	4.81922
KNS60_CENTRAL_NERVOUS_SYSTEM	4.88745
KNS81_CENTRAL_NERVOUS_SYSTEM	4.08215
KPNSI9S_AUTONOMIC_GANGLIA	5.57
LU99_LUNG	4.70162
KMS34_HAEMATOPOIETIC_AND_LYMPHOID_TISSUE	3.81331
MKN1_STOMACH	4.33079
MKN74_STOMACH	3.96318
KP3_PANCREAS	4.54981
NCO2_HAEMATOPOIETIC_AND_LYMPHOID_TISSUE	2.79585
KHM1B_HAEMATOPOIETIC_AND_LYMPHOID_TISSUE	3.32171
HSC2_UPPER_AERODIGESTIVE_TRACT	4.08148
KG1C_CENTRAL_NERVOUS_SYSTEM	4.40372
HUH7_LIVER	5.04814
KMBC2_URINARY_TRACT	3.77519
KMRC20_KIDNEY	5.60366
HUCCT1_BILIARY_TRACT	3.53822
KIJK_HAEMATOPOIETIC_AND_LYMPHOID_TISSUE	2.37218
A4FUK_HAEMATOPOIETIC_AND_LYMPHOID_TISSUE	3.75214
KALS1_CENTRAL_NERVOUS_SYSTEM	4.50228
HEC108_ENDOMETRIUM	4.44666
HEL9217_HAEMATOPOIETIC_AND_LYMPHOID_TISSUE	4.97422
HUH28_BILIARY_TRACT	5.36402
CMK115_HAEMATOPOIETIC_AND_LYMPHOID_TISSUE
HEC265_ENDOMETRIUM	5.50798
CAL12T_LUNG	3.36683
THP1_HAEMATOPOIETIC_AND_LYMPHOID_TISSUE	3.99639
A3KAW_HAEMATOPOIETIC_AND_LYMPHOID_TISSUE	4.57505
SKNSH_AUTONOMIC_GANGLIA	4.48796
HCC1954_BREAST	5.2598
CAMA1_BREAST	5.07171
HEC6_ENDOMETRIUM	5.20277
AM38_CENTRAL_NERVOUS_SYSTEM	3.87982
HEC50B_ENDOMETRIUM	5.45475
HSC3_UPPER_AERODIGESTIVE_TRACT	4.06699
HSC4_UPPER_AERODIGESTIVE_TRACT	5.54388
KMS11_HAEMATOPOIETIC_AND_LYMPHOID_TISSUE	4.4234
KP4_PANCREAS	4.04518
KE39_STOMACH	3.22505
COV504_OVARY
KE97_HAEMATOPOIETIC_AND_LYMPHOID_TISSUE	2.21987
VMRCRCW_KIDNEY	4.25621
HGC27_STOMACH	4.37967
LUDLU1_LUNG	5.20527
HUG1N_STOMACH	3.03215
U266B1_HAEMATOPOIETIC_AND_LYMPHOID_TISSUE	3.76503
NUGC4_STOMACH	3.50632
BGC823_STOMACH
HMC18_BREAST	4.40484
CAS1_CENTRAL_NERVOUS_SYSTEM	4.80431
KMM1_HAEMATOPOIETIC_AND_LYMPHOID_TISSUE	4.82998
CORL23_LUNG	4.09524
MORCPR_LUNG	5.70588
HARA_LUNG	5.15401
SKOV3_OVARY	5.37035
HPAFII_PANCREAS	3.89373
MC116_HAEMATOPOIETIC_AND_LYMPHOID_TISSUE	3.87956
NCIH1568_LUNG	4.87807
CA46_HAEMATOPOIETIC_AND_LYMPHOID_TISSUE	3.16855
A498_KIDNEY	6.22106
BCP1_HAEMATOPOIETIC_AND_LYMPHOID_TISSUE	3.34492
A673_BONE	4.74582
AU565_BREAST	5.46734
COLO201_LARGE_INTESTINE	4.63888
CAPAN1_PANCREAS	4.20115
NCIH1563_LUNG	5.0432
NCIH358_LUNG	5.08469
CFPAC1_PANCREAS	4.19294
NIHOVCAR3_OVARY	5.15389
NCIH1650_LUNG	4.36062
NCIH1793_LUNG	4.82623
NCIH1437_LUNG	5.35379
KNS62_LUNG	3.95173
HS578T_BREAST	4.1483
BT20_BREAST	4.6428
SNU182_LIVER	5.04959
SKNMC_BONE	4.02499
HH_HAEMATOPOIETIC_AND_LYMPHOID_TISSUE	-3.65716
FADU_UPPER_AERODIGESTIVE_TRACT	4.67505
SJRH30_SOFT_TISSUE
MDAMB361_BREAST	5.23714
MDAMB436_BREAST	4.74243
PANC0213_PANCREAS	5.12733
DB_HAEMATOPOIETIC_AND_LYMPHOID_TISSUE	2.86511
RDES_BONE	5.68698
CAL27_UPPER_AERODIGESTIVE_TRACT	4.06286
MESSA_SOFT_TISSUE	6.33224
SW1271_LUNG	3.67602
NCIH1792_LUNG	4.15273
GCT_SOFT_TISSUE	4.2553
SKBR3_BREAST	5.15065
SNU16_STOMACH	3.94965
NCIH82_LUNG	5.12759
NCIN87_STOMACH	4.74333
U2OS_BONE	4.64724
H4_CENTRAL_NERVOUS_SYSTEM	4.44466
GDM1_HAEMATOPOIETIC_AND_LYMPHOID_TISSUE	4.07492
HCC1143_BREAST	4.09664
T24_URINARY_TRACT	3.99131
G401_SOFT_TISSUE	5.85242
HCC1937_BREAST	4.88179
HCC1569_BREAST	5.75199
OCUM1_STOMACH	1.93387
SAOS2_BONE	4.33995
D283MED_CENTRAL_NERVOUS_SYSTEM	5.02292
SCC9_UPPER_AERODIGESTIVE_TRACT	4.28429
HCC1395_BREAST	4.82659
NMCG1_CENTRAL_NERVOUS_SYSTEM	4.19116
TEN_ENDOMETRIUM	4.87481
HS604T_HAEMATOPOIETIC_AND_LYMPHOID_TISSUE
TE9_OESOPHAGUS	4.89402
KNS42_CENTRAL_NERVOUS_SYSTEM	5.50358
KYSE520_OESOPHAGUS	4.85241
KYSE270_OESOPHAGUS	5.05334
JHUEM1_ENDOMETRIUM	5.0449
YH13_CENTRAL_NERVOUS_SYSTEM	4.28216
IALM_LUNG	4.0726
NCIH2052_PLEURA	3.74887
EB2_HAEMATOPOIETIC_AND_LYMPHOID_TISSUE
SKNFI_AUTONOMIC_GANGLIA	5.50425
SKNAS_AUTONOMIC_GANGLIA	4.9845
GA10_HAEMATOPOIETIC_AND_LYMPHOID_TISSUE	2.02725
SNU398_LIVER	4.27541
SNU423_LIVER	4.73117
SCC4_UPPER_AERODIGESTIVE_TRACT	5.11724
EB1_HAEMATOPOIETIC_AND_LYMPHOID_TISSUE	3.67117
HCC1187_BREAST	5.24377
SNU387_LIVER	4.29188
DAUDI_HAEMATOPOIETIC_AND_LYMPHOID_TISSUE	2.94903
HT_HAEMATOPOIETIC_AND_LYMPHOID_TISSUE	2.72008
MJ_HAEMATOPOIETIC_AND_LYMPHOID_TISSUE	0.708515
JM1_HAEMATOPOIETIC_AND_LYMPHOID_TISSUE	3.23543
C2BBE1_LARGE_INTESTINE	4.56195
SKES1_BONE	5.03131
EPLC272H_LUNG	4.2399
BXPC3_PANCREAS	2.92231
NCIH1355_LUNG	4.98751
SNU5_STOMACH	2.9733
SNU475_LIVER	5.34588
HEC251_ENDOMETRIUM	5.25381
HCC95_LUNG	5.55281
253J_URINARY_TRACT	6.37923
HCC1438_LUNG	4.67826
253JBV_URINARY_TRACT	5.46649
RPMI7951_SKIN	4.61254
SNU1066_UPPER_AERODIGESTIVE_TRACT	5.13605
SNU1041_UPPER_AERODIGESTIVE_TRACT	4.77734
HCC2108_LUNG	5.2495
COLO783_SKIN	4.21507
HCC1359_LUNG	4.2102
BICR31_UPPER_AERODIGESTIVE_TRACT	4.38403
COV362_OVARY	4.51642
COLO792_SKIN	4.14699
COV434_OVARY	4.38207
WM983B_SKIN	3.76987
HS751T_HAEMATOPOIETIC_AND_LYMPHOID_TISSUE	3.88332
LS513_LARGE_INTESTINE	4.43751
NCIH2110_LUNG	4.09115
CHAGOK1_LUNG	3.35072
DMS454_LUNG	4.80161
CORL47_LUNG	5.11314
FTC238_THYROID	4.67266
DMS273_LUNG	4.17984
FTC133_THYROID	5.4587
CORL311_LUNG	4.68992
NCIH2286_LUNG	5.03469
NCIH1339_LUNG	5.62794
WM793_SKIN	4.67969
A704_KIDNEY	5.89495
MDAMB435S_SKIN	4.44758
WM1799_SKIN	4.0982
MEWO_SKIN	4.70262
WM88_SKIN	5.04602
NCIH2081_LUNG	5.26552
HS255T_LARGE_INTESTINE	3.93868
NCIH1092_LUNG	4.94186
SW837_LARGE_INTESTINE	4.36598
JHH6_LIVER	4.67775
IGR1_SKIN	4.17241
NCIH1105_LUNG	5.07113
NCIH1436_LUNG	5.33216
NCIH1876_LUNG	4.96248
CORL24_LUNG	4.84588
COV644_OVARY	5.1348
GP2D_LARGE_INTESTINE	5.15041
PECAPJ15_UPPER_AERODIGESTIVE_TRACT	4.9542
CORL88_LUNG	4.48164
CORL95_LUNG	4.46819
PECAPJ49_UPPER_AERODIGESTIVE_TRACT	5.15697
PECAPJ34CLONEC12_UPPER_AERODIGESTIVE_TRACT	4.2811
CORL51_LUNG
RT11284_URINARY_TRACT
PECAPJ41CLONED2_UPPER_AERODIGESTIVE_TRACT	3.75653
OV7_OVARY	3.91342
HT55_LARGE_INTESTINE	4.70292
OAW42_OVARY	5.95795
MDST8_LARGE_INTESTINE	5.6556
OAW28_OVARY	5.84354
SUIT2_PANCREAS	3.89293
LC1SQSF_LUNG
KASUMI1_HAEMATOPOIETIC_AND_LYMPHOID_TISSUE	2.14266
SUPM2_HAEMATOPOIETIC_AND_LYMPHOID_TISSUE	4.41622
SKHEP1_LIVER	3.60121
OVCAR8_OVARY	3.92145
NCIH2172_LUNG	4.70504
ISHIKAWAHERAKLIO02ER_ENDOMETRIUM	5.47871
NCIH596_LUNG	4.35311
NCIH650_LUNG	3.97749
SW1573_LUNG	4.13781
OVMANA_OVARY	4.00639
SKCO1_LARGE_INTESTINE	4.21306
KARPAS299_HAEMATOPOIETIC_AND_LYMPHOID_TISSUE	3.18595
YAPC_PANCREAS	3.30059
HT1197_URINARY_TRACT	3.12099
A253_SALIVARY_GLAND	4.03715
HCC366_LUNG	4.35743
DKMG_CENTRAL_NERVOUS_SYSTEM	3.84073
SNU349_KIDNEY	4.65198
UMUC1_URINARY_TRACT	4.83842
NAMALWA_HAEMATOPOIETIC_AND_LYMPHOID_TISSUE	3.58079
NCIH292_LUNG	5.15159
59M_OVARY	5.25974
U118MG_CENTRAL_NERVOUS_SYSTEM	3.79331
VMRCLCD_LUNG
HCC1833_LUNG	3.43054
RH30_SOFT_TISSUE	5.22533
TCCSUP_URINARY_TRACT	4.70292
SNU601_STOMACH	4.07915
CAL33_UPPER_AERODIGESTIVE_TRACT	4.30921
SNU668_STOMACH	4.74615
CORL279_LUNG	4.64105
GB1_CENTRAL_NERVOUS_SYSTEM	3.91118
KURAMOCHI_OVARY	5.43982
COLO775_HAEMATOPOIETIC_AND_LYMPHOID_TISSUE
COLO684_ENDOMETRIUM	5.72901
KLM1_PANCREAS
GRM_SKIN
SNU685_ENDOMETRIUM	5.31713
CMK86_HAEMATOPOIETIC_AND_LYMPHOID_TISSUE
SNU886_LIVER	4.03392
HCT8_LARGE_INTESTINE
NCCSTCK140_STOMACH	5.04559
NCIH3255_LUNG	5.37783
SNU719_STOMACH	2.72931
SNU489_CENTRAL_NERVOUS_SYSTEM	4.3214
SNU81_LARGE_INTESTINE	4.12161
A2058_SKIN	4.46079
HTK_HAEMATOPOIETIC_AND_LYMPHOID_TISSUE
SNU1040_LARGE_INTESTINE	4.66865
SNU1076_UPPER_AERODIGESTIVE_TRACT	4.55325
SNU175_LARGE_INTESTINE	4.20015
SNU407_LARGE_INTESTINE	5.08128
SNU201_CENTRAL_NERVOUS_SYSTEM	4.65116
KMS20_HAEMATOPOIETIC_AND_LYMPHOID_TISSUE	3.97611
SNU216_STOMACH	4.76702
SNU1196_BILIARY_TRACT	4.37399
SNU1079_BILIARY_TRACT	5.28225
HCC1195_LUNG	4.67802
NCIH854_LUNG	0.210684
SNU466_CENTRAL_NERVOUS_SYSTEM	4.21531
YD38_UPPER_AERODIGESTIVE_TRACT	2.68193
SNU1105_CENTRAL_NERVOUS_SYSTEM	5.03514
SNU283_LARGE_INTESTINE	4.4285
SNU46_UPPER_AERODIGESTIVE_TRACT	3.97755
SNU308_BILIARY_TRACT	4.14016
YD8_UPPER_AERODIGESTIVE_TRACT	4.37848
SNU245_BILIARY_TRACT	3.62264
SNU478_BILIARY_TRACT	3.78641
SNU410_PANCREAS	4.21838
SNU899_UPPER_AERODIGESTIVE_TRACT	4.27452
SNU503_LARGE_INTESTINE	3.96215
SET2_HAEMATOPOIETIC_AND_LYMPHOID_TISSUE	4.22532
SNU738_CENTRAL_NERVOUS_SYSTEM	4.48561
SNU626_CENTRAL_NERVOUS_SYSTEM	6.14778
SNU869_BILIARY_TRACT	4.34185
SNU878_LIVER	4.60405
SNU840_OVARY	4.95871
SNU8_OVARY	4.76373
NCIH684_LIVER	5.14252
IGR39_SKIN	4.1838
ALEXANDERCELLS_LIVER
DAOY_CENTRAL_NERVOUS_SYSTEM	4.04956
HEP3B217_LIVER	5.12119
KYM1_SOFT_TISSUE	4.22745
LC1F_LUNG	4.56977
HLE_LIVER
CMK_HAEMATOPOIETIC_AND_LYMPHOID_TISSUE	5.37401
JMSU1_URINARY_TRACT	4.47064
IMR32_AUTONOMIC_GANGLIA	4.44195
SUDHL8_HAEMATOPOIETIC_AND_LYMPHOID_TISSUE	2.34111
T3M4_PANCREAS	3.99887
COLO818_SKIN
PK45H_PANCREAS	3.26377
HEC59_ENDOMETRIUM	5.60522
CPCN_LUNG
T3M10_LUNG	4.15867
NUGC2_STOMACH	5.60137
PLCPRF5_LIVER	7.70795
KPNYN_AUTONOMIC_GANGLIA	5.48655
CCFSTTG1_CENTRAL_NERVOUS_SYSTEM	4.47076
NCIH929_HAEMATOPOIETIC_AND_LYMPHOID_TISSUE	3.48249
KMRC3_KIDNEY	6.18281
NCIH2023_LUNG	4.96478
DMS153_LUNG	5.06121
NCIH1048_LUNG	5.5942
D341MED_CENTRAL_NERVOUS_SYSTEM	5.19206
NCIH660_PROSTATE	5.63062
NCIH1618_LUNG	5.22701
HS675T_LARGE_INTESTINE	4.53355
PEER_HAEMATOPOIETIC_AND_LYMPHOID_TISSUE	3.34306
SKM1_HAEMATOPOIETIC_AND_LYMPHOID_TISSUE	4.36746
HT144_SKIN	4.31557
SKMEL31_SKIN	4.49375
HS839T_SKIN	3.54148
HS939T_SKIN	4.48651
OCILY3_HAEMATOPOIETIC_AND_LYMPHOID_TISSUE	3.92895
HS819T_BONE	3.49901
NCIH69_LUNG	4.08973
DV90_LUNG	4.43889
ZR751_BREAST	6.04842
KG1_HAEMATOPOIETIC_AND_LYMPHOID_TISSUE	3.41447
SKNBE2_AUTONOMIC_GANGLIA	4.60911
HCC70_BREAST	5.35234
NCIH2452_PLEURA	3.94395
SNU1_STOMACH	3.45025
LOUCY_HAEMATOPOIETIC_AND_LYMPHOID_TISSUE	3.84482
HCC56_LARGE_INTESTINE	4.32407
NCIH1648_LUNG	3.88474
TO175T_HAEMATOPOIETIC_AND_LYMPHOID_TISSUE	3.77727
GLC82_LUNG
MPP89_PLEURA	5.15236
PANC0813_PANCREAS	3.30759
MG63_BONE	4.04404
PK1_PANCREAS	4.52102
HS840T_UPPER_AERODIGESTIVE_TRACT	3.62337
NCIH23_LUNG	3.28055
TE617T_SOFT_TISSUE	4.89991
SW1088_CENTRAL_NERVOUS_SYSTEM	4.26787
ISTMES2_PLEURA	4.2865
NCIH1373_LUNG	3.88707
NCIH1930_LUNG	5.13549
NCIH1623_LUNG	4.35183
HS229T_LUNG	4.19783
NCIH1838_LUNG	4.94939
NCIH1836_LUNG	4.55383
HS688AT_SKIN	3.67428
PANC0504_PANCREAS	3.53292
HS822T_BONE	3.62956
BL70_HAEMATOPOIETIC_AND_LYMPHOID_TISSUE	0.950742
CI1_HAEMATOPOIETIC_AND_LYMPHOID_TISSUE	1.67033
G292CLONEA141B1_BONE	4.57203
RCM1_LARGE_INTESTINE	3.93765
HS737T_BONE	3.70687
HS616T_HAEMATOPOIETIC_AND_LYMPHOID_TISSUE	3.93831
HS600T_SKIN	3.6258
TE159T_SOFT_TISSUE	4.03512
A101D_SKIN	4.05712
NCIH1755_LUNG	5.17859
143B_BONE
RERFLCKJ_LUNG	5.05264
NCIH1693_LUNG	4.301
SW780_URINARY_TRACT	4.49417
HS683_CENTRAL_NERVOUS_SYSTEM	4.79192
RKO_LARGE_INTESTINE	4.51459
HS729_SOFT_TISSUE	3.89134
JHOS2_OVARY	4.84076
MCF7_BREAST	5.39693
U937_HAEMATOPOIETIC_AND_LYMPHOID_TISSUE	4.08555
SKLMS1_SOFT_TISSUE	3.48551
HUTU80_SMALL_INTESTINE	3.84377
HCC202_BREAST	5.82275
MEG01_HAEMATOPOIETIC_AND_LYMPHOID_TISSUE	2.85874
REH_HAEMATOPOIETIC_AND_LYMPHOID_TISSUE	4.02057
ONS76_CENTRAL_NERVOUS_SYSTEM	5.27792
RPMI6666_HAEMATOPOIETIC_AND_LYMPHOID_TISSUE
SNUC1_LARGE_INTESTINE	1.93921
SKNDZ_AUTONOMIC_GANGLIA	4.51164
DMS114_LUNG	4.97392
TT_OESOPHAGUS	4.36055
OCILY10_HAEMATOPOIETIC_AND_LYMPHOID_TISSUE
ST486_HAEMATOPOIETIC_AND_LYMPHOID_TISSUE	2.92818
OC315_OVARY
OC314_OVARY	5.32632
SW1353_BONE	3.99629
MDAMB157_BREAST	5.67829
LN18_CENTRAL_NERVOUS_SYSTEM	3.91351
769P_KIDNEY	5.94932
786O_KIDNEY	5.23565
CAOV3_OVARY	4.4547
HEPG2_LIVER	3.72902
MOLT4_HAEMATOPOIETIC_AND_LYMPHOID_TISSUE
NCIH524_LUNG	4.58077
NCIH209_LUNG	4.95007
MIAPACA2_PANCREAS	4.82284
MCAS_OVARY	3.04794
SBC5_LUNG	5.34335
COLO829_SKIN	4.87221
VCAP_PROSTATE	5.01555
COLO704_OVARY
IPC298_SKIN	3.38084
CAPAN2_PANCREAS	4.43137
EFM192A_BREAST	5.33909
HS766T_PANCREAS	4.55791
EFO27_OVARY	4.98122
A2780_OVARY	5.17204
NCIH196_LUNG	5.55462
IGROV1_OVARY	4.92973
NCIH889_LUNG	4.20327
NCIH211_LUNG	4.84006
HS571T_OVARY
MDAPCA2B_PROSTATE	4.95884
SKMEL24_SKIN	4.09552
K029AX_SKIN	4.34504
HT1376_URINARY_TRACT	3.24256
NCIH2171_LUNG	4.44112
PANC1005_PANCREAS	4.11005
EVSAT_BREAST
HS695T_SKIN	4.83809
CHL1_SKIN
LOUNH91_LUNG	5.5745
LK2_LUNG	5.16572
TOV21G_OVARY	6.64199
SKMEL3_SKIN	4.16824
ASPC1_PANCREAS	3.00821
OVSAHO_OVARY	5.97497
NCIH441_LUNG	4.71899
RERFLCSQ1_LUNG	4.49257
NCIH2030_LUNG	4.15285
HMCB_SKIN	5.04297
FUOV1_OVARY	3.83315
MALME3M_SKIN	4.33865
KMS12BM_HAEMATOPOIETIC_AND_LYMPHOID_TISSUE	3.78509
T98G_CENTRAL_NERVOUS_SYSTEM	4.69863
HL60_HAEMATOPOIETIC_AND_LYMPHOID_TISSUE	1.67713
DBTRG05MG_CENTRAL_NERVOUS_SYSTEM	4.71516
HEYA8_OVARY	3.33055
NCIH2122_LUNG	4.38414
MELJUSO_SKIN	4.42197
SW620_LARGE_INTESTINE	4.08285
HCT116_LARGE_INTESTINE	3.78309
VMRCRCZ_KIDNEY	5.41968
DU145_PROSTATE	4.60714
MM1S_HAEMATOPOIETIC_AND_LYMPHOID_TISSUE	4.24962
L33_PANCREAS	5.07573
SKMEL2_SKIN
A549_LUNG	4.3368
A172_CENTRAL_NERVOUS_SYSTEM	5.02074
NCIH1975_LUNG	4.24329
COLO679_SKIN	4.09
KP2_PANCREAS	4.54392
HUH1_LIVER	4.15349
MDAMB453_BREAST	5.97572
PANC0403_PANCREAS	4.72962
TYKNU_OVARY	3.6827
OVISE_OVARY	4.97709
EFM19_BREAST	4.83225
MELHO_SKIN	3.56592
RL_HAEMATOPOIETIC_AND_LYMPHOID_TISSUE	2.71864
G361_SKIN	4.61435
NCIH647_LUNG	4.28325
GMS10_CENTRAL_NERVOUS_SYSTEM	3.95273
SEM_HAEMATOPOIETIC_AND_LYMPHOID_TISSUE	3.14933
HLFA_LUNG	3.6208
42MGBA_CENTRAL_NERVOUS_SYSTEM	3.83524
KCIMOH1_PANCREAS
HCC44_LUNG	4.19294
KYSE70_OESOPHAGUS	4.09896
1321N1_CENTRAL_NERVOUS_SYSTEM
GAMG_CENTRAL_NERVOUS_SYSTEM	4.31584
NCIH522_LUNG	4.86542
EN_ENDOMETRIUM	6.00312
PK59_PANCREAS	3.16505
SNB19_CENTRAL_NERVOUS_SYSTEM
COLO741_SKIN	4.82281
HDMYZ_HAEMATOPOIETIC_AND_LYMPHOID_TISSUE	4.39609
NCIH661_LUNG	6.2025
LNCAPCLONEFGC_PROSTATE	5.79125
LS411N_LARGE_INTESTINE	4.11951
HCC78_LUNG	5.20849
YKG1_CENTRAL_NERVOUS_SYSTEM	5.36626
ESS1_ENDOMETRIUM	4.63655
U251MG_CENTRAL_NERVOUS_SYSTEM	5.07624
TE11_OESOPHAGUS	4.08639
KS1_CENTRAL_NERVOUS_SYSTEM	4.24294
HEC1A_ENDOMETRIUM	5.17828
TE1_OESOPHAGUS	4.5717
JHUEM2_ENDOMETRIUM	5.57531
MOGGUVW_CENTRAL_NERVOUS_SYSTEM
RERFLCAD1_LUNG	4.29051
TE5_OESOPHAGUS	4.92827
KELLY_AUTONOMIC_GANGLIA	5.25529
NCIH1155_LUNG	4.0477
TE15_OESOPHAGUS	4.28124
ABC1_LUNG	5.57742
8MGBA_CENTRAL_NERVOUS_SYSTEM	4.6908
NCIH1703_LUNG	4.24274
AGS_STOMACH	5.32133
QGP1_PANCREAS	4.6022
DETROIT562_UPPER_AERODIGESTIVE_TRACT	3.99959
BT474_BREAST	2.48019
ACHN_KIDNEY	5.61789
LOVO_LARGE_INTESTINE	3.62831
NCIH1581_LUNG	4.59467
SCABER_URINARY_TRACT	3.75919
SKMEL30_SKIN	4.25166
OVKATE_OVARY	5.02471
22RV1_PROSTATE	5.2784
C32_SKIN	5.85492
PANC0327_PANCREAS	4.39763
RPMI8226_HAEMATOPOIETIC_AND_LYMPHOID_TISSUE	3.40479
DLD1_LARGE_INTESTINE
ES2_OVARY	4.57442
NCIH1395_LUNG	4.89007
NCIH1781_LUNG	5.286
LS1034_LARGE_INTESTINE	3.65008
G402_SOFT_TISSUE	6.3467
NCIH146_LUNG	5.03077
SW48_LARGE_INTESTINE	4.22432
CHP212_AUTONOMIC_GANGLIA	4.3951
LS180_LARGE_INTESTINE	4.20244
SW403_LARGE_INTESTINE	4.86077
NCIH747_LARGE_INTESTINE	3.93574
RT4_URINARY_TRACT	3.66712
KATOIII_STOMACH	3.33491
BDCM_HAEMATOPOIETIC_AND_LYMPHOID_TISSUE	3.25216
SW1417_LARGE_INTESTINE	3.21319
SW948_LARGE_INTESTINE	5.10493
HS606T_BREAST	3.7317
MDAMB415_BREAST	4.81605
DMS79_LUNG	4.20899
NCIH2106_LUNG	4.65655
SW579_THYROID	3.7164
MDAMB468_BREAST	4.61576
NCIH526_LUNG	3.97749
TOV112D_OVARY	4.35144
BT549_BREAST	5.63831
NCIH2196_LUNG	5.27386
CAL851_BREAST	4.42571
EFO21_OVARY	3.40989
A375_SKIN	4.55523
HT29_LARGE_INTESTINE	4.86648
NCIH446_LUNG	5.1276
HS294T_SKIN	4.31988
SKMEL5_SKIN	4.41658
HS944T_SKIN	4.64528
TCCPAN2_PANCREAS	3.54853
DOV13_OVARY
RMGI_OVARY	6.20787
PC3_PROSTATE	6.7687
K562_HAEMATOPOIETIC_AND_LYMPHOID_TISSUE	4.84886
RT112_URINARY_TRACT	4.71469
NUGC3_STOMACH	4.81287
U87MG_CENTRAL_NERVOUS_SYSTEM	3.82309
CAKI2_KIDNEY	5.63894
OE19_OESOPHAGUS	3.99154
KMRC2_KIDNEY	5.93087
JHH2_LIVER	4.95097
IM95_STOMACH	3.76613
MV411_HAEMATOPOIETIC_AND_LYMPHOID_TISSUE	3.18219
WM2664_SKIN	2.86544
KMRC1_KIDNEY	6.46257
KM12_LARGE_INTESTINE	5.48113
COLO849_SKIN
T84_LARGE_INTESTINE	3.01047
CALU1_LUNG	3.66753
LOXIMVI_SKIN	4.06753
NCIH2170_LUNG	4.71401
SQ1_LUNG	4.48478
AN3CA_ENDOMETRIUM	5.58099
NCIH2444_LUNG	5.04882
UACC257_SKIN	4.37329
KYSE510_OESOPHAGUS	5.01254
MOLM13_HAEMATOPOIETIC_AND_LYMPHOID_TISSUE	2.7271
HUPT4_PANCREAS	3.25005
MOGGCCM_CENTRAL_NERVOUS_SYSTEM
KYSE30_OESOPHAGUS	4.97013
KYSE150_OESOPHAGUS	3.83135
PSN1_PANCREAS	4.7998
NCIH1299_LUNG	3.23558
PATU8988T_PANCREAS	4.12297
IGR37_SKIN	4.36082
LN443_CENTRAL_NERVOUS_SYSTEM	3.88638
SLR23_KIDNEY	5.0433
HMEL_BREAST	4.46784
OELE_OVARY	4.90528
LN235_CENTRAL_NERVOUS_SYSTEM	5.12603
BJHTERT_SKIN
LN428_CENTRAL_NERVOUS_SYSTEM	4.54124
SLR24_KIDNEY	5.23069
EWS502_BONE	5.20987
SALE_LUNG	4.70204
HCC2814_LUNG	5.85686
SKRC31_KIDNEY
TIG3TD_LUNG	4.33992
TC32_BONE
SF172_CENTRAL_NERVOUS_SYSTEM	3.59859
PRECLH_PROSTATE	4.73846
U343_CENTRAL_NERVOUS_SYSTEM	4.65864
RCC4_KIDNEY
LN215_CENTRAL_NERVOUS_SYSTEM	5.03431
LN464_CENTRAL_NERVOUS_SYSTEM	3.72998
SLR25_KIDNEY	5.94974
U178_CENTRAL_NERVOUS_SYSTEM	5.39706
F5_CENTRAL_NERVOUS_SYSTEM
HEKTE_KIDNEY	4.80604
SLR26_KIDNEY	5.46794
SKRC20_KIDNEY	5.79845
SF767_CENTRAL_NERVOUS_SYSTEM	4.00328
A1207_CENTRAL_NERVOUS_SYSTEM	2.91365
LN319_CENTRAL_NERVOUS_SYSTEM	5.26081
HCC364_LUNG	5.21463
UMRC6_KIDNEY
LN382_CENTRAL_NERVOUS_SYSTEM	4.62179
IOMMLEE_CENTRAL_NERVOUS_SYSTEM	3.09315
UMRC2_KIDNEY
DFCI024_LUNG
HCC1897_LUNG
SLR21_KIDNEY	5.89961
LNZ308_CENTRAL_NERVOUS_SYSTEM	3.5586
LN340_CENTRAL_NERVOUS_SYSTEM	4.87164
HCC827GR5_LUNG	4.80816
SLR20_KIDNEY	5.28702
HK2_KIDNEY
EW8_BONE	4.86999
UOK101_KIDNEY	4.88083
JHESOAD1_OESOPHAGUS	4.18349
CH157MN_CENTRAL_NERVOUS_SYSTEM	4.259
MOLP2_HAEMATOPOIETIC_AND_LYMPHOID_TISSUE	4.62882
SCC25_UPPER_AERODIGESTIVE_TRACT	3.82506
UT7_HAEMATOPOIETIC_AND_LYMPHOID_TISSUE
MHHNB11_AUTONOMIC_GANGLIA	6.22451
HCC1806_BREAST	4.81107
GRANTA519_HAEMATOPOIETIC_AND_LYMPHOID_TISSUE	4.74678
MONOMAC6_HAEMATOPOIETIC_AND_LYMPHOID_TISSUE	3.7588
MKN7_STOMACH	4.42511
SW1710_URINARY_TRACT	5.39081
MOLT13_HAEMATOPOIETIC_AND_LYMPHOID_TISSUE	2.89483
SR786_HAEMATOPOIETIC_AND_LYMPHOID_TISSUE	2.65647
SCC15_UPPER_AERODIGESTIVE_TRACT	4.68078
RS5_PLEURA	3.68841
NCIH2126_LUNG	4.67298
NCIH2141_LUNG
NCIH1385_LUNG	6.31529
HCC827_LUNG	4.37018
RD_SOFT_TISSUE	4.50131
TT_THYROID	6.10296
TF1_HAEMATOPOIETIC_AND_LYMPHOID_TISSUE	3.68896
HS172T_URINARY_TRACT	3.86049
HS834T_SKIN	3.72076
TE125T_SOFT_TISSUE	3.43688
8305C_THYROID	5.02959
UACC812_BREAST	4.68835
ALLSIL_HAEMATOPOIETIC_AND_LYMPHOID_TISSUE	2.89163
KASUMI2_HAEMATOPOIETIC_AND_LYMPHOID_TISSUE	3.57529
DND41_HAEMATOPOIETIC_AND_LYMPHOID_TISSUE	3.69378
ME1_HAEMATOPOIETIC_AND_LYMPHOID_TISSUE	0.807851
DM3_PLEURA	3.79042
JEKO1_HAEMATOPOIETIC_AND_LYMPHOID_TISSUE	3.58881
JJN3_HAEMATOPOIETIC_AND_LYMPHOID_TISSUE	1.88259
NUDHL1_HAEMATOPOIETIC_AND_LYMPHOID_TISSUE	3.2549
CL14_LARGE_INTESTINE	4.9165
KYO1_HAEMATOPOIETIC_AND_LYMPHOID_TISSUE	4.86868
JL1_PLEURA	4.30588
CAL148_BREAST	6.3678
NALM19_HAEMATOPOIETIC_AND_LYMPHOID_TISSUE	3.78771
HPBALL_HAEMATOPOIETIC_AND_LYMPHOID_TISSUE	4.22232
SUPT11_HAEMATOPOIETIC_AND_LYMPHOID_TISSUE	3.66083
CL40_LARGE_INTESTINE	4.30746
MDAMB134VI_BREAST	4.58882
HCC1500_BREAST	5.18842
HCC1599_BREAST	5.23285
SUPHD1_HAEMATOPOIETIC_AND_LYMPHOID_TISSUE
MOTN1_HAEMATOPOIETIC_AND_LYMPHOID_TISSUE
OCIAML3_HAEMATOPOIETIC_AND_LYMPHOID_TISSUE	4.60766
SUDHL10_HAEMATOPOIETIC_AND_LYMPHOID_TISSUE	3.01793
SUDHL4_HAEMATOPOIETIC_AND_LYMPHOID_TISSUE	2.44145
RH41_SOFT_TISSUE	4.24852
OCILY19_HAEMATOPOIETIC_AND_LYMPHOID_TISSUE	3.68896
MOLM6_HAEMATOPOIETIC_AND_LYMPHOID_TISSUE	4.0349
SKMM2_HAEMATOPOIETIC_AND_LYMPHOID_TISSUE	4.64828
KASUMI6_HAEMATOPOIETIC_AND_LYMPHOID_TISSUE	3.43595
HS698T_LARGE_INTESTINE	3.8491
UACC893_BREAST	4.87171
MINO_HAEMATOPOIETIC_AND_LYMPHOID_TISSUE	2.25483
CHP126_AUTONOMIC_GANGLIA	4.593
COLO680N_OESOPHAGUS	5.14387
COLO678_LARGE_INTESTINE	4.88786
LAMA84_HAEMATOPOIETIC_AND_LYMPHOID_TISSUE	4.22402
CMLT1_HAEMATOPOIETIC_AND_LYMPHOID_TISSUE	3.35613
EHEB_HAEMATOPOIETIC_AND_LYMPHOID_TISSUE	3.12844
CAL54_KIDNEY	5.28624
BV173_HAEMATOPOIETIC_AND_LYMPHOID_TISSUE	4.56847
DOHH2_HAEMATOPOIETIC_AND_LYMPHOID_TISSUE	1.9608
EOL1_HAEMATOPOIETIC_AND_LYMPHOID_TISSUE	2.27777
NALM6_HAEMATOPOIETIC_AND_LYMPHOID_TISSUE	3.73556
VMCUB1_URINARY_TRACT	4.63815
LP1_HAEMATOPOIETIC_AND_LYMPHOID_TISSUE	5.03536
LXF289_LUNG	3.88565
MONOMAC1_HAEMATOPOIETIC_AND_LYMPHOID_TISSUE	3.50045
PL21_HAEMATOPOIETIC_AND_LYMPHOID_TISSUE	2.54946
PF382_HAEMATOPOIETIC_AND_LYMPHOID_TISSUE	3.93498
NALM1_HAEMATOPOIETIC_AND_LYMPHOID_TISSUE	3.3013
OCIAML2_HAEMATOPOIETIC_AND_LYMPHOID_TISSUE	4.29633
MHHCALL3_HAEMATOPOIETIC_AND_LYMPHOID_TISSUE	4.28076
JURLMK1_HAEMATOPOIETIC_AND_LYMPHOID_TISSUE	4.17677
OCIAML5_HAEMATOPOIETIC_AND_LYMPHOID_TISSUE	3.17007
KE37_HAEMATOPOIETIC_AND_LYMPHOID_TISSUE	3.43783
JK1_HAEMATOPOIETIC_AND_LYMPHOID_TISSUE	4.86557
RI1_HAEMATOPOIETIC_AND_LYMPHOID_TISSUE	2.99143
KARPAS422_HAEMATOPOIETIC_AND_LYMPHOID_TISSUE	2.91965
L540_HAEMATOPOIETIC_AND_LYMPHOID_TISSUE	-3.20848
CAL78_BONE	3.51367
HDQP1_BREAST	3.71039
MHHCALL4_HAEMATOPOIETIC_AND_LYMPHOID_TISSUE	2.61819
MUTZ5_HAEMATOPOIETIC_AND_LYMPHOID_TISSUE	3.48169
ONCODG1_OVARY	4.91859
HDLM2_HAEMATOPOIETIC_AND_LYMPHOID_TISSUE	2.76759
CAL29_URINARY_TRACT	4.57609
KOPN8_HAEMATOPOIETIC_AND_LYMPHOID_TISSUE	1.83362
SCLC21H_LUNG	4.93702
CALU3_LUNG	4.88887
NCIH1435_LUNG	4.2504
NCIH2009_LUNG	4.41702
NCIH1869_LUNG	5.04193
HS852T_SKIN	5.00718
HCC1419_BREAST	4.13834
BT483_BREAST	5.80783
HS281T_BREAST	3.62837
HS934T_SKIN	3.82209
HCC4006_LUNG	4.72117
HCC1428_BREAST	4.86677
KU812_HAEMATOPOIETIC_AND_LYMPHOID_TISSUE	4.23711
SHP77_LUNG	5.07918
TE441T_SOFT_TISSUE	4.04516
NB1_AUTONOMIC_GANGLIA	5.44877
HS274T_BREAST	3.72625
PFEIFFER_HAEMATOPOIETIC_AND_LYMPHOID_TISSUE	3.15142
ZR7530_BREAST	4.23094
HS863T_BONE	3.70385
NCIH841_LUNG	6.0684
HS821T_BONE	3.97748
NCIH1944_LUNG	4.89854
NCIH2405_LUNG	5.02446
DEL_HAEMATOPOIETIC_AND_LYMPHOID_TISSUE	4.6715
BEN_LUNG	4.82213
COLO320_LARGE_INTESTINE	4.44008
RPMI8402_HAEMATOPOIETIC_AND_LYMPHOID_TISSUE	4.01712
SUDHL1_HAEMATOPOIETIC_AND_LYMPHOID_TISSUE	3.45049
P12ICHIKAWA_HAEMATOPOIETIC_AND_LYMPHOID_TISSUE	3.47063
BFTC905_URINARY_TRACT	3.75253
BFTC909_KIDNEY	5.31539
MHHES1_BONE	5.59118
JVM3_HAEMATOPOIETIC_AND_LYMPHOID_TISSUE	2.35704
NOMO1_HAEMATOPOIETIC_AND_LYMPHOID_TISSUE	3.37114
NCIH727_LUNG	3.90472
HS343T_BREAST	3.70027
HCC2935_LUNG	4.80988
HS888T_BONE	3.982
MKN45_STOMACH	3.72083
8505C_THYROID	3.02088
KU1919_URINARY_TRACT	5.05205
KCL22_HAEMATOPOIETIC_AND_LYMPHOID_TISSUE	3.79808
CADOES1_BONE	5.53761
S117_SOFT_TISSUE	4.51023
EM2_HAEMATOPOIETIC_AND_LYMPHOID_TISSUE	3.27097
COLO677_HAEMATOPOIETIC_AND_LYMPHOID_TISSUE
OPM2_HAEMATOPOIETIC_AND_LYMPHOID_TISSUE	5.17335
CAL62_THYROID	4.65156
LCLC103H_LUNG	4.42815
JURKAT_HAEMATOPOIETIC_AND_LYMPHOID_TISSUE	4.45018
697_HAEMATOPOIETIC_AND_LYMPHOID_TISSUE	3.88192
MHHCALL2_HAEMATOPOIETIC_AND_LYMPHOID_TISSUE	3.59215
M07E_HAEMATOPOIETIC_AND_LYMPHOID_TISSUE	3.09946
L428_HAEMATOPOIETIC_AND_LYMPHOID_TISSUE	3.03226
MOLT16_HAEMATOPOIETIC_AND_LYMPHOID_TISSUE	1.07217
NB4_HAEMATOPOIETIC_AND_LYMPHOID_TISSUE	2.8763
LCLC97TM1_LUNG	4.87542
2313287_STOMACH	4.88636
BHT101_THYROID	4.94739
JVM2_HAEMATOPOIETIC_AND_LYMPHOID_TISSUE	3.92579
CAL51_BREAST	5.38761
L363_HAEMATOPOIETIC_AND_LYMPHOID_TISSUE	5.0133
KMH2_HAEMATOPOIETIC_AND_LYMPHOID_TISSUE	4.58921
SIMA_AUTONOMIC_GANGLIA	5.46331
NUDUL1_HAEMATOPOIETIC_AND_LYMPHOID_TISSUE	2.81011
BC3C_URINARY_TRACT	4.33141
SUDHL6_HAEMATOPOIETIC_AND_LYMPHOID_TISSUE	2.29468
KARPAS620_HAEMATOPOIETIC_AND_LYMPHOID_TISSUE	2.73591
REC1_HAEMATOPOIETIC_AND_LYMPHOID_TISSUE	3.26858
OCIM1_HAEMATOPOIETIC_AND_LYMPHOID_TISSUE	4.83344
MEC1_HAEMATOPOIETIC_AND_LYMPHOID_TISSUE	3.57283
SIGM5_HAEMATOPOIETIC_AND_LYMPHOID_TISSUE	3.38384
SUDHL5_HAEMATOPOIETIC_AND_LYMPHOID_TISSUE	1.14802
BCPAP_THYROID	4.55289
639V_URINARY_TRACT	4.17384
CL11_LARGE_INTESTINE	4.64376
TT2609C02_THYROID	3.86777
MEC2_HAEMATOPOIETIC_AND_LYMPHOID_TISSUE
CL34_LARGE_INTESTINE	4.613
RCHACV_HAEMATOPOIETIC_AND_LYMPHOID_TISSUE	4.0551
CAL120_BREAST	3.74038
647V_URINARY_TRACT	4.91231
RH18_SOFT_TISSUE	4.18812
MOLM16_HAEMATOPOIETIC_AND_LYMPHOID_TISSUE	4.24968
F36P_HAEMATOPOIETIC_AND_LYMPHOID_TISSUE	5.23616
EJM_HAEMATOPOIETIC_AND_LYMPHOID_TISSUE	3.56283
WSUDLCL2_HAEMATOPOIETIC_AND_LYMPHOID_TISSUE	3.35765
JIMT1_BREAST	4.82135
ML1_THYROID	5.82024
AMO1_HAEMATOPOIETIC_AND_LYMPHOID_TISSUE	3.73409
MOLP8_HAEMATOPOIETIC_AND_LYMPHOID_TISSUE	4.91558
COLO699_LUNG
JHUEM7_ENDOMETRIUM	5.75352
KP1NL_PANCREAS
KP1N_PANCREAS
M059J_CENTRAL_NERVOUS_SYSTEM
MB157_BREAST
OE21_OESOPHAGUS	4.08877
SF8657_SKIN
SNUC2B_LARGE_INTESTINE
NCIH2073_LUNG	4.13942
HN_UPPER_AERODIGESTIVE_TRACT
HRT18_LARGE_INTESTINE
HCT116G9B_ENGINEERED
HCT116PA_ENGINEERED
HNT34_HAEMATOPOIETIC_AND_LYMPHOID_TISSUE	3.05075
MUTZ2_HAEMATOPOIETIC_AND_LYMPHOID_TISSUE
PLB985_HAEMATOPOIETIC_AND_LYMPHOID_TISSUE	2.69734
SKNO1_HAEMATOPOIETIC_AND_LYMPHOID_TISSUE	2.25615
LC1_LUNG
MOLT3_HAEMATOPOIETIC_AND_LYMPHOID_TISSUE	3.54309
HOP62_LUNG	4.98915
EKVX_LUNG	5.70378
OVCAR5_OVARY
UO31_KIDNEY	4.87949
TK10_KIDNEY
SF268_CENTRAL_NERVOUS_SYSTEM	4.71193
SF539_CENTRAL_NERVOUS_SYSTEM	5.40899
SNB75_CENTRAL_NERVOUS_SYSTEM	4.9055
HOP92_LUNG	5.64125
ACCS_URINARY_TRACT
MUTZ3_HAEMATOPOIETIC_AND_LYMPHOID_TISSUE	2.73493
A427_LUNG	3.81453
BT12_SOFT_TISSUE	6.53033
C8166_HAEMATOPOIETIC_AND_LYMPHOID_TISSUE	2.23657
CACO2_LARGE_INTESTINE	4.81704
HCC2429_LUNG	3.87421
HCC2450_LUNG	5.52777
HCC461_LUNG	4.37977
HCC515_LUNG	6.74306
INA6_HAEMATOPOIETIC_AND_LYMPHOID_TISSUE	3.79517
KD_SOFT_TISSUE	6.61502
KPMRTRY_SOFT_TISSUE	4.37499
MON_SOFT_TISSUE	4.96563
NCIH2004RT_SOFT_TISSUE	4.39815
NCIH2077_LUNG	4.64135
NCIH2882_LUNG	4.91055
NCIH2887_LUNG	2.98074
NCIH1819_LUNG	5.44116
NCIH3122_LUNG	3.5869
NHAHTDD_CENTRAL_NERVOUS_SYSTEM	3.76833
OCIMY5_HAEMATOPOIETIC_AND_LYMPHOID_TISSUE	4.04537
OCIMY7_HAEMATOPOIETIC_AND_LYMPHOID_TISSUE	3.91828
OPM1_HAEMATOPOIETIC_AND_LYMPHOID_TISSUE	5.24464
PC9_LUNG	4.34706
SKNEP1_BONE	5.02337
SKPNDW_BONE	3.78484
STM9101_SOFT_TISSUE	5.817
SIHA_CERVIX	4.78315
TM87_SOFT_TISSUE	4.95734
TTC709_SOFT_TISSUE	5.39634
TTC1240_SOFT_TISSUE	4.48
TTC549_SOFT_TISSUE	6.19188
TTC642_SOFT_TISSUE	4.86375
BT16_SOFT_TISSUE
CW9019_SOFT_TISSUE
D384_CENTRAL_NERVOUS_SYSTEM
D425_CENTRAL_NERVOUS_SYSTEM
D458_CENTRAL_NERVOUS_SYSTEM
D556_CENTRAL_NERVOUS_SYSTEM
JR_SOFT_TISSUE
MKL1_SKIN
MKL2_SKIN
PETA_SKIN
SMSCTR_SOFT_TISSUE
SUMB002_CENTRAL_NERVOUS_SYSTEM
201T_LUNG
451LU_NS
A388_SKIN
A431_SKIN
ACN
ALLPO_HAEMATOPOIETIC_AND_LYMPHOID_TISSUE
ARH77_HAEMATOPOIETIC_AND_LYMPHOID_TISSUE
ASH3_THYROID
ATN1_HAEMATOPOIETIC_AND_LYMPHOID_TISSUE
BALL1_HAEMATOPOIETIC_AND_LYMPHOID_TISSUE
BB30HNC_UPPER_AERODIGESTIVE_TRACT
BB49HNC_UPPER_AERODIGESTIVE_TRACT
BB65RCC_KIDNEY
BC1_HAEMATOPOIETIC_AND_LYMPHOID_TISSUE
BC3_HAEMATOPOIETIC_AND_LYMPHOID_TISSUE
BE13_HAEMATOPOIETIC_AND_LYMPHOID_TISSUE
BE2M17_AUTONOMIC_GANGLIA
BICR10_UPPER_AERODIGESTIVE_TRACT
BICR78_UPPER_AERODIGESTIVE_TRACT
BONNA12_HAEMATOPOIETIC_AND_LYMPHOID_TISSUE
BPH1_PROSTATE
C33A_CERVIX
C4I_CERVIX
CA922_UPPER_AERODIGESTIVE_TRACT
CAL39_VULVA
CAL72_BONE
CAR1_LARGE_INTESTINE
CASKI_CERVIX
CCRFCEM_HAEMATOPOIETIC_AND_LYMPHOID_TISSUE
CESS_HAEMATOPOIETIC_AND_LYMPHOID_TISSUE
CHP134_AUTONOMIC_GANGLIA
CHSA0011_BONE
CHSA0108_BONE
CHSA8926_BONE
COLO824_BREAST
CORL303_LUNG
CORL321_PLEURA
CORL32_LUNG
CP50MELB_SKIN
CP66MEL_SKIN
CP67MEL_SKIN
CROAP2_HAEMATOPOIETIC_AND_LYMPHOID_TISSUE
CROAP3
CS1_BONE
CTB1_HAEMATOPOIETIC_AND_LYMPHOID_TISSUE
CTV1_HAEMATOPOIETIC_AND_LYMPHOID_TISSUE
D245MG_CENTRAL_NERVOUS_SYSTEM
D247MG_CENTRAL_NERVOUS_SYSTEM
D263MG_CENTRAL_NERVOUS_SYSTEM
D336MG_CENTRAL_NERVOUS_SYSTEM
D392MG_CENTRAL_NERVOUS_SYSTEM
D423MG_CENTRAL_NERVOUS_SYSTEM
D502MG_CENTRAL_NERVOUS_SYSTEM
D542MG_CENTRAL_NERVOUS_SYSTEM
D566MG_CENTRAL_NERVOUS_SYSTEM
DG75_HAEMATOPOIETIC_AND_LYMPHOID_TISSUE
DIFI_LARGE_INTESTINE
DJM1_SKIN
DOK_UPPER_AERODIGESTIVE_TRACT
DOTC24510_CERVIX
DSH1_URINARY_TRACT
EB3_HAEMATOPOIETIC_AND_LYMPHOID_TISSUE
EGI1_BILIARY_TRACT
EMCBAC1_LUNG
EMCBAC2_LUNG
ES1_BONE
ES3_BONE
ES4_BONE
ES5_BONE
ES6_BONE
ES7_BONE
ES8_BONE
ESO26_OESOPHAGUS
ESO51_OESOPHAGUS
ETK1_BILIARY_TRACT
EW11_BONE
EW12_BONE
EW13_BONE
EW16_BONE
EW18_BONE
EW1_BONE
EW22_BONE
EW24_BONE
EW3_BONE
EW7_BONE
FARAGE_HAEMATOPOIETIC_AND_LYMPHOID_TISSUE
FLO1_OESOPHAGUS
GAK_SKIN
GEO_LARGE_INTESTINE
GIMEN_AUTONOMIC_GANGLIA
GMEL_SKIN
GOTO_AUTONOMIC_GANGLIA
GP5D_LARGE_INTESTINE
GRST_HAEMATOPOIETIC_AND_LYMPHOID_TISSUE
GT3TKB_STOMACH
H2369_PLEURA
NCIH2595_PLEURA
NCIH2722_PLEURA
NCIH2731_PLEURA
NCIH2795_PLEURA
NCIH2803_PLEURA
NCIH2804_PLEURA
NCIH2810_PLEURA
NCIH2818_PLEURA
NCIH2869_PLEURA
H290_PLEURA
H3118_UPPER_AERODIGESTIVE_TRACT
H9_HAEMATOPOIETIC_AND_LYMPHOID_TISSUE
HA7RCC_KIDNEY
HAL01_HAEMATOPOIETIC_AND_LYMPHOID_TISSUE
HC1_HAEMATOPOIETIC_AND_LYMPHOID_TISSUE
HCC2998_LARGE_INTESTINE
HCE4_OESOPHAGUS
HEC1_ENDOMETRIUM
HELA_CERVIX	5.54652
HEMCSS_BONE
HEY_OVARY
HMVII_SKIN
HO1N1_UPPER_AERODIGESTIVE_TRACT
HO1U1_UPPER_AERODIGESTIVE_TRACT
HS445_HAEMATOPOIETIC_AND_LYMPHOID_TISSUE
HSC39_STOMACH
HT3_CERVIX
HTCC3_THYROID
HUH6CLONE5
HUO3N1_BONE
HUO9_BONE
IHH4_THYROID
IM9_HAEMATOPOIETIC_AND_LYMPHOID_TISSUE
IMR5_AUTONOMIC_GANGLIA
ISTMEL1_SKIN
ISTSL1_LUNG
ISTSL2_LUNG
JAR_PLACENTA
JEG3_PLACENTA
JHOS3_OVARY
JHU011_UPPER_AERODIGESTIVE_TRACT
JHU022_UPPER_AERODIGESTIVE_TRACT
JHU029_UPPER_AERODIGESTIVE_TRACT
JIYOYEP2003_HAEMATOPOIETIC_AND_LYMPHOID_TISSUE
JSC1_HAEMATOPOIETIC_AND_LYMPHOID_TISSUE
K2_SKIN
K5_THYROID
KARPAS1106P_HAEMATOPOIETIC_AND_LYMPHOID_TISSUE
KARPAS231_HAEMATOPOIETIC_AND_LYMPHOID_TISSUE
KARPAS45_HAEMATOPOIETIC_AND_LYMPHOID_TISSUE
KGN_OVARY
KINGS1_CENTRAL_NERVOUS_SYSTEM
KMH2_THYROID
KMOE2_HAEMATOPOIETIC_AND_LYMPHOID_TISSUE
KNS81FD_CENTRAL_NERVOUS_SYSTEM
KON_UPPER_AERODIGESTIVE_TRACT
KOSC2_UPPER_AERODIGESTIVE_TRACT
KPNYS_AUTONOMIC_GANGLIA
KY821_HAEMATOPOIETIC_AND_LYMPHOID_TISSUE
KYAE1_OESOPHAGUS
KYSE220_OESOPHAGUS
KYSE50_OESOPHAGUS
LAN6_AUTONOMIC_GANGLIA
LB1047RCC_KIDNEY
LB2241RCC_KIDNEY
LB2518MEL_SKIN
LB373MELD_SKIN
LB647SCLC_LUNG
LB771HNC_UPPER_AERODIGESTIVE_TRACT
LB831BLC_URINARY_TRACT
LB996RCC_KIDNEY
LC2AD_LUNG
LC41_HAEMATOPOIETIC_AND_LYMPHOID_TISSUE
LIM1215_LARGE_INTESTINE
LN405_CENTRAL_NERVOUS_SYSTEM
LNZTA3WT4_CENTRAL_NERVOUS_SYSTEM
LU134A_LUNG
LU135_LUNG
LU139_LUNG
LU165_LUNG
M14_SKIN
MC1010_HAEMATOPOIETIC_AND_LYMPHOID_TISSUE
MCC13_SKIN
MCC26_SKIN
MCCAR_HAEMATOPOIETIC_AND_LYMPHOID_TISSUE
MCIXC_AUTONOMIC_GANGLIA
MDAMB330_BREAST
ME180_CERVIX
MFHINO_SOFT_TISSUE
MFM223_BREAST
MHHPREB1_HAEMATOPOIETIC_AND_LYMPHOID_TISSUE
MKN28_STOMACH
ML2_HAEMATOPOIETIC_AND_LYMPHOID_TISSUE
MLMA_HAEMATOPOIETIC_AND_LYMPHOID_TISSUE
MMACSF_SKIN
MN60_HAEMATOPOIETIC_AND_LYMPHOID_TISSUE
MOT_HAEMATOPOIETIC_AND_LYMPHOID_TISSUE
MRKNU1_BREAST
MS1_LUNG
MS751_CERVIX
MYM12_HAEMATOPOIETIC_AND_LYMPHOID_TISSUE
MZ1PC_PANCREAS
MZ2MEL_SKIN
MZ7MEL_SKIN
NB10_AUTONOMIC_GANGLIA
NB12_AUTONOMIC_GANGLIA
NB13_AUTONOMIC_GANGLIA
NB14_AUTONOMIC_GANGLIA
NB17_AUTONOMIC_GANGLIA
NB5_AUTONOMIC_GANGLIA
NB69_AUTONOMIC_GANGLIA
NB6_AUTONOMIC_GANGLIA
NB7_AUTONOMIC_GANGLIA
NBSUSSR_AUTONOMIC_GANGLIA
NBTU110_AUTONOMIC_GANGLIA
NCC010_KIDNEY
NCC021_KIDNEY
NCCIT_TESTIS
NCIH128_LUNG
NCIH1304_LUNG
NCIH1417_LUNG
NCIH1688_LUNG
NCIH1770_LUNG
NCIH187_LUNG
NCIH1993_LUNG
NCIH2135_LUNG
NCIH2373_PLEURA
NCIH2461_PLEURA
NCIH250_LUNG
NCIH2591_PLEURA
NCIH345_LUNG
NCIH378_LUNG
NCIH513_PLEURA
NCIH630_LARGE_INTESTINE
NCIH64_LUNG
NCIH720_LUNG
NCIH740_LUNG
NCIH748_LUNG
NCIH820_LUNG
NCIH835_LUNG
NCIH847_LUNG
NEC8_TESTIS
NH12_AUTONOMIC_GANGLIA
NK92MI_HAEMATOPOIETIC_AND_LYMPHOID_TISSUE
NKM1_HAEMATOPOIETIC_AND_LYMPHOID_TISSUE
NO10_CENTRAL_NERVOUS_SYSTEM
NO11_CENTRAL_NERVOUS_SYSTEM
NOS1_BONE
NTERA2CLD1_TESTIS
NY_BONE
OACM51_OESOPHAGUS
OACP4C_OESOPHAGUS
OCILY7_HAEMATOPOIETIC_AND_LYMPHOID_TISSUE
OCUBM_BREAST
OMC1_CERVIX
OSC19_UPPER_AERODIGESTIVE_TRACT
OSC20_UPPER_AERODIGESTIVE_TRACT
OV17R_OVARY
OVCA420_OVARY
OVCA433_OVARY
OVMIU_OVARY
P30OHK_HAEMATOPOIETIC_AND_LYMPHOID_TISSUE
P32ISH_HAEMATOPOIETIC_AND_LYMPHOID_TISSUE
PA1_OVARY
PC3JPC3_LUNG
PCI15A_UPPER_AERODIGESTIVE_TRACT
PCI30_UPPER_AERODIGESTIVE_TRACT
PCI38_UPPER_AERODIGESTIVE_TRACT
PCI4B_UPPER_AERODIGESTIVE_TRACT
PCI6A_UPPER_AERODIGESTIVE_TRACT
PEO1_OVARY
PFSK1_CENTRAL_NERVOUS_SYSTEM
PL18_PANCREAS
PL4_PANCREAS
PWR1E_PROSTATE
QIMRWIL_HAEMATOPOIETIC_AND_LYMPHOID_TISSUE
RAMOS2G64C10_HAEMATOPOIETIC_AND_LYMPHOID_TISSUE
RCCAB_KIDNEY
RCCER_KIDNEY
RCCFG2_KIDNEY
RCCJF_KIDNEY
RCCJW_KIDNEY
RCCMF_KIDNEY
RCK8_HAEMATOPOIETIC_AND_LYMPHOID_TISSUE
RERFLCFM_LUNG
RF48_STOMACH
RH1_SOFT_TISSUE
RO82W1_THYROID
ROS50_HAEMATOPOIETIC_AND_LYMPHOID_TISSUE
RPMI2650_UPPER_AERODIGESTIVE_TRACT
RPMI8866_HAEMATOPOIETIC_AND_LYMPHOID_TISSUE
RXF393_KIDNEY
SARC9371_BONE
SAS_UPPER_AERODIGESTIVE_TRACT
SAT_UPPER_AERODIGESTIVE_TRACT
SBC1_LUNG
SBC3_LUNG
SC1_HAEMATOPOIETIC_AND_LYMPHOID_TISSUE
SCC3_HAEMATOPOIETIC_AND_LYMPHOID_TISSUE
SCC90_UPPER_AERODIGESTIVE_TRACT
SCH_STOMACH
SISO_CERVIX
SKGIIIA_CERVIX
SKGT2_STOMACH
SKGT4_OESOPHAGUS
SKMG1_CENTRAL_NERVOUS_SYSTEM
SKN3_UPPER_AERODIGESTIVE_TRACT
SKN_URINARY_TRACT
SLVL_HAEMATOPOIETIC_AND_LYMPHOID_TISSUE
SN12C_KIDNEY
STS0421_SOFT_TISSUE
SUDHL16_HAEMATOPOIETIC_AND_LYMPHOID_TISSUE
SUPB8_HAEMATOPOIETIC_AND_LYMPHOID_TISSUE
SW13_ADRENAL_GLAND
SW626_OVARY
SW684_SOFT_TISSUE
SW756_CERVIX
SW872_SOFT_TISSUE
SW954_VULVA
SW962_VULVA
SW982_SOFT_TISSUE
TASK1_BONE
TCYIK_CERVIX
TE12_OESOPHAGUS
TGBC1TKB_BILIARY_TRACT
TGBC24TKB_BILIARY_TRACT
TGW_AUTONOMIC_GANGLIA
TK_HAEMATOPOIETIC_AND_LYMPHOID_TISSUE
TMK1_STOMACH
TUR_HAEMATOPOIETIC_AND_LYMPHOID_TISSUE
U698M_HAEMATOPOIETIC_AND_LYMPHOID_TISSUE
UCH2_BONE
UDSCC2_UPPER_AERODIGESTIVE_TRACT
UMC11_LUNG
UWB1289_OVARY
VAESBJ_SOFT_TISSUE
VAL_HAEMATOPOIETIC_AND_LYMPHOID_TISSUE
VMRCMELG_SKIN
WIL2NS_HAEMATOPOIETIC_AND_LYMPHOID_TISSUE
WM1552C_SKIN
WM278_SKIN
WM35_SKIN
WM793B_SKIN
WSUNHL_HAEMATOPOIETIC_AND_LYMPHOID_TISSUE
YMB1E_BREAST
YT_HAEMATOPOIETIC_AND_LYMPHOID_TISSUE

## Sheet: Table S3
Supplementary Table 3. LysoIP-MS identified proteins list
Protein IDs	Gene names	Protein names	Peptide counts (unique)	LFQ intensity Ctrl_1	LFQ intensity Ctrl_2	LFQ intensity Ctrl_3	LFQ intensity siTMEM9_1	LFQ intensity siTMEM9_2	LFQ intensity siTMEM9_3	Fold change Ctrl/siTMEM9	p-value
P05198;H0YJS4;G3V4T5	EIF2S1	Eukaryotic translation initiation factor 2 subunit 1	4	4914300	5154300	5666900	0	0	0	#DIV/0!	1.90117e-05		Table S1: List of all proteins that present in the proteomic dataset. Fold change referes to the change in prtoein abundance in lysosomal immunoprecipitates derived from cells with the indicated treatments compared to cells grown in full media (control). ND, indicates that no peptides were found for this protein in either the treatment or the control sample.
Q99805	TM9SF2	Transmembrane 9 superfamily member 2	3	4630600	4115800	3918200	0	0	0	#DIV/0!	3.77656e-05
P63261;P60709;I3L3I0;I3L1U9;A0A2R8Y793;Q6S8J3;P0CG38;A5A3E0;A0A2R8YFE2;I3L4N8;P0CG39;Q9BYX7;A0A2R8YEA7	ACTG1;ACTB	Actin, cytoplasmic 2;Actin, cytoplasmic 2, N-terminally processed;Actin, cytoplasmic 1;Actin, cytoplasmic 1, N-terminally processed	23	883850000	856250000	858410000	475230000	518650000	530800000	1.7043	4.7274e-05
Q969Q0;H0Y5B4;H7BZ11;J3KQN4;P83881;R4GN19	RPL36AL;RPL36A;RPL36A-HNRNPH2	60S ribosomal protein L36a-like;60S ribosomal protein L36a	12	9480500	9036900	12111000	0	0	0	#DIV/0!	0.000441477
P36542-2;P36542	ATP5C1	ATP synthase subunit gamma, mitochondrial	10	10692000	15044000	12340000	0	0	0	#DIV/0!	0.000560946
Q9UKM7;H0YGV7;H0YG20	MAN1B1	Endoplasmic reticulum mannosyl-oligosaccharide 1,2-alpha-mannosidase;alpha-1,2-Mannosidase	13	5990000	4905700	4235700	0	0	0	#DIV/0!	0.000591578
O15031	PLXNB2	Plexin-B2	4	2191300	3047100	2157800	0	0	0	#DIV/0!	0.00106399
O00139-2;O00139-1;O00139-5;O00139;O00139-4;A0A669KBE9;H0Y8H2;D6R9M0	KIF2A	Kinesin-like protein KIF2A	13	1548800	1011100	1457200	0	0	0	#DIV/0!	0.00128537
Q709C8-3;Q709C8;Q709C8-4;Q709C8-2;A0A3B3IU50;A0A3B3IT88	VPS13C	Vacuolar protein sorting-associated protein 13C	58	9553400	11025000	14569000	29428000	23621000	29334000	0.426634	0.00292213
P25686;C9JRD2;C9JXB9;P25686-2;C9J1G2;E7ETU0;C9JX00	DNAJB2	DnaJ homolog subfamily B member 2	12	2876800	1933000	3667300	0	0	0	#DIV/0!	0.00487527
A0A087WV46;C9JXA7;Q0VGL1;A0A087WT92	LAMTOR4	Ragulator complex protein LAMTOR4;Ragulator complex protein LAMTOR4, N-terminally processed	7	67200000	41244000	37525000	0	0	0	#DIV/0!	0.00645865
Q96I99;E9PDQ8;Q96I99-2;H0Y852	SUCLG2	Succinyl-CoA ligase [GDP-forming] subunit beta, mitochondrial	8	4758500	3820400	3462100	0	1844800	0	6.52699	0.00945185
P15529-2;P15529-6;P15529-5;P15529-3;P15529-4;P15529-7;P15529-12;P15529-14;P15529-8;P15529-16;P15529-11;P15529-13;P15529-9;P15529-15;P15529-10;P15529;R4GN18	CD46	Membrane cofactor protein	55	6581600	8042100	7161000	4346900	4577900	2523200	1.90293	0.011345
P07305;P07305-2	H1F0	Histone H1.0;Histone H1.0, N-terminally processed	9	203460000	107940000	159090000	39736000	40556000	28359000	4.33029	0.0123822
Q15365	PCBP1	Poly(rC)-binding protein 1	3	45713000	36633000	33325000	12091000	0	18616000	3.76693	0.0126824
A0A0D9SGE8;Q8IWS0-5;Q8IWS0-3;Q8IWS0;Q5JRC6;Q8IWS0-4;Q8IWS0-2	PHF6	PHD finger protein 6	37	89160000	53472000	75396000	0	23927000	25853000	4.37983	0.0135438
Q15233-2;Q15233;H7C367;C9JYS8;C9IZL7;C9J4X2	NONO	Non-POU domain-containing octamer-binding protein	29	13794000	10276000	19463000	0	4888900	0	8.90446	0.0147189
P56945-3;P56945;P56945-8;A0A2R8Y4C2;P56945-6;P56945-7;P56945-5;P56945-2;A0A2R8Y8C4;A0A2R8Y596;A0A2R8YFS8;A0A2R8Y5C9;P56945-4;A0A2R8Y6M6;A0A2R8YFK2;A0A2R8Y5E4;H3BN62;H3BQJ7;H3BVF0;H3BSB2;H3BSY4;H3BTB0;H3BU42;Q14511-3;Q14511-2;Q14511;H3BTL5	BCAR1	Breast cancer anti-estrogen resistance protein 1	203	54638000	57618000	48503000	100100000	80948000	75910000	0.625624	0.0149866
P11717	IGF2R	Cation-independent mannose-6-phosphate receptor	12	10702000	8753600	12374000	3766900	6282600	2085100	2.62304	0.0150288
Q9UBR2	CTSZ	Cathepsin Z	4	20930000	25012000	28136000	8268100	15459000	5178800	2.56273	0.0151112
H0Y9V9;A0A2R8Y5Y7;P32969;E7ESE0;D6RAN4;H0Y9R4	RPL9	60S ribosomal protein L9	14	11741000	11396000	4417700	0	0	0	#DIV/0!	0.0183024
P05556-2;P05556;P05556-5;P05556-4;P05556-3;C9JPK5;Q5T3E6;E9PLR6;E7EUI6;E7EQW5	ITGB1	Integrin beta-1	20	8018500	4253000	3559700	0	0	0	#DIV/0!	0.0189488
Q8TBA6;Q8TBA6-2;H0YK03	GOLGA5	Golgin subfamily A member 5	9	3900700	1390600	3237100	0	0	0	#DIV/0!	0.0193416
P38159-2;P38159;H0Y6E7;H3BT71;H3BUY5;H3BNC1;H3BR27;P38159-3;Q96E39;A0A1B0GUK8;Q8IZ40	RBMX	RNA-binding motif protein, X chromosome;RNA-binding motif protein, X chromosome, N-terminally processed	35	34488000	23539000	36142000	0	17423000	0	5.40487	0.0219447
P62424;Q5T8U3;Q5T8U2	RPL7A	60S ribosomal protein L7a	17	26790000	19636000	19983000	0	12871000	6304500	3.46322	0.0229568
P08238;Q58FF7;Q58FF8	HSP90AB1	Heat shock protein HSP 90-beta	11	39296000	39884000	41935000	56798000	48165000	63255000	0.719988	0.0241593
Q02252;Q02252-2;G3V4Z4	ALDH6A1	Methylmalonate-semialdehyde dehydrogenase [acylating], mitochondrial	20	28041000	32499000	24317000	41180000	44175000	35708000	0.700933	0.024394
H0YEP5;P17405-3;P17405-2;P17405-4;P17405;E9PL59;G3V1E1;E9PQT3	SMPD1	Sphingomyelin phosphodiesterase	13	4570500	4158300	4275200	0	2930100	0	4.43807	0.0269956
A0A0A6YYC7;Q96JP5-2;Q96JP5;H3BTR0	ZFP91-CNTF;ZFP91	E3 ubiquitin-protein ligase ZFP91	11	35531000	21236000	34205000	16106000	560090	9349300	3.49685	0.0277984
P49327;A0A0U1RQF0;A0A0U1RRG3	FASN	Fatty acid synthase;[Acyl-carrier-protein] S-acetyltransferase;[Acyl-carrier-protein] S-malonyltransferase;3-oxoacyl-[acyl-carrier-protein] synthase;3-oxoacyl-[acyl-carrier-protein] reductase;3-hydroxyacyl-[acyl-carrier-protein] dehydratase;Enoyl-[acyl-carrier-protein] reductase;Oleoyl-[acyl-carrier-protein] hydrolase	31	15121000	18174000	12708000	37230000	22783000	30617000	0.507591	0.0290603
Q96FH0;K7ENY0;Q96FH0-2	MEF2BNB	Protein MEF2BNB	7	1640100	5872100	6269700	0	0	0	#DIV/0!	0.0361816
Q15363;F5GX39;E7EQ72	TMED2	Transmembrane emp24 domain-containing protein 2	7	9253400	12590000	26344000	0	0	0	#DIV/0!	0.0372535
O14745;J3QRP6;O14745-2	SLC9A3R1	Na(+)/H(+) exchange regulatory cofactor NHE-RF1	10	8205300	7561000	5852500	9854700	10061000	8881800	0.750718	0.0388991
Q7L576;A0A0G2JR96;A0A0G2JQT1;E7EW33;H7C229;E7EVJ5;Q7L576-3;Q7L576-2;Q96F07-2;Q96F07;H0YL50	CYFIP1;CYFIP2	Cytoplasmic FMR1-interacting protein 1;Cytoplasmic FMR1-interacting protein 2	22	3683100	2635700	4588100	0	2372500	0	4.59722	0.0428767
P08621-2;P08621;M0QYR1;P08621-3;P08621-4	SNRNP70	U1 small nuclear ribonucleoprotein 70 kDa	14	4916900	3624400	6678600	0	3172200	0	4.7979	0.04358
P13667;A0A499FI48	PDIA4	Protein disulfide-isomerase A4	27	20832000	19474000	20231000	25254000	28583000	36803000	0.667884	0.0439113
Q9Y624;Q9Y624-2;A0A087WY82	F11R	Junctional adhesion molecule A	12	14219000	10160000	9666200	0	7919000	0	4.29918	0.0443326
Q969X5-2;Q969X5;F2Z3Q5;F2Z2U2;Q969X5-3	ERGIC1	Endoplasmic reticulum-Golgi intermediate compartment protein 1	18	54056000	35637000	30151000	0	24383000	7643700	3.742	0.0455194
Q4G0F5	VPS26B	Vacuolar protein sorting-associated protein 26B	2	3784200	2735200	5753500	0	2289300	0	5.36098	0.0464726
P22307-6;P22307-2;P22307-4;P22307-7;P22307-8;P22307;H0YF61	SCP2	Non-specific lipid-transfer protein	26	27532000	14702000	12798000	0	5673000	6354000	4.5757	0.0468306
Q9UL25	RAB21	Ras-related protein Rab-21	4	10231000	8879700	8578100	0	5737500	5492800	2.46554	0.0474992
Q9H444	CHMP4B	Charged multivesicular body protein 4b	3	24694000	7248700	12122000	0	0	0	#DIV/0!	0.0475213
P51572;P51572-2;A0A2R8Y5M6;C9JMD7;C9JSP1;C9JQ75;C9J0M4;C9JM14	BCAP31	B-cell receptor-associated protein 31	23	9431400	18965000	36247000	0	0	0	#DIV/0!	0.0516047
B8ZZL8;P61604;S4R3N1;B8ZZ54	HSPE1;HSPE1-MOB4	10 kDa heat shock protein, mitochondrial	15	110460000	110760000	98572000	126300000	122940000	151880000	0.797248	0.0531988
C9JI87;P21796	VDAC1	Voltage-dependent anion-selective channel protein 1	8	192770000	95120000	97525000	323040000	187500000	282840000	0.485789	0.0574628
I3L0N3;P46459-2;P46459	NSF	Vesicle-fusing ATPase	21	11058000	11553000	9459000	18412000	12511000	15191000	0.69545	0.0617563
P62269;A0A0G2JQH2;Q5GGW2	RPS18	40S ribosomal protein S18	5	5028400	5713500	7449000	26229000	11574000	14754000	0.346118	0.0639286
P21333-2;P21333;Q60FE5;A0A087WWY3;F8WE98;H0Y5F3;Q14315-2;Q14315;H0Y5C6;A0A669KBC6	FLNA	Filamin-A	181	132390000	104390000	91099000	200450000	131610000	173180000	0.648957	0.0650839
P57735	RAB25	Ras-related protein Rab-25	5	26029000	19087000	16926000	48616000	30880000	31245000	0.560244	0.0659753
P19474;P19474-2;H0YDP8	TRIM21	E3 ubiquitin-protein ligase TRIM21	33	113330000	253690000	95889000	236420000	345880000	405630000	0.468565	0.0676593
Q8IWB7;C9JJ54;A0A494C0A6	WDFY1	WD repeat and FYVE domain-containing protein 1	16	11618000	7922800	12023000	0	8496700	0	3.71483	0.0692547
A0A590UJK4;A0A590UK01;A0A590UJP7;A0A590UK80;Q13247-3;Q13247;A0A0D9SEM4;Q08170;B4DJK0;B4DUA4;Q13243-3;Q13243	SRSF6;SRSF4	Serine/arginine-rich splicing factor 6;Serine/arginine-rich splicing factor 4	26	4930200	9768800	8817000	0	4764400	3634200	2.79999	0.0710097
Q08380;K7EP36;K7ESM3;K7EKQ5;K7EQT9;K7ES75;K7EN99;K7ERZ6;K7EJY8;K7EJD3	LGALS3BP	Galectin-3-binding protein	19	5903000	6923200	0	70692000	29542000	22865000	0.104194	0.0717631
J3KTA4;P17844-2;P17844;J3QSF1;J3KRZ1;J3QRQ7;J3QR02;J3KRX8;J3KTQ4;A0A0U1RQJ0;X6RLV5	DDX5	Probable ATP-dependent RNA helicase DDX5	32	30788000	40949000	22466000	0	14809000	20363000	2.67835	0.0718744
A0A0C4DFZ2;P15289-2;P15289	ARSA	Arylsulfatase A;Arylsulfatase A component B;Arylsulfatase A component C	18	36454000	32115000	22170000	0	24305000	0	3.73335	0.0725102
Q9NWB6;Q9NWB6-3;Q9NWB6-2	ARGLU1	Arginine and glutamate-rich protein 1	7	5800100	17023000	32405000	0	0	0	#DIV/0!	0.075389
G3V2V8;J3KMY5;G3V3E8;E7EMS2;G3V3D1;P61916-2;P61916;H0YIZ1	NPC2	Epididymal secretory protein E1	23	129310000	31087000	24708000	355610000	323210000	106530000	0.235697	0.078661
A0A1W2PQY5;Q08379-2;Q08379;A0A087WYC0	GOLGA2	Golgin subfamily A member 2	10	3692900	2724100	5847500	0	2885700	0	4.2501	0.078943
P49411	TUFM	Elongation factor Tu, mitochondrial	9	42543000	35342000	58431000	7797300	26655000	31801000	2.0575	0.0795308
B1AJQ6;Q86Y82	STX12	Syntaxin-12	8	55119000	14782000	26588000	0	8528900	2738000	8.56394	0.0809654
P60174;P60174-3;P60174-4;U3KPZ0	TPI1	Triosephosphate isomerase	12	18793000	6906400	13577000	0	6133700	5601500	3.34689	0.0812927
P09497-2;P09497;H0Y9Q6;D6RJD1	CLTB	Clathrin light chain B	12	6479600	3324900	8728100	0	4128400	0	4.48905	0.0827345
P51148;P51148-2;F8VVZ0;F8VUA5;F8VVK3;K7ERI8;K7ERQ8;F8VWU4;K7ENY4;K7EIP6;F8WCY6;F8WD79;F8VPW9;F8VSF8;F8VWZ7	RAB5C;RAB5B	Ras-related protein Rab-5C	3	18405000	4800900	11694000	16921000	24945000	28098000	0.498827	0.0856537
A0A087X0X3;P52272-2;P52272;M0QZM1;M0R2I7;M0R019;M0R2T0;M0QY96;M0QYQ7;M0R0N3;M0R0Y6;M0QYL3	HNRNPM	Heterogeneous nuclear ribonucleoprotein M	98	88914000	74257000	82791000	73400000	70639000	56983000	1.22356	0.0863999
O60506-4;O60506-3;O60506-2;O60506;F6UXX1;B7Z645;O60506-5	SYNCRIP	Heterogeneous nuclear ribonucleoprotein Q	11	6461400	9922100	12607000	7528000	2458900	0	2.90285	0.0897059
B5MDF5;J3KQE5;P62826;H0YFC6;F5H018;B4DV51	RAN	GTP-binding nuclear protein Ran	19	1686300	5639900	7299200	8707200	12033000	7864800	0.511288	0.0902257
Q13148;A0A087WX29;Q13148-4;A0A087WYY0;A0A087X260;G3V162;B1AKP7;K7EN94;A0A0A0N0M3;A0A1W2PNU8;A0A087WTZ4;K7EL26;K7EJM5;A0A087WXQ5;A0A087WXV3;A0A087WX67;A0A087WW61;A0A087WZC9;A0A087WYE7;A0A087WV68	TARDBP	TAR DNA-binding protein 43	29	7954400	3363600	9452500	0	4725700	0	4.39522	0.0912422
D6RD47;P62266;D6RDJ2;D6RIX0;D6R9I7	RPS23	40S ribosomal protein S23	12	12109000	6441300	10337000	0	8120900	0	3.55715	0.0952868
Q1KMD3;H3BQZ7	HNRNPUL2;HNRNPUL2-BSCL2	Heterogeneous nuclear ribonucleoprotein U-like protein 2	11	3260800	5371000	10504000	0	3388600	0	5.64711	0.0968128
Q9BTU6;E9PAM4	PI4K2A	Phosphatidylinositol 4-kinase type 2-alpha	9	17120000	8701100	11331000	4427900	7208600	8002000	1.8918	0.0977435
P49207	RPL34	60S ribosomal protein L34	4	16838000	18420000	11497000	10888000	0	9768800	2.26342	0.0977777
P13284	IFI30	Gamma-interferon-inducible lysosomal thiol reductase	1	79564000	46266000	73900000	0	49464000	34704000	2.37299	0.0978857
P07686;Q5URX0;H0YA83;H0Y9B6;D6REQ8	HEXB	Beta-hexosaminidase subunit beta;Beta-hexosaminidase subunit beta chain B;Beta-hexosaminidase subunit beta chain A	31	278170000	303090000	184330000	497630000	310420000	379860000	0.644485	0.0981383
M0QXM4;Q15758;Q15758-3;Q15758-2;M0QX44	SLC1A5	Amino acid transporter;Neutral amino acid transporter B(0)	11	4238300	5927900	15875000	0	2225200	0	11.7029	0.0988028
O94886;X6RI56	TMEM63A	CSC1-like protein 1	7	33638000	39987000	9460800	5383900	12788000	1675600	4.18621	0.099243
P48735;P48735-2;H0YL11	IDH2	Isocitrate dehydrogenase [NADP], mitochondrial	11	3250300	3384200	4065700	0	3368800	0	3.17626	0.10097
Q9BYG3;H7BZL0;C9J808	NIFK	MKI67 FHA domain-interacting nucleolar phosphoprotein	6	8700400	4592400	9635700	0	6364700	0	3.60245	0.103434
Q9HB40;I3L4Z9;Q9HB40-2;I3L506;I3L4Z3	SCPEP1	Retinoid-inducible serine carboxypeptidase	10	111900000	62052000	83722000	129000000	103040000	150950000	0.672796	0.104988
P06748-3;P06748-2;P06748;E5RGW4	NPM1	Nucleophosmin	14	52605000	31905000	84032000	0	34289000	21530000	3.01944	0.107328
Q96FQ6	S100A16	Protein S100-A16	4	71594000	51227000	72383000	0	46461000	45091000	2.13217	0.108283
O43707;O43707-2;F5GXS2;O43707-3;H7C144;K7EJH8;K7EP19	ACTN4	Alpha-actinin-4	38	13307000	26624000	24748000	0	16992000	8082300	2.57949	0.109471
P17050	NAGA	Alpha-N-acetylgalactosaminidase	5	32245000	80735000	33163000	246160000	84635000	127580000	0.318828	0.110283
P19367-4;P19367-2;P19367;P19367-3;Q2TB90	HK1	Hexokinase-1	17	5606300	4956000	3565000	0	4079100	2057900	2.30199	0.114292
G3XAL0;P40926;P40926-2	MDH2	Malate dehydrogenase;Malate dehydrogenase, mitochondrial	19	43937000	56584000	77575000	0	33085000	44811000	2.28633	0.114853
Q9Y3Q3;G3V1J9;F5H4M7;Q9Y3Q3-2	TMED3	Transmembrane emp24 domain-containing protein 3	5	7771800	5377100	6692100	0	6389900	0	3.10506	0.11586
A0A5K1VW72;J3QRD1;A0A5F9ZHI5;A0A5F9ZHN9;P51648;P51648-2;J3QKK9;J3QS00;J3KTG1;I3L1M4;I3L0X1;A0A5F9ZHZ9;A0A5F9ZI12;A0A5F9ZGX4	ALDH3A2	Fatty aldehyde dehydrogenase	20	0	1933800	1939200	0	0	0	#DIV/0!	0.116117
P31150;G5E9U5;Q5SX91;Q5SX87;P50395-2;P50395	GDI1;GDI2	Rab GDP dissociation inhibitor alpha;Rab GDP dissociation inhibitor beta	7	0	4521600	4540600	0	0	0	#DIV/0!	0.116118
A0A0G2JLD8;E7EUY5;Q04837;C9K0U8	SSBP1	Single-stranded DNA-binding protein, mitochondrial	11	0	8155500	8066300	0	0	0	#DIV/0!	0.116129
Q16698-2;Q16698;H0YAW3;E5RJD2;E5RJG7;E5RFV2	DECR1	2,4-dienoyl-CoA reductase, mitochondrial	8	0	2983200	3017100	0	0	0	#DIV/0!	0.116129
B3KQV6;P30153;E9PH38;C9J9C1	PPP2R1A	Serine/threonine-protein phosphatase 2A 65 kDa regulatory subunit A alpha isoform	9	0	0	0	0	3108900	3181800	0	0.11617
E9PJD9;E9PLL6;P46776;E9PLX7	RPL27A	60S ribosomal protein L27a	10	0	13917000	13450000	0	0	0	#DIV/0!	0.116232
Q96N66;Q96N66-2;Q96N66-3	MBOAT7	Lysophospholipid acyltransferase 7	5	0	7112000	6804700	0	0	0	#DIV/0!	0.11631
P49189;P49189-3	ALDH9A1	4-trimethylaminobutyraldehyde dehydrogenase	4	0	1871900	1979000	0	0	0	#DIV/0!	0.116424
O60763;O60763-2	USO1	General vesicular transport factor p115	4	0	1401900	1482400	0	0	0	#DIV/0!	0.116426
A0A3B3IRW9;Q6P4E1-2;Q6P4E1-5;Q6P4E1;H0YMR0;H0YM51	CASC4	Protein CASC4	10	0	2131100	2012700	0	0	0	#DIV/0!	0.116441
P61981	YWHAG	14-3-3 protein gamma;14-3-3 protein gamma, N-terminally processed	2	0	1650700	1765800	0	0	0	#DIV/0!	0.116568
B4DUR8;P49368-2;P49368	CCT3	T-complex protein 1 subunit gamma	9	0	3804300	4100900	0	0	0	#DIV/0!	0.116676
Q8NCL4;S4R3S5	GALNT6	Polypeptide N-acetylgalactosaminyltransferase 6	4	0	3490900	3765400	0	0	0	#DIV/0!	0.116685
P04920-2;P04920-3;P04920;C9JVC2;C9J722;C9J035;C9J9M9	SLC4A2	Anion exchange protein 2	10	0	3723500	4017800	0	0	0	#DIV/0!	0.116691
D6RBT3;O75380	NDUFS6	NADH dehydrogenase [ubiquinone] iron-sulfur protein 6, mitochondrial	4	4331300	0	4724200	0	0	0	#DIV/0!	0.116865
A0A087WU65;A0A2R8YE10;A0A2R8YD95;Q9NRW7-2;Q9NRW7;A0A2R8YF01;A0A1B0GXI6;A0A2R8YEX8	VPS45	Vacuolar protein sorting-associated protein 45	20	0	3428600	3755400	0	0	0	#DIV/0!	0.116939
Q96HJ9-2;A0A0A6YYJ8;Q9Y383-3;Q9Y383-2;Q9Y383	LUC7L2	Putative RNA-binding protein Luc7-like 2	20	20536000	20588000	36353000	0	19990000	10760000	2.51958	0.117036
P30084	ECHS1	Enoyl-CoA hydratase, mitochondrial	2	0	7005200	6321500	0	0	0	#DIV/0!	0.117162
Q9NVI7-3;Q9NVI7-2;Q5T9A4;A0A5K1VW56;Q5T9A4-3;Q9NVI7;H0Y2W2;Q5T9A4-2	ATAD3A;ATAD3B	ATPase family AAA domain-containing protein 3A;ATPase family AAA domain-containing protein 3B	17	0	6400200	5767600	0	0	0	#DIV/0!	0.117191
A0A087WWU8;D6R904;P06753-4;P06753-2;P06753-5;P06753-6;P06753-3;Q5VU61;A0A494C0G0;A0A0S2Z4G6;CON__Q3SX28;A7XZE4;H0YL80;Q5TCU3;J3KN67;A0A2R8YHD2;Q6ZN40;H0YKP3;A0A2R8YH90;A0A494C0P6;A0A2R2Y2Q3;H0YKX5;A0A2R8YGX3;A0A2R8YEU4;P09493-4;P09493-2;P09493;P09493-9;A0A2R8Y5V9;P09493-10;P09493-3;P09493-8;P09493-7;P07951;P07951-2;P09493-6;P06753;P07951-3	TPM3	Tropomyosin alpha-3 chain	32	0	3080700	2749500	0	0	0	#DIV/0!	0.117399
H0YDN9;A0A0D9SF70;G5E9L0;Q8N6H7-3;Q8N6H7-2;Q8N6H7;E9PMU9;E9PQP3;E9PIY6	ARFGAP2	ADP-ribosylation factor GTPase-activating protein 2	15	0	1508500	1695800	0	0	0	#DIV/0!	0.117474
P63000;P63000-2;P60763;P15153;J3KSC4;J3QLK0;B1AH77;B1AH78;B1AH80	RAC1;RAC3;RAC2	Ras-related C3 botulinum toxin substrate 1;Ras-related C3 botulinum toxin substrate 3;Ras-related C3 botulinum toxin substrate 2	22	0	17127000	15228000	0	0	0	#DIV/0!	0.117485
K7EM09;K7EPR0;K7ELQ9;Q6UW68	TMEM205	Transmembrane protein 205	4	0	9347800	8207600	0	0	0	#DIV/0!	0.117792
P07910;G3V2Q1;G3V4C1;B2R5W2;P07910-2;B4DY08;G3V4W0;G3V576;P07910-4;G3V575;G3V555;P07910-3;G3V5V7;G3V2D6;G3V4M8;G3V2H6;G3V251;G3V3K6;G3V5X6;B4DSU6;O60812;P0DMR1;B7ZW38;B2RXH8;A0A0G2JNQ3;A0A0G2JPF8;E5RG71;B3KT61;Q86SE5-3;Q86SE5	HNRNPC	Heterogeneous nuclear ribonucleoproteins C1/C2	117	30908000	31355000	43580000	27226000	26574000	27258000	1.30577	0.11783
P31040-2;P31040;A0A087X1I3;D6RFM5;P31040-3;H0Y8X1;A0A494C1T6	SDHA	Succinate dehydrogenase [ubiquinone] flavoprotein subunit, mitochondrial	29	0	5616200	6423600	0	0	0	#DIV/0!	0.117902
P26641;P26641-2	EEF1G	Elongation factor 1-gamma	4	0	0	0	0	5679000	6520000	0	0.118004
P62906	RPL10A	60S ribosomal protein L10a	3	0	17096000	14819000	0	0	0	#DIV/0!	0.118137
Q9BVK6	TMED9	Transmembrane emp24 domain-containing protein 9	2	28256000	0	24476000	0	0	0	#DIV/0!	0.118156
Q9Y265;Q9Y265-2;E7ETR0	RUVBL1	RuvB-like 1	7	0	2633300	3043700	0	0	0	#DIV/0!	0.118191
O75531;E9PJJ8	BANF1	Barrier-to-autointegration factor;Barrier-to-autointegration factor, N-terminally processed	3	0	12208000	10540000	0	0	0	#DIV/0!	0.118251
Q14789-4;Q14789-3;Q14789;Q14789-2;E7EU81;H0Y867	GOLGB1	Golgin subfamily B member 1	15	0	1865600	2161600	0	0	0	#DIV/0!	0.118261
Q13151	HNRNPA0	Heterogeneous nuclear ribonucleoprotein A0	2	2513000	0	2914400	0	0	0	#DIV/0!	0.118288
P46060;B0QYT5;B0QYT4;H0Y4Q3	RANGAP1	Ran GTPase-activating protein 1	5	0	2221200	2591000	0	0	0	#DIV/0!	0.11846
P14868-2;P14868;C9J7S3;C9JLC1;H7BZ35;C9JQM9;H7C278	DARS	Aspartate--tRNA ligase, cytoplasmic	16	0	0	0	0	2294000	1950300	0	0.118718
E9PCY5;Q02880-2;Q02880	TOP2B	DNA topoisomerase 2;DNA topoisomerase 2-beta	6	0	1353100	1596600	0	0	0	#DIV/0!	0.11882
P49748-2;P49748;P49748-3;K7EJW8;J3QRJ8;K7EQP4;G3V1M7;K7EMF8;J3KS89;J3KSR4	ACADVL	Very long-chain specific acyl-CoA dehydrogenase, mitochondrial	26	0	4229000	5080900	0	0	0	#DIV/0!	0.119436
Q9BS26	ERP44	Endoplasmic reticulum resident protein 44	2	0	2937500	2433700	0	0	0	#DIV/0!	0.119604
H0Y9X1;Q96EY4;D6RA57;D6RE67;D6RC31	TMA16	Translation machinery-associated protein 16	10	5650200	0	4666300	0	0	0	#DIV/0!	0.119722
A0A0J9YWF7;A0A1B0GTY9;A0A1B0GUA1;A0A1B0GTG2;A0A1B0GW82;A0A1B0GW77;P49419-4;P49419-2;P49419;F8WDY6;H0YHM6;A0A1B0GUY0;A0A1B0GVU0;F8VVF2;A0A1B0GV49;A0A1B0GTJ4	ALDH7A1	Alpha-aminoadipic semialdehyde dehydrogenase	37	0	2604800	3185300	0	0	0	#DIV/0!	0.120099
P51809-3;P51809;P51809-2	VAMP7	Vesicle-associated membrane protein 7	12	51128000	32623000	38030000	91943000	58003000	52052000	0.602882	0.120404
P43304;P43304-2;F5GYK7	GPD2	Glycerol-3-phosphate dehydrogenase, mitochondrial;Glycerol-3-phosphate dehydrogenase	5	0	1960500	1586900	0	0	0	#DIV/0!	0.12051
P54802	NAGLU	Alpha-N-acetylglucosaminidase;Alpha-N-acetylglucosaminidase 82 kDa form;Alpha-N-acetylglucosaminidase 77 kDa form	6	31191000	15132000	11855000	0	11707000	5983700	3.28862	0.120709
O60264;A0A0A0MRP6;B7ZLQ5;P28370-2;P28370	SMARCA5	SWI/SNF-related matrix-associated actin-dependent regulator of chromatin subfamily A member 5	7	0	1791400	1442400	0	0	0	#DIV/0!	0.120729
P04843;B7Z4L4;F8WF32	RPN1	Dolichyl-diphosphooligosaccharide--protein glycosyltransferase subunit 1	17	15628000	22359000	29836000	84591000	39883000	37149000	0.419637	0.120943
Q92820	GGH	Gamma-glutamyl hydrolase	7	148870000	239220000	42125000	5696400	47298000	34087000	4.94038	0.121148
P62745	RHOB	Rho-related GTP-binding protein RhoB	4	0	9651600	7692700	0	0	0	#DIV/0!	0.121166
Q13286;Q13286-3;Q13286-7;Q13286-2;Q13286-6;Q13286-4;A0A1B0GWD3;A0A1B0GV41;A0A1B0GV71;A0A1B0GW34;H3BQ48;A0A0D9SFH9;O95090;O95086;B4DFF3;Q2TA70;H3BPL0;A0A1B0GWH8;F6TI76;Q9UBD8;H3BMN4;H3BR00;A0A1B0GUX3;Q9UP10;Q9UBH5;A0A0D9SF04;Q13286-5;H3BR84	CLN3	Battenin	41	0	3846200	4923300	0	0	0	#DIV/0!	0.122082
E9PIE4;Q9Y6C9	MTCH2	Mitochondrial carrier homolog 2	4	0	0	0	0	3744000	4835200	0	0.122511
A0A2R8YD40;A0A2R8YDJ9;Q14839-2;A0A0C4DGG9;Q14839;A0A2R8Y521;A0A2R8Y212;F5GWX5;A0A2R8YFD8;A0A2R8Y425;A0A2U3TZM0;A0A2R8YDW2;A0A2R8Y4X2;A0A2R8YFK9;A0A2R8Y5J0;A0A2R8Y445;A0A2R8Y5Z7;A0A2R8YER1;A0A2R8Y7I0;A0A2R8Y8C1;A0A2R8YE38;A0A2R8Y5M9;A0A2R8Y685;A0A5F9ZHX5;A0A2R8Y8B3;K7EMY3;A0A2R8Y7M9;Q12873-2;Q12873;Q8TDI0;Q12873-3	CHD4	Chromodomain-helicase-DNA-binding protein 4	66	0	2701400	2079800	0	0	0	#DIV/0!	0.122796
Q9Y5B9	SUPT16H	FACT complex subunit SPT16	4	0	3927700	5115000	0	0	0	#DIV/0!	0.122928
Q5VZY9;O15075-2;O15075	DCLK1	Serine/threonine-protein kinase DCLK1	6	0	810340	1058500	0	0	0	#DIV/0!	0.123083
P10909-4;P10909-6;P10909;P10909-5;P10909-2;H0YAS8;P10909-3;E5RG36;E5RGB0;E5RH61;E5RJZ5;E7ERK6;E7ETB4;H0YC35;H0YLK8	CLU	Clusterin;Clusterin beta chain;Clusterin alpha chain	27	0	0	0	0	2286000	2986400	0	0.123088
H0Y5E8;Q9NR31-2;Q9NR31	SAR1A	GTP-binding protein SAR1a	12	0	25159000	27097000	1194200	0	0	43.7582	0.123205
P19338;H7BY16;C9JYW2;C9JLB1;C9J1H7;C9JWL1	NCL	Nucleolin	22	13994000	9152400	15676000	0	11134000	5704200	2.30561	0.123287
K7EJE8;K7EKE6;P36776-3;P36776-2;P36776	LONP1	Lon protease homolog, mitochondrial	10	0	1215700	1595800	0	0	0	#DIV/0!	0.123336
Q07065	CKAP4	Cytoskeleton-associated protein 4	2	1457100	0	1918900	0	0	0	#DIV/0!	0.123506
P50416-2;P50416	CPT1A	Carnitine O-palmitoyltransferase 1, liver isoform	4	0	1073800	1433600	0	0	0	#DIV/0!	0.124242
F8VPF3;F8W1R7;J3KND3;G8JLA2;G3V1V0;B7Z6Z4;P60660-2;P60660;F8W1I5;P14649;H0YI43;F8VZU9;G3V1Y7;F8W180	MYL6;MYL6B	Myosin light polypeptide 6;Myosin light chain 6B	32	0	0	0	0	11929000	8932300	0	0.124259
Q14344;Q14344-2	GNA13	Guanine nucleotide-binding protein subunit alpha-13	5	10284000	5918400	4009400	1589600	4914000	0	3.10779	0.124294
O14818-2;O14818;H0Y586;A0A087WYS6;Q8TAA3-2;Q8TAA3-5;Q8TAA3	PSMA7;PSMA8	Proteasome subunit alpha type-7;Proteasome subunit alpha type-7-like	9	0	0	0	0	3320800	4451300	0	0.124463
S4R3Q6;O75436-2;O75436	VPS26A	Vacuolar protein sorting-associated protein 26A	9	0	4603900	3431300	0	0	0	#DIV/0!	0.124518
O43390;O43390-2;O43390-3;O43390-4;B4DT28	HNRNPR	Heterogeneous nuclear ribonucleoprotein R	6	3081800	0	4158400	0	0	0	#DIV/0!	0.124836
Q9H3K2	GHITM	Growth hormone-inducible transmembrane protein	2	0	2355100	3185000	0	0	0	#DIV/0!	0.124965
A0A494C050;Q5M9Q1;Q8N5F7	NKAPL;NKAP	NKAP-like protein;NF-kappa-B-activating protein	6	0	1654000	2246200	0	0	0	#DIV/0!	0.125205
O00264-2;O00264	PGRMC1	Membrane-associated progesterone receptor component 1	4	0	4422500	6012200	0	0	0	#DIV/0!	0.125266
P53007;B4DP62	SLC25A1	Tricarboxylate transport protein, mitochondrial	6	24262000	14669000	23830000	0	20017000	0	3.13538	0.125318
G3V126;Q9UI12-2;Q9UI12	ATP6V1H	V-type proton ATPase subunit H	9	7414800	2646400	2956700	0	2695100	0	4.83021	0.125866
B4DY09;Q12905	ILF2	Interleukin enhancer-binding factor 2	4	0	4527100	3268900	0	0	0	#DIV/0!	0.126372
A0A024RAC6;Q14241	TCEB3	Transcription elongation factor B polypeptide 3	4	0	1194600	1670300	0	0	0	#DIV/0!	0.126966
P50454;E9PKH2;E9PR70;E9PPV6;E9PQ34;E9PJH8;E9PIG2;E9PRS3;E9PNX1;E9PK86;E9PMI5	SERPINH1	Serpin H1	16	0	4011100	5613200	0	0	0	#DIV/0!	0.12702
G3V5S9;G3V1S4;Q9Y324;G3V2M5	FCF1	rRNA-processing protein FCF1 homolog	7	0	4629200	6522300	0	0	0	#DIV/0!	0.127451
E9PNK6;E9PPQ1;J3KNE7;Q16890-5;Q16890;Q16890-4;Q16890-3;Q16890-2	TPD52L1	Tumor protein D53	13	0	0	0	0	4605100	6505300	0	0.127619
Q02083-2;Q02083;R4GNC0;B4DVL2;H0Y988;Q02083-3;D6R9S9	NAAA	N-acylethanolamine-hydrolyzing acid amidase;N-acylethanolamine-hydrolyzing acid amidase subunit alpha;N-acylethanolamine-hydrolyzing acid amidase subunit beta	19	0	7888100	11160000	0	0	0	#DIV/0!	0.127718
M0R0F0;M0R0R2;P46782;M0QZN2	RPS5	40S ribosomal protein S5;40S ribosomal protein S5, N-terminally processed	17	17960000	6478100	11731000	0	6249900	6986000	2.73265	0.127911
A0A1B0GWD6;A0A1B0GVI9;A0A1B0GVC7;B7Z1I9;B7Z413;A0A1B0GTB0;A0A1B0GTU8;A0A1B0GUT7;A0A1B0GVW0;O75787-2;O75787;A0A1B0GWJ8;H7C3E1;A0A1B0GU12;A0A1B0GVB9;A0A1C7CYW4	ATP6AP2	Renin receptor	27	0	0	0	0	16007000	22887000	0	0.128411
Q92896;Q92896-3;Q92896-2;H3BM42	GLG1	Golgi apparatus protein 1	22	2496900	2515500	6098400	1581700	1897600	0	3.1934	0.129109
O60313-10;O60313-11;A0A2R8Y3X5;E5KLJ9;A0A2R8YDM2;C9JMB8;A0A2R8YE78;O60313-2;O60313;O60313-9;O60313-13;A0A2R8YGE5;A0A2R8YFD1;A0A2R8YD53;A0A2R8Y4Q3;A0A2R8Y4G4;A0A2R8YE54;H7C141	OPA1	Dynamin-like 120 kDa protein, mitochondrial;Dynamin-like 120 kDa protein, form S1	60	1804600	3268500	2045400	0	2195400	0	3.24246	0.129269
F5H6I7;Q6DD88	ATL3	Atlastin-3	4	0	4721400	3258600	0	0	0	#DIV/0!	0.129307
G8JLQ3;P78537-2;P78537;F8W099;F8W606;A0A087WSV2;F8W036;F8VP73	BLOC1S1	Biogenesis of lysosome-related organelles complex 1 subunit 1	11	0	12384000	8545100	0	0	0	#DIV/0!	0.129323
P00505-2;P00505	GOT2	Aspartate aminotransferase, mitochondrial	14	21584000	16097000	17440000	21316000	21706000	28661000	0.768955	0.129854
P51688;I3NI22;I3L4B7	SGSH	N-sulphoglucosamine sulphohydrolase	5	0	5747000	8406500	0	0	0	#DIV/0!	0.129967
Q86WC4;A0A0A0MSP4	OSTM1	Osteopetrosis-associated transmembrane protein 1	3	0	4506400	3062900	0	0	0	#DIV/0!	0.130377
Q9BSJ8-2;Q9BSJ8;F8VZB1	ESYT1	Extended synaptotagmin-1	7	0	2748900	4051100	0	0	0	#DIV/0!	0.130494
X6RLJ0;P02745	C1QA	Complement C1q subcomponent subunit A	4	0	22061000	14798000	0	0	0	#DIV/0!	0.131326
P07954-2;P07954	FH	Fumarate hydratase, mitochondrial	6	0	11001000	7370500	0	0	0	#DIV/0!	0.131412
H0YLU7;P13804;H0YKF0;P13804-2;H0YK49;H0YL12;H0YNX6;J3KN60;H0YL83	ETFA	Electron transfer flavoprotein subunit alpha, mitochondrial	29	8589400	11470000	9634200	0	8971500	5218300	2.0926	0.131733
P31946-2;P31946;Q4VY20;Q4VY19;A0A0J9YWE8;A0A0J9YWZ2	YWHAB	14-3-3 protein beta/alpha;14-3-3 protein beta/alpha, N-terminally processed	8	0	6718300	10199000	0	0	0	#DIV/0!	0.132675
P00973-4;P00973-2;P00973;P00973-3;H0YI20;H0YIB8	OAS1	2-5-oligoadenylate synthase 1	20	0	0	0	0	12240000	18621000	0	0.132836
Q5THR1;Q9H5Z1-2;Q9H5Z1	DHX35	Probable ATP-dependent RNA helicase DHX35	6	0	3292800	2131900	0	0	0	#DIV/0!	0.134004
P13010	XRCC5	X-ray repair cross-complementing protein 5	5	0	4174400	6449300	0	0	0	#DIV/0!	0.134026
P18859-2;P18859;A8MUH2	ATP5J	ATP synthase-coupling factor 6, mitochondrial	5	0	0	0	0	2576800	4017000	0	0.134735
P61956-2;P61956;A8MUA9;A8MU27;Q6EEV6;P55854;P55854-2	SUMO2;SUMO3;SUMO4	Small ubiquitin-related modifier 2;Small ubiquitin-related modifier 4;Small ubiquitin-related modifier 3	9	0	8011300	12527000	0	0	0	#DIV/0!	0.134978
Q92504;A2AAT0	SLC39A7	Zinc transporter SLC39A7	3	2301400	2859400	6990500	0	2574300	0	4.72023	0.135281
P42704;C9JCA9;B8ZZ38;A0A0C4DG06	LRPPRC	Leucine-rich PPR motif-containing protein, mitochondrial	18	6581600	5187900	5710500	10957000	8565800	6109700	0.681947	0.135629
A0A0U1RR30;A0A0U1RRM1;Q8WXI9;Q86YP4-2;Q86YP4;Q86YP4-3	GATAD2B;GATAD2A	Transcriptional repressor p66-beta;Transcriptional repressor p66-alpha	9	0	863890	1366300	0	0	0	#DIV/0!	0.135898
Q5JR95;P62241	RPS8	40S ribosomal protein S8	6	0	1651700	2641800	0	0	0	#DIV/0!	0.136823
E7ENN3;A0A0C4DG40;Q8NF91-4;Q8NF91;Q8NF91-8;Q8NF91-2;F5H422;A0A5F9ZHD7;F5H4Q0;A0A5F9ZHR3;F5GXQ8;A0A5F9ZI52;Q8NF91-5;Q8NF91-6;Q8NF91-10;Q8NF91-7	SYNE1	Nesprin-1	26	0	39945000	24699000	0	0	0	#DIV/0!	0.137753
P18085;C9JPM4;C9JAK5;U3KQF2	ARF4	ADP-ribosylation factor 4	10	21560000	10675000	7963000	0	10292000	0	3.90575	0.137969
O75165;A0A3B3IRM0	DNAJC13	DnaJ homolog subfamily C member 13	6	0	3006900	1849500	0	0	0	#DIV/0!	0.138199
P22455-3;P22455;H0Y9P2;J3KPQ0;P22455-2	FGFR4	Fibroblast growth factor receptor 4;Receptor protein-tyrosine kinase	7	0	2874300	4674700	0	0	0	#DIV/0!	0.13823
P28799-2;P28799;K7EMR1;K7EKL3;K7EQ05;P28799-3	GRN	Granulins;Acrogranin;Paragranulin;Granulin-1;Granulin-2;Granulin-3;Granulin-4;Granulin-5;Granulin-6;Granulin-7	8	57850000	17838000	17137000	0	13942000	0	6.65794	0.138457
P53597;A0A494C0D1;H7C233	SUCLG1	Succinyl-CoA ligase [ADP/GDP-forming] subunit alpha, mitochondrial	8	0	4768300	7807900	0	0	0	#DIV/0!	0.138813
A0A0A0MR02;P45880-2;P45880;P45880-1;Q5JSD2;Q5JSD1;A2A3S1	VDAC2	Voltage-dependent anion-selective channel protein 2	44	102200000	80876000	62555000	277480000	127850000	125230000	0.462966	0.139535
Q9UEU0;Q9UEU0-2;H0YJL5;J3KMW2;G3V5I2;H0YJJ5	VTI1B	Vesicle transport through interaction with t-SNAREs homolog 1B	12	3481800	7427800	13116000	0	0	5534200	4.3413	0.139604
P27348;E9PG15	YWHAQ	14-3-3 protein theta	6	0	0	0	0	6359200	3797400	0	0.14078
A0A0C4DG83;A2VCS9;E7ETZ8;Q49MG5-2;Q49MG5;A8MSM7	MAP9	Microtubule-associated protein 9	11	0	1140100	1911000	0	0	0	#DIV/0!	0.140862
H0YIZ0;P34897-3;P34897-2;P34897;G3V2Y4;G3V5L0	SHMT2	Serine hydroxymethyltransferase;Serine hydroxymethyltransferase, mitochondrial	29	16355000	14368000	12923000	7793000	9726600	14260000	1.3734	0.14093
Q86UP2-2;Q86UP2-4;Q86UP2;Q86UP2-3;G3V4Y7;G3V5G2;H0YJZ8;G3V5P0;B7Z6P3	KTN1	Kinectin	55	17171000	18975000	28076000	13655000	16862000	0	2.10447	0.14291
P55060-4;P55060-3;P55060	CSE1L	Exportin-2	6	0	1021800	1764500	0	0	0	#DIV/0!	0.143573
A0A0J9YWY6;A0A6I8PIX7;O95425-2;O95425-4;O95425-3;O95425	SVIL	Supervillin	12	0	0	0	0	1571200	2720700	0	0.143829
Q15643;Q15643-2;H0YJ97	TRIP11	Thyroid receptor-interacting protein 11	11	0	4571800	7979500	0	0	0	#DIV/0!	0.144569
A6NNI4;A0A2R8Y478;G8JLH6;P21926;A0A087WU13	CD9	Tetraspanin;CD9 antigen	9	0	26853000	15232000	0	0	0	#DIV/0!	0.145516
Q07666-2;Q07666;Q5VWX1;Q07666-3	KHDRBS1	KH domain-containing, RNA-binding, signal transduction-associated protein 1	8	0	6363900	11300000	0	0	0	#DIV/0!	0.146201
Q8N9Q2	SREK1IP1	Protein SREK1IP1	2	8326500	2494000	16674000	0	4093400	0	6.71679	0.146352
P54803;A0A087WX10;P54803-5;P54803-4;G3V255;P54803-3;G3V4M2;G3V5E8;H0YJG8	GALC	Galactocerebrosidase	28	17811000	19516000	13058000	0	13248000	12057000	1.99111	0.146722
F8VTQ5;F8W6I7;P09651-3;P09651-2;P09651;F8VYN5;F8W646;F8VZ49;A0A2R8Y4L2;Q32P51	HNRNPA1;HNRNPA1L2	Heterogeneous nuclear ribonucleoprotein A1;Heterogeneous nuclear ribonucleoprotein A1, N-terminally processed;Heterogeneous nuclear ribonucleoprotein A1-like 2	21	10220000	36757000	32593000	0	21267000	0	3.74148	0.148304
C9JPX5;C9JKL2;O95772-2;O95772;C9JJ39;C9J3F5	STARD3NL	MLN64 N-terminal domain homolog	10	0	1441400	2630700	0	0	0	#DIV/0!	0.148876
O75643;A0A494C1A5	SNRNP200	U5 small nuclear ribonucleoprotein 200 kDa helicase	5	0	1610900	2952800	0	0	0	#DIV/0!	0.149304
A0A087X054;A0A494C039;Q9Y4L1;E9PJ21;A0A087WWI4;K7EQK2;Q9Y4L1-2;J3QL06;J3KTF1;A0A087X214;A0A087WW13;Q9BST8;J3QQH7;J3QLE9	HYOU1	Hypoxia up-regulated protein 1	45	7059700	10455000	15302000	0	9529400	3745500	2.47209	0.149808
Q8NFV4;Q8NFV4-6;Q8NFV4-4;H0YC52;C9J7Q4;H7BZ58;Q8NFV4-3;Q8NFV4-2;H7C396;Q8NFV4-5	ABHD11	Alpha/beta hydrolase domain-containing protein 11	22	13955000	5975500	6510700	0	7407700	0	3.56942	0.149986
Q9Y4W6	AFG3L2	AFG3-like protein 2	2	4015500	2151100	0	0	0	0	#DIV/0!	0.151128
E9PF16;Q96CM8-3;Q96CM8;Q96CM8-2;Q96CM8-4;D6RF87	ACSF2	Acyl-CoA synthetase family member 2, mitochondrial	15	0	4383000	8231500	0	0	0	#DIV/0!	0.151741
O95716;P20336;M0R257;S4R3Q3;P20337;Q96E17	RAB3D;RAB3A	Ras-related protein Rab-3D;Ras-related protein Rab-3A	4	0	0	0	0	8914300	16745000	0	0.151762
P08574	CYC1	Cytochrome c1, heme protein, mitochondrial	3	0	5432800	2884600	0	0	0	#DIV/0!	0.152029
P60953;A0A590UJK8;P60953-1;A0A3B3IRV0;F8WET9;B1AH79;A0A494C1M1;Q5JYX0;G3V4H1;A0A494BZX6;G3V476;Q9H4E5-2;P17081;Q9H4E5	CDC42	Cell division control protein 42 homolog	4	0	7989400	15053000	0	0	0	#DIV/0!	0.152069
H9KV75;P12814-2;P12814;P12814-3;P12814-4;H0YJ11;H0YJW3;H7C5W8	ACTN1	Alpha-actinin-1	14	0	2777700	1464700	0	0	0	#DIV/0!	0.152734
A0A087WY61;Q14980-2;Q14980;Q14980-4;Q14980-3;H0YFY6;Q14980-5;F5H4J1;F5H6Y5;K4DIE0;F5H1L0;F5GZW1;F5H2F3;F5H3L6;F5H0Z7;F5H763	NUMA1	Nuclear mitotic apparatus protein 1	102	11548000	11307000	29206000	0	11335000	4974000	3.19216	0.153338
Q9Y5A9;A0A024R7W5;A0A087X0Q1;A0A087WY31;Q9Y5A9-2;Q7Z739;S4R3J8;S4R3V3;Q9BYJ9	YTHDF2;YTHDF3	YTH domain-containing family protein 2;YTH domain-containing family protein 3	16	0	2465100	4703300	0	0	0	#DIV/0!	0.153356
G3V4F7;P61011-2;P61011	SRP54	Signal recognition particle 54 kDa protein	6	0	1901700	3648500	0	0	0	#DIV/0!	0.153928
O95292	VAPB	Vesicle-associated membrane protein-associated protein B/C	3	4565100	2961600	4069700	0	4055300	0	2.85957	0.154149
A0A669KAW1;Q9BYC5-2;Q9BYC5	FUT8	Alpha-(1,6)-fucosyltransferase	6	0	1346100	2602000	0	0	0	#DIV/0!	0.154706
O75976;J3QQJ4;O75976-2	CPD	Carboxypeptidase D	4	0	0	0	0	3541500	6854400	0	0.154839
Q8IZQ5;A0A087WYP2;H0YE28	SELH;C11orf31	Selenoprotein H	5	9584100	8008600	6138000	0	6997000	4724900	2.02448	0.155224
H3BPE7;P35637-2;P35637	FUS	RNA-binding protein FUS	6	0	6028900	11769000	0	0	0	#DIV/0!	0.155734
Q9Y2X3;H7BZ72	NOP58	Nucleolar protein 58	5	0	4922000	9702000	0	0	0	#DIV/0!	0.156758
A0A096LNZ9;A0A096LPJ4;P05161	ISG15	Ubiquitin-like protein ISG15	6	2275600	876750	1607900	0	24906000	38752000	0.0747785	0.158583
H0YD16;A0A0A0MSK5;J3KN66;Q5JTV8;Q5JTV8-3;H0YDU3;H0Y4R4	TOR1AIP1	Torsin-1A-interacting protein 1	12	0	1012400	2039800	0	0	0	#DIV/0!	0.159093
Q5W111-2;Q5W111	SPRYD7	SPRY domain-containing protein 7	4	1203300	2152100	4427300	0	1010700	1375900	3.261	0.159185
H0Y4X3;Q14498-3;Q14498-2;Q14498;A0A0U1RQH7;G3XAC6;A0A0U1RQW2;A0A087X122	RBM39	RNA-binding protein 39	29	49636000	19372000	7070200	0	8893300	0	8.55455	0.159795
Q86T03-2;Q86T03;G3V5T5	TMEM55B	Type 1 phosphatidylinositol 4,5-bisphosphate 4-phosphatase	8	0	4678700	9499500	0	0	0	#DIV/0!	0.159922
H7C2U6;Q9BPW8;C9JDV8;F8WCR5	NIPSNAP1	Protein NipSnap homolog 1	6	0	4666400	2293300	0	0	0	#DIV/0!	0.160157
Q9P0L0;Q9P0L0-2	VAPA	Vesicle-associated membrane protein-associated protein A	10	33124000	10708000	57984000	0	21416000	1668900	4.4105	0.161182
P25311;C9JEV0	AZGP1	Zinc-alpha-2-glycoprotein	8	14504000	22086000	30188000	0	19181000	10716000	2.2336	0.161245
O15400-2;O15400	STX7	Syntaxin-7	8	13003000	8744400	5624200	0	8768300	0	3.12165	0.16201
A0A590UJL0;P08842;A0A590UJY9;A0A590UJT4	STS	Steryl-sulfatase	22	46728000	32331000	43227000	0	31813000	31756000	1.92367	0.162486
P29372-5;P29372-4;P29372-2;P29372;A2IDA3	MPG	DNA-3-methyladenine glycosylase	29	10949000	11698000	10235000	0	9475200	8180000	1.86245	0.165503
H0YLP6;H0YMF4;H0YKD8;P46779-4;P46779-5;P46779;P46779-2;P46779-3	RPL28	60S ribosomal protein L28	16	0	5816500	12442000	0	0	0	#DIV/0!	0.165647
P14866;M0QXS5;A0A3B3ITJ4;P14866-2;M0QYL7;M0R1W6;B4DVF8;M0QYT0	HNRNPL	Heterogeneous nuclear ribonucleoprotein L	22	11119000	13169000	20333000	0	9971500	11553000	2.07303	0.167296
Q15029-2;Q15029-3;Q15029;K7EJ74;K7EP67	EFTUD2	116 kDa U5 small nuclear ribonucleoprotein component	8	0	2364400	1084800	0	0	0	#DIV/0!	0.167746
P63173;J3KSP2;J3KT73;J3QL01	RPL38	60S ribosomal protein L38	5	0	18401000	8375700	0	0	0	#DIV/0!	0.168641
Q15075	EEA1	Early endosome antigen 1	12	6494700	11298000	12854000	0	7440000	7459600	2.05688	0.169401
P46777;A0A2R8Y6J3;Q5T7N0	RPL5	60S ribosomal protein L5	7	0	2225700	4969000	0	0	0	#DIV/0!	0.170462
Q9UM47	NOTCH3	Neurogenic locus notch homolog protein 3;Notch 3 extracellular truncation;Notch 3 intracellular domain	2	394670	219770	1667800	0	0	0	#DIV/0!	0.170821
P30044-2;P30044;P30044-4;P30044-3	PRDX5	Peroxiredoxin-5, mitochondrial	10	0	9682300	4294500	0	0	0	#DIV/0!	0.17158
P31942-3;P31942-2;P31942;P31942-4	HNRNPH3	Heterogeneous nuclear ribonucleoprotein H3	7	0	3257500	7410100	0	0	0	#DIV/0!	0.1726
H3BRG4;P22695;H3BSJ9;H3BP04;A0A087WVZ4;H3BUE4;H3BUI9	UQCRC2	Cytochrome b-c1 complex subunit 2, mitochondrial	26	13468000	24630000	5485000	0	10816000	0	4.02949	0.174305
O95197-3;O95197-4;O95197-7;O95197-2;O95197	RTN3	Reticulon-3	5	0	12629000	5452600	0	0	0	#DIV/0!	0.17467
O95782-2;O95782;A0A0G2JQM1;A0A0G2JS82;O94973-3;O94973;O94973-2	AP2A1	AP-2 complex subunit alpha-1	33	2509500	4631000	17824000	0	1246600	0	20.0261	0.17549
J3QRV5;Q6P1M3;Q6P1M3-2;Q6P1M3-3;J3KRE1;J3QLV4;J3QRZ8;J3QL58;J3QSA6	LLGL2	Lethal(2) giant larvae protein homolog 2	30	13866000	20409000	20650000	0	20105000	0	2.73191	0.175545
A9Z1X7;Q8IYB3-2;Q8IYB3;M0R088;E9PCT1	SRRM1	Serine/arginine repetitive matrix protein 1	23	8607600	7125000	7970800	0	8956900	0	2.64638	0.178516
P07858;R4GMQ5;E9PR54;E9PJ67;E9PCB3;E9PKQ7;E9PNL5;E9PHZ5;E9PLY3;E9PSG5;E9PQM1	CTSB	Cathepsin B;Cathepsin B light chain;Cathepsin B heavy chain	17	383000000	193520000	187550000	0	176750000	168060000	2.21592	0.180215
H7C2L4;P62995-3;P62995;H7BXF3	TRA2B	Transformer-2 protein homolog beta	7	0	4940100	12023000	0	0	0	#DIV/0!	0.18042
B5MCK8;A6NGU5;P19440;E7ET76;P36268-2;P36268;P36268-3;E7ETR7;B5MC36;A0A0C4DG87;B5MC34;A0A494C1J8;Q14390;P19440-3;B5MD39;P19440-2	GGT2;GGT3P;GGT1	Putative gamma-glutamyltranspeptidase 3;Putative gamma-glutamyltranspeptidase 3 heavy chain;Putative gamma-glutamyltranspeptidase 3 light chain;Gamma-glutamyltranspeptidase 1;Gamma-glutamyltranspeptidase 1 heavy chain;Gamma-glutamyltranspeptidase 1 light chain;Inactive gamma-glutamyltranspeptidase 2	26	0	3153100	1283700	0	0	0	#DIV/0!	0.181497
Q96P11-2;Q96P11-5;Q96P11;Q96P11-4;Q63ZY6-5;Q63ZY6;Q63ZY6-4;Q3KNT7-2;Q3KNT7-3;Q3KNT7;Q63ZY6-6;Q96P11-3;Q63ZY6-2	NSUN5;NSUN5P2	Probable 28S rRNA (cytosine-C(5))-methyltransferase;Putative methyltransferase NSUN5C	51	17496000	16345000	9605100	0	14149000	6181100	2.13703	0.182102
X6R2L4;Q9Y230;M0QXI6;M0R0Y3;Q9Y230-2;M0R0Z0;A0A1W2PS48	RUVBL2	RuvB-like 2	14	0	0	0	11181000	0	4513000	0	0.182506
P07355;P07355-2;H0YN42;H0YMU9;H0YMD0;A6NMY6;H0YKS4;H0YM50;H0YNP5;H0YMM1;H0YMT9;H0YKX9;H0YLV6;H0YKZ7;H0YN28;H0YL33;H0YMW4;H0YKL9;H0YKV8;H0YNB8;H0YNA0;H0YKN4;H0YMD9;H0YN52;H0YLE2	ANXA2;ANXA2P2	Annexin A2;Annexin;Putative annexin A2-like protein	164	55239000	12705000	50224000	140610000	61744000	59592000	0.451116	0.183555
B7Z7D2;E9PQY3;P11117;A0A5F9ZHR7;E9PHY0;A0A5F9ZH82	ACP2	Lysosomal acid phosphatase	23	15454000	18666000	41956000	10022000	15630000	9133500	2.187	0.184533
E9PB51;Q9BWF3-4;Q9BQ04;Q9BWF3;E9PLB0;E9PM61;D6R9K7;U3KQD5;J3QRR5;Q9BWF3-3;Q9BWF3-2	RBM4;RBM4B	RNA-binding protein 4;RNA-binding protein 4B	15	0	2355600	924560	0	0	0	#DIV/0!	0.185795
Q00839;A0A1W2PRZ7;A0A1W2PQ74;A0A1W2PQL0;A0A1W2PP34;A0A1W2PPL4;A0A1W2PPH7;Q5RI18;A0A1W2PP35;A0A1X7SBS1;A0A1W2PPS1;Q00839-2;A0A1W2PQD4;A0A1W2PPE9	HNRNPU	Heterogeneous nuclear ribonucleoprotein U	66	33762000	24610000	37939000	0	36078000	0	2.66952	0.187769
Q8NBX0	SCCPDH	Saccharopine dehydrogenase-like oxidoreductase	3	0	4459400	1717500	0	0	0	#DIV/0!	0.188026
P62263;A0A2R8Y811;E5RH77	RPS14	40S ribosomal protein S14	7	15881000	9734000	11746000	16064000	17302000	13838000	0.79148	0.188802
Q8J015;M0QYS1;P40429;Q6NVV1	RPL13a;RPL13A;RPL13AP3	60S ribosomal protein L13a;Putative 60S ribosomal protein L13a protein RPL13AP3	14	10502000	7109700	9023200	0	0	10109000	2.63477	0.191618
Q13242;H0YIB4;S4R3G0	SRSF9	Serine/arginine-rich splicing factor 9	9	4304100	4879100	12006000	0	6100800	0	3.47318	0.191657
P11940;E7ERJ7;E7EQV3;P11940-2;A0A087WTT1;H0YAR2;Q9H361;Q13310-3;B1ANR0;H0Y5F5;H0YB75;H0YAS6;H0YAS7;Q13310-2;Q13310;H0YBN4;A0A6I8PS38;A0A6I8PLA1;H0YAW6;H0YCC8;H0YEU6;H0YAP2;H0YB86;Q4VXU2;H0YC10	PABPC1;PABPC3	Polyadenylate-binding protein 1;Polyadenylate-binding protein;Polyadenylate-binding protein 3	55	0	6143100	2165500	0	0	0	#DIV/0!	0.198502
Q9ULV0;A0A087WY00;G3V394;F8WE88;F8W6H6;Q9Y4I1-2;Q9Y4I1;Q9Y4I1-3;Q9NQX4;H0YM93;H0YMK3;Q9NQX4-2	MYO5B	Unconventional myosin-Vb	46	54892000	65188000	66896000	111430000	60116000	85605000	0.727106	0.20056
A0A2C9F2P4;A0A286YFF7;P50897;Q5T0S4;A0A286YFE3;A0A286YFL8;P50897-2;A0A286YFL6;E9PIA8;E9PSE5;E9PK48	PPT1	Palmitoyl-protein thioesterase 1	59	216110000	322830000	97829000	0	136690000	137380000	2.32338	0.20264
P11387;E5RJ95;E5RFS0;E5RIC7;Q969P6-2;Q969P6;E5RJ33;H0YBR3;H0YC03;E5RGE7;E5RGR4;E5RFE3;E5RGR2	TOP1	DNA topoisomerase 1	28	10226000	18141000	19102000	0	15390000	8114300	2.01959	0.203449
P62879;C9JZN1;C9JIS1;C9JXA5;E7EP32;Q9HAV0;C9JD14;B1AKQ8;F5H8J8;F5H100;F5H0S8;E9PCP0;P62879-2;P16520-2;P16520;H7C5J5	GNB2;GNB4	Guanine nucleotide-binding protein G(I)/G(S)/G(T) subunit beta-2;Guanine nucleotide-binding protein subunit beta-4	14	9205800	55418000	11553000	33984000	63211000	59011000	0.487669	0.203775
A0A3B3IUC4;P06280;A0A669KAY7;A0A669KB83;A0A3B3IRU3;V9GYN5	GLA	Alpha-galactosidase A	20	105310000	87315000	75695000	8052300	67858000	82664000	1.69208	0.207877
Q96PK6;A0A0A6YYI9;F8WDX3;A0A0A0MSL8;B8ZZ74;Q96PK6-3;Q96PK6-4;Q96PK6-2;Q96PK6-5	RBM14	RNA-binding protein 14	17	5058500	10695000	11944000	0	6400200	7269200	2.02624	0.208397
D6R991;D6REM6;A0A0R4J2E8;A8MXP9;P43243;H0Y8T4;D6RAM9;D6RAY2;D6RBI2;D6RE02;D6RIA2;B3KM87;P43243-2	MATR3	Matrin-3	45	5027800	6983700	17152000	4333400	5162100	2394100	2.45286	0.208758
G3V1P3;Q969J3;Q969J3-2	LOH12CR1	Loss of heterozygosity 12 chromosomal region 1 protein	11	12193000	6431500	9322200	0	10654000	0	2.62312	0.215532
P37108;H0YLA2	SRP14	Signal recognition particle 14 kDa protein	11	158430000	108910000	85673000	370280000	118540000	202300000	0.510784	0.217425
Q8IV48;E5RIV7	ERI1	3-5 exoribonuclease 1	4	0	4650100	4184300	0	1823800	0	4.84395	0.217608
P51571;A6NLM8	SSR4	Translocon-associated protein subunit delta	4	0	6975500	3309100	0	1262400	0	8.14686	0.217732
P07814;V9GYZ6	EPRS	Bifunctional glutamate/proline--tRNA ligase;Glutamate--tRNA ligase;Proline--tRNA ligase	6	0	3719800	5144700	0	1709600	0	5.18513	0.218651
B5MCF9;O00541-2;O00541;B3KXD6;H7C267	PES1	Pescadillo homolog	24	8591300	8152900	13684000	0	8644100	7587400	1.87464	0.219086
C9JTK4;C9JGT8;C9JJ47;A0A087WY71;E9PFW3;Q96CW1-2;Q96CW1;C9JJD3;C9JPV8	AP2M1	AP-2 complex subunit mu	16	6889500	5648300	6886100	12186000	5755200	9864400	0.698561	0.22031
Q14244-3;Q14244;A0A087WZ40;Q14244-5;Q14244-2;Q14244-6;Q14244-7;Q14244-4	MAP7	Ensconsin	73	14914000	28580000	42665000	20303000	17588000	11720000	1.73669	0.220678
A0A087WUW5;A0A0D9SF20;A6NLN1;A0A0U1RRM4;P26599;P26599-2;P26599-3;K7ELW5;K7EK45;O95758-7;O95758-1;O95758-6;O95758-2;O95758;O95758-5;O95758-4	PTBP1	Polypyrimidine tract-binding protein 1	30	22154000	10760000	19477000	12416000	12933000	12045000	1.40105	0.220861
P11413;P11413-2;P11413-3;E7EUI8;E7EM57;E9PD92	G6PD	Glucose-6-phosphate 1-dehydrogenase	56	40224000	28624000	31376000	102600000	42268000	43101000	0.533194	0.222654
H3BMH2;H3BSC1;P62491-2;Q15907-2;P62491;Q15907;B4DQU5;M0R377;M0R2D0;H3BN38	RAB11A;RAB11B	Ras-related protein Rab-11A;Ras-related protein Rab-11B	41	149230000	163170000	153270000	145390000	200640000	243580000	0.789793	0.223677
Q9H0S4;Q9H0S4-2;F5H1N9	DDX47	Probable ATP-dependent RNA helicase DDX47	5	0	1726600	485310	0	0	0	#DIV/0!	0.224837
A0A0C4DGE4;A0A286YF28;A0A0J9YW33;Q13277-2;Q13277-3;Q13277	STX3	Syntaxin-3	18	12966000	4448300	5583700	0	7381100	0	3.1158	0.224954
Q8NCC3;Q8NCC3-2;B4DPU0;H3BMU8;H3BM47;B4DJW4;H3BPT3	PLA2G15	Group XV phospholipase A2	14	4189700	0	7589600	3231500	11166000	14353000	0.409708	0.227173
P43155-3;P43155-2;P43155;B7ZBP5;A6PVN3	CRAT	Carnitine O-acetyltransferase	16	0	4183600	5469200	0	2026800	0	4.76258	0.227297
A0A1B0GW44;A0A1B0GV23;A0A1B0GVD5;A0A1B0GWE8;P07339;A0A1B0GVP3;H7C1V0;H7C469;A0A1B0GU92;A0A1B0GU03;F8WD96;C9JH19;F8W787	CTSD	Cathepsin D;Cathepsin D light chain;Cathepsin D heavy chain	65	581340000	433760000	274000000	1073500000	505340000	566990000	0.600747	0.227813
H7C123;H7C2C5;F8W7C6;A0A087WV22;X1WI28;Q96L21;P27635;B8A6G2;A6QRI9	RPL10;RPL10L	60S ribosomal protein L10-like;60S ribosomal protein L10	23	24235000	0	12380000	0	5677900	0	6.44869	0.227881
P52597	HNRNPF	Heterogeneous nuclear ribonucleoprotein F;Heterogeneous nuclear ribonucleoprotein F, N-terminally processed	3	0	8702400	12036000	0	4330700	0	4.78869	0.230205
B5MCW2;G5E9G0;P39023;H7C422;F8WCR1;H7C3M2	RPL3	60S ribosomal protein L3	22	9517300	5493200	7803900	13725000	10589000	7494700	0.717238	0.234443
A0A087WYB4;Q9UJZ1;Q9UJZ1-2;F2Z2I8	STOML2	Stomatin-like protein 2, mitochondrial	17	8101700	12687000	9154700	0	10899000	4572400	1.9354	0.234661
C9J7K9;O15162-2;O15162;C9J0H3;H7C5I5;C9J9P4;C9JE06	PLSCR1	Phospholipid scramblase 1	17	0	2489200	0	0	19891000	7131100	0.0921172	0.236477
Q15366;Q15366-2;Q15366-6;Q15366-3;F8VXH9;H3BSS4;F8W1G6;H3BRU6;F8VZX2;J3QT27;F8W0G4;P57721-4;H3BND9;E9PFP8;Q15366-5;P57721-5;P57721-3;P57721-2;Q15366-4;Q15366-8;Q15366-7;P57721	PCBP2;PCBP3	Poly(rC)-binding protein 2;Poly(rC)-binding protein 3	26	1308700	0	5262000	0	11041000	15693000	0.245781	0.243285
Q5VTE0;P68104;A0A087WV01;A0A087WVQ9;A6PW80;Q5JR01	EEF1A1P5;EEF1A1	Putative elongation factor 1-alpha-like 3;Elongation factor 1-alpha 1;Elongation factor 1-alpha	10	225490000	75931000	68943000	300410000	137950000	215740000	0.566219	0.244264
P38606-2;P38606;C9JA17;C9JVW8	ATP6V1A	V-type proton ATPase catalytic subunit A	22	27549000	12778000	15779000	0	8158200	18986000	2.06696	0.246085
P24593;C9JXX4	IGFBP5	Insulin-like growth factor-binding protein 5	7	8280400	7040400	13982000	7798900	7659200	3337600	1.55902	0.247826
H0Y8L7;E9PFI5;D6RG13;P61247;D6RAS7;D6RB09;H0Y9Y4;D6RAT0;D6RED7;D6R9B6;D6RGE0;D6RI02	RPS3A	40S ribosomal protein S3a	34	21173000	3924500	1372400	0	0	1281900	20.649	0.249245
P42785;P42785-2;E9PIG4;E9PQB5;E9PL85;E9PQN3;E9PKN6;E9PNF7;E9PR42;E9PL49;E9PLY4;E9PNJ1	PRCP	Lysosomal Pro-X carboxypeptidase	40	9622600	28244000	27015000	0	13050000	18858000	2.0334	0.251203
M0R210;P62249;M0R3H0;M0QX76;M0R1M5;Q6IPX4	RPS16	40S ribosomal protein S16	16	0	8385600	1663700	0	0	0	#DIV/0!	0.261343
P17900;H0YBY3;E5RJD0	GM2A	Ganglioside GM2 activator;Ganglioside GM2 activator isoform short	7	72905000	95708000	71170000	293930000	71695000	133920000	0.480003	0.263793
A0A286YF22;A0A2C9F2M7;O43175;A0A286YFM8;A0A286YFL2;A0A286YFA2;A0A286YER3;A0A286YFC8;A0A286YFB2;A0A286YF34;A0A286YFF3;A0A286YFK5;A0A286YF78	PHGDH	D-3-phosphoglycerate dehydrogenase	44	12284000	20144000	16693000	0	9563700	17774000	1.79682	0.265731
C9JIZ6;P07602;P07602-2;P07602-3;Q5BJH1;A0A0J9YXB8	PSAP	Prosaposin;Saposin-A;Saposin-B-Val;Saposin-B;Saposin-C;Saposin-D	50	154250000	135720000	10509000	0	25334000	78649000	2.88969	0.266351
P09758	TACSTD2	Tumor-associated calcium signal transducer 2	3	9694600	3988100	6412100	0	4619300	5989400	1.89418	0.266863
P15531;P15531-2;E7ERL0;J3KPD9;C9K028;F6XY72;E5RHP0	NME1;NME2	Nucleoside diphosphate kinase A	2	0	1304000	7149300	0	0	0	#DIV/0!	0.269157
Q7Z7H5-3;Q7Z7H5-2;Q7Z7H5;F8W7F7	TMED4	Transmembrane emp24 domain-containing protein 4	10	8663500	8212600	3973200	0	8553300	0	2.43757	0.27186
Q01459	CTBS	Di-N-acetylchitobiase	6	20586000	21778000	21412000	0	19974000	18962000	1.63797	0.272044
Q02790;H0YFG2	FKBP4	Peptidyl-prolyl cis-trans isomerase FKBP4;Peptidyl-prolyl cis-trans isomerase FKBP4, N-terminally processed	3	1044500	0	0	0	1934900	6262100	0.127425	0.27431
O43760;O43760-2;K7ELD9;K7ENG9;K7ELS8;K7EJ35	SYNGR2	Synaptogyrin-2	20	116050000	75132000	62741000	81092000	133040000	126920000	0.744529	0.274934
Q13510-2;A0A1B0GTP7;Q13510;A0A1B0GTZ5;A0A1B0GTM3;A0A1B0GUA4;A0A1B0GW68;E7EMM4;A0A1B0GUH5;A0A1B0GUG1;A0A1B0GUW4;A0A1B0GVG2;A0A1B0GUE3;A0A1B0GUB3;A0A1B0GU06;A0A1B0GU62;A0A1B0GVJ1;A0A1B0GW48;A0A1B0GV06;A0A1B0GVC9;A0A1B0GV95;Q13510-3;A0A1B0GV88;A0A1B0GVA3;A0A1B0GVE7;A0A1B0GUJ3;A0A1B0GW66	ASAH1	Acid ceramidase;Acid ceramidase subunit alpha;Acid ceramidase subunit beta	86	31226000	66710000	38470000	0	36676000	37613000	1.83615	0.276549
P13073;Q86WV2;H3BPG0;H3BN72;H3BNV9	COX4I1	Cytochrome c oxidase subunit 4 isoform 1, mitochondrial	6	14386000	11061000	12653000	0	16769000	0	2.27205	0.278229
Q5T370;Q8N5I2;F2Z3I4;Q5T371	ARRDC1	Arrestin domain-containing protein 1	10	0	4455800	7057000	0	0	2978300	3.86556	0.281482
Q03252	LMNB2	Lamin-B2	7	0	4724000	5592500	0	2902700	0	3.5541	0.281892
P13639	EEF2	Elongation factor 2	4	15669000	8554300	14622000	0	4847400	15411000	1.91749	0.288083
Q08211	DHX9	ATP-dependent RNA helicase A	13	9991200	10590000	14255000	23623000	15737000	10397000	0.700127	0.288395
Q12791-2;S4R2X4;A0A1W2PPY5;Q5SVJ7;H0Y379;Q12791-5;D5MRH1;A0A1W2PQK5;A0A1W2PSD3;A0A1W2PRB0;H0Y382;A0A1W2PQ61;A0A1W2PNY8;B7ZMF5;A0A1W2PRN5;A0A1W2PRE5;Q5SVK0;A0A1W2PRX6;A0A1W2PQ93;A0A1W2PP26;A0A1W2PRG5;A0A0A0MRC3;A0A1W2PPS2;A0A1W2PR56;A0A1W2PPZ1;A0A1W2PNX9;A0A1W2PNW6;Q5SVK5;A0A1W2PR62;A0A0A0MRR0;A0A1W2PQA0;A0A1W2PNH9;A0A1W2PPH9;A0A1W2PQ53;A0A1W2PPX7;A0A1W2PQU4;A0A1W2PQJ9;Q5SVJ8;J3KQ16;A0A1W2PP94;A0A…	KCNMA1	Calcium-activated potassium channel subunit alpha-1	128	7669100	0	5857400	0	3977800	0	3.4005	0.298674
O75955;O75955-2;A0A140T9R1;A0A140T9W4;A2AB09;A0A140T9X0;A2AB10;A2AB12;A0A0G2JJQ6;A2AB13;A0A140T959;A2AB11;A0A140T9C3;A0A140T910;A0A140T957;A0A140T9B1;A0A140T974;A0A140T907;A0A140T905;A2ABJ5	FLOT1	Flotillin-1	122	251590000	198710000	209030000	286720000	219940000	243400000	0.879036	0.299389
P31949	S100A11	Protein S100-A11;Protein S100-A11, N-terminally processed	2	3625800	1957000	0	36683000	6159900	1984400	0.12454	0.299624
H0Y3H2;Q99758;Q99758-2	ABCA3	ATP-binding cassette sub-family A member 3	21	9122700	17902000	12843000	10578000	11100000	8767800	1.30946	0.300053
Q8NFW8-2;Q8NFW8;F5H296;F5GYM0	CMAS	N-acylneuraminate cytidylyltransferase	6	3256300	0	400330	0	0	0	#DIV/0!	0.300248
P61026;A0A087WWB9	RAB10	Ras-related protein Rab-10	4	20236000	34678000	34167000	23525000	29408000	0	1.6829	0.301014
P39019;A0A075B6E2;M0R2L9;M0QYF7;M0R140	RPS19	40S ribosomal protein S19	14	17154000	13760000	11747000	29853000	14519000	16252000	0.703698	0.305391
P38919;I3L3H2;C9JUF0;J3QQP0;E9PBH4;F8WE11	EIF4A3	Eukaryotic initiation factor 4A-III;Eukaryotic initiation factor 4A-III, N-terminally processed	7	6972600	5610400	6023300	0	7500000	3339200	1.71658	0.305759
A2A2D0;P16949;P16949-2;E5RGX5;Q93045;Q93045-2	STMN1;STMN2	Stathmin;Stathmin-2	9	0	2439000	1764600	0	1252800	0	3.35536	0.305878
P08559-3;P08559;P08559-2;P08559-4;Q5JPU3;P29803;Q5JPU2;Q5JPU0;Q5JPT9;Q5JPU1	PDHA1;PDHA2	Pyruvate dehydrogenase E1 component subunit alpha, somatic form, mitochondrial;Pyruvate dehydrogenase E1 component subunit alpha, testis-specific form, mitochondrial	25	543540	0	0	0	3232900	777830	0.135521	0.308285
Q14247-3;Q14247;Q14247-2;H0YEV2;H0YCD9	CTTN	Src substrate cortactin	14	18915000	8912200	8246500	0	7261100	11810000	1.89154	0.309355
P22087;M0R0P1;M0R299;M0QXL5;M0R2Q4;M0R2U2;M0R1H0;M0R2B0	FBL	rRNA 2-O-methyltransferase fibrillarin	25	0	10776000	1043900	0	0	0	#DIV/0!	0.314864
H0YA96;H0Y8G5;Q14103-4;Q14103-3;Q14103-2;Q14103;D6RF44;D6RAF8;D6RD83;D6RBQ9	HNRNPD	Heterogeneous nuclear ribonucleoprotein D0	24	8952300	18168000	5311200	9646100	30233000	16982000	0.570364	0.317514
P62258;B4DJF2;I3L3T1;P62258-2;I3L0W5;K7EIT4;K7EM20	YWHAE	14-3-3 protein epsilon	14	16038000	4970200	8190200	0	7257500	7792600	1.94008	0.317968
P48047;A0A494C0K9;H7C0C1;H7C086;H7C068	ATP5O	ATP synthase subunit O, mitochondrial	13	24059000	53202000	11567000	0	16150000	24052000	2.20954	0.318019
P56537;B7ZBH1;A0A0U1RQV5;P56537-2	EIF6	Eukaryotic translation initiation factor 6	5	0	7575500	6406900	0	0	4474300	3.12505	0.318999
P49916-4;P49916-3;P49916-2;P49916;K7ERZ5;K7EQB6;K7ENR9	LIG3	DNA ligase 3	16	0	1236800	2084000	0	997990	0	3.32749	0.324924
K7ELL7;P14314-2;P14314;K7EPW7;K7EKX1;K7EJ70	PRKCSH	Glucosidase 2 subunit beta	20	4756000	6074800	0	0	19262000	11206000	0.355481	0.328142
E7ER27;A0A2R8YD50;P51659;P51659-3;P51659-2;A0A2R8YDT8;A0A2R8YF45;A0A2R8Y7L2;E7ET17;E7EPL9;A0A2R8YEG2;A0A2R8Y7W2	HSD17B4	Peroxisomal multifunctional enzyme type 2;(3R)-hydroxyacyl-CoA dehydrogenase;Enoyl-CoA hydratase 2	72	23360000	12707000	19497000	9082400	11552000	19911000	1.37041	0.330162
Q5QNZ2;P24539	ATP5F1	ATP synthase F(0) complex subunit B1, mitochondrial	10	21320000	12463000	19084000	17675000	10918000	13355000	1.2603	0.333599
X6RJP6;P37802;P37802-2	TAGLN2	Transgelin-2	12	2177900	0	0	0	2546200	4691700	0.300902	0.334413
Q8WUY1	THEM6	Protein THEM6	1	3326900	650010	2439500	0	826860	2236600	2.0945	0.335895
P20933;H0Y9C7;H0Y8L9	AGA	N(4)-(beta-N-acetylglucosaminyl)-L-asparaginase;Glycosylasparaginase alpha chain;Glycosylasparaginase beta chain	13	77399000	44971000	49346000	57430000	32765000	40595000	1.31291	0.336315
Q8TC12;G3V2G6;G3V234;Q8TC12-3;Q8TC12-2;H0YIZ8;H0YJ46	RDH11	Retinol dehydrogenase 11	13	0	6828700	2845700	0	2633300	0	3.67387	0.339535
P51151;A0A1B0GUI0;Q9NP90	RAB9A	Ras-related protein Rab-9A	5	5863700	0	0	0	10028000	7497500	0.334581	0.339766
Q99538-3;Q99538-2;Q99538;G3V4P5;G3V3Z4;G3V2T4;G3V4E4	LGMN	Legumain	13	0	13332000	19286000	0	10824000	0	3.01349	0.342227
Q9Y446;Q9Y446-2;E9PQ15;E9PK71	PKP3	Plakophilin-3	19	7917200	9136400	8627500	18956000	7388400	10521000	0.696618	0.343424
Q9H0E2;F2Z2Y8;E7EN89;E9PNS3;E9PP67;E9PQ25;Q9H0E2-2	TOLLIP	Toll-interacting protein	11	17356000	0	1469500	0	1131000	0	16.645	0.3493
Q9H3Z4-2;Q9H3Z4	DNAJC5	DnaJ homolog subfamily C member 5	10	18125000	24029000	33179000	0	27115000	19208000	1.62625	0.350883
Q12907;D6RBV2;D6RIU4;D6RDX1;D6RBH1	LMAN2	Vesicular integral-membrane protein VIP36	19	20873000	34041000	11323000	146020000	21060000	28763000	0.338215	0.351077
Q9NUM4;F2Z3N7;C9JZ87	TMEM106B	Transmembrane protein 106B	5	19608000	26362000	26518000	0	35002000	0	2.07097	0.352509
Q02878;F8VZ45;U3KQR5;F8VR69;F8VZA3;F8VWR1;F8VU16	RPL6	60S ribosomal protein L6	18	19553000	7112200	25289000	80200000	19624000	18484000	0.439144	0.353254
P46977-2;P46977	STT3A	Dolichyl-diphosphooligosaccharide--protein glycosyltransferase subunit STT3A	4	3539500	3664800	5279600	0	5975100	0	2.08932	0.353533
P42167	TMPO	Lamina-associated polypeptide 2, isoforms beta/gamma;Thymopoietin;Thymopentin	1	7913400	7719700	9617900	0	8530800	7920400	1.5349	0.355924
Q9BU76;Q9BU76-4;Q9BU76-3;Q9BU76-2	MMTAG2	Multiple myeloma tumor-associated protein 2	25	6608300	45263000	25663000	3558300	18963000	17012000	1.96124	0.356529
P68363;F5H5D3;Q71U36-2;Q71U36;Q9BQE3;P68366-2;P68366;P68363-2;P0DPH7-2;P0DPH8;P0DPH7;F8VQQ4;A0A1W2PQM2;C9JJQ8;C9JEV8;F8VVB9;C9JQ00;Q6PEY2;Q9NY65;C9J2C0;Q9NY65-2;F8VX09;C9K0S6;F8VRZ4;C9JDS9;F8VWV9;F8VS66;C9JDL2;A6NHL2;A6NHL2-2	TUBA1B;TUBA1C;TUBA1A;TUBA4A	Tubulin alpha-1B chain;Tubulin alpha-1A chain;Tubulin alpha-1C chain;Tubulin alpha-4A chain	117	16513000	0	0	0	68422000	14213000	0.199831	0.36445
P51991;P51991-2;H7C1J8	HNRNPA3	Heterogeneous nuclear ribonucleoprotein A3	10	9830900	36933000	37264000	0	29418000	16427000	1.83287	0.364525
P49006	MARCKSL1	MARCKS-related protein	2	0	4583600	5616500	0	3712300	0	2.74765	0.366114
Q8N9U0;H0YJ73;Q8N9U0-2	TC2N	Tandem C2 domains nuclear protein	8	0	3843800	0	0	3743600	8402300	0.316469	0.37079
O00115;O00115-2;K7ENE5	DNASE2	Deoxyribonuclease-2-alpha	11	316350000	154110000	153270000	288070000	229400000	278140000	0.783965	0.372985
A0A0D9SEI3;A0A0D9SEN2;A0A0D9SER5;Q5QPR4;Q5QPR3;Q9UQ88-5;Q9UQ88;P21127-2;P21127-3;Q9UQ88-2;Q9UQ88-3;P21127-8;P21127-12;Q9UQ88-4;P21127-9;P21127-6;P21127-10;P21127-5;P21127-4;Q9UQ88-10;P21127;Q9UQ88-9	CDK11B;CDK11A	Cyclin-dependent kinase 11A;Cyclin-dependent kinase 11B	65	0	0	0	0	1390600	0	0	0.373901
Q13838-2;O00148-2;Q5STU3;F6WLT2;O00148;Q13838;A0A0G2JJZ9;A0A140T9X3;K7EQN7;A0A140TA18;F6UJC5;F6TRA5;A0A0A0MT12;F6S4E6;A0A140T996;A0A140T9X9;O00148-3;H0YCC6;K7EIL8;A0A140T9K1;F6SXL5;A0A140T973;F6S2B7;A0A140T9L4;H0Y400;A0A0G2JJL7;K7EN69;F6U6E2;K7EL56;F6R6M7;A0A0G2JHN7;K7EPJ3;F6QYI9;K7ENP6	DDX39B;DDX39A	Spliceosome RNA helicase DDX39B;ATP-dependent RNA helicase DDX39A	57	0	9757200	0	0	0	0	#DIV/0!	0.373901
C9IYP1;A0A590UJ81;H7C166;A0A590UJD9;A0A0C4DFT3;A0A590UKA8;A0A590UJC5;A0A590UJR5;A0A590UJ08;A0A590UJ18;A0A590UJ95;A0A590UJ68;A0A590UJS9;A0A590UJX2;A0A590UJ86;A0A590UJR4;A0A590UK48;A0A590UJZ4;A0A590UJ29;A0A590UJ64;E7EQD7;Q12959-5;A0A590UK02;C9JN61;A0A590UK70;A0A590UJL2;A0A590UJ25;B4E2H8;A0A590UK52;Q12959-7;A0A590UK81;Q12959;Q12959-4;Q12959-8;Q12959-6;Q12959-9;Q12959-3;Q12959-2	DLG1	Disks large homolog 1	38	0	0	0	0	0	128760	0	0.373901
P06744-2;P06744;A0A2U3TZU2;K7EQ48;A0A2R8Y6C7;A0A0J9YYH3;A0A0J9YX90;A0A0J9YXP8;K7ERC6;CON__Q3ZBD7;K7EIL4;A0A0J9YYI8;K7EPY4;A0A0J9YXM3;K7EP41;K7ELR7;A0A2R8YF08;K7ERK8;A0A0J9YXH9;K7ENA0	GPI	Glucose-6-phosphate isomerase	36	5776900	0	0	0	0	0	#DIV/0!	0.373901
E7ERY9;Q01814-3;P23634-7;Q01814-6;Q01814-2;P23634-6;Q16720-4;Q01814;P20020;Q16720-3;Q16720;P23634-8;Q01814-5;P23634;A0A2R8Y4R4;A0A2U3TZI3;P20020-4;Q01814-8;P20020-6;Q16720-8;P23634-5;Q16720-7;P23634-4;Q01814-4;Q16720-6;A0A2U3U055;P23634-3;Q16720-5;Q01814-7;P23634-2;P20020-5;Q16720-2;P20020-2;P20020-1	ATP2B1;ATP2B2;ATP2B4;ATP2B3	Calcium-transporting ATPase;Plasma membrane calcium-transporting ATPase 2;Plasma membrane calcium-transporting ATPase 4;Plasma membrane calcium-transporting ATPase 3;Plasma membrane calcium-transporting ATPase 1	34	0	0	0	0	0	3018500	0	0.373901
J3QRI7;J3QQQ9;J3QQV1;E5RIT6;J3QRC4;Q9UNX3;P61254;E5RHH1;J3KSS0;J3KS10	RPL26;RPL26L1	60S ribosomal protein L26-like 1;60S ribosomal protein L26	31	0	0	10454000	0	0	0	#DIV/0!	0.373901
A0A087X208;A0A494C0G5;A0A494C1I6;O00468-2;O00468-6;O00468-3;O00468-5;O00468-4;O00468-7;O00468	AGRN	Agrin;Agrin N-terminal 110 kDa subunit;Agrin C-terminal 110 kDa subunit;Agrin C-terminal 90 kDa fragment;Agrin C-terminal 22 kDa fragment	30	0	0	1862200	0	0	0	#DIV/0!	0.373901
E9PNW0;F8W118;H0YIV4;F5H4R6;F8W0J6;B7Z9C2;F8W543;F8VV59;C9JZI7;F8VY35;F8VRJ2;F8VXI6;F8VUX1;F8W020;H0YHC3;C9J6D1;H0YH88;E9PKT8;F8VVB5;A8MXH2;E9PNJ7;E9PS34;E9PJJ2;P55209-3;P55209-2;Q99733;Q99733-2;P55209	NAP1L4;NAP1L1	Nucleosome assembly protein 1-like 1;Nucleosome assembly protein 1-like 4	28	0	0	0	0	559520	0	0	0.373901
H7C0V9;A0A0A0MRG2;E9PG40;P05067-10;P05067-3;P05067-4;P05067-5;P05067-6;P05067-7;P05067-11;P05067-8;P05067-9;P05067;H7C2L2	APP	Amyloid beta A4 protein;N-APP;Soluble APP-alpha;Soluble APP-beta;C99;Beta-amyloid protein 42;Beta-amyloid protein 40;C83;P3(42);P3(40);C80;Gamma-secretase C-terminal fragment 59;Gamma-secretase C-terminal fragment 57;Gamma-secretase C-terminal fragment 50;C31	27	0	0	2835900	0	0	0	#DIV/0!	0.373901
O95793;Q5JW30;A0A087X1A5;O95793-2;O95793-3;Q9NUL3-8;E7EVJ4;Q5JW28;E7EVI1;E5RJN7;F6UDC6;E7EPX0;Q9NUL3-6;Q9NUL3-7;Q9NUL3-4;Q9NUL3-2;Q9NUL3;Q9NUL3-3	STAU1	Double-stranded RNA-binding protein Staufen homolog 1	27	0	2754800	0	0	0	0	#DIV/0!	0.373901
A0A1W2PQ78;A0A1W2PNM1;A0A0D9SFP2;E9PF18;Q16836;Q16836-3;Q16836-2;A0A0A0MSE2;A0A1W2PQV5	HADH	Hydroxyacyl-coenzyme A dehydrogenase, mitochondrial	24	0	2250500	0	0	0	0	#DIV/0!	0.373901
A0A669KB68;A0A669KB56;A0A669KBA4;A0A669KB53;P42224;J3KPM9;A0A669KBI6;P42224-2;A0A669KB52	STAT1	Signal transducer and activator of transcription 1-alpha/beta;Signal transducer and activator of transcription	22	0	0	0	0	6239700	0	0	0.373901
H0YNS9;H0YLB8;H0YMB3;H0YLV5;A0A087WWM4;F8WAN9;H0YNJ6;Q9P2T1-3;Q9P2T1;Q9P2T1-2;H0YKE1;H0YNH0	GMPR2	GMP reductase;GMP reductase 2	22	0	0	1932100	0	0	0	#DIV/0!	0.373901
A0A087WXM6;J3QQT2;J3QLC8;J3KRX5;A0A0A0MRF8;A0A0A6YYL6;P18621-2;P18621;P18621-3;J3KRB3;A0A087WWH0;J3QS96	RPL17;RPL17-C18orf32	60S ribosomal protein L17	21	0	0	0	0	13879000	0	0	0.373901
G3V599;A0A2R8YE69;A0A5F9ZHA4;Q8IX95;P0CG41;Q96PC5-12;Q96PC5-7;Q96PC5-14;A4D2H0;A4FU28;Q86UF2;Q96PC5-6;Q8IX94;Q96PC5-9;Q96PC5-10;Q96PC5-8;Q96RT6;Q96PC5-5;Q96PC5-13;Q96PC5-11;Q96PC5	CTAGE3P;CTAGE8;MIA2;CTAGE15;CTAGE9;CTAGE6;CTAGE4;CTAGE1	Putative cTAGE family member 3;cTAGE family member 8;Melanoma inhibitory activity protein 2;cTAGE family member 15;cTAGE family member 9;cTAGE family member 6;cTAGE family member 4;cTAGE family member 2	21	0	0	0	0	405070	0	0	0.373901
B5MCT4;P19224-2;P35503;P35504;P22309;P19224;O60656;Q9HAW8;Q9HAW9;Q9HAW7;P22310-2;P35503-3;P35504-2;P22309-2;P19224-3;Q9HAW8-2;Q9HAW9-2;O60656-2;Q9HAW7-2;P22310	UGT1A6;UGT1A3;UGT1A5;UGT1A1;UGT1A9;UGT1A10;UGT1A8;UGT1A7;UGT1A4	UDP-glucuronosyltransferase 1-6;UDP-glucuronosyltransferase 1-3;UDP-glucuronosyltransferase 1-5;UDP-glucuronosyltransferase 1-1;UDP-glucuronosyltransferase 1-9;UDP-glucuronosyltransferase 1-10;UDP-glucuronosyltransferase 1-8;UDP-glucuronosyltransferase 1-7;UDP-glucuronosyltransferase 1-4	20	0	0	0	0	0	825830	0	0.373901
P51790-4;P51790;P51790-2;E9PE15;A0A087WU31;A0A0A0MTB7;P51790-5;D6RIX3;D6RDZ6;H0Y8Z8	CLCN3	H(+)/Cl(-) exchange transporter 3;Chloride channel protein	20	0	1792900	0	0	0	0	#DIV/0!	0.373901
A0A1W2PQ43;E9PK09;E9PQN2;E9PKI6;E9PK91;Q9NYF8-4;Q9NYF8-3;Q9NYF8-2;Q9NYF8;E9PJA7	BCLAF1	Bcl-2-associated transcription factor 1	19	0	0	2115900	0	0	0	#DIV/0!	0.373901
A0A5H1ZRS9;A2NJV5;A0A0A0MRZ7;A0A075B6S2;A0A5H1ZRS2;A0A087X0Q4;A0A075B6S6;A0A075B6P5;A0A0C4DH68;A0A075B6R9;A0A087WW87;P06310;P01615;P01614	IGKV A18;IGKV2D-26;IGKV2D-29;IGKV2-40;IGKV2D-30;IGKV2D-28;IGKV2-24;IGKV2D-24	Ig kappa chain V-II region RPMI 6410;Ig kappa chain V-II region FR;Ig kappa chain V-II region Cum	18	0	0	0	59056000	0	0	0	0.373901
A0A3F2YNX0;A0A3F2YNZ0;F1T0I1;O15027-2;O15027-4;O15027-3;O15027;O15027-5;A0A0C4DH09;X6RGP5	SEC16A	Protein transport protein Sec16A	18	0	0	0	0	0	2302200	0	0.373901
A0A087X271;H3BVI6;B4DDF4;B4DUT8;Q99439-2;Q99439;U3KPS3;K7ES69;H3BQH0;A0A087X1X5;Q15417-3;Q15417	CNN2;CNN3	Calponin;Calponin-2;Calponin-3	18	0	0	920210	0	0	0	#DIV/0!	0.373901
B4DR61;P61619;H7C1Q9;C9JXC6;H7C069;A6NK38;F2Z2C7;A6NIF9;C9JJV4;F8W776;Q8TC24;P61619-3;Q9H9S3-2;Q9H9S3-3;Q9H9S3	SEC61A1;SEC61A2	Protein transport protein Sec61 subunit alpha isoform 1;Protein transport protein Sec61 subunit alpha isoform 2	17	0	0	0	0	8832500	0	0	0.373901
P31943;P55795;G8JLB6;E9PCY7;D6RJ04;H0YB39;D6RBM0;H0YBD7;H0YBG7;D6RIH9;E7EQJ0;E5RGH4;D6RDU3;D6RIT2;D6RFM3;D6R9T0;E5RGV0;H0YAQ2;D6RAM1;D6RIU0	HNRNPH1;HNRNPH2	Heterogeneous nuclear ribonucleoprotein H;Heterogeneous nuclear ribonucleoprotein H, N-terminally processed;Heterogeneous nuclear ribonucleoprotein H2	17	0	0	0	7065300	0	0	0	0.373901
J3KT04;J3QR64;E7EQG2;J3KT12;J3QS69;J3QL43;J3KS93;J3KTB5;J3KS25;J3QLN6;J3QKZ9;J3KSN7;E7EMV8;P60842-2;P60842;Q14240;Q14240-2	EIF4A1;EIF4A2	Eukaryotic initiation factor 4A-I;Eukaryotic initiation factor 4A-II;Eukaryotic initiation factor 4A-II, N-terminally processed	17	0	0	0	0	0	3019400	0	0.373901
H0YC42;P55327-2;P55327-4;P55327;P55327-7;P55327-5;P55327-6;P55327-3	TPD52	Tumor protein D52	16	0	0	0	0	0	4932500	0	0.373901
E9PLR0;E9PLE9;A0A2R8Y6G7;E9PKG6;Q2L696;P80303-2;P80303;E9PJP3;E9PM22	NUCB2;Nucb2	Nucleobindin-2;Nesfatin-1	16	0	0	0	0	0	321660	0	0.373901
A0A3B3IU78;A0A3B3ISK1;A0A3B3ITV3;A0A3B3ISC6;A0A3B3IT15;A0A3B3IS84;P53621;P53621-2	COPA	Coatomer subunit alpha;Xenin;Proxenin	16	0	1834100	0	0	0	0	#DIV/0!	0.373901
F5GZS6;J3KPF3;P08195-2;P08195-3;P08195;P08195-4;F5H867;F5H0E2;F5GZI0;H0YFS2	SLC3A2	4F2 cell-surface antigen heavy chain	16	0	1237600	0	0	0	0	#DIV/0!	0.373901
K7EKP9;K7EKU8;C9JYG3;C9JWP9;A0A3B3ITI9;O14909;A0A3B3IU19;A0A3B3ISR0;B7Z647;B7Z3U2;A0A3B3IS17;A0A3B3ISQ5;B9EGL1;P78352-3;P78352;P78352-2	DLG4	Disks large homolog 4	16	0	0	1106300	0	0	0	#DIV/0!	0.373901
C9J6B6;C9J2Z7;C9K073;C9JF13;E7EX73;E9PGM1;E7EUU4;Q04637-6;Q04637-7;Q04637-5;Q04637-4;Q04637-3;Q04637;Q04637-8;Q04637-9	EIF4G1	Eukaryotic translation initiation factor 4 gamma 1	15	0	0	0	0	0	29560	0	0.373901
Q6WKZ4-3;Q6WKZ4;E7EX40;Q6WKZ4-2;Q6WKZ4-5	RAB11FIP1	Rab11 family-interacting protein 1	15	0	3122600	0	0	0	0	#DIV/0!	0.373901
Q9NW68-9;Q9NW68-4;Q9NW68-8;Q9NW68-2;Q9NW68;Q9NW68-7;Q9NW68-3;E9PQA7	BSDC1	BSD domain-containing protein 1	15	0	0	624550	0	0	0	#DIV/0!	0.373901
O43852-12;O43852-13;O43852-14;O43852-9;O43852-7;O43852-11;O43852-8;O43852-10;O43852-5;O43852-6;O43852-2;O43852;O43852-4;O43852-3	CALU	Calumenin	14	0	0	0	0	1865200	0	0	0.373901
Q92769-3;Q92769;E5RFI6;E5RJ04;E5RGV4;E5RHE7;E5RH52;E5RG37;E5RFP9;H3BM24;Q5TEE2;Q13547	HDAC2;HDAC1	Histone deacetylase 2;Histone deacetylase 1	14	0	0	0	0	1072300	0	0	0.373901
A0A087WXI3;A8MQB8;G3V0J0;Q06787-11;Q06787-10;Q06787-8;Q06787-6;Q06787-2;Q06787-4;Q06787-5;Q06787-9;Q06787-7;Q06787-3;Q06787	FMR1	Fragile X mental retardation protein 1	14	0	0	0	0	388090	0	0	0.373901
H3BMF4;Q9H2V7-3;Q9H2V7-2;Q9H2V7;H3BT44;H3BPT8;H3BPQ9;H3BR82;Q9H2V7-5;Q9H2V7-4	SPNS1	Protein spinster homolog 1	14	0	5699500	0	0	0	0	#DIV/0!	0.373901
P61313;E7EX53;A0A2R8Y738;A0A2R8YEM3;E7EQV9;E7ERA2;E7ENU7;P61313-2	RPL15	60S ribosomal protein L15;Ribosomal protein L15	14	0	0	4871500	0	0	0	#DIV/0!	0.373901
K7EM56;A0A0B4J2B4;S4R417;K7EQJ5;K7ELC2;P62841;S4R456;K7EJ78	RPS15	40S ribosomal protein S15	14	2810700	0	0	0	0	0	#DIV/0!	0.373901
A0A499FIX8;H7BXI1;A0A087WXU3;A0FGR8-2;A0FGR8;A0FGR8-6;A0FGR8-5;A0FGR8-4	ESYT2	Extended synaptotagmin-2	14	0	1475100	0	0	0	0	#DIV/0!	0.373901
Q5SSJ5;B0QZK4;Q5SSJ5-3;Q5SSJ5-2;B0QZK9;B0QZK8;Q5SWC8;Q5SSJ5-5	HP1BP3	Heterochromatin protein 1-binding protein 3	13	0	0	0	0	6633700	0	0	0.373901
E2QRB9;E9PIR7;F8W809;A0A087WSW9;A0A182DWI3;A0A087WSY9;Q16881-7;Q16881-5;Q16881-2;Q16881-4;Q16881-3;Q16881-6;Q16881	TXNRD1	Thioredoxin reductase 1, cytoplasmic	13	0	0	0	0	2961400	0	0	0.373901
Q8TB61-3;Q8TB61-2;Q8TB61;Q8TB61-5;Q8TB61-4	SLC35B2	Adenosine 3-phospho 5-phosphosulfate transporter 1	13	0	0	0	0	0	1614500	0	0.373901
D6RGK8;D6R909;D6RAU2;E9PD14;D6RBD0;D6RFX4;D6RFZ9;D6RHH4;D6R9Z1;D6RAC2;D6R9L0;D6REE5;P63244	GNB2L1	Guanine nucleotide-binding protein subunit beta-2-like 1;Guanine nucleotide-binding protein subunit beta-2-like 1, N-terminally processed	13	0	0	2042100	0	0	0	#DIV/0!	0.373901
H0YNV4;J3KNR0;B4DIB3;A0A087X0I6;P27448-8;P27448-6;P27448-3;P27448-4;P27448-2;P27448;Q9P0L2-3;P27448-7;Q9P0L2	MARK3;MARK1	MAP/microtubule affinity-regulating kinase 3;Serine/threonine-protein kinase MARK1	13	0	0	775290	0	0	0	#DIV/0!	0.373901
A0A0S2Z4K7;A0A0A0MT83;P26440-2;P26440;H0YKV0;H0YN10;H0YLC3;H7C4G6	IVD	Isovaleryl-CoA dehydrogenase, mitochondrial	12	0	0	0	0	0	1785500	0	0.373901
H3BTT9;H3BUA5;H3BRP9;H3BV43;H3BML4;H9KV29;O00241-2;Q5TFQ8;O00241;P78324-4;P78324;P78324-2	SIRPB1;SIRPA	Signal-regulatory protein beta-1;Signal-regulatory protein beta-1 isoform 3;Tyrosine-protein phosphatase non-receptor type substrate 1	12	0	0	0	0	439880	0	0	0.373901
H0YC29;E5RJ97;E5RFF3;Q9UHF7;Q9UHF7-3;Q9UHF7-2	TRPS1	Zinc finger transcription factor Trps1	12	0	0	6354200	0	0	0	#DIV/0!	0.373901
P62888;E5RI99;A0A0B4J213;A0A0C4DH44;E5RJH3	RPL30	60S ribosomal protein L30	12	0	5036800	0	0	0	0	#DIV/0!	0.373901
P35606-2;P35606;D6R997;D6RBZ7;D6RCL6;D6RBG7;D6RBT6	COPB2	Coatomer subunit beta	12	0	2504100	0	0	0	0	#DIV/0!	0.373901
B4DJ81;P28331-3;P28331-4;P28331-5;P28331;P28331-2	NDUFS1	NADH-ubiquinone oxidoreductase 75 kDa subunit, mitochondrial	12	0	0	1411400	0	0	0	#DIV/0!	0.373901
B1AHF3;P00387-2;P00387;P00387-3	CYB5R3	NADH-cytochrome b5 reductase 3;NADH-cytochrome b5 reductase 3 membrane-bound form;NADH-cytochrome b5 reductase 3 soluble form	12	0	0	933620	0	0	0	#DIV/0!	0.373901
A0A6I8PRV6;B1AK87;B1AK85;B1AK88;P47756-2;P47756	CAPZB	F-actin-capping protein subunit beta	12	0	0	598620	0	0	0	#DIV/0!	0.373901
B1AKS5;E9PM17;B3KNX7;A0A087X294;Q13177;O75914-2;Q13153;Q13153-2;O75914;O75914-4;O75914-3	PAK3;PAK1;PAK2	Non-specific serine/threonine protein kinase;Serine/threonine-protein kinase PAK 2;PAK-2p27;PAK-2p34;Serine/threonine-protein kinase PAK 3;Serine/threonine-protein kinase PAK 1	11	0	0	0	3980800	0	0	0	0.373901
F5H6E2;O00159-2;O00159-3;O00159;I3L3F5;I3L501;I3L3Y6	MYO1C	Unconventional myosin-Ic	11	0	0	0	0	0	1681500	0	0.373901
K7EKG4;O96008-2;O96008;K7EJ57	TOMM40	Mitochondrial import receptor subunit TOM40 homolog	11	0	0	6698000	0	0	0	#DIV/0!	0.373901
O43291;K7EKQ0;K7EM91;O43291-2;K7ESI5;K7EQZ3	SPINT2	Kunitz-type protease inhibitor 2	11	0	0	3091000	0	0	0	#DIV/0!	0.373901
H3BV11;H3BRI8;H3BM93;H3BVG0;Q8N1F7;H3BNN5	NUP93	Nuclear pore complex protein Nup93	11	0	0	2112800	0	0	0	#DIV/0!	0.373901
E9PNW2;E9PJC4;E9PQY7;E9PS99;E9PL78;E9PJM1;G3V1B9;E9PMQ9;E9PSI1;O15321-2;O15321	TM9SF1	Transmembrane 9 superfamily member 1	11	0	0	523780	0	0	0	#DIV/0!	0.373901
H0YDL4;A0A087WYJ6;G3V164;P42261-3;P42261-4;P42262;P42263;P42262-3;P42261;P42261-5	GRIA4;GRIA3;GRIA1;GRIA2	Glutamate receptor 1;Glutamate receptor 2;Glutamate receptor 3	10	0	0	0	0	13184000	0	0	0.373901
F5H4Y2;F5GYI2;F5H7U2;Q6P2Q0;Q9NP78-3;Q9NP78-6;Q9NP78-5;Q9NP78-7;Q9NP78-2;Q9NP78	ABCB9	ATP-binding cassette sub-family B member 9	10	0	0	0	0	0	2419400	0	0.373901
H3BR38;H3BM50;H3BPU5;H3BR25;H3BPT1;H3BN58;H3BSZ4;A0A0A0MR05;Q9BVC4-4;Q9BVC4	MLST8	Target of rapamycin complex subunit LST8	10	0	0	0	0	0	1694000	0	0.373901
A0A5F9ZHQ0;I3L206;A0A5F9ZHH2;A0A5F9ZH49;A0A5F9ZH71;A0A5F9ZGT4;A0A5F9ZHQ8;Q8N2K0-3;Q8N2K0;Q8N2K0-2	ABHD12	Monoacylglycerol lipase ABHD12	10	0	0	0	0	0	1651600	0	0.373901
H3BND4;Q6P996-3;Q6P996-4;Q6P996-5;Q6P996	PDXDC1	Pyridoxal-dependent decarboxylase domain-containing protein 1	10	0	0	0	0	0	1294800	0	0.373901
E9PFG7;A0A0D9SFS3;E9PDF2;E9PCR7;Q02218-3;Q9ULD0-3;Q9ULD0-2;Q9ULD0;Q02218-2;Q02218	OGDH;OGDHL	2-oxoglutarate dehydrogenase, mitochondrial;2-oxoglutarate dehydrogenase-like, mitochondrial	10	0	0	0	0	527140	0	0	0.373901
M0QXG9;M0R3F4;M0R2A4;M0R2K3;M0R193;M0R0I0;M0R2I2;J3KQS6;Q9NWV8-3;Q9NWV8	BABAM1	BRISC and BRCA1-A complex member 1	10	0	0	0	0	0	505300	0	0.373901
Q13444-11;Q13444-8;Q13444-2;Q13444-7;Q13444-6;Q13444-12;Q13444-5;Q13444-4;Q13444-3;Q13444	ADAM15	Disintegrin and metalloproteinase domain-containing protein 15	10	0	0	0	0	411410	0	0	0.373901
P55072;C9JUP7;C9IZA5	VCP	Transitional endoplasmic reticulum ATPase	10	0	10573000	0	0	0	0	#DIV/0!	0.373901
P46783;Q9NQ39;A0A2R8Y6L3;F6U211;A0A2R8Y7H1;S4R435;A0A2R8YFH6;A0A1W2PQS6	RPS10;RPS10P5;RPS10-NUDT3	40S ribosomal protein S10;Putative 40S ribosomal protein S10-like	10	0	5501600	0	0	0	0	#DIV/0!	0.373901
Q9BRG2;Q9BRG2-2;M0QZQ6	SH2D3A	SH2 domain-containing protein 3A	10	0	4940500	0	0	0	0	#DIV/0!	0.373901
A0A1B0GTL5;Q9BXF6	RAB11FIP5	Rab11 family-interacting protein 5	10	0	4512800	0	0	0	0	#DIV/0!	0.373901
Q15084-3;Q15084;Q15084-4;Q15084-5;Q15084-2	PDIA6	Protein disulfide-isomerase A6	10	0	3543600	0	0	0	0	#DIV/0!	0.373901
P68032;P68133;A6NL76;P62736;P63267;K7EM38;J3KT65;A0A2R8YGF8;I3L3R2;F6QUT6;E7EVS6;C9JFL5;G5E9R0;F6UVQ4;C9JZR7;C9JUM1;P63267-2;B8ZZJ2;F8WB63;C9JTX5;Q562R1;F8WCH0	ACTC1;ACTA1;ACTA2;ACTG2;ACTG1;ACTB	Actin, alpha cardiac muscle 1;Actin, alpha skeletal muscle;Actin, aortic smooth muscle;Actin, gamma-enteric smooth muscle	9	0	0	0	0	0	57919000	0	0.373901
P01112-2;P01112;G3V4K2;G3V5T7;P01116-2;P01116;P01111	HRAS;KRAS;NRAS	GTPase HRas;GTPase HRas, N-terminally processed;GTPase KRas;GTPase KRas, N-terminally processed;GTPase NRas	9	0	0	0	0	0	8550000	0	0.373901
K7EK07;Q71DI3;Q16695;P84243;P68431;K7EMV3;A0A590UJJ6;B4DEB1;K7ES00;Q6NXT2;K7EP01	H3F3B;HIST2H3A;HIST3H3;H3F3A;HIST1H3A;H3F3C	Histone H3;Histone H3.2;Histone H3.1t;Histone H3.3;Histone H3.1;Histone H3.3C	9	0	0	0	0	0	3079300	0	0.373901
O43747;O43747-2;H3BN71;B4DGE1;H3BR36;H3BUN9;H3BNR4	AP1G1	AP-1 complex subunit gamma-1	9	0	0	0	0	1432300	0	0	0.373901
J3KTF9;F6WST4;A0A1B0GXE7;F8VXD5;J3QRM9;Q8N138-4;Q9P0S3;Q8N138;Q53FV1	ORMDL3;ORMDL1;ORMDL2	ORM1-like protein 3;ORM1-like protein 1;ORM1-like protein 2	9	0	0	0	0	0	913230	0	0.373901
Q9NVC3;H3BN87;H3BU46;H3BPV9;H3BP25;H3BMC5;H3BPK8;Q9NVC3-2	SLC38A7	Putative sodium-coupled neutral amino acid transporter 7	9	0	0	0	0	0	740720	0	0.373901
P15924-2;P15924-3;P15924	DSP	Desmoplakin	9	0	4788000	0	0	0	0	#DIV/0!	0.373901
B7ZC39;B7ZC38;Q9NR46;Q9NR46-2;F8WFB9	SH3GLB2	Endophilin-B2	9	0	0	3541800	0	0	0	#DIV/0!	0.373901
A0A0A6YYA0;Q86XR7-2;Q9Y3B3-2;Q9Y3B3;G3V2Y2	TMED7-TICAM2;TMED7	Transmembrane emp24 domain-containing protein 7	9	0	0	2968700	0	0	0	#DIV/0!	0.373901
B8ZZU8;I3L0M9;Q15370;Q15370-2;A0A0B4J296	TCEB2	Transcription elongation factor B polypeptide 2	9	0	0	2293500	0	0	0	#DIV/0!	0.373901
M0QYM5;M0QYI8;M0QYZ0;M0R3F1;A0A0A0MRA5;B7Z4B8;Q9BUJ2-4;Q9BUJ2-2;Q9BUJ2	HNRNPUL1	Heterogeneous nuclear ribonucleoprotein U-like protein 1	9	0	0	1766900	0	0	0	#DIV/0!	0.373901
A0A087X163;Q9NP72;Q9NP72-2;Q5W0J0;H0Y6T8;Q9NP72-3	RAB18	Ras-related protein Rab-18	9	0	0	505760	0	0	0	#DIV/0!	0.373901
H3BMM5;A0A2R8YF87;Q96AX1;F5H7N5;F5H6Y0;A0A2R8Y5U3	VPS33A	Vacuolar protein sorting-associated protein 33A	9	0	0	245280	0	0	0	#DIV/0!	0.373901
B8ZZK4;H7C2W9;C9JU56;B7Z4E3;B7Z4C8;P62899-3;P62899;P62899-2	RPL31	60S ribosomal protein L31	8	0	0	0	59234000	0	0	0	0.373901
H7C5U3;H7C593;A0A494C105;Q9H3U5-2;Q9H3U5-3;Q9H3U5;Q9H3U5-5;Q9H3U5-6	MFSD1	Major facilitator superfamily domain-containing protein 1	8	0	0	0	0	2783700	0	0	0.373901
H0YLW7;H0YMW8;H0YNF3;H0YMR6;H0YLE6;H0YL55;H7BXE3;Q9NWH9	SLTM	SAFB-like transcription modulator	8	0	0	0	0	0	963370	0	0.373901
H3BRM5;H3BV69;H3BNX8;P20674	COX5A	Cytochrome c oxidase subunit 5A, mitochondrial	8	0	0	0	0	0	446590	0	0.373901
K7ENJ0;K7ELW1;Q5W0S5;A0A494C0B4;P54725-2;P54725-3;P54725;P54727	RAD23A;RAD23B	UV excision repair protein RAD23 homolog A;UV excision repair protein RAD23 homolog B	8	0	0	0	0	194380	0	0	0.373901
Q15836;K7ENK9;K7EKX0;J3QRU4;F8WCA0;L7N2F9;P63027	VAMP3;VAMP2	Vesicle-associated membrane protein 3;Vesicle-associated membrane protein 2	8	0	7624100	0	0	0	0	#DIV/0!	0.373901
D6R9W4;Q16643;Q16643-3;D6RFI1;Q16643-2	DBN1	Drebrin	8	6400400	0	0	0	0	0	#DIV/0!	0.373901
Q5QPL9;Q9UKM9-2;Q9UKM9;Q5QPM0;Q5QPM1	RALY	RNA-binding protein Raly	8	0	5803500	0	0	0	0	#DIV/0!	0.373901
P63010-3;P63010;P63010-2;A0A087X253;C9J1E7;A0A087WU93;A0A087WZQ6;A0A087WYD1;K7EN71;K7ERB2	AP2B1;AP1B1	AP-2 complex subunit beta	8	0	4424700	0	0	0	0	#DIV/0!	0.373901
F5H7F6;F5H6X2;P10620-2;P10620	MGST1	Microsomal glutathione S-transferase 1	8	0	0	3302300	0	0	0	#DIV/0!	0.373901
Q5JRI1;O75494-5;O75494-4;O75494-6;O75494-3;Q8WXF0;O75494-2;O75494	SRSF10;SRSF12	Serine/arginine-rich splicing factor 10;Serine/arginine-rich splicing factor 12	8	0	945740	0	0	0	0	#DIV/0!	0.373901
F8VNT9;F8VV56;F8W022;F8VWK8;P08962-3;P08962-2;P08962	CD63	Tetraspanin;CD63 antigen	7	0	0	0	0	0	57650000	0	0.373901
Q9Y6Q5;Q9Y6Q5-2;K7EK69;K7ERH5;K7EL08	AP1M2	AP-1 complex subunit mu-2	7	0	0	0	0	0	3006500	0	0.373901
A0A1B0GUD9;A0A1B0GTM0;A0A1B0GV75;A0A1B0GTB8;A0A1B0GWC0;A0A1B0GVF3;P23786	CPT2	Carnitine O-palmitoyltransferase 2, mitochondrial	7	0	0	0	0	2773000	0	0	0.373901
E7EU85;E9PFF5;B4DXZ6;P51114-3;P51114-2;P51114;P51116	FXR1;FXR2	Fragile X mental retardation syndrome-related protein 1;Fragile X mental retardation syndrome-related protein 2	7	0	0	0	0	0	2679900	0	0.373901
H0Y802;H0Y6Z0;A0A1W2PPS8;H0Y621;H0Y5K5;Q9Y282;Q9Y282-3	ERGIC3	Endoplasmic reticulum-Golgi intermediate compartment protein 3	7	0	0	0	0	2171100	0	0	0.373901
H0Y8B3;O43865-2;Q96HN2-4;Q96HN2-3;O43865;Q96HN2-2;Q96HN2	AHCYL2;AHCYL1	Adenosylhomocysteinase;Putative adenosylhomocysteinase 2;Putative adenosylhomocysteinase 3	7	0	0	0	0	0	1953100	0	0.373901
Q13435;E9PJT3;H0YEX5;E9PJ04;H0YCG1;E9PPJ0	SF3B2	Splicing factor 3B subunit 2	7	0	0	0	0	1880900	0	0	0.373901
Q9C0E8-2;Q9C0E8;Q9C0E8-4;Q9C0E8-3	LNP	Protein lunapark	7	0	0	0	0	1801700	0	0	0.373901
Q9NZD8-2;Q9NZD8;H0YMB7;H0YKB0;H3BRR0	SPG21	Maspardin	7	0	0	0	748290	0	0	0	0.373901
K7EJV0;K7EPY1;K7ENL0;Q9UHD8-7;Q9UHD8-2;Q9UHD8-5;Q9UHD8	2021-09-09	Septin-9	7	0	0	0	0	0	348190	0	0.373901
C9JRH2;C9J3R0;C9JMJ4;C9JQZ4;C9JW69;P18754;P18754-2	RCC1	Regulator of chromosome condensation	7	0	0	0	0	196710	0	0	0.373901
C9J3L8;C9J5W0;A0A3B3IRT8;E9PAL7;C9IZQ1;P43307-2;P43307	SSR1	Translocon-associated protein subunit alpha	7	0	0	0	105770	0	0	0	0.373901
P61353;K7ELC7;K7EQQ9;K7ERY7	RPL27	60S ribosomal protein L27	7	0	7363500	0	0	0	0	#DIV/0!	0.373901
G3V150;O94766-2;O94766;E9PNA1	B3GAT3	Galactosylgalactosylxylosylprotein 3-beta-glucuronosyltransferase 3	7	0	0	3200400	0	0	0	#DIV/0!	0.373901
Q9NZ01;M0R2N5;M0R3C3	TECR	Very-long-chain enoyl-CoA reductase	7	0	1764800	0	0	0	0	#DIV/0!	0.373901
H0Y6J6;Q96I25;Q5W011;Q5W010;Q5W012	RBM17	Splicing factor 45	7	0	1422100	0	0	0	0	#DIV/0!	0.373901
F8WCI3;B1AMJ5;A0A0A0MRG9;Q96SN8-4;Q96SN8-3;Q96SN8-2;Q96SN8	CDK5RAP2	CDK5 regulatory subunit-associated protein 2	7	0	1395900	0	0	0	0	#DIV/0!	0.373901
C9JDJ7;C9J5L1;E7EW00;H0Y8D9;E7ET15;O15042-2;O15042	U2SURP	U2 snRNP-associated SURP motif-containing protein	7	0	0	1288000	0	0	0	#DIV/0!	0.373901
H0YJ55;G3V5S7;G3V3T8;H0YJS0;G3V559;G3V2S6;Q9Y5K8	ATP6V1D	V-type proton ATPase subunit D	7	0	0	818200	0	0	0	#DIV/0!	0.373901
A0A286YEX4;P08651-4;P08651-5;P08651-3;P08651-6;P08651-2;P08651	NFIC	Nuclear factor 1 C-type	7	0	0	814040	0	0	0	#DIV/0!	0.373901
A0A087WXU5;A0A087WYV3;A0A0D9SEW3;A0A087WXF8;Q9NP64-2;Q9NP64-3;Q9NP64	ZCCHC17	Nucleolar protein of 40 kDa	7	0	0	432230	0	0	0	#DIV/0!	0.373901
Q5VVC8;P62913-2;P62913	RPL11	60S ribosomal protein L11	6	0	0	0	0	0	21224000	0	0.373901
Q8MH48;Q5RJ85;A0A0G2JPQ3;P17693-5;P17693;P17693-4	HLA-G	HLA class I histocompatibility antigen, alpha chain G	6	0	0	0	0	0	7560400	0	0.373901
E9PGB2;J3QSS3;A0A087WXK5;Q9BZC7-2;Q9BZC7;Q9BZC7-3	ABCA2	ATP-binding cassette sub-family A member 2	6	0	0	0	6718000	0	0	0	0.373901
A0A0A0MTI1;Q15392-2;Q15392	DHCR24	Delta(24)-sterol reductase	6	0	0	0	0	0	4312400	0	0.373901
B8ZZ51;B9A041;A0A5K1VW95;P40925-2;P40925;P40925-3	MDH1	Malate dehydrogenase, cytoplasmic	6	0	0	0	0	0	2654100	0	0.373901
A0A087WYL5;Q6UXD5-6;Q6UXD5-2;Q6UXD5-3;Q6UXD5-5;Q6UXD5	SEZ6L2	Seizure 6-like protein 2	6	0	0	0	0	0	1779000	0	0.373901
H3BMZ1;H3BRL8;H3BPZ1;H3BS72;Q9P035-2;Q9P035	HACD3	Very-long-chain (3R)-3-hydroxyacyl-CoA dehydratase 3	6	0	0	0	0	0	1538800	0	0.373901
I3L3B4;F8W9H0;E9PLN8;Q9BQB6-3;Q9BQB6-2;Q9BQB6	VKORC1	Vitamin K epoxide reductase complex subunit 1	6	0	0	0	0	0	1412800	0	0.373901
A0A3B3IRQ9;P55265-5;P55265-3;P55265-2;P55265;P55265-4	ADAR	Double-stranded RNA-specific adenosine deaminase	6	0	0	0	0	1336400	0	0	0.373901
C9JYJ6;Q4L180-5;Q4L180-3;Q4L180-7;Q4L180-2;Q4L180	FILIP1L	Filamin A-interacting protein 1-like	6	0	0	0	0	1235700	0	0	0.373901
A0A5F9ZHD4;A0A5F9ZHJ7;A0A5F9ZI66;A0A5F9ZHJ0;A0A5F9ZHL1;P24752	ACAT1	Acetyl-CoA acetyltransferase, mitochondrial	6	0	0	0	0	811420	0	0	0.373901
H7C5F2;H7C5H3;G5E9W7;G5E9V5;P82650-2;P82650	MRPS22	28S ribosomal protein S22, mitochondrial	6	0	0	0	0	475240	0	0	0.373901
B8ZZ10;A8MYV2;Q9NQ29-2;Q9NQ29-3;Q9NQ29;B8ZZ09	LUC7L	Putative RNA-binding protein Luc7-like 1	6	0	0	0	0	0	189390	0	0.373901
M0R0G9;M0QXK2;M0R221;M0R2B8;M0QZG7;P09012	SNRPA	U1 small nuclear ribonucleoprotein A	6	0	0	0	0	0	149750	0	0.373901
C9JXB8;C9JNW5;P83731	RPL24	60S ribosomal protein L24	6	0	9426600	0	0	0	0	#DIV/0!	0.373901
D3YTB1;F8W727;P62910	RPL32	60S ribosomal protein L32	6	0	8726500	0	0	0	0	#DIV/0!	0.373901
B3KUB4;O43570-2;O43570	CA12	Carbonic anhydrase 12	6	0	7864400	0	0	0	0	#DIV/0!	0.373901
K7ENU8;A0A087WXM8;P50895	BCAM	Basal cell adhesion molecule	6	0	4687600	0	0	0	0	#DIV/0!	0.373901
Q9HB90;Q9NQL2;Q9NQL2-2	RRAGC;RRAGD	Ras-related GTP-binding protein C;Ras-related GTP-binding protein D	6	0	0	2733500	0	0	0	#DIV/0!	0.373901
F8VXU5;Q9UBQ0;Q9UBQ0-2	VPS29	Vacuolar protein sorting-associated protein 29	6	0	2510500	0	0	0	0	#DIV/0!	0.373901
F8VYE8;F8W0W8;P36873;P36873-2;A0A087WYY5;F8VR82	PPP1CC	Serine/threonine-protein phosphatase;Serine/threonine-protein phosphatase PP1-gamma catalytic subunit	6	0	2436700	0	0	0	0	#DIV/0!	0.373901
P04899-4;P04899;P04899-5;P63096;P04899-3;P04899-6;P04899-2;P63096-2;A0A3B3ITM0;P09471-2;P09471;P11488;A8MTJ3;P19087;H0Y7E8;Q5JWE9;A0A087WZE5;A0A1W2PRJ7;A0A1W2PRE1;Q5JWD1;A0A087WTB6;A2A2R6;Q5JWF2-2;A0A3B3IUA8;P63092-4;H3BTM2;A0A1W2PP38;H0Y7F4;A0A1W2PQK2;P38405-2;A0A1W2PS82;P63092;P38405;P38405-3;P63092-3;P63092-2;Q5JWF2	GNAI2;GNAI1;GNAO1	Guanine nucleotide-binding protein G(i) subunit alpha-2;Guanine nucleotide-binding protein G(i) subunit alpha-1;Guanine nucleotide-binding protein G(o) subunit alpha	6	0	0	2304700	0	0	0	#DIV/0!	0.373901
O15127;H3BV04;H3BN93;H3BUB6;H3BPL9	SCAMP2	Secretory carrier-associated membrane protein 2	6	0	0	2102900	0	0	0	#DIV/0!	0.373901
A0A0C4DGA6;Q14527-2;Q14527	HLTF	Helicase-like transcription factor	6	0	0	2013900	0	0	0	#DIV/0!	0.373901
A0A2R8YE05;K7ENT6;P67936;P67936-2;K7EPB9;A0A5F9UN72	TPM4	Tropomyosin alpha-4 chain	6	0	0	1871800	0	0	0	#DIV/0!	0.373901
P08493;P08493-2	MGP	Matrix Gla protein	6	0	1774100	0	0	0	0	#DIV/0!	0.373901
H0YM70;A0A087X1Z3;Q9UL46	PSME2	Proteasome activator complex subunit 2	6	0	1648700	0	0	0	0	#DIV/0!	0.373901
H0YJB9;G3V4C6;Q9Y224	C14orf166	UPF0568 protein C14orf166	6	0	1437000	0	0	0	0	#DIV/0!	0.373901
B5MCT8;C9JM19;P46781	RPS9	40S ribosomal protein S9	6	0	1419700	0	0	0	0	#DIV/0!	0.373901
Q9NRA2-2;Q9NRA2	SLC17A5	Sialin	6	0	0	1336300	0	0	0	#DIV/0!	0.373901
Q12986-3;Q12986-2;Q12986	NFX1	Transcriptional repressor NF-X1	6	0	1229500	0	0	0	0	#DIV/0!	0.373901
C9JJI3;F5GYQ6;Q96HL8-4;Q96HL8-3;Q96HL8-2;Q96HL8	SH3YL1	SH3 domain-containing YSC84-like protein 1	6	0	0	919050	0	0	0	#DIV/0!	0.373901
E5RHF1;E5RGS8;E5RGQ6;A0A0C4DGW2;P57768-2;P57768	SNX16	Sorting nexin-16	6	0	0	701130	0	0	0	#DIV/0!	0.373901
A0A2R8Y611;O14617-3;O14617-4;O14617-2;O14617;O14617-5	AP3D1	AP-3 complex subunit delta-1	6	0	0	550060	0	0	0	#DIV/0!	0.373901
Q06481-5;Q06481-4;Q06481-2;Q06481-3;Q06481-6;Q06481	APLP2	Amyloid-like protein 2	6	0	0	302850	0	0	0	#DIV/0!	0.373901
Q5SZE2;Q5SZE3;H0YKH6;Q5SZE4;Q5SZE1;Q96G23	CERS2	Ceramide synthase 2	6	0	0	242690	0	0	0	#DIV/0!	0.373901
D6RFH4;H3BUX2;O43169	CYB5B	Cytochrome b5 type B	6	0	0	238400	0	0	0	#DIV/0!	0.373901
P62277;J3KMX5;E9PS50	RPS13	40S ribosomal protein S13	5	0	0	0	0	0	9905100	0	0.373901
F8VZI0;A0A2R8Y891;P08237-2;P08237;P08237-3	PFKM	ATP-dependent 6-phosphofructokinase, muscle type	5	0	0	0	0	0	7902500	0	0.373901
A8MT72;Q2NKQ5;Q16799-3;Q16799-2;Q16799	RTN1	Reticulon;Reticulon-1	5	0	0	0	0	0	6428500	0	0.373901
P49756;E9PQU5;P49756-2;P49756-3	RBM25	RNA-binding protein 25	5	0	0	0	0	4171100	0	0	0.373901
P42677;C9J1C5;H0YMV8;Q71UM5	RPS27;RPS27L	40S ribosomal protein S27;40S ribosomal protein S27-like	5	0	0	0	0	0	3839200	0	0.373901
Q9HD20;Q9HD20-2;H7C3H2	ATP13A1	Manganese-transporting ATPase 13A1	5	0	0	0	0	2866000	0	0	0.373901
Q5T4K2;Q5T4K4;Q5T4K3;Q9NY26-2;Q9NY26	SLC39A1	Zinc transporter ZIP1	5	0	0	0	0	2243300	0	0	0.373901
B4DEH8;G3V4T2;Q92843-2;Q86U42-2;Q86U42	PABPN1	Polyadenylate-binding protein 2	5	0	0	0	0	1976600	0	0	0.373901
J3KSH8;J3KT51;Q9UK76-3;Q9UK76;Q9UK76-2	HN1	Hematological and neurological expressed 1 protein;Hematological and neurological expressed 1 protein, N-terminally processed	5	0	0	0	0	1565900	0	0	0.373901
F8WF69;P09496-2;P09496-4;P09496-3;P09496	CLTA	Clathrin light chain A	5	0	0	0	0	1330400	0	0	0.373901
Q1JUQ3;A0A087WTS4;A0A087WV48;A0A087WZM5;P62942	FKBP12-Exin;FKBP1A	Peptidyl-prolyl cis-trans isomerase;Peptidyl-prolyl cis-trans isomerase FKBP1A	5	0	0	0	0	0	1259900	0	0.373901
A6NF51;O95861-3;O95861-4;O95861;O95861-2	BPNT1	3(2),5-bisphosphate nucleotidase 1	5	0	0	0	0	0	1247200	0	0.373901
Q8TAV0-5;Q8TAV0-2;Q8TAV0;Q8TAV0-4;Q8TAV0-3	FAM76A	Protein FAM76A	5	0	0	0	0	1127400	0	0	0.373901
G5E9X5;F5GYT8;E9PG35;E9PHF7;Q96RQ3	MCCC1	Methylcrotonoyl-CoA carboxylase subunit alpha, mitochondrial	5	0	0	0	0	0	1117000	0	0.373901
E9PPY7;E9PRV8;A0A087X1E4;P53365-3;P53365	ARFIP2	Arfaptin-2	5	0	0	0	0	1027200	0	0	0.373901
J9JIE0;A8MXZ4;A0A0C4DFY5;Q9NQ84;Q9NQ84-2	GPRC5C	G-protein coupled receptor family C group 5 member C	5	0	0	0	0	1025100	0	0	0.373901
H0YG38;F5H578;O75400-2;O75400-3;O75400	PRPF40A	Pre-mRNA-processing factor 40 homolog A	5	0	0	0	0	602100	0	0	0.373901
Q13185;C9JMM0;B8ZZ43;S4R2Y4	CBX3	Chromobox protein homolog 3	5	0	0	0	0	0	567530	0	0.373901
I3L2Z5;A0A087WWR2;P56270-3;P56270;P56270-2	MAZ	Myc-associated zinc finger protein	5	0	0	0	0	0	545030	0	0.373901
H3BSV8;H3BR35;P15170;P15170-2;P15170-3	GSPT1	Eukaryotic peptide chain release factor GTP-binding subunit ERF3A	5	0	0	0	0	489700	0	0	0.373901
A0A087X0K9;G5E9E7;G3V1L9;Q07157-2;Q07157	TJP1	Tight junction protein ZO-1	5	0	0	0	0	433250	0	0	0.373901
A0A0C4DGV3;B7Z8V7;Q4G0N4-3;Q4G0N4-2;Q4G0N4	NADK2	NAD kinase 2, mitochondrial	5	0	0	0	0	0	231740	0	0.373901
F2Z2W6;F2Z2Y5;H7BXJ5;A0A494C035;P05114	HMGN1	Non-histone chromosomal protein HMG-14	5	0	0	0	0	0	166550	0	0.373901
A0A0G2JM88;D6R9R1;D6RDF7;Q9HCC0-2;Q9HCC0	MCCC2	Methylcrotonoyl-CoA carboxylase beta chain, mitochondrial	5	0	0	0	0	0	58689	0	0.373901
A0A0J9YVY2;A0A0J9YYF6;A0A0J9YW63;E9PDI4;O00515	LAD1	Ladinin-1	5	0	0	0	0	57347	0	0	0.373901
H7C1U2;F2Z2B4;Q1PSW9;H0YG23;P10070	GLI2	Zinc finger protein GLI2	5	0	0	162420000	0	0	0	#DIV/0!	0.373901
P62873-2;P62873;F6X3N5;F6UT28;B3KVK2	GNB1	Guanine nucleotide-binding protein G(I)/G(S)/G(T) subunit beta-1	5	0	0	5730700	0	0	0	#DIV/0!	0.373901
E7EQL6;A0A087WWM6;O43272-2;O43272-1;O43272	PRODH	Proline dehydrogenase 1, mitochondrial	5	0	0	4572000	0	0	0	#DIV/0!	0.373901
P22304;B3KWA1;P22304-3;P22304-2	IDS	Iduronate 2-sulfatase;Iduronate 2-sulfatase 42 kDa chain;Iduronate 2-sulfatase 14 kDa chain	5	0	0	3160800	0	0	0	#DIV/0!	0.373901
Q9UNQ2;A0A494C0G7;A0A0C4DGB1	DIMT1	Probable dimethyladenosine transferase	5	0	0	2047800	0	0	0	#DIV/0!	0.373901
F8W895;A0A0A0MRK1;E9PAV9;Q5T3I0;Q5T3I0-3	GPATCH4	G patch domain-containing protein 4	5	0	0	1939500	0	0	0	#DIV/0!	0.373901
H0Y9X3;A0A024QZ42;A0A087WZ38;O75340-2;O75340	PDCD6	Programmed cell death protein 6	5	0	1399400	0	0	0	0	#DIV/0!	0.373901
O75489;G3V194;E9PS48;O75489-2	NDUFS3	NADH dehydrogenase [ubiquinone] iron-sulfur protein 3, mitochondrial	5	0	1347900	0	0	0	0	#DIV/0!	0.373901
A0A669KBF5;A0A669KBE6;Q9NV96-3;Q9NV96-2;Q9NV96	TMEM30A	Cell cycle control protein 50A	5	0	927470	0	0	0	0	#DIV/0!	0.373901
A0A2U3TZH3;Q05639;A0A2R8Y488;A0A2R8Y660;A0A2R8YDN5	EEF1A2	Elongation factor 1-alpha 2	5	0	838720	0	0	0	0	#DIV/0!	0.373901
H3BTL2;H3BS02;O14874-2;O14874-3;O14874	BCKDK	[3-methyl-2-oxobutanoate dehydrogenase [lipoamide]] kinase, mitochondrial	5	0	0	591000	0	0	0	#DIV/0!	0.373901
H7C046;A0A0A0MTJ9;Q6PIU2-3;Q6PIU2;Q6PIU2-2	NCEH1	Neutral cholesterol ester hydrolase 1	5	0	527380	0	0	0	0	#DIV/0!	0.373901
A0A0A0MSM0;Q92598-2;Q92598-3;Q92598;Q92598-4	HSPH1	Heat shock protein 105 kDa	5	0	0	522200	0	0	0	#DIV/0!	0.373901
E9PKB0;E9PS32;E9PP43;E9PPB3;Q92673	SORL1	Sortilin-related receptor	5	0	0	480940	0	0	0	#DIV/0!	0.373901
E9PID8;E7EWR4;P33240-2;P33240;Q9H0L4	CSTF2;CSTF2T	Cleavage stimulation factor subunit 2;Cleavage stimulation factor subunit 2 tau variant	5	0	442420	0	0	0	0	#DIV/0!	0.373901
Q5W0U4;Q5W0U4-2	BSPRY	B box and SPRY domain-containing protein	5	0	0	219580	0	0	0	#DIV/0!	0.373901
P13798;C9JIF9;H7C393	APEH	Acylamino-acid-releasing enzyme	5	0	0	44519	0	0	0	#DIV/0!	0.373901
Q10589-2;Q10589	BST2	Bone marrow stromal antigen 2	4	0	0	0	0	35448000	0	0	0.373901
E7EPB3;P50914	RPL14	60S ribosomal protein L14	4	0	0	0	0	0	15953000	0	0.373901
Q7Z7N9;G3V185	TMEM179B	Transmembrane protein 179B	4	0	0	0	0	12615000	0	0	0.373901
Q9H029;Q9Y6B6;D6R9R5;D6RD69	DKFZp434B2017;SAR1B	GTP-binding protein SAR1b	4	0	0	0	0	0	6989400	0	0.373901
Q5T8U5;B7Z1G8;O15260-2;O15260	SURF4	Surfeit locus protein 4	4	0	0	0	0	0	6980100	0	0.373901
H0YJE4;H0YJ66;Q9Y394-2;Q9Y394	DHRS7	Dehydrogenase/reductase SDR family member 7	4	0	0	0	0	0	6063400	0	0.373901
P10599-2;P10599	TXN	Thioredoxin	4	0	0	0	0	5039700	0	0	0.373901
J3QLM1;Q14849-2;Q14849-3;Q14849	STARD3	StAR-related lipid transfer protein 3	4	0	0	0	0	0	3823200	0	0.373901
Q5JXX6;Q5JXX1;Q5JXX2;Q15014	MORF4L2	Mortality factor 4-like protein 2	4	0	0	0	0	3742800	0	0	0.373901
P50991-2;P50991	CCT4	T-complex protein 1 subunit delta	4	0	0	0	0	3398500	0	0	0.373901
Q5VWZ2-2;Q5VWZ2	LYPLAL1	Lysophospholipase-like protein 1	4	0	0	0	3354400	0	0	0	0.373901
M0R026;A1L0T0	ILVBL	Acetolactate synthase-like protein	4	0	0	0	0	3242200	0	0	0.373901
A0A3B3IRU2;B1AHD1;A0A3B3IUA2;P55769	NHP2L1	NHP2-like protein 1;NHP2-like protein 1, N-terminally processed	4	0	0	0	0	0	2797300	0	0.373901
J3QQY2;Q9UM00-1;Q9UM00-2;Q9UM00	TMCO1	Transmembrane and coiled-coil domain-containing protein 1	4	0	0	0	0	0	2745000	0	0.373901
H7C4J8;C9JYN0;Q16563-2;Q16563	SYPL1	Synaptophysin-like protein 1	4	0	0	0	0	2650200	0	0	0.373901
H7C4L9;C9JA36;P54709-2;P54709	ATP1B3	Sodium/potassium-transporting ATPase subunit beta-3	4	0	0	0	0	0	2412600	0	0.373901
Q6P1Q5;B0YIW6;P48444-2;P48444	ARCN1	Coatomer subunit delta	4	0	0	0	0	0	2298000	0	0.373901
F8W1K5;F8VXJ7;F8W031;Q9Y2B0	CNPY2	Protein canopy homolog 2	4	0	0	0	0	2068200	0	0	0.373901
A0A087X1N6;J3QRU7;Q6QNY1-2;Q6QNY1	BLOC1S2	Biogenesis of lysosome-related organelles complex 1 subunit 2	4	0	0	0	0	0	1899400	0	0.373901
Q5JWB9;A0A087WTT2;Q96A57;Q96A57-2	TMEM230	Transmembrane protein 230	4	0	0	0	0	0	1744600	0	0.373901
F8VNY5;Q9P031	CCDC59	Thyroid transcription factor 1-associated protein 26	4	0	0	0	0	1679600	0	0	0.373901
F8VQ14;F5GWF6;P78371-2;P78371	CCT2	T-complex protein 1 subunit beta	4	0	0	0	0	0	1561900	0	0.373901
K7EJM4;Q99536-2;Q99536-3;Q99536	VAT1	Synaptic vesicle membrane protein VAT-1 homolog	4	0	0	0	0	0	1403000	0	0.373901
Q9NXN4-2;Q9NXN4	GDAP2	Ganglioside-induced differentiation-associated protein 2	4	0	0	0	0	0	1396600	0	0.373901
V9GYG2;V9GYP9;Q5T621;P14550	AKR1A1	Alcohol dehydrogenase [NADP(+)]	4	0	0	0	1316500	0	0	0	0.373901
H7BZN7;H7C3E9;Q9NY93-2;Q9NY93	DDX56	Probable ATP-dependent RNA helicase DDX56	4	0	0	0	0	0	1282400	0	0.373901
O43663-3;O43663-2;O43663-4;O43663	PRC1	Protein regulator of cytokinesis 1	4	0	0	0	0	1253200	0	0	0.373901
J3KRM8;H7BYT1;P48730-2;P48730	CSNK1D	Casein kinase I isoform delta	4	0	0	0	0	0	1176000	0	0.373901
Q8NC51-4;Q8NC51-3;Q8NC51-2;Q8NC51	SERBP1	Plasminogen activator inhibitor 1 RNA-binding protein	4	0	0	0	0	0	1107200	0	0.373901
U3KQ84;A0A0C4DGS1;P39656-3;P39656	DDOST	Dolichyl-diphosphooligosaccharide--protein glycosyltransferase 48 kDa subunit	4	0	0	0	0	0	1075400	0	0.373901
H0YEN6;E9PS18;E9PLS9;O76062	TM7SF2	Delta(14)-sterol reductase	4	0	0	0	0	0	1067000	0	0.373901
F5H1S8;H0YG07;F5GX14;Q14165	MLEC	Malectin	4	0	0	0	0	1053400	0	0	0.373901
Q5VZM0;Q7L523;Q5VZM2-2;Q5VZM2	RRAGB;RRAGA	Ras-related GTP-binding protein A;Ras-related GTP-binding protein B	4	0	0	0	0	0	969270	0	0.373901
P62314;J3QLR7;J3QLI9	SNRPD1	Small nuclear ribonucleoprotein Sm D1	4	0	0	0	0	0	899480	0	0.373901
A0A3B3IRW2;A0A3B3IRK6;Q13724-2;Q13724	MOGS	Mannosyl-oligosaccharide glucosidase	4	0	0	0	0	0	824560	0	0.373901
G3V1B6;H7C1U8;Q9BUR5-2;Q9BUR5	APOO	Apolipoprotein O	4	0	0	0	0	0	809740	0	0.373901
A0A0A0MRH6;Q5JRA6-4;Q5JRA6-2;Q5JRA6	MIA3	Melanoma inhibitory activity protein 3	4	0	0	0	0	0	681410	0	0.373901
E7ETX0;A0A1B0GTM1;A0A1B0GUM5;Q8NHX9	TPCN2	Two pore calcium channel protein 2	4	0	0	0	0	670340	0	0	0.373901
C9J7P5;C9IZN7;Q969Z0-2;Q969Z0	TBRG4	Protein TBRG4	4	0	0	0	0	651130	0	0	0.373901
K7ENI5;K7ELV2;Q96EE3;Q96EE3-1	SEH1L	Nucleoporin SEH1	4	0	0	0	0	644520	0	0	0.373901
B5MCD7;O43759-2;O43759-3;O43759	SYNGR1	Synaptogyrin-1	4	0	0	0	0	0	633040	0	0.373901
R4GMU8;E9PLX3;A0A0C4DGV4;O43504	LAMTOR5	Ragulator complex protein LAMTOR5	4	0	0	0	0	0	592360	0	0.373901
A0A087X2E5;A0A087WZN1;O43837-2;O43837	IDH3B	Isocitrate dehydrogenase [NAD] subunit, mitochondrial;Isocitrate dehydrogenase [NAD] subunit beta, mitochondrial	4	0	0	0	0	570750	0	0	0.373901
E9PLU0;E9PRI6;O00330-3;O00330	PDHX	Pyruvate dehydrogenase protein X component, mitochondrial	4	0	0	0	0	433200	0	0	0.373901
D6R958;H7C2Z0;Q8NC56-2;Q8NC56	LEMD2	LEM domain-containing protein 2	4	0	0	0	0	0	386140	0	0.373901
F8WBS5;F8WB72;C9K025;P18077	RPL35A	60S ribosomal protein L35a	4	0	0	0	0	0	187890	0	0.373901
K7EM02;K7EIJ8;Q8IYT4-2;Q8IYT4	KATNAL2	Katanin p60 ATPase-containing subunit A-like 2	4	0	0	0	150030	0	0	0	0.373901
E9PRM7;A0A0J9YWM3;A0A024RCG2;Q96BI1	SLC22A18	Solute carrier family 22 member 18	4	0	0	0	0	0	59401	0	0.373901
F5H669;Q8N684-2;Q8N684;Q8N684-3	CPSF7	Cleavage and polyadenylation specificity factor subunit 7	4	0	0	0	0	0	56346	0	0.373901
F8WE65;C9J5S7;P62937-2;P62937	PPIA	Peptidyl-prolyl cis-trans isomerase;Peptidyl-prolyl cis-trans isomerase A;Peptidyl-prolyl cis-trans isomerase A, N-terminally processed	4	0	11737000	0	0	0	0	#DIV/0!	0.373901
Q15286;F5H157;Q15286-2	RAB35	Ras-related protein Rab-35	4	0	0	8968200	0	0	0	#DIV/0!	0.373901
A0A0B4J1R7;Q96B45	C10orf32-ASMT;C10orf32	UPF0693 protein C10orf32	4	0	0	6680300	0	0	0	#DIV/0!	0.373901
Q96FJ2;P63167	DYNLL2;DYNLL1	Dynein light chain 2, cytoplasmic;Dynein light chain 1, cytoplasmic	4	0	4546000	0	0	0	0	#DIV/0!	0.373901
B4DXW1;Q9P1U1-2;Q9P1U1;P61158	ACTR3;ACTR3B	Actin-related protein 3B;Actin-related protein 3	4	0	0	4011400	0	0	0	#DIV/0!	0.373901
R4GMY8;E5RHG8;Q15369-2;Q15369	TCEB1	Transcription elongation factor B polypeptide 1	4	0	0	3890100	0	0	0	#DIV/0!	0.373901
Q9UL26;J3QR51;Q13636	RAB22A;RAB31	Ras-related protein Rab-22A;Ras-related protein Rab-31	4	0	0	3002300	0	0	0	#DIV/0!	0.373901
E9PRJ3;K4DIA7;E9PMR4;P48509	CD151	Tetraspanin;CD151 antigen	4	0	0	2734800	0	0	0	#DIV/0!	0.373901
Q9BUB7-2;Q9BUB7	TMEM70	Transmembrane protein 70, mitochondrial	4	0	2167000	0	0	0	0	#DIV/0!	0.373901
Q96S52;K7EN97;Q96S52-2	PIGS	GPI transamidase component PIG-S	4	0	0	1542300	0	0	0	#DIV/0!	0.373901
Q6UN15-4;Q6UN15-3;Q6UN15-5;Q6UN15	FIP1L1	Pre-mRNA 3-end-processing factor FIP1	4	0	0	1153900	0	0	0	#DIV/0!	0.373901
Q9H307;G3V5F0;G3V579	PNN	Pinin	4	0	1006600	0	0	0	0	#DIV/0!	0.373901
B8ZZ99;F8WCZ3;Q96NT0;Q96NT0-2	CCDC115	Coiled-coil domain-containing protein 115	4	0	0	758070	0	0	0	#DIV/0!	0.373901
F5GYQ2;F5GX77;Q9UI30-2;Q9UI30	TRMT112	Multifunctional methyltransferase subunit TRM112-like protein	4	0	754160	0	0	0	0	#DIV/0!	0.373901
A8MXN1;Q96HR9-2;Q96HR9	REEP6	Receptor expression-enhancing protein;Receptor expression-enhancing protein 6	3	0	0	0	0	6309900	0	0	0.373901
Q9BWH2;H7C0K8	FUNDC2	FUN14 domain-containing protein 2	3	0	0	0	0	6037700	0	0	0.373901
P00558-2;P07205;P00558	PGK1;PGK2	Phosphoglycerate kinase 1;Phosphoglycerate kinase 2	3	0	0	0	0	2831100	0	0	0.373901
C9JP35;C9JMN4;Q92520	FAM3C	Protein FAM3C	3	0	0	0	0	0	2799800	0	0.373901
Q8WVM8-2;Q8WVM8-3;Q8WVM8	SCFD1	Sec1 family domain-containing protein 1	3	0	0	0	0	2709000	0	0	0.373901
A0A3B3IT67;A0A3B3IU67;Q6NT16	SLC18B1	MFS-type transporter SLC18B1	3	0	0	0	0	2457100	0	0	0.373901
B5MD17;J3KS05;P83916	CBX1	Chromobox protein homolog 1	3	0	0	0	0	2114100	0	0	0.373901
S4R3N9;A0A1P0AYU5;Q9BWM7	SFXN3	Sideroflexin-3	3	0	0	0	0	0	2048400	0	0.373901
E5RJ09;E5RHW4;O94905	ERLIN2	Erlin-2	3	0	0	0	0	0	1982100	0	0.373901
H0Y368;Q5QPK2;O60762	DPM1	Dolichol-phosphate mannosyltransferase subunit 1	3	0	0	0	0	0	1957300	0	0.373901
H0YLR3;H0YMA0;P09661	SNRPA1	U2 small nuclear ribonucleoprotein A	3	0	0	0	0	0	1896500	0	0.373901
Q9Y490	TLN1	Talin-1	3	0	0	0	0	1770100	0	0	0.373901
B8ZZQ6;P06454-2;P06454	PTMA	Prothymosin alpha;Prothymosin alpha, N-terminally processed;Thymosin alpha-1	3	0	0	0	0	1745100	0	0	0.373901
M0R0K9;Q13263-2;Q13263	TRIM28	Transcription intermediary factor 1-beta	3	0	0	0	0	0	1673100	0	0.373901
O43166-3;O43166-2;O43166	SIPA1L1	Signal-induced proliferation-associated 1-like protein 1	3	0	0	0	0	1666000	0	0	0.373901
Q9NVP1	DDX18	ATP-dependent RNA helicase DDX18	3	0	0	0	0	1632700	0	0	0.373901
Q9UMS4;H0YGZ5	PRPF19	Pre-mRNA-processing factor 19	3	0	0	0	0	0	1561300	0	0.373901
C9J830;P13861-2;P13861	PRKAR2A	cAMP-dependent protein kinase type II-alpha regulatory subunit	3	0	0	0	0	0	1465200	0	0.373901
A0A3B3ISU0;Q02487-2;Q02487	DSC2	Desmocollin-2	3	0	0	0	0	1458900	0	0	0.373901
H3BV41;H3BND3;O43809	NUDT21	Cleavage and polyadenylation specificity factor subunit 5	3	0	0	0	0	0	1328700	0	0.373901
F6RP06;A0A0J9YW18;Q12983	BNIP3	BCL2/adenovirus E1B 19 kDa protein-interacting protein 3	3	0	0	0	0	0	1319500	0	0.373901
K7ES57;O43934-2;O43934	MFSD11	UNC93-like protein MFSD11	3	0	0	0	0	0	1289700	0	0.373901
X6RDA4;Q8WXF1-2;Q8WXF1	PSPC1	Paraspeckle component 1	3	0	0	0	0	1270000	0	0	0.373901
Q9BU23-3;Q9BU23-2;Q9BU23	LMF2	Lipase maturation factor 2	3	0	0	0	0	0	1132500	0	0.373901
K7ENI6;K7ERE1;Q8N2U0	TMEM256	Transmembrane protein 256	3	0	0	0	0	0	1096400	0	0.373901
E7ESZ7;A0A087WXC5;O95299	NDUFA10	NADH dehydrogenase [ubiquinone] 1 alpha subcomplex subunit 10, mitochondrial	3	0	0	0	0	1076100	0	0	0.373901
C9JT21;P43897;P43897-2	TSFM	Elongation factor Ts;Elongation factor Ts, mitochondrial	3	0	0	0	0	0	1069300	0	0.373901
B3KY94;O14735-3;O14735	CDIPT	CDP-diacylglycerol--inositol 3-phosphatidyltransferase	3	0	0	0	0	992990	0	0	0.373901
P53367-3;P53367-2;P53367	ARFIP1	Arfaptin-1	3	0	0	0	0	832380	0	0	0.373901
A0A3B3IU96;Q6NUK1-2;Q6NUK1	SLC25A24	Calcium-binding mitochondrial carrier protein SCaMC-1	3	0	0	0	0	0	819530	0	0.373901
Q9H0V9-3;Q9H0V9;Q9H0V9-2	LMAN2L	VIP36-like protein	3	0	0	0	0	0	810090	0	0.373901
H0YBC7;O60238-2;O60238	BNIP3L	BCL2/adenovirus E1B 19 kDa protein-interacting protein 3-like	3	0	0	0	0	716300	0	0	0.373901
D6RBE9;D6RBL5;P08758	ANXA5	Annexin;Annexin A5	3	0	0	0	0	709370	0	0	0.373901
H7C152;Q7Z3C6-2;Q7Z3C6	ATG9A	Autophagy-related protein 9A	3	0	0	0	0	617610	0	0	0.373901
F8VQQ8;P61088;Q5JXB2	UBE2N;UBE2NL	Ubiquitin-conjugating enzyme E2 N;Putative ubiquitin-conjugating enzyme E2 N-like	3	0	0	0	0	0	553600	0	0.373901
H7BZW6;O00422;O00422-2	SAP18	Histone deacetylase complex subunit SAP18	3	0	0	0	0	552470	0	0	0.373901
Q5QPE1;A0A2R8YFH5;Q15437	SEC23B	Protein transport protein Sec23B	3	0	0	0	0	496550	0	0	0.373901
M0R1H9;M0R3D4;Q9UI14	RABAC1	Prenylated Rab acceptor protein 1	3	0	0	0	0	495310	0	0	0.373901
A0A1B0GUB2;A0A3B3IRP5;Q6P1J9	CDC73	Parafibromin	3	0	0	0	0	431920	0	0	0.373901
J3QSV6;O76021-2;O76021	RSL1D1	Ribosomal L1 domain-containing protein 1	3	0	0	0	0	0	332800	0	0.373901
M0QXB4;O14579-3;O14579	COPE	Coatomer subunit epsilon	3	0	0	0	0	0	328210	0	0.373901
A6NHH0;X6RJ95;Q9H7Z7	PTGES2	Prostaglandin E synthase 2;Prostaglandin E synthase 2 truncated form	3	0	0	0	0	0	270630	0	0.373901
F5GXG4;Q96HS1-2;Q96HS1	PGAM5	Serine/threonine-protein phosphatase PGAM5, mitochondrial	3	0	0	0	0	0	242810	0	0.373901
I3L1P8;Q02978-2;Q02978	SLC25A11	Mitochondrial 2-oxoglutarate/malate carrier protein	3	0	0	0	0	172540	0	0	0.373901
H0YEF4;Q9C0B5-2;Q9C0B5	ZDHHC5	Palmitoyltransferase;Palmitoyltransferase ZDHHC5	3	0	0	0	0	147640	0	0	0.373901
H0Y5S9;H0Y682;P49674	CSNK1E	Casein kinase I isoform epsilon	3	0	0	0	0	0	147010	0	0.373901
G3XAN4;Q15629-2;Q15629	TRAM1	Translocating chain-associated membrane protein 1	3	0	0	0	0	0	134250	0	0.373901
Q8WVC2;Q9BYK1;P63220	RPS21	40S ribosomal protein S21	3	0	0	0	0	0	111110	0	0.373901
H0YMU2;H0YKC7;Q8IYA7	MKX	Homeobox protein Mohawk	3	27610000	0	0	0	0	0	#DIV/0!	0.373901
Q04941;Q04941-2	PLP2	Proteolipid protein 2	3	0	18274000	0	0	0	0	#DIV/0!	0.373901
H0YLF3;F5H6I0;P61769	B2M	Beta-2-microglobulin;Beta-2-microglobulin form pI 5.3	3	0	0	15243000	0	0	0	#DIV/0!	0.373901
H0YGE0;Q96M98-2;Q96M98	PACRG	Parkin coregulated gene protein	3	0	0	8378800	0	0	0	#DIV/0!	0.373901
Q86SF2;E9PBY3	GALNT7	N-acetylgalactosaminyltransferase 7	3	0	0	5532800	0	0	0	#DIV/0!	0.373901
Q14331;E9PRR7	FRG1	Protein FRG1	3	0	4400500	0	0	0	0	#DIV/0!	0.373901
Q6PK04;I3L0U5	CCDC137	Coiled-coil domain-containing protein 137	3	0	0	2946900	0	0	0	#DIV/0!	0.373901
F5H442;Q99816-2;Q99816	TSG101	Tumor susceptibility gene 101 protein	3	0	0	2935300	0	0	0	#DIV/0!	0.373901
P00367-2;P00367-3;P00367	GLUD1	Glutamate dehydrogenase 1, mitochondrial	3	0	2755200	0	0	0	0	#DIV/0!	0.373901
O15144;H7C3F9	ARPC2	Actin-related protein 2/3 complex subunit 2	3	0	2745500	0	0	0	0	#DIV/0!	0.373901
Q15274	QPRT	Nicotinate-nucleotide pyrophosphorylase [carboxylating]	3	0	2648000	0	0	0	0	#DIV/0!	0.373901
P04040	CAT	Catalase	3	0	2433200	0	0	0	0	#DIV/0!	0.373901
F8WF27;F8WBG6;P30408	TM4SF1	Transmembrane 4 L6 family member 1	3	0	0	2427600	0	0	0	#DIV/0!	0.373901
F8VS12;F8VZQ9;P82979	SARNP	SAP domain-containing ribonucleoprotein	3	0	0	2017500	0	0	0	#DIV/0!	0.373901
D6RDK6;D6RBN5;Q9NX40	OCIAD1	OCIA domain-containing protein 1	3	0	0	1518300	0	0	0	#DIV/0!	0.373901
J3QRS3;P19105;O14950	MYL12A;MYL12B	Myosin regulatory light chain 12A;Myosin regulatory light chain 12B	3	0	1461800	0	0	0	0	#DIV/0!	0.373901
G3V5B3;G3V3E6;Q96HE7	ERO1L	ERO1-like protein alpha	3	0	0	1443300	0	0	0	#DIV/0!	0.373901
Q8IWA5-3;Q8IWA5;Q8IWA5-2	SLC44A2	Choline transporter-like protein 2	3	0	1299400	0	0	0	0	#DIV/0!	0.373901
P15259;Q8N0Y7;P18669	PGAM2;PGAM4;PGAM1	Phosphoglycerate mutase 2;Probable phosphoglycerate mutase 4;Phosphoglycerate mutase 1	3	0	0	1151600	0	0	0	#DIV/0!	0.373901
H3BPY0;H3BNT2;O75208	COQ9	Ubiquinone biosynthesis protein COQ9, mitochondrial	3	0	0	1077600	0	0	0	#DIV/0!	0.373901
Q5VVW5;A0A087WT42;Q9NY64	SLC2A8	Solute carrier family 2, facilitated glucose transporter member 8	3	0	1017100	0	0	0	0	#DIV/0!	0.373901
J3KR33;A0JLT2-2;A0JLT2	MED19	Mediator of RNA polymerase II transcription subunit 19	3	0	0	991150	0	0	0	#DIV/0!	0.373901
G3V3Z8;P49757-3;P49757	NUMB	Protein numb homolog	3	0	0	683440	0	0	0	#DIV/0!	0.373901
A0A2R8Y6B6;A0A087WUQ6;P07203	GPX1	Glutathione peroxidase;Glutathione peroxidase 1	3	0	574740	0	0	0	0	#DIV/0!	0.373901
K7EQG1;Q9NXS2-3;Q9NXS2	QPCTL	Glutaminyl-peptide cyclotransferase-like protein	3	0	0	501030	0	0	0	#DIV/0!	0.373901
H7BZ75;O75600;O75600-2	GCAT	2-amino-3-ketobutyrate coenzyme A ligase, mitochondrial	3	0	0	410070	0	0	0	#DIV/0!	0.373901
P49790-2;P49790;P49790-3	NUP153	Nuclear pore complex protein Nup153	3	0	0	378830	0	0	0	#DIV/0!	0.373901
Q5QPE4;Q5QPE5;Q9Y5X3	SNX5	Sorting nexin-5	3	0	0	367620	0	0	0	#DIV/0!	0.373901
G3V1B3;M0R181;P46778	RPL21	60S ribosomal protein L21	3	0	0	336110	0	0	0	#DIV/0!	0.373901
H7BXP3;Q8N393-2;Q8N393	ZNF786	Zinc finger protein 786	3	0	0	182890	0	0	0	#DIV/0!	0.373901
Q15750-2;Q15750	TAB1	TGF-beta-activated kinase 1 and MAP3K7-binding protein 1	2	0	0	0	0	0	61476000	0	0.373901
Q9H0U4;E9PLD0;A0A2R8YDI9;H0YLJ8;H0YL94;G3V196;A0A2R8YFB8;Q92928;P59190-2;P59190	RAB1B	Ras-related protein Rab-1B	2	0	0	0	0	0	45536000	0	0.373901
P17066;P48741	HSPA6;HSPA7	Heat shock 70 kDa protein 6;Putative heat shock 70 kDa protein 7	2	0	0	0	0	0	30648000	0	0.373901
H3BRV9;P61970	NUTF2	Nuclear transport factor 2	2	0	0	0	0	0	29178000	0	0.373901
J3KTJ3;P62829	RPL23	60S ribosomal protein L23	2	0	0	0	0	27253000	0	0	0.373901
F2Z388;P42766	RPL35	60S ribosomal protein L35	2	0	0	0	0	0	18879000	0	0.373901
H7BZK2;Q9Y5S1	TRPV2	Transient receptor potential cation channel subfamily V member 2	2	0	0	0	0	14141000	0	0	0.373901
A0A087WYN9;Q7Z478	DHX29	ATP-dependent RNA helicase DHX29	2	0	0	0	0	0	14010000	0	0.373901
H7BYH4;P00441	SOD1	Superoxide dismutase [Cu-Zn]	2	0	0	0	0	13840000	0	0	0.373901
K7ES41;O00194	RAB27B	Ras-related protein Rab-27B	2	0	0	0	0	0	12178000	0	0.373901
Q5JP53;P07437;Q5ST81;Q9BVA1;Q13885;A0A075B736;Q5SQY0;Q3ZCM7;A6NNZ2;CON__ENSEMBL:ENSBTAP00000025008;Q9H4B7;G3V2A3	TUBB;TUBB2B;TUBB2A;TUBB8	Tubulin beta chain;Tubulin beta-2B chain;Tubulin beta-2A chain;Tubulin beta-8 chain;Tubulin beta-8 chain-like protein LOC260334	2	0	0	0	0	0	12016000	0	0.373901
P30049	ATP5D	ATP synthase subunit delta, mitochondrial	2	0	0	0	0	0	11315000	0	0.373901
P31947-2;P31947	SFN	14-3-3 protein sigma	2	0	0	0	0	0	10918000	0	0.373901
H0YGT2;P20645	M6PR	Cation-dependent mannose-6-phosphate receptor	2	0	0	0	0	10683000	0	0	0.373901
A0A3B3IRL2;O75629	CREG1	Protein CREG1	2	0	0	0	0	0	9875300	0	0.373901
E9PPX6;Q5TC12-3	ATPAF1		2	0	0	0	0	9411900	0	0	0.373901
Q5MY95-2;Q5MY95	ENTPD8	Ectonucleoside triphosphate diphosphohydrolase 8	2	0	0	0	0	0	7029100	0	0.373901
H7C0R7;Q9UHQ9	CYB5R1	NADH-cytochrome b5 reductase 1	2	0	0	0	0	0	6402600	0	0.373901
O15540;O15540-2	FABP7	Fatty acid-binding protein, brain	2	0	0	0	0	6072100	0	0	0.373901
Q5VTU8;P56381	ATP5EP2;ATP5E	ATP synthase subunit epsilon-like protein, mitochondrial;ATP synthase subunit epsilon, mitochondrial	2	0	0	0	0	0	4782300	0	0.373901
G3V279;P84090	ERH	Enhancer of rudimentary homolog	2	0	0	0	0	0	4586700	0	0.373901
A0A1B0GWI2;O75503	CLN5	Ceroid-lipofuscinosis neuronal protein 5	2	0	0	0	0	0	4494700	0	0.373901
Q53TN4-3;Q53TN4	CYBRD1	Cytochrome b reductase 1	2	0	0	0	0	4190400	0	0	0.373901
K7EJ44;P07737	PFN1	Profilin-1	2	0	0	0	0	0	4016200	0	0.373901
P62318-2;P62318	SNRPD3	Small nuclear ribonucleoprotein Sm D3	2	0	0	0	0	0	3683600	0	0.373901
P17096;P17096-3	HMGA1	High mobility group protein HMG-I/HMG-Y	2	0	0	0	0	0	3677200	0	0.373901
Q9NX14;Q9NX14-2	NDUFB11	NADH dehydrogenase [ubiquinone] 1 beta subcomplex subunit 11, mitochondrial	2	0	0	0	0	0	3622700	0	0.373901
Q9BRR8	GPATCH1	G patch domain-containing protein 1	2	0	0	0	0	0	3579500	0	0.373901
F6RFD5;P60981	DSTN	Destrin	2	0	0	0	0	0	3507100	0	0.373901
E9PN39;Q6P444	MTFR2	Mitochondrial fission regulator 2	2	0	0	0	0	3472600	0	0	0.373901
A0A2R8YEP4;P30043	BLVRB	Flavin reductase (NADPH)	2	0	0	0	0	0	3453200	0	0.373901
A0A286YEY4;P01859	IGHG2	Ig gamma-2 chain C region	2	0	0	0	0	0	2811700	0	0.373901
O75306-2;O75306	NDUFS2	NADH dehydrogenase [ubiquinone] iron-sulfur protein 2, mitochondrial	2	0	0	0	0	0	2768800	0	0.373901
Q04917;A2IDB2	YWHAH	14-3-3 protein eta	2	0	0	0	0	0	2710600	0	0.373901
H7C0D5;Q9BSR8	YIPF4	Protein YIPF4	2	0	0	0	0	0	2705500	0	0.373901
Q9Y3L5;A0A087X2C3	RAP2C	Ras-related protein Rap-2c	2	0	0	0	0	2670800	0	0	0.373901
Q99735-2;Q99735	MGST2	Microsomal glutathione S-transferase 2	2	0	0	0	0	0	2617400	0	0.373901
P62191-2;P62191	PSMC1	26S protease regulatory subunit 4	2	0	0	0	2588700	0	0	0	0.373901
P23526-2;P23526	AHCY	Adenosylhomocysteinase	2	0	0	0	0	0	2539900	0	0.373901
Q9HAT2-2;Q9HAT2	SIAE	Sialate O-acetylesterase	2	0	0	0	0	2517100	0	0	0.373901
Q9UN86-2;Q9UN86	G3BP2	Ras GTPase-activating protein-binding protein 2	2	0	0	0	0	0	2241000	0	0.373901
O15173;O15173-2	PGRMC2	Membrane-associated progesterone receptor component 2	2	0	0	0	0	0	1977300	0	0.373901
Q9NPJ3-2;Q9NPJ3	ACOT13	Acyl-coenzyme A thioesterase 13;Acyl-coenzyme A thioesterase 13, N-terminally processed	2	0	0	0	0	0	1961300	0	0.373901
P17174-2;P17174	GOT1	Aspartate aminotransferase, cytoplasmic	2	0	0	0	0	0	1823700	0	0.373901
O43681	ASNA1	ATPase ASNA1	2	0	0	0	0	0	1700200	0	0.373901
P08579	SNRPB2	U2 small nuclear ribonucleoprotein B	2	0	0	0	0	0	1668800	0	0.373901
K7ELW0;Q99497	PARK7	Protein deglycase DJ-1	2	0	0	0	0	0	1584200	0	0.373901
Q9UQ35	SRRM2	Serine/arginine repetitive matrix protein 2	2	0	0	0	0	1540400	0	0	0.373901
H0YAS9;Q15006	EMC2	ER membrane protein complex subunit 2	2	0	0	0	0	1348900	0	0	0.373901
O75379-2;O75379	VAMP4	Vesicle-associated membrane protein 4	2	0	0	0	0	1313400	0	0	0.373901
P33897	ABCD1	ATP-binding cassette sub-family D member 1	2	0	0	0	0	1230300	0	0	0.373901
P45954-2;P45954	ACADSB	Short/branched chain specific acyl-CoA dehydrogenase, mitochondrial	2	0	0	0	0	1214500	0	0	0.373901
Q92616	GCN1L1	Translational activator GCN1	2	0	0	0	0	1192700	0	0	0.373901
Q9NY12-2;Q9NY12	GAR1	H/ACA ribonucleoprotein complex subunit 1	2	0	0	0	0	0	1138800	0	0.373901
D6RD66;O75083	WDR1	WD repeat-containing protein 1	2	0	0	0	0	1124400	0	0	0.373901
U3KQ56;Q9UBQ7	GRHPR	Glyoxylate reductase/hydroxypyruvate reductase	2	0	0	0	0	1051100	0	0	0.373901
P61020-2;P61020	RAB5B	Ras-related protein Rab-5B	2	0	0	0	0	0	1049300	0	0.373901
Q9Y2A7;Q9Y2A7-2	NCKAP1	Nck-associated protein 1	2	0	0	0	0	995040	0	0	0.373901
O14976-2;O14976	GAK	Cyclin-G-associated kinase	2	0	0	0	0	974300	0	0	0.373901
P49257	LMAN1	Protein ERGIC-53	2	0	0	0	0	0	973310	0	0.373901
P55317-2;P55317	FOXA1	Hepatocyte nuclear factor 3-alpha	2	0	0	0	0	938440	0	0	0.373901
Q5T6Z8;Q9BXS4	TMEM59	Transmembrane protein 59	2	0	0	0	0	910530	0	0	0.373901
Q8WUM4;Q8WUM4-2	PDCD6IP	Programmed cell death 6-interacting protein	2	0	0	0	0	894940	0	0	0.373901
Q9HB71-3;Q9HB71	CACYBP	Calcyclin-binding protein	2	0	0	0	0	844210	0	0	0.373901
B5MCA4;P16422	EPCAM	Epithelial cell adhesion molecule	2	0	0	0	0	840210	0	0	0.373901
P86791;P86790	CCZ1;CCZ1B	Vacuolar fusion protein CCZ1 homolog;Vacuolar fusion protein CCZ1 homolog B	2	0	0	0	0	767060	0	0	0.373901
P20339-2;P20339	RAB5A	Ras-related protein Rab-5A	2	0	0	0	0	0	723520	0	0.373901
C9JDR0;Q15738	NSDHL	Sterol-4-alpha-carboxylate 3-dehydrogenase, decarboxylating	2	0	0	0	0	709290	0	0	0.373901
P25788-2;P25788	PSMA3	Proteasome subunit alpha type-3	2	0	0	0	0	691370	0	0	0.373901
P30740-2;P30740	SERPINB1	Leukocyte elastase inhibitor	2	0	0	0	0	0	659950	0	0.373901
C9JM46;Q8N335	GPD1L	Glycerol-3-phosphate dehydrogenase [NAD(+)];Glycerol-3-phosphate dehydrogenase 1-like protein	2	0	0	0	0	0	641690	0	0.373901
Q9BRX8-2;Q9BRX8	FAM213A	Redox-regulatory protein FAM213A	2	0	0	0	0	0	633460	0	0.373901
A0A0G2JMS6;Q6IE36	OVOS2	Ovostatin homolog 2	2	0	0	0	0	0	566580	0	0.373901
Q9NR30-2;Q9NR30	DDX21	Nucleolar RNA helicase 2	2	0	0	0	0	481110	0	0	0.373901
Q9UHJ9-5;A8MYS5	PGAP2		2	0	0	0	0	393400	0	0	0.373901
Q9H0D6-2;Q9H0D6	XRN2	5-3 exoribonuclease 2	2	0	0	0	0	0	340490	0	0.373901
Q9P2X0;Q9P2X0-2	DPM3	Dolichol-phosphate mannosyltransferase subunit 3	2	0	0	0	0	0	286810	0	0.373901
V9GYB6;O94761	RECQL4	ATP-dependent DNA helicase Q4	2	0	0	0	0	188000	0	0	0.373901
O14672-2;O14672	ADAM10	Disintegrin and metalloproteinase domain-containing protein 10	2	0	0	0	0	0	160590	0	0.373901
Q9H269-2;Q9H269	VPS16	Vacuolar protein sorting-associated protein 16 homolog	2	0	0	0	0	0	118320	0	0.373901
B1ALM5;Q9P0T7	TMEM9	Transmembrane protein 9	2	0	0	0	0	0	113820	0	0.373901
A0A087WYT5;P20338	RAB4A	Ras-related protein Rab-4A	2	0	0	19024000	0	0	0	#DIV/0!	0.373901
P27144	AK4	Adenylate kinase 4, mitochondrial	2	0	0	12706000	0	0	0	#DIV/0!	0.373901
Q9UHA4-2;Q9UHA4	LAMTOR3	Ragulator complex protein LAMTOR3	2	0	6260000	0	0	0	0	#DIV/0!	0.373901
A9J4F5;O00488	ZNF593	Zinc finger protein 593	2	0	4133500	0	0	0	0	#DIV/0!	0.373901
O14949	UQCRQ	Cytochrome b-c1 complex subunit 8	2	0	3864200	0	0	0	0	#DIV/0!	0.373901
P52907	CAPZA1	F-actin-capping protein subunit alpha-1	2	0	3647800	0	0	0	0	#DIV/0!	0.373901
F8VWW8;Q92485	SMPDL3B	Acid sphingomyelinase-like phosphodiesterase 3b	2	0	0	3389800	0	0	0	#DIV/0!	0.373901
O75533	SF3B1	Splicing factor 3B subunit 1	2	0	0	3052500	0	0	0	#DIV/0!	0.373901
O95168-2;O95168	NDUFB4	NADH dehydrogenase [ubiquinone] 1 beta subcomplex subunit 4	2	0	2759100	0	0	0	0	#DIV/0!	0.373901
O95295	SNAPIN	SNARE-associated protein Snapin	2	0	0	2525000	0	0	0	#DIV/0!	0.373901
C9JPE8;P11233	RALA	Ras-related protein Ral-A	2	0	0	2488900	0	0	0	#DIV/0!	0.373901
Q8NBS9-2;Q8NBS9	TXNDC5	Thioredoxin domain-containing protein 5	2	0	0	2420600	0	0	0	#DIV/0!	0.373901
P46013-2;P46013	MKI67	Antigen KI-67	2	0	0	2191700	0	0	0	#DIV/0!	0.373901
Q6P2Q9	PRPF8	Pre-mRNA-processing-splicing factor 8	2	0	0	2089100	0	0	0	#DIV/0!	0.373901
Q9BX68	HINT2	Histidine triad nucleotide-binding protein 2, mitochondrial	2	0	2088300	0	0	0	0	#DIV/0!	0.373901
H3BVC8;Q16651	PRSS8	Prostasin;Prostasin light chain;Prostasin heavy chain	2	0	0	2032600	0	0	0	#DIV/0!	0.373901
Q7Z434-4;Q7Z434	MAVS	Mitochondrial antiviral-signaling protein	2	0	0	1890100	0	0	0	#DIV/0!	0.373901
O96019-2;O96019	ACTL6A	Actin-like protein 6A	2	0	0	1719100	0	0	0	#DIV/0!	0.373901
P0DN76;Q01081	U2AF1	Splicing factor U2AF 35 kDa subunit	2	0	0	1438100	0	0	0	#DIV/0!	0.373901
H7C3T4;Q13162	PRDX4	Peroxiredoxin-4	2	0	1428900	0	0	0	0	#DIV/0!	0.373901
Q99523-2;Q99523	SORT1	Sortilin	2	0	0	1271800	0	0	0	#DIV/0!	0.373901
Q9UGP8	SEC63	Translocation protein SEC63 homolog	2	0	0	1215300	0	0	0	#DIV/0!	0.373901
Q5VV89;O14880	MGST3	Microsomal glutathione S-transferase 3	2	0	1143200	0	0	0	0	#DIV/0!	0.373901
E5RJR5;P63208	SKP1	S-phase kinase-associated protein 1	2	0	0	1079100	0	0	0	#DIV/0!	0.373901
M0R208;Q16740	CLPP	ATP-dependent Clp protease proteolytic subunit;ATP-dependent Clp protease proteolytic subunit, mitochondrial	2	0	1044400	0	0	0	0	#DIV/0!	0.373901
C9J8T6;Q14061	COX17	Cytochrome c oxidase copper chaperone	2	0	0	1042300	0	0	0	#DIV/0!	0.373901
Q5TIH2;O95562	SFT2D2	Vesicle transport protein SFT2B	2	0	0	1035700	0	0	0	#DIV/0!	0.373901
Q9HCN8	SDF2L1	Stromal cell-derived factor 2-like protein 1	2	0	0	1034400	0	0	0	#DIV/0!	0.373901
H0YJ47;O75843	AP1G2	AP-1 complex subunit gamma-like 2	2	0	979630	0	0	0	0	#DIV/0!	0.373901
Q8IXB1-2;Q8IXB1	DNAJC10	DnaJ homolog subfamily C member 10	2	0	0	896640	0	0	0	#DIV/0!	0.373901
O43752-2;O43752	STX6	Syntaxin-6	2	0	0	808360	0	0	0	#DIV/0!	0.373901
A0A0A0MR36;Q9ULV0-2;Q9ULV0-3;K7EPI3;Q9UES5;O95317	MYO5B	Unconventional myosin-Vb	2	0	0	698350	0	0	0	#DIV/0!	0.373901
Q59GN2;P62891	RPL39P5;RPL39	Putative 60S ribosomal protein L39-like 5;60S ribosomal protein L39	2	0	0	543820	0	0	0	#DIV/0!	0.373901
Q8TDY2-2;Q8TDY2	RB1CC1	RB1-inducible coiled-coil protein 1	2	0	511390	0	0	0	0	#DIV/0!	0.373901
H3BPR2;Q13232	NME3	Nucleoside diphosphate kinase;Nucleoside diphosphate kinase 3	2	0	0	498250	0	0	0	#DIV/0!	0.373901
H0YDP7;Q13405	MRPL49	39S ribosomal protein L49, mitochondrial	2	0	0	490550	0	0	0	#DIV/0!	0.373901
A0A3B3IUD7;Q14690	PDCD11	Protein RRP5 homolog	2	0	407300	0	0	0	0	#DIV/0!	0.373901
Q9Y2Z0-2;Q9Y2Z0	SUGT1	Suppressor of G2 allele of SKP1 homolog	2	0	0	166270	0	0	0	#DIV/0!	0.373901
Q9NVJ2	ARL8B	ADP-ribosylation factor-like protein 8B	1	0	0	0	0	0	38949000	0	0.373901
Q7RTS1	BHLHA15	Class A basic helix-loop-helix protein 15	1	0	0	0	38234000	0	0	0	0.373901
Q8NC74	RBBP8NL	RBBP8 N-terminal-like protein	1	0	0	0	19802000	0	0	0	0.373901
H0YLW0	SRP14		1	0	0	0	0	17531000	0	0	0.373901
Q8N357	SLC35F6	Solute carrier family 35 member F6	1	0	0	0	0	17336000	0	0	0.373901
C9JV47	GCA		1	0	0	0	0	0	16414000	0	0.373901
P16403	HIST1H1C	Histone H1.2	1	0	0	0	0	0	8786300	0	0.373901
Q9UNZ5	C19orf53	Leydig cell tumor 10 kDa protein homolog	1	0	0	0	0	0	8028200	0	0.373901
P00451	F8	Coagulation factor VIII;Factor VIIIa heavy chain, 200 kDa isoform;Factor VIIIa heavy chain, 92 kDa isoform;Factor VIII B chain;Factor VIIIa light chain	1	0	0	0	0	0	6303200	0	0.373901
Q9NS69	TOMM22	Mitochondrial import receptor subunit TOM22 homolog	1	0	0	0	0	4044600	0	0	0.373901
P51153	RAB13	Ras-related protein Rab-13	1	0	0	0	0	0	3869700	0	0.373901
A0A0A0MS14	IGHV1-45		1	0	0	0	0	0	3670400	0	0.373901
P14174	MIF	Macrophage migration inhibitory factor	1	0	0	0	0	0	3541900	0	0.373901
Q9HD45	TM9SF3	Transmembrane 9 superfamily member 3	1	0	0	0	0	0	3412600	0	0.373901
P84095	RHOG	Rho-related GTP-binding protein RhoG	1	0	0	0	0	0	3224400	0	0.373901
O15551	CLDN3	Claudin-3	1	0	0	0	0	2909900	0	0	0.373901
P05204	HMGN2	Non-histone chromosomal protein HMG-17	1	0	0	0	0	2842400	0	0	0.373901
O95182	NDUFA7	NADH dehydrogenase [ubiquinone] 1 alpha subcomplex subunit 7	1	0	0	0	0	2443100	0	0	0.373901
P30041	PRDX6	Peroxiredoxin-6	1	0	0	0	0	0	2431600	0	0.373901
Q6Y1H2	HACD2	Very-long-chain (3R)-3-hydroxyacyl-CoA dehydratase 2	1	0	0	0	0	0	2396700	0	0.373901
P12236	SLC25A6	ADP/ATP translocase 3;ADP/ATP translocase 3, N-terminally processed	1	0	0	0	0	2344000	0	0	0.373901
Q8IY21	DDX60	Probable ATP-dependent RNA helicase DDX60	1	0	0	0	0	0	2146500	0	0.373901
Q9C005	DPY30	Protein dpy-30 homolog	1	0	0	0	0	0	1997000	0	0.373901
P29966	MARCKS	Myristoylated alanine-rich C-kinase substrate	1	0	0	0	0	1770800	0	0	0.373901
Q96EC8	YIPF6	Protein YIPF6	1	0	0	0	0	1697600	0	0	0.373901
P51970	NDUFA8	NADH dehydrogenase [ubiquinone] 1 alpha subcomplex subunit 8	1	0	0	0	0	0	1657900	0	0.373901
Q0VAA2	LRRC74A	Leucine-rich repeat-containing protein 74A	1	0	0	0	0	0	1571500	0	0.373901
Q9Y6K5	OAS3	2-5-oligoadenylate synthase 3	1	0	0	0	0	0	1548800	0	0.373901
P22059	OSBP	Oxysterol-binding protein 1	1	0	0	0	0	0	1499200	0	0.373901
Q9NP61	ARFGAP3	ADP-ribosylation factor GTPase-activating protein 3	1	0	0	0	0	0	1304400	0	0.373901
O75439	PMPCB	Mitochondrial-processing peptidase subunit beta	1	0	0	0	0	0	1222800	0	0.373901
O95202	LETM1	LETM1 and EF-hand domain-containing protein 1, mitochondrial	1	0	0	0	0	0	1182700	0	0.373901
P10301	RRAS	Ras-related protein R-Ras	1	0	0	0	0	1066200	0	0	0.373901
Q96I24	FUBP3	Far upstream element-binding protein 3	1	0	0	0	0	0	1057900	0	0.373901
Q9BVC6	TMEM109	Transmembrane protein 109	1	0	0	0	0	1026500	0	0	0.373901
Q8TA86	RP9	Retinitis pigmentosa 9 protein	1	0	0	0	0	999580	0	0	0.373901
Q99570	PIK3R4	Phosphoinositide 3-kinase regulatory subunit 4	1	0	0	0	0	0	969780	0	0.373901
Q8IYL3	C1orf174	UPF0688 protein C1orf174	1	0	0	0	0	924950	0	0	0.373901
P28072	PSMB6	Proteasome subunit beta type-6	1	0	0	0	0	0	908110	0	0.373901
Q4KMP7	TBC1D10B	TBC1 domain family member 10B	1	0	0	0	0	0	832970	0	0.373901
O95274	LYPD3	Ly6/PLAUR domain-containing protein 3	1	0	0	0	0	813800	0	0	0.373901
P55081	MFAP1	Microfibrillar-associated protein 1	1	0	0	0	0	0	780120	0	0.373901
Q9NVA4	TMEM184C	Transmembrane protein 184C	1	0	0	0	0	777570	0	0	0.373901
Q96HY7	DHTKD1	Probable 2-oxoglutarate dehydrogenase E1 component DHKTD1, mitochondrial	1	0	0	0	0	0	757600	0	0.373901
O15145	ARPC3	Actin-related protein 2/3 complex subunit 3	1	0	0	0	0	728360	0	0	0.373901
Q9Y3I0	RTCB	tRNA-splicing ligase RtcB homolog	1	0	0	0	0	0	715000	0	0.373901
Q9BUF7	CRB3	Protein crumbs homolog 3	1	0	0	0	0	602680	0	0	0.373901
A4D1U4	LCHN	Protein LCHN	1	0	0	0	0	597290	0	0	0.373901
O75348	ATP6V1G1	V-type proton ATPase subunit G 1	1	0	0	0	0	0	576840	0	0.373901
P42166;G5E972;P42167-3;P42167-2;H0YJH7	TMPO	Lamina-associated polypeptide 2, isoform alpha;Thymopoietin;Thymopentin;Lamina-associated polypeptide 2, isoforms beta/gamma;Thymopoietin;Thymopentin	1	0	0	0	0	0	526460	0	0.373901
P36021	SLC16A2	Monocarboxylate transporter 8	1	0	0	0	0	0	494220	0	0.373901
P29373	CRABP2	Cellular retinoic acid-binding protein 2	1	0	0	0	0	0	413870	0	0.373901
P61160	ACTR2	Actin-related protein 2	1	0	0	0	0	0	349670	0	0.373901
Q01650	SLC7A5	Large neutral amino acids transporter small subunit 1	1	0	0	0	0	0	347530	0	0.373901
H0YAZ4	CNGB3		1	0	0	0	0	0	213230	0	0.373901
Q92572	AP3S1	AP-3 complex subunit sigma-1	1	0	0	0	0	0	40426	0	0.373901
Q96P70	IPO9	Importin-9	1	0	0	0	0	35266	0	0	0.373901
O95857	TSPAN13	Tetraspanin-13	1	0	0	11765000	0	0	0	#DIV/0!	0.373901
P04114	APOB	Apolipoprotein B-100;Apolipoprotein B-48	1	0	0	11196000	0	0	0	#DIV/0!	0.373901
Q9NX58	LYAR	Cell growth-regulating nucleolar protein	1	0	5089000	0	0	0	0	#DIV/0!	0.373901
Q7L0X0	TRIL	TLR4 interactor with leucine rich repeats	1	0	4444300	0	0	0	0	#DIV/0!	0.373901
Q9Y6I8	PXMP4	Peroxisomal membrane protein 4	1	0	0	3315600	0	0	0	#DIV/0!	0.373901
P56385	ATP5I	ATP synthase subunit e, mitochondrial	1	0	0	3303600	0	0	0	#DIV/0!	0.373901
Q9UII2	ATPIF1	ATPase inhibitor, mitochondrial	1	0	3192600	0	0	0	0	#DIV/0!	0.373901
Q9NRX5	SERINC1	Serine incorporator 1	1	0	0	2458100	0	0	0	#DIV/0!	0.373901
P12273	PIP	Prolactin-inducible protein	1	0	0	2307900	0	0	0	#DIV/0!	0.373901
Q10471	GALNT2	Polypeptide N-acetylgalactosaminyltransferase 2;Polypeptide N-acetylgalactosaminyltransferase 2 soluble form	1	0	0	2257200	0	0	0	#DIV/0!	0.373901
Q13015	MLLT11	Protein AF1q	1	0	0	2047200	0	0	0	#DIV/0!	0.373901
O95721	SNAP29	Synaptosomal-associated protein 29	1	0	0	1887500	0	0	0	#DIV/0!	0.373901
Q86WX3	RPS19BP1	Active regulator of SIRT1	1	0	0	1374900	0	0	0	#DIV/0!	0.373901
Q15125	EBP	3-beta-hydroxysteroid-Delta(8),Delta(7)-isomerase	1	0	0	1348300	0	0	0	#DIV/0!	0.373901
O43143	DHX15	Pre-mRNA-splicing factor ATP-dependent RNA helicase DHX15	1	0	0	1233300	0	0	0	#DIV/0!	0.373901
Q00403	GTF2B	Transcription initiation factor IIB	1	0	0	967370	0	0	0	#DIV/0!	0.373901
Q3B820-2			1	0	0	844360	0	0	0	#DIV/0!	0.373901
Q14126	DSG2	Desmoglein-2	1	0	0	831870	0	0	0	#DIV/0!	0.373901
O15270	SPTLC2	Serine palmitoyltransferase 2	1	0	0	789110	0	0	0	#DIV/0!	0.373901
Q92747	ARPC1A	Actin-related protein 2/3 complex subunit 1A	1	0	0	742450	0	0	0	#DIV/0!	0.373901
O00479	HMGN4	High mobility group nucleosome-binding domain-containing protein 4	1	0	0	676590	0	0	0	#DIV/0!	0.373901
Q13347	EIF3I	Eukaryotic translation initiation factor 3 subunit I	1	0	0	662350	0	0	0	#DIV/0!	0.373901
P17931	LGALS3	Galectin-3	1	0	0	116050	0	0	0	#DIV/0!	0.373901
O60783	MRPS14	28S ribosomal protein S14, mitochondrial	1	0	0	107510	0	0	0	#DIV/0!	0.373901
A0A140T962;A0A1W2PRZ0;A0A140T937;A0A140T9J9;A0A1W2PR11;A0A140T912;O78179;Q5QT33;A0A140T9B3;A0A140T930;Q53YP1;A0A140T9M0;Q5SS57;A0A140T9W2;A0A140T9U0;P01889;A0A1W2PPR8;A0A1W2PSE7;P04439;Q5SUL5;S6AU73;D9J307;P01893;Q5SRN7;P04439-2;Q5SRN5;A0A1W2PS24;A0A0G2JI36;A0A0G2JL56;A0A1W2PQD0;A0A1W2PNZ7;A0A140T951;A0A0G2JIF2;A0A0G2JH66;A0A140T9B7;A0A140T9X6;Q2L6G2;D5H3J5;A0A140T9S9;A0A140T9W7;A0A140T9A9;Q31611…	HLA-C;HLA-B;HLA-A;HLA-H	HLA class I histocompatibility antigen, B-7 alpha chain;HLA class I histocompatibility antigen, A-3 alpha chain;Putative HLA class I histocompatibility antigen, alpha chain H	0	0	0	0	0	951330	0	0	0.373901
S4R3H4;E7EQT4;Q9UKV3-5;Q9UKV3;G3V3B0;Q9UKV3-3;Q9UKV3-2;G3V3T3	ACIN1	Apoptotic chromatin condensation inducer in the nucleus	19	856500	0	2351400	0	949300	0	3.37923	0.375936
Q9C0C2;Q9C0C2-2;A0A2R8Y5C4	TNKS1BP1	182 kDa tankyrase-1-binding protein	6	0	1944700	3583600	0	1903800	0	2.90382	0.376216
Q12931;Q12931-2;I3L0K7;I3L239;I3L3L4	TRAP1	Heat shock protein 75 kDa, mitochondrial	29	21445000	11768000	12083000	0	15480000	12742000	1.60499	0.376766
O75367-2;O75367-3;O75367;D6RCF2;B4DJC3;Q5SQT3;Q9P0M6	H2AFY	Core histone macro-H2A.1;Histone H2A	23	12240000	21158000	27436000	0	19933000	17947000	1.60597	0.377828
E7EMC7;Q13501-2;Q13501;C9JRJ8;E9PFW8;E3W990	SQSTM1	Sequestosome-1	9	0	4065000	4537400	0	3253700	0	2.64388	0.378692
J3KPS2;A0A494C1T9;Q6ZRV2	FAM83H	Protein FAM83H	12	2509800	0	0	0	2348400	5383400	0.324607	0.380744
Q15717;Q15717-2	ELAVL1	ELAV-like protein 1	6	11626000	2515700	10793000	0	7614700	6300500	1.7919	0.381501
P36957;Q86SW4;P36957-2;H0YJF9;G3V5M3;G3V3F0	DLST	Dihydrolipoyllysine-residue succinyltransferase component of 2-oxoglutarate dehydrogenase complex, mitochondrial	10	0	11472000	9482000	0	7939500	0	2.63921	0.381857
O75396;A0A087X1A9	SEC22B	Vesicle-trafficking protein SEC22b	5	17107000	5583100	7463500	0	7982300	8901800	1.78592	0.38632
P10809;E7EXB4;E7ESH4;P10809-2;C9JL25;C9JL19;C9JCQ4	HSPD1	60 kDa heat shock protein, mitochondrial	28	301320000	239910000	232030000	374700000	234930000	297190000	0.852716	0.387746
D6RCD9;D6RHV8;D6RAU7;D6RIZ2;D6RDY8;Q9BSA9	TMEM175	Transmembrane protein 175	18	0	5712900	5900800	0	4511000	0	2.57453	0.388878
Q99832-4;Q99832-3;Q99832;F8WAM2;Q99832-2	CCT7	T-complex protein 1 subunit eta	8	6663900	0	1143900	0	1645700	0	4.74436	0.389327
O60716;O60716-5;O60716-7;A0A669KB62;A0A669KB05;O60716-6;O60716-3;O60716-4;O60716-11;C9JZR2;O60716-9;O60716-8;O60716-10;O60716-12;O60716-2;O60716-14;O60716-13;O60716-17;O60716-15;O60716-20;O60716-22;O60716-19;O60716-21;O60716-23;O60716-18;O60716-24;O60716-16;O60716-27;O60716-25;O60716-31;O60716-29;O60716-32;O60716-30;O60716-28;O60716-26;E9PKY0	CTNND1	Catenin delta-1	90	1564600	2229800	1109900	0	2412600	0	2.03279	0.39255
X6R5C5;X6R8A1;P10619-2;P10619;Q5JZH0	CTSA	Carboxypeptidase;Lysosomal protective protein;Lysosomal protective protein 32 kDa chain;Lysosomal protective protein 20 kDa chain	22	57447000	58092000	67915000	68277000	41534000	48787000	1.15672	0.393548
Q9NR28-2;Q9NR28-3;Q9NR28	DIABLO	Diablo homolog, mitochondrial	6	1361600	0	0	0	4081600	1020600	0.266865	0.394321
P61978-3;P61978;P61978-2;Q5T6W2;S4R457;S4R359	HNRNPK	Heterogeneous nuclear ribonucleoprotein K	43	29151000	22519000	31222000	0	38828000	9977900	1.6984	0.394969
P56182;D6RE82	RRP1	Ribosomal RNA processing protein 1 homolog A	3	0	1305500	1721400	0	1180300	0	2.56452	0.397885
U3KQE2;K7EM73;K7EIV0;A0A075B7C0;A0A0C4DGQ5;P04632;U3KPR7;K7EKD8;K7ELJ7	CAPNS1	Calpain small subunit 1	24	6230000	4097600	7042100	0	8744200	0	1.98643	0.398393
P04844-2;P04844;Q5JYR3;Q5JYR4;Q5JYR7	RPN2	Dolichyl-diphosphooligosaccharide--protein glycosyltransferase subunit 2	13	9400900	1523500	0	0	36827000	7090700	0.248747	0.398658
Q92609-2;Q92609;C9J3F6	TBC1D5	TBC1 domain family member 5	10	5636900	5624800	5898800	0	4731300	6756800	1.49376	0.398835
A0A087WVQ6;Q00610-2;Q00610;J3KS13;A0A087WX41;P53675-2;P53675;K7EJJ5;J3KRF5;J3QL20;J3KSQ2	CLTC	Clathrin heavy chain;Clathrin heavy chain 1	105	24533000	130600000	22000000	5089300	35978000	31270000	2.44871	0.399183
P10606	COX5B	Cytochrome c oxidase subunit 5B, mitochondrial	2	0	16627000	11236000	0	10733000	0	2.59601	0.399786
O15126;A0A087WXB0;O15126-2;A0A087WU14;A0A087WTX8;A0A087WZA6	SCAMP1	Secretory carrier-associated membrane protein 1	18	0	0	6332100	0	5598500	12393000	0.35195	0.402918
Q96SB3	PPP1R9B	Neurabin-2	4	0	1729200	2644100	0	1702600	0	2.5686	0.406597
Q00325;Q00325-2;F8VVM2	SLC25A3	Phosphate carrier protein, mitochondrial	7	49234000	0	0	7982800	48094000	53238000	0.450387	0.40968
O60832	DKC1	H/ACA ribonucleoprotein complex subunit 4	2	0	2696800	4651400	0	2849200	0	2.57904	0.414643
P61586;Q5JR08;P08134;E9PLA2;C9JRM1;Q5JR06;Q5JR07;E9PN11;C9JNR4;E9PQH6;C9JX21;Q5JR05;U3KQA9;U3KQV3	RHOA;RHOC	Transforming protein RhoA;Rho-related GTP-binding protein RhoC	19	0	3117100	6048500	0	12662000	7608300	0.452169	0.414885
C9JBG5;Q8NBJ9;Q8NBJ9-2;F5H8L4	SIDT2	SID1 transmembrane family member 2	7	2429100	0	1488000	0	0	41711000	0.0939105	0.416684
O43281;O43281-3;O43281-2	EFS	Embryonal Fyn-associated substrate	30	120490000	66958000	74812000	264940000	62917000	106790000	0.603386	0.41722
P05783;F8VZY9;CON__H-INV:HIT000015463;CON__Q92764;C4AM86;CON__Q497I4;Q92764	KRT18	Keratin, type I cytoskeletal 18	33	726780000	585200000	693270000	702370000	610780000	1195200000	0.79943	0.419244
P05141;P12235;V9GYG0;Q9H0C2	SLC25A5;SLC25A4	ADP/ATP translocase 2;ADP/ATP translocase 2, N-terminally processed;ADP/ATP translocase 1	4	61200000	93066000	33198000	121280000	67861000	65740000	0.735496	0.420971
G3V1A4;E9PP50;E9PK25;P23528;E9PLJ3;E9PQB7;E9PS23;Q9Y281-3;Q9Y281	CFL1	Cofilin-1	26	12661000	7923600	12286000	0	11354000	10784000	1.4848	0.421038
Q06323-3;Q06323;Q06323-2;H0YLU2;H0YKK6	PSME1	Proteasome activator complex subunit 1	17	0	2683300	379360	0	719970	0	4.25387	0.421158
Q14677-3;Q14677-2;Q14677	CLINT1	Clathrin interactor 1	14	6193300	0	0	0	5278900	11179000	0.376312	0.422419
P02545;P02545-6;P02545-3;P02545-2;Q3BDU5;P02545-5;P02545-4;Q5TCI8;H0YAB0;A0A0C4DGC5	LMNA	Prelamin-A/C;Lamin-A/C	201	119490000	196590000	384960000	157560000	219470000	90808000	1.49847	0.422875
Q9H3N1;G3V448	TMX1	Thioredoxin-related transmembrane protein 1	4	2868200	0	0	26245000	0	0	0.109286	0.425938
Q09666;E9PJZ0;E9PKR9;E9PJC6;E9PLK4;Q09666-2;E9PQE3	AHNAK	Neuroblast differentiation-associated protein AHNAK	48	56526000	72755000	66219000	0	61127000	73314000	1.45417	0.429244
O94826	TOMM70A	Mitochondrial import receptor subunit TOM70	2	5535700	4836900	5878000	0	5092400	6115200	1.44996	0.429784
Q13283;D6R9X5;D6RB17;E5RJU8;E5RIZ6;D6RAC7;D6RGJ4;E5RH42;D6RBW8;E5RH00;E5RIF8;E5RI46;D6RBR0;D6REX8;D6RBM9;D6R9A4;Q13283-2;D6RE13	G3BP1	Ras GTPase-activating protein-binding protein 1	2	0	4608500	5125800	0	4134400	0	2.35446	0.431096
P47985;P0C7P4	UQCRFS1;UQCRFS1P1	Cytochrome b-c1 complex subunit Rieske, mitochondrial;Cytochrome b-c1 complex subunit 11;Putative cytochrome b-c1 complex subunit Rieske-like protein 1	8	5026100	7286400	7648200	0	9310100	3225700	1.5923	0.434188
P23246;P23246-2;H0Y9K7;H0Y9U2	SFPQ	Splicing factor, proline- and glutamine-rich	26	11101000	11395000	51283000	0	24684000	9646500	2.14908	0.434534
Q9NP58-4;Q9NP58;Q2M3G0-1;Q2M3G0	ABCB6	ATP-binding cassette sub-family B member 6, mitochondrial	16	26174000	19808000	12483000	0	22613000	15686000	1.52654	0.435829
P05023-4;P05023;P05023-3;P05023-2;A0A2R8YEY8;B1AKY9;M0R116;A0A0A0MT26;P50993;P13637;P13637-2;P13637-3;H0Y7C1;Q13733;M0QXF2;E9PRA5;P20648;Q5TC01;A0A669K9X0;P54707;P54707-2;Q5TC02	ATP1A1	Sodium/potassium-transporting ATPase subunit alpha-1	123	36898000	22966000	29168000	17546000	26908000	30274000	1.19141	0.438285
E9PB18;Q6UXG2-2;Q6UXG2-4;Q6UXG2;Q6UXG2-3;E9PMS2;E9PS21;E9PLY8;E9PLQ2	KIAA1324	UPF0577 protein KIAA1324	28	0	5100900	3985600	0	6644200	12457000	0.475703	0.442167
F6SFZ6;Q99571-3;Q99571;Q99571-2;F5H1M6	P2RX4	P2X purinoceptor;P2X purinoceptor 4	14	13539000	0	0	0	13082000	18570000	0.427745	0.444256
P61204-2;P84077;P61204;F5H423;F5H1V1;F5H6T5;F8WDB3;H0YGG7;F5H0C7;C9J1Z8	ARF3;ARF1	ADP-ribosylation factor 3;ADP-ribosylation factor 1	8	0	2804700	0	0	0	19017000	0.147484	0.446491
F8VWV4;F8VS58;F8VQY6;F8VPE8;F8VRK7;G3V210;F8VZS0;F8VU65;F8VWS0;P05388-2;P05388;F8VW21;Q8NHW5	RPLP0;RPLP0P6	60S acidic ribosomal protein P0;60S acidic ribosomal protein P0-like	37	0	19326000	18116000	0	13741000	4935100	2.00481	0.447273
H0YM31;Q16822-2;Q16822;H0YML5;Q16822-3	PCK2	Phosphoenolpyruvate carboxykinase [GTP], mitochondrial	11	5490000	0	0	0	0	821930	6.6794	0.447727
P62805	HIST1H4A	Histone H4	8	449870000	232150000	106700000	212860000	227540000	75475000	1.5289	0.459851
Q12906-5;Q12906-4;Q12906-2;Q12906-6;Q12906-3;Q12906;Q12906-7;K7EQR9;K7EKJ9;Q96SI9-2;Q96SI9	ILF3	Interleukin enhancer-binding factor 3	61	3186000	14585000	8465300	0	10514000	4762500	1.71743	0.46075
A0A2R8Y4F5;H0YFD6;P40939;A0A2R8YG21;A0A2R8Y688	HADHA	Trifunctional enzyme subunit alpha, mitochondrial;Long-chain enoyl-CoA hydratase;Long chain 3-hydroxyacyl-CoA dehydrogenase	30	13315000	11927000	15082000	0	16718000	11464000	1.43084	0.465267
P16278-3;P16278;E7EQ29;P16278-2;F8WF40;C9JF15;C9J539;C9JWX1;C9J4G9	GLB1	Beta-galactosidase	29	59841000	58845000	26567000	102310000	49981000	44641000	0.737579	0.465943
A0A6I8PRA0;A0A3B3IS06;E7ETY2;Q13428-8;Q13428-7;Q13428-3;Q13428-2;Q13428-6;Q13428;Q13428-4;H0Y8Y7;Q13428-5	TCOF1	Treacle protein	64	9818200	5294500	7965200	0	6397400	9322900	1.46803	0.466388
A0A0B4J1Z1;C9JAB2;Q16629-3;Q16629-2;Q16629-4;Q16629	SRSF7	Serine/arginine-rich splicing factor 7	12	1313500	13836000	7506300	0	7532400	4967100	1.81254	0.469087
P07900;P07900-2;G3V2J8;Q58FF6;Q58FG0;Q14568	HSP90AA1	Heat shock protein HSP 90-alpha	21	16463000	22627000	10337000	10737000	18337000	9641700	1.27667	0.470021
Q92484-2;Q92484	SMPDL3A	Acid sphingomyelinase-like phosphodiesterase 3a	12	248770000	49719000	44728000	66379000	20795000	88608000	1.95252	0.470506
C9J973;Q5JS37-2;Q5JS37	NHLRC3	NHL repeat-containing protein 3	6	0	28470000	2333600	0	8093500	0	3.80597	0.470874
Q96QK1;I3L4S0;A0A1W2PP10;A0A3B3ITD4	VPS35	Vacuolar protein sorting-associated protein 35	11	6908500	8039300	6418500	0	12557000	28395000	0.52174	0.471981
A0A1X7SBZ2;A0A5H1ZRQ2;Q92841-1;Q92841-3;Q92841-2;Q92841	DDX17	Probable ATP-dependent RNA helicase DDX17	12	4028100	0	7888700	0	5142700	0	2.31723	0.472601
Q9BTY2;Q9BTY2-2;Q7Z6V2	FUCA2	Plasma alpha-L-fucosidase	8	31838000	11699000	12235000	0	16354000	18478000	1.60117	0.473486
G3V203;J3QQ67;Q07020;F8VYV2;A0A075B7A0;H0YHA7;Q07020-2;F8VUA6;F8VXR6	RPL18	60S ribosomal protein L18	35	14348000	0	0	0	12882000	18819000	0.452604	0.474169
P10253;I3L0S5;I3L3L3;I3L2V9	GAA	Lysosomal alpha-glucosidase;76 kDa lysosomal alpha-glucosidase;70 kDa lysosomal alpha-glucosidase	25	301040000	439360000	183610000	36602000	311980000	300140000	1.42435	0.474486
P35579;P35579-2;P35749-4;P35749-3;P35749;P35749-2;A0A0C4DFM8;Q7Z406;P35580-4;Q7Z406-6;P35580-3;P35580;P35580-2;P35580-5;Q7Z406-4;Q7Z406-5;Q7Z406-2	MYH9	Myosin-9	52	11140000	12800000	20296000	0	17918000	12159000	1.47076	0.474489
Q10567-4;Q10567-3;Q10567-2;Q10567	AP1B1	AP-1 complex subunit beta-1	10	3620900	11275000	5411500	2704500	9208900	24852000	0.552351	0.475068
P20042	EIF2S2	Eukaryotic translation initiation factor 2 subunit 2	3	0	1923600	2814500	0	2161300	0	2.19225	0.47831
B4DLR8;H3BNV2;P15559-3;P15559-2;P15559;H3BRK3	NQO1	NAD(P)H dehydrogenase [quinone] 1	11	0	4707800	5254800	0	8509500	9543100	0.551865	0.478468
Q9HCY8	S100A14	Protein S100-A14	3	60053000	31783000	19730000	0	27598000	43393000	1.57155	0.480947
Q9NXC5-2;Q9NXC5	MIOS	WD repeat-containing protein mio	8	3745700	0	0	0	3680500	4333300	0.467406	0.482114
Q32Q12;P22392;P22392-2;O60361	NME1-NME2;NME2;NME2P1	Nucleoside diphosphate kinase;Nucleoside diphosphate kinase B;Putative nucleoside diphosphate kinase	4	4554800	19905000	8981500	0	11949000	8222700	1.65783	0.485915
P27105;F8VSL7;P27105-2	STOM	Erythrocyte band 7 integral membrane protein	15	160330000	313000000	292940000	130900000	407770000	510700000	0.730219	0.486091
Q9NQ11-2;Q9NQ11-3;Q9NQ11;H0Y8I1;H0Y953	ATP13A2	Probable cation-transporting ATPase 13A2	29	3871000	0	0	0	3825700	4383500	0.471544	0.486324
P09669	COX6C	Cytochrome c oxidase subunit 6C	2	6117900	1792900	0	0	13673000	4212600	0.4423	0.494833
P23284	PPIB	Peptidyl-prolyl cis-trans isomerase B	6	15164000	35820000	29648000	0	34057000	20428000	1.47989	0.495514
A0A0G2JNZ5;A0A0G2JNZ0;A0A0G2JLB3;P04062-4;P04062-5;P04062-2;P04062;P04062-3	GBA	Glucosylceramidase	53	192900000	115280000	92963000	87531000	101010000	136970000	1.23235	0.495861
O00462;A0A2R8Y524;A0A2R8YEC9;E9PFW2;A0A2R8YCE9;A0A2R8Y4U7;A0A2R8YE79;A0A2R8Y211;A0A2R8Y7A7;A0A2R8Y7A0;A0A2R8Y7N1;Q5T6H3;Q9NQW7-2;Q9NQW7;Q9NQW7-4;Q9NQW7-3;Q5T6H2	MANBA	Beta-mannosidase	91	92446000	73355000	59789000	61587000	94441000	106030000	0.86084	0.498151
J3KSR8;J3KTL2;Q07955;Q07955-3;Q07955-2	SRSF1	Serine/arginine-rich splicing factor 1	8	0	4457600	6980000	0	5381600	0	2.12532	0.49876
Q8WUH6	TMEM263	Transmembrane protein 263	2	11625000	0	4770300	0	5247100	2958500	1.99806	0.50156
P20700;E9PBF6;A0A0D9SFE5;A0A0D9SFY5	LMNB1	Lamin-B1	55	19424000	30502000	74141000	0	47367000	28963000	1.6254	0.503241
H7BZ94;P07237;H0Y3Z3;I3L0S0;I3L398;I3NI03;I3L3U6;I3L312;I3L1Y5;I3L514;I3L4M2;I3L3P5	P4HB	Protein disulfide-isomerase	52	51618000	65515000	90026000	0	82805000	63890000	1.41217	0.503561
P0CG48;M0R2S1;Q96C32;Q5PY61;J3QKN0;F5GXK7;F5H747;A0A2R8Y422;F5H388;B4DV12;F5H265;F5H2Z3;F5GYU3;F5H6Q2;M0R1M6;J3QTR3;J3QS39;P62987;P62979;P0CG47;Q49A90;M0R1V7;F5GZ39;J3QSA3	UBC;UBA52;UBB;RPS27A	Polyubiquitin-C;Ubiquitin;Ubiquitin-60S ribosomal protein L40;Ubiquitin;60S ribosomal protein L40;Ubiquitin-40S ribosomal protein S27a;Ubiquitin;40S ribosomal protein S27a;Polyubiquitin-B;Ubiquitin	66	0	125830000	236910000	0	168010000	0	2.15904	0.503631
Q9UHB9-4;Q9UHB9;Q9UHB9-2	SRP68	Signal recognition particle subunit SRP68	7	4363700	3427000	3110600	0	3908100	3982900	1.38149	0.50395
A0A087WTP3;Q92945;M0QXW7;M0QYH3;M0R0I5	KHSRP	Far upstream element-binding protein 2	12	2560500	3636800	0	0	2976000	0	2.08243	0.504343
Q12797-10;Q12797;E5RHK2;A0A087WW51	ASPH	Aspartyl/asparaginyl beta-hydroxylase	10	0	4479300	6224000	0	5160700	0	2.074	0.505525
Q8IV36-2;Q8IV36;Q8IV36-3;E9PIM7;J3KSF1;E9PMS4	HID1	Protein HID1	25	7395000	8643300	7553800	4195000	14538000	11563000	0.77872	0.510774
Q9Y6H1;Q5T1J5	CHCHD2;CHCHD2P9	Coiled-coil-helix-coiled-coil-helix domain-containing protein 2;Putative coiled-coil-helix-coiled-coil-helix domain-containing protein CHCHD2P9, mitochondrial	4	3274600	5392400	4658800	0	0	7665000	1.73853	0.512658
Q5JNZ5;P62854	RPS26P11;RPS26	Putative 40S ribosomal protein S26-like 1;40S ribosomal protein S26	6	17093000	0	4404100	0	3967000	5895200	2.17975	0.513065
P36578;H3BM89;H3BU31;H3BTP7	RPL4	60S ribosomal protein L4	10	24634000	25974000	30778000	23647000	26744000	26469000	1.05889	0.514404
A0A0J9YYL3;A0A0J9YXJ8;A0A0J9YVP6;A0A0J9YXX5;Q9UHX1-4;Q9UHX1-6;Q9UHX1-3;Q9UHX1-5;Q9UHX1-2;Q9UHX1	PUF60	Poly(U)-binding-splicing factor PUF60	30	0	1195100	0	0	4564600	0	0.261819	0.514616
Q9UBX3-2;Q9UBX3;F6RGN5	SLC25A10	Mitochondrial dicarboxylate carrier	3	0	937450	716050	0	0	5844900	0.282896	0.517093
C9J6B1;C9JQB3;P11234;P11234-3;P11234-2;F8WEQ6;C9JYR1;H7C3P7	RALB	Ras-related protein Ral-B	12	36423000	9980900	9654800	16467000	10890000	9292800	1.52958	0.517747
P02794;E9PRK8;E9PKY7;G3V192;E9PQR3;E9PKM5;E9PK45;G3V1D1;E9PPQ4	FTH1	Ferritin heavy chain;Ferritin heavy chain, N-terminally processed;Ferritin	23	9560100	13169000	9641800	0	19690000	33485000	0.608762	0.517772
P13674-3;P13674-2;P13674	P4HA1	Prolyl 4-hydroxylase subunit alpha-1	12	0	0	2712600	0	10117000	0	0.268123	0.518629
C9J050;C9JEJ2;P49585;H7C1T3;H7BZN1;Q9Y5K3-2;Q9Y5K3-4;Q9Y5K3-3;Q9Y5K3;C9JPY0;C9J2E1	PCYT1A;PCYT1B	Choline-phosphate cytidylyltransferase A;Choline-phosphate cytidylyltransferase B	48	49008000	47614000	34596000	34125000	51238000	69245000	0.848714	0.522201
F8VRN8;Q9UHB6;Q9UHB6-4;F8VTU2;F8VS07;F8VQE1;Q9UHB6-3;Q9UHB6-2;Q9UHB6-5	LIMA1	LIM domain and actin-binding protein 1	12	0	3465500	4772700	0	4100200	0	2.00922	0.523147
H0Y449;P67809;A0A0D9SEI8;C9J5V9;P16989-2;P16989-3;Q9Y2T7;P16989	YBX1	Nuclease-sensitive element-binding protein 1	16	0	9314000	9811800	0	9634700	0	1.9851	0.523166
Q92522	H1FX	Histone H1x	4	3738600	215300000	0	60555000	5702900	0	3.30585	0.527701
Q9P206;Q9P206-3;Q9P206-2	KIAA1522	Uncharacterized protein KIAA1522	9	2933800	0	0	0	2018500	4081500	0.480951	0.528562
P31930	UQCRC1	Cytochrome b-c1 complex subunit 1, mitochondrial	7	0	15457000	15027000	0	15550000	0	1.96039	0.530548
A0A3B3ITZ9;Q9Y2W1	THRAP3	Thyroid hormone receptor-associated protein 3	4	0	3143800	3926800	3592500	0	0	1.96816	0.531602
O14662-2;B7ZBM4;B7ZBM5;Q96NX8;F8W9Z6;B7ZBM8;H3BU86;O14662-6;O14662-4;O14662-5;O14662	STX16;STX16-NPEPL1	Syntaxin-16	12	0	1596500	1681800	0	1683000	0	1.94789	0.534559
P42345;B1AKP8;B1AKQ2	MTOR	Serine/threonine-protein kinase mTOR	14	10464000	9728900	10104000	12355000	6999800	7444300	1.13052	0.53703
P0DP25;P0DP24;P0DP23;E7EMB3;A0A590UJC0;G3V226;G3V361;A0A590UJI2;Q96HY3;F8WBR5;M0QZ52;G3V479	CALM2;CALM1		43	1791300	28618000	22271000	0	27974000	0	1.88319	0.541306
A0A5F9ZHN7;Q9NTJ5;E9PGZ4;Q9NTJ5-2;F8WCQ2;C9JV50;F8WDN7	SACM1L	Phosphatidylinositide phosphatase SAC1	13	0	6026900	6155300	0	6329600	0	1.92464	0.54174
E7EPM6;P33121-3;P33121;D6RER0;B7Z3Z9;P33121-2;D6RG07	ACSL1	Long-chain-fatty-acid--CoA ligase 1	22	8584500	9357900	10796000	0	11530000	9973700	1.33644	0.546966
C9J9K3;A0A0C4DG17;P08865;F8WD59	RPSA	40S ribosomal protein SA	7	0	12277000	11930000	46172000	7136700	0	0.454091	0.550693
H0YCY8;P53634	CTSC	Dipeptidyl peptidase 1;Dipeptidyl peptidase 1 exclusion domain chain;Dipeptidyl peptidase 1 heavy chain;Dipeptidyl peptidase 1 light chain	4	0	29085000	12704000	0	20635000	0	2.02515	0.551936
P11279;P11279-2	LAMP1	Lysosome-associated membrane glycoprotein 1	8	235890000	152630000	251680000	516180000	156080000	196920000	0.736556	0.552702
D6R9P3;D6RD18;D6RBZ0;Q99729-3;Q99729-2;Q99729-4;Q99729	HNRNPAB	Heterogeneous nuclear ribonucleoprotein A/B	19	4253500	2668700	13155000	0	8236300	4012300	1.63914	0.553323
P11021	HSPA5	78 kDa glucose-regulated protein	11	40121000	26976000	43214000	29541000	44242000	52626000	0.872651	0.556991
O60784-3;O60784;O60784-4;O60784-2;B0QY01;V9GZ68;H7BYN7;V9GYF4;B0QY02;Q6UW50	TOM1	Target of Myb protein 1	25	19794000	14060000	10618000	0	16552000	16480000	1.34633	0.567075
A0A087WZ13;E9PAU2;Q8IY67-2;Q8IY67;K7EKR9;Q8IY67-3;K7EQG2	RAVER1	Ribonucleoprotein PTB-binding 1	41	60788000	16038000	19687000	0	13956000	45710000	1.61755	0.567086
A0A087WU53;Q9H0U3;Q9H0U3-2	MAGT1	Magnesium transporter protein 1	5	12091000	0	1767900	0	4129100	2372600	2.13158	0.568847
O00567;A0A494C128;Q5JXT2;H0Y653;H0YDU4	NOP56	Nucleolar protein 56	21	1589800	6405700	7966200	2464100	6147000	3282900	1.342	0.574382
E9PS95;A0A0D9SEI9;A0A0D9SFE1;E9PJH7;Q9H1K4;Q9H936;K4DIB6;K4DIB3;K4DIB8;K4DIA8	SLC25A22;SLC25A18	Mitochondrial glutamate carrier 2;Mitochondrial glutamate carrier 1	16	5246900	0	5023100	0	4034400	2479000	1.57675	0.579101
P30101;H7BZJ3	PDIA3	Protein disulfide-isomerase A3	17	86626000	89262000	103630000	72567000	119540000	116460000	0.905858	0.579169
O43278-2;H3BVD9;O43278;H3BR01;H3BTQ8;H3BMB6;H3BSM2;H3BNW5	SPINT1	Kunitz-type protease inhibitor 1	27	0	7328500	7245900	0	8086100	0	1.8024	0.583232
M0QZC5;P62280;M0R1H6;M0R1H5	RPS11	40S ribosomal protein S11	13	12267000	0	0	0	10308000	11834000	0.554015	0.583439
E7ET49;Q8NCG7-2;Q8NCG7-4;Q8NCG7	DAGLB	Sn1-specific diacylglycerol lipase beta	8	0	0	3860700	0	0	1413600	2.73111	0.583745
Q14554-2;Q14554	PDIA5	Protein disulfide-isomerase A5	4	0	0	4094400	0	1507900	0	2.7153	0.585209
P08754	GNAI3	Guanine nucleotide-binding protein G(k) subunit alpha	3	8831100	20822000	19070000	3332100	14802000	19740000	1.28645	0.587068
H7BY10;K7EJV9;K7ERT8;A8MUS3;P62750;K7EMA7	RPL23A	60S ribosomal protein L23a	34	60156000	45501000	45231000	76612000	42648000	51412000	0.884082	0.591169
P41091;Q2VIR3;H7BZU1;Q2VIR3-2	EIF2S3;EIF2S3L	Eukaryotic translation initiation factor 2 subunit 3;Putative eukaryotic translation initiation factor 2 subunit 3-like protein	7	2101700	4038800	3686600	0	5320700	9359100	0.66943	0.591222
P16401	HIST1H1B	Histone H1.5	4	37856000	110790000	99098000	0	108620000	71054000	1.37885	0.592481
P50402;Q5HY57	EMD	Emerin	13	36904000	30665000	54661000	54191000	30590000	13412000	1.24479	0.593533
F5GX19;F5H3Y3;Q6IAA8;H0YFI1;F5H479	LAMTOR1	Ragulator complex protein LAMTOR1	23	99753000	0	0	0	81896000	95202000	0.563264	0.594421
P51608;P51608-2;I6LM39;A0A087X1U4	MECP2	Methyl-CpG-binding protein 2	6	0	0	2516400	0	978670	0	2.57124	0.599458
E9PKZ0;P62917;G3V1A1;E9PKU4;E9PP36	RPL8	60S ribosomal protein L8	11	18420000	23175000	23677000	0	22809000	27711000	1.292	0.602159
O75815;O75815-3;O75815-2	BCAR3	Breast cancer anti-estrogen resistance protein 3	45	46440000	39718000	37527000	0	47642000	48624000	1.28483	0.604256
Q15424-2;Q15424;Q15424-4;Q15424-3;K7EII0	SAFB	Scaffold attachment factor B1	9	0	1209500	1111100	0	1329400	0	1.7456	0.604686
B1AP22;P49810-3;P49810;E5RHT1;E5RFW4;E5RG63;E7ES96;P49768-3;P49768-5;P49768-6;P49810-2;P49768-2;P49768	PSEN2;PSEN1	Presenilin;Presenilin-2;Presenilin-2 NTF subunit;Presenilin-2 CTF subunit;Presenilin-1;Presenilin-1 NTF subunit;Presenilin-1 CTF subunit;Presenilin-1 CTF12	16	2366000	2034400	6751400	0	6651200	0	1.67666	0.606547
Q5TEC6;A0A590UJL8	HIST2H3PS2	Histone H3	2	126840000	0	85679000	0	0	492200000	0.431774	0.609062
D6RHI9;A0A087WZM2;O00584;D6REQ6;H0YAE9;J3QQ64;A0A087WWI1;O00584-2	RNASET2	Ribonuclease T2	30	60678000	27994000	20395000	0	38999000	40084000	1.37915	0.609648
P32322;P32322-3;E2QRB3;P32322-2;J3QL24;J3KQ22;J3QR88;J3QLK9;J3QL23;J3QL32;J3QKT4;J3KTA8;J3QKT3;J3KSA9;J3QRZ0	PYCR1	Pyrroline-5-carboxylate reductase 1, mitochondrial;Pyrroline-5-carboxylate reductase	49	10271000	11830000	12899000	7678000	13623000	19328000	0.861454	0.615307
A0A2R8YGD1;A0A2R8YD45;O14773-2;O14773;A0A2R8Y7U1;A0A2R8YDY1;A0A2R8Y7I4	TPP1	Tripeptidyl-peptidase 1	16	0	128720000	27396000	0	57183000	29653000	1.79783	0.615636
O00391-2;O00391	QSOX1	Sulfhydryl oxidase 1	4	2075600	0	0	0	1563100	2004400	0.581808	0.617924
Q96T51-2;Q96T51;H0YA47;H0YAC8;J3KPP6;Q96T51-3;Q7L099;Q7L099-2;Q7L099-4;Q7L099-3	RUFY1	RUN and FYVE domain-containing protein 1	12	0	2559800	5444000	0	4493400	0	1.78123	0.618599
A0A075B7D9;Q92804-2;Q92804;A0A075B7E4;A0A075B7F2	TAF15	TATA-binding protein-associated factor 2N	8	0	4584800	7421000	0	6918400	0	1.73534	0.620085
P09874;Q5VX84;Q5VX85	PARP1	Poly [ADP-ribose] polymerase 1	16	20080000	33431000	33922000	84390000	23062000	15744000	0.709706	0.620251
P25685;M0R080;P25685-2	DNAJB1	DnaJ homolog subfamily B member 1	5	0	4409200	2896400	0	0	4236100	1.72461	0.621449
Q96A49	SYAP1	Synapse-associated protein 1	4	7106200	0	2483700	0	4996300	10400000	0.62287	0.624385
Q15833-2;Q15833;Q15833-3;M0R0M7;M0R1A1;R4GMY7;M0R0D4;M0QZ54;M0R118;A0A087WUN8	STXBP2	Syntaxin-binding protein 2	39	10669000	4336600	5338600	0	9736600	20489000	0.673078	0.625253
O95837;P29992;P50148	GNA14;GNA11;GNAQ	Guanine nucleotide-binding protein subunit alpha-14;Guanine nucleotide-binding protein subunit alpha-11;Guanine nucleotide-binding protein G(q) subunit alpha	5	1504800	1687000	1472800	0	2406500	1167800	1.30504	0.63008
E9PN17;A0A3B3ITX4;O75964;A0A3B3IRW3	ATP5L	ATP synthase subunit g, mitochondrial	7	0	10968000	13958000	0	14811000	0	1.68294	0.63183
P30050;P30050-2	RPL12	60S ribosomal protein L12	5	10930000	14666000	11843000	0	21071000	6737600	1.34631	0.637918
P04181;P04181-2	OAT	Ornithine aminotransferase, mitochondrial;Ornithine aminotransferase, hepatic form;Ornithine aminotransferase, renal form	4	5870600	5936600	5039700	0	6115800	7329000	1.25304	0.645902
A0A140T921;A0A140T9H5;A0A140T9U8;O19617;A2AEA2;P10321;P10321-2;A0A1W2PRU9;A0A140TA05;A0A140T9L3;A0A140T913;A0A140T942;A0A140T9I0;Q53Z42;A0A1W2PRT9;A0A1W2PPQ2;A0A140T9X5;A0A140T9E1;A0A140T933;A0A140T9M5;A0A140TA21;A0A140T955;A0A140T9D4;F6U0H7;A0A140T9T1;A0A140TA13;A0A140TA12;A0A140TA03;A0A140TA02;A0A140TA19;A0A0G2JPD3;A0A140T975;Q5SPM2;A0A140T941;B0UXQ0;A0A140T8Y4;A0A1W2PNR7;A0A140T9Z6;A0A1W2PPF8;…	HLA-C	HLA class I histocompatibility antigen, Cw-7 alpha chain	24	5909500	6537400	5678400	0	14573000	9886100	0.741045	0.649361
P61224;P62834;F5H7Y6;P61224-3;E7ESV4;P61224-2;F5GX62;F5H004;F5GYB5;A0A075B6Q0;F5H4H0;F5H6R7;F5H500;F5H0B7;F5H491;F5GWU8;F5H077;F5GYH7;P61224-4;A6NIZ1;F5H823;B7ZB78;F5GZG1;F8WBC0	RAP1B;RAP1A	Ras-related protein Rap-1b;Ras-related protein Rap-1A;Ras-related protein Rap-1b-like protein	69	28635000	25530000	24933000	0	30468000	32988000	1.2465	0.650453
P61106;X6RFL8	RAB14	Ras-related protein Rab-14	16	45778000	52408000	33038000	47365000	38287000	56796000	0.921206	0.656558
P62851	RPS25	40S ribosomal protein S25	2	9568500	2506100	13880000	0	16793000	0	1.54556	0.66322
A2A274;Q99798	ACO2	Aconitate hydratase, mitochondrial	24	28248000	28324000	26016000	0	31011000	35793000	1.23627	0.664217
Q9BV36-2;Q9BV36;Q9BV36-3;Q9BV36-4;H7C2D8;Q9BV36-5;H7C3K9;H7C052;H7C371;C9JI01;C9JKV5;H7C190	MLPH	Melanophilin	57	1615600	19555000	19066000	0	16458000	12950000	1.36822	0.665105
E9PB61;Q86V81	ALYREF	THO complex subunit 4	2	0	9984200	3356600	0	5465400	3222600	1.53554	0.666057
Q9Y2Q5-2;Q9Y2Q5;Q9Y2Q5-3	LAMTOR2	Ragulator complex protein LAMTOR2	5	7532600	0	3826200	0	22017000	0	0.51591	0.666681
Q9P2E9-3;Q9P2E9;A0A087WVV2;F8W7S5;A0A087WU26;A2A2S5;V9GY78;Q8N4C6-6;C9J066;E9PN67;H9KV85;Q8N4C6-11;H0YDJ4;Q8N4C6-4;Q8N4C6-9;Q8N4C6-2;Q8N4C6;Q8N4C6-5;Q8N4C6-10;Q8N4C6-7	RRBP1	Ribosome-binding protein 1	76	11453000	12714000	18413000	0	20515000	13316000	1.25861	0.671286
A0A3B3IUB5;Q8TCT9-5;Q8TCT9;Q8TCT9-2;A0A0C4DGU3;A0A075B6F6;A0A0S2Z6F0;A0A3B3IT72;Q8TCT9-4	HM13	Minor histocompatibility antigen H13	13	0	5598700	6293700	0	7509600	0	1.58363	0.671616
Q9Y277;Q9Y277-2;E5RHE1;E5RK27;E5RFP6;E5RJN6;E5RHZ6	VDAC3	Voltage-dependent anion-selective channel protein 3	9	18078000	9914900	5967600	0	18808000	26831000	0.744111	0.678197
A0A1W2PPX5;A0A1W2PPU6;A0A1W2PQR6;A0A1W2PQB7;A0A1W2PS43;A0A1W2PRS1;Q14108;A0A1W2PSE4;Q14108-2;A0A1W2PS70;A0A1W2PNX7;D6RDG0;A0A1W2PRF6;A0A1W2PQL5	SCARB2	Lysosome membrane protein 2	81	161530000	316490000	185700000	91350000	282230000	192510000	1.17246	0.679576
A0A2R8Y6A7;A0A2R8YD12;A0A024QZX5;A0A087X1N8;P35237	SERPINB6	Serpin B6	10	0	4206100	5266500	0	6068400	0	1.56097	0.68326
Q93050-1;Q93050;Q93050-3;B7Z641;B7Z2A9;K7EPG4;K7EM24;K7EN36;F5H1T6;K7ERA0;K7ERA6	ATP6V0A1	V-type proton ATPase 116 kDa subunit a isoform 1;V-type proton ATPase subunit a	42	21361000	12896000	13895000	20632000	11692000	10368000	1.12789	0.686155
J3KQL8;Q9BQE5	APOL2	Apolipoprotein L2	4	0	1340500	0	0	2617000	0	0.512228	0.686583
J3QLD9;E7EMK3;Q14254;K7EKW9	FLOT2	Flotillin-2	54	208600000	157850000	150060000	288940000	170810000	124650000	0.88383	0.687263
A0A0G2JIW1;P0DMV9;P0DMV8;P0DMV8-2;V9GZ37;Q53FA3;P34931	HSPA1B;HSPA1A	Heat shock 70 kDa protein 1B;Heat shock 70 kDa protein 1A	39	13529000	50459000	34630000	37617000	36599000	38239000	0.876955	0.688844
Q9UHG3;F8W8W4;Q9UHG3-2;C9K055;C9JGT6;C9JM55	PCYOX1	Prenylcysteine oxidase 1	26	54090000	31982000	29611000	0	39997000	52801000	1.24661	0.688847
O15118;K7EQ23;O15118-2	NPC1	Niemann-Pick C1 protein	8	21461000	0	0	0	11152000	0	1.92441	0.691866
Q99459	CDC5L	Cell division cycle 5-like protein	2	6763500	0	2558300	0	5836900	0	1.59705	0.696494
Q9NRY5;E5RK42;E5RHP2;E5RHI8;E5RFK2;E5RGF9;E7ESJ7	FAM114A2	Protein FAM114A2	8	961880	1409600	2942900	0	3216900	3732200	0.764758	0.699374
A0A087WYR3;O43399;O43399-5;O43399-7;O43399-6;O43399-2;O43399-4;O43399-3;A0A087WZ51	TPD52L2	Tumor protein D54	21	10076000	2493900	5407100	15047000	3807400	4421000	0.772361	0.700029
A0A0A0MRX2;Q96HY6-2;Q96HY6	DDRGK1	DDRGK domain-containing protein 1	6	2221400	0	0	0	4165300	0	0.533311	0.701605
P12532;C9JSQ1;F8WCN3;P12532-2;C9J8F6;C9JT96;C9JJX8;C9J995;C9J6W7;P17540;D6RHV3;D6R998	CKMT1A;CKMT1B	Creatine kinase U-type, mitochondrial	49	40224000	42572000	46173000	0	48580000	58118000	1.20873	0.702375
E9PKE3;P11142;E9PNE6;P11142-2;E9PN89;E9PPY6;E9PQQ4;E9PQK7;E9PK54;E9PLF4;E9PN25;A8K7Q2;E9PS65;P54652;E9PM13;E9PI65	HSPA8	Heat shock cognate 71 kDa protein	92	109660000	125250000	106770000	24609000	143180000	127800000	1.15593	0.70424
Q96GS4	C17orf59	Uncharacterized protein C17orf59	7	27276000	12461000	21364000	22122000	25389000	19283000	0.914768	0.704281
Q14697;Q14697-2;F5H6X6;E9PKU7;E9PNH1	GANAB	Neutral alpha-glucosidase AB	34	10700000	12138000	11840000	9178000	12997000	14476000	0.946168	0.708581
P22626;P22626-2;A0A087WUI2	HNRNPA2B1	Heterogeneous nuclear ribonucleoproteins A2/B1	25	56222000	74165000	172710000	15497000	160570000	60769000	1.27978	0.713903
P08236-3;P08236;P08236-2;F8WBK6;F2Z3L6	GUSB	Beta-glucuronidase	19	2790800	56410000	10230000	0	30200000	17173000	1.46562	0.717281
P26373;P26373-2;J3QSB4;H3BTH3;J3KS98	RPL13	60S ribosomal protein L13	14	43274000	15727000	8043500	0	19508000	31269000	1.32037	0.719278
P35232;C9JW96;C9JZ20;E7ESE2;E9PCW0;D6RBK0;P35232-2	PHB	Prohibitin	48	39175000	47980000	25556000	43343000	35427000	24143000	1.09521	0.722752
B4DNK4;P14618-2;P14618;H3BTN5;H3BR70;P14618-3;H3BQ34;H3BU13;H3BT25;H3BUW1;H3BTJ2;H3BN34;H3BQZ3;P30613-2;P30613	PKM	Pyruvate kinase;Pyruvate kinase PKM	52	29329000	15238000	9717800	0	20396000	23214000	1.24478	0.723111
P10412;P16402;P22492;Q02539	HIST1H1E;HIST1H1D	Histone H1.4;Histone H1.3	2	310980000	300150000	335590000	432970000	299040000	272400000	0.942563	0.724141
Q9BV40;B8ZZT4;C9JXZ5	VAMP8	Vesicle-associated membrane protein 8	13	42922000	55406000	117320000	16095000	94968000	67543000	1.2074	0.724216
P30040;F8W1G0	ERP29	Endoplasmic reticulum resident protein 29	3	0	4499500	5351500	0	6705200	0	1.46916	0.725577
P17987;F5H282;E7EQR6;E7ERF2;F5GYL4;F5H726;F5GZI8;F5H676;F5H136;F5GZ03	TCP1	T-complex protein 1 subunit alpha	15	5526100	0	3135900	0	3387000	3095200	1.33627	0.726016
J3KPS3;P04075;H3BQN4;P04075-2;H3BPS8;H3BUH7;H3BMQ8;H3BR04;H3BR68;H3BU78;P09972;A0A087WXX2;A0A3B3IS80;P05062	ALDOA	Fructose-bisphosphate aldolase;Fructose-bisphosphate aldolase A	96	390080000	149140000	181890000	418590000	189520000	229100000	0.861325	0.727173
Q8WUF5;K7EN03	PPP1R13L	RelA-associated inhibitor	4	5908500	0	0	0	3406200	0	1.73463	0.732275
P51798;P51798-2;H0Y2M6	CLCN7	H(+)/Cl(-) exchange transporter 7	16	32483000	21213000	13931000	0	20802000	34367000	1.22582	0.733164
F5GY55;Q16531	DDB1	DNA damage-binding protein 1	4	5469800	0	0	0	3573500	4377800	0.687913	0.73356
B4DKB2;A0A3B3ISF9;P42892-3;P42892-2;P42892-4;P42892	ECE1	Endothelin-converting enzyme 1	18	0	3236600	2687300	0	0	4094900	1.44665	0.736836
P18124;A8MUD9;C9JIJ5	RPL7	60S ribosomal protein L7	8	14746000	20040000	14785000	0	20962000	20860000	1.18529	0.737526
P27824;P27824-2;P27824-3;D6RGY2;H0Y9Q7;D6RFL1;D6RB85;D6RDP7;D6RAU8;H0Y9H1;D6RAQ8	CANX	Calnexin	64	20096000	16913000	38613000	5607700	20251000	37599000	1.19169	0.741272
Q9UJV9;A0A499FJW5;H0YA06;D6RGI7;H0Y8L8	DDX41	Probable ATP-dependent RNA helicase DDX41	26	18288000	31271000	25094000	15955000	29701000	36545000	0.908176	0.741685
Q9BQS8;Q9BQS8-4	FYCO1	FYVE and coiled-coil domain-containing protein 1	4	1820100	0	2094100	0	2965700	2113700	0.770603	0.741741
P62753;A2A3R7;A2A3R5	RPS6	40S ribosomal protein S6	4	0	6519800	7750200	0	9949600	0	1.43423	0.742917
Q9UHL4;R4GNE8;R4GN05;R4GMR2;R4GMU5;R4GMV4	DPP7	Dipeptidyl peptidase 2	16	333430000	254850000	225090000	381510000	258420000	232210000	0.932614	0.74514
Q9HDC9;H0Y512;Q9HDC9-2	APMAP	Adipocyte plasma membrane-associated protein	19	18374000	15700000	20931000	0	24199000	22509000	1.17764	0.745305
P62820;E7END7;P62820-2;P62820-3	RAB1A	Ras-related protein Rab-1A	10	136880000	50201000	127780000	247180000	62247000	72730000	0.823905	0.750969
Q16891-2;Q16891;B9A067;Q16891-3;Q16891-4;C9J406;H7C463;A0A087WYS0;D6RAW4	IMMT	MICOS complex subunit MIC60	76	16826000	12850000	17365000	0	18001000	22129000	1.17222	0.75664
F8W1A4;P54819-5;P54819-2;P54819;F8VY04;A0A5K1VW67;P54819-3;G3V213;F8VZG5;A0A5F9ZHP2;P54819-6;P54819-4;F8VPP1	AK2	Adenylate kinase 2, mitochondrial;Adenylate kinase 2, mitochondrial;Adenylate kinase 2, mitochondrial, N-terminally processed	60	14357000	9001100	10430000	6760800	11825000	12761000	1.07788	0.757126
O75844	ZMPSTE24	CAAX prenyl protease 1 homolog	3	0	3985800	5590400	0	6789800	0	1.41038	0.757411
Q9BRX9;H0YIE8	WDR83	WD repeat domain-containing protein 83	3	0	5019400	7359000	0	8787400	0	1.40865	0.759139
P62701;C9JEH7;P22090;Q8TD47	RPS4X;RPS4Y1;RPS4Y2	40S ribosomal protein S4, X isoform;40S ribosomal protein S4, Y isoform 1;40S ribosomal protein S4, Y isoform 2	12	0	5698600	6063900	0	6558400	8356900	0.78862	0.759782
F5GXX5;P61803;F5H895;A0A0B4J239	DAD1	Dolichyl-diphosphooligosaccharide--protein glycosyltransferase subunit DAD1	6	0	6911900	0	0	0	11209000	0.616638	0.760549
C9JXK0;A0A494C1L1;Q14739;C9JES9	LBR	Lamin-B receptor	7	0	2126000	5516100	0	5308100	0	1.43971	0.761073
A0A087WZR9;Q96C36;A0A087WX69;A0A087WZF0;A0A087WTV6	PYCR2	Pyrroline-5-carboxylate reductase;Pyrroline-5-carboxylate reductase 2	7	3570400	3032100	2769000	0	3870400	4172700	1.16516	0.76171
Q9UIQ6-3;Q9UIQ6-2;Q9UIQ6	LNPEP	Leucyl-cystinyl aminopeptidase;Leucyl-cystinyl aminopeptidase, pregnancy serum form	18	2863200	6731300	4407600	0	6255100	10999000	0.811523	0.76433
A0A075B730;P58107	EPPK1	Epiplakin	22	5868900	14180000	10883000	0	13468000	24706000	0.810287	0.764851
J3KS22;J3QS36;Q7Z4W1;J3QS45;J3KRZ4;J3KSZ5;J3QL34	DCXR	L-xylulose reductase	37	39098000	14644000	10519000	30600000	9726200	13743000	1.1885	0.772345
Q86UE4;E5RJU9;H0YB56	MTDH	Protein LYRIC	10	2131300	0	7713800	0	8798700	4209900	0.756815	0.773669
Q8N1F8;H7C2J7;H7C236	STK11IP	Serine/threonine-protein kinase 11-interacting protein	11	20547000	6026500	10804000	9366800	10615000	13357000	1.12114	0.776469
Q14204;A0A2R8YGC7;A0A2R8Y542;A0A2R8Y5T0;A0A2R8YFZ7;A0A2R8Y706	DYNC1H1	Cytoplasmic dynein 1 heavy chain 1	8	2204900	1803100	1964600	0	2648900	2534700	1.15221	0.778083
P36543-3;P36543-2;P36543;C9J8H1;Q96A05	ATP6V1E1	V-type proton ATPase subunit E 1	15	8020100	2774900	3714900	12553000	0	5516200	0.803018	0.78022
P38117-2;P38117;M0QY67	ETFB	Electron transfer flavoprotein subunit beta	10	4472000	15050000	15460000	0	17417000	11952000	1.19112	0.780438
Q9NSE4	IARS2	Isoleucine--tRNA ligase, mitochondrial	5	3003900	4311900	7158100	4031300	4539400	4798300	1.08265	0.782395
H7C4H2;Q9Y5M8	SRPRB	Signal recognition particle receptor subunit beta	4	2957900	1617000	2156900	0	4808000	3206400	0.839963	0.785091
A0A087WYW6;Q96A33;Q96A33-2;J3QR89	CCDC47	Coiled-coil domain-containing protein 47	12	0	2489900	4770600	0	5312000	0	1.36681	0.786577
H0YEN5;P15880;I3L404;E9PM36;E9PMM9;E9PQD7;E9PPT0	RPS2	40S ribosomal protein S2	27	19542000	8820300	9121500	11251000	9059700	13890000	1.096	0.787188
Q00765;B7Z332;B7Z510;H0Y8J8;E2QRG8;Q00765-2	REEP5	Receptor expression-enhancing protein 5	8	30815000	29380000	41648000	0	39714000	48910000	1.14916	0.790291
Q15149-7;Q15149-8;Q15149-9;Q15149-5;Q15149-4;Q15149-6;Q15149-2;Q15149;Q15149-3;H0YDN1;E9PMV1	PLEC	Plectin	797	103320000	174310000	139890000	82485000	133570000	246170000	0.903283	0.79068
A0A0C4DFM1;Q92544	TM9SF4	Transmembrane 9 superfamily member 4	6	0	8972000	4595300	19440000	0	0	0.697906	0.792994
P60866;P60866-2;E5RIP1;E5RJX2;G3XAN0	RPS20	40S ribosomal protein S20	7	5957100	0	8048200	0	7090100	10132000	0.813217	0.794428
O14828-2;O14828	SCAMP3	Secretory carrier-associated membrane protein 3	8	23163000	25917000	15003000	0	19154000	59806000	0.811588	0.795856
O75947;F5H608;O75947-2	ATP5H	ATP synthase subunit d, mitochondrial	7	6720700	7691700	10094000	2549000	17399000	0	1.22851	0.796633
P06576;H0YH81;F8W079;F8W0P7;H0YI37	ATP5B	ATP synthase subunit beta, mitochondrial;ATP synthase subunit beta	26	87165000	155920000	93335000	46851000	163460000	161080000	0.905838	0.805467
Q9Y6N5;H3BMS6;H3BNX3;A0A1B0GXB4;H3BV36;H3BNP9	SQRDL	Sulfide:quinone oxidoreductase, mitochondrial	23	17395000	21278000	20270000	0	36008000	31852000	0.868597	0.807711
O75390;B4DJV2;A0A0C4DGI3;H0YIC4;F8VPF9;H0YH82;F8W1S4;F8VPA1;F8VRI6;F8VZK9;F8VR34;F8VTT8;F8VWQ5;F8W4S1;F8VX68;F8VRP1;F8VX07;F8W642	CS	Citrate synthase, mitochondrial;Citrate synthase	40	11093000	31025000	18832000	0	27856000	24888000	1.15558	0.808527
Q96BM9;A0A087X2J2;Q9NVJ2-2	ARL8A	ADP-ribosylation factor-like protein 8A	3	190150000	120070000	136610000	89145000	191080000	138660000	1.06671	0.809837
A0A3B3ITT5;P47914	RPL29	60S ribosomal protein L29	4	25649000	0	18078000	0	14384000	21763000	1.2097	0.811803
E7EX29;P63104;E7ESK7;E5RGE1;E5RIR4;E9PD24;E7EVZ2;B0AZS6;P63104-2;B7Z2E6;H0YB80;F8WEB6;A2IDB1	YWHAZ	14-3-3 protein zeta/delta	25	16819000	7459200	6573600	0	16889000	9502900	1.16899	0.813025
P13473-2;P13473;P13473-3;H0YCG2	LAMP2	Lysosome-associated membrane glycoprotein 2	7	80552000	41489000	0	4113400	44341000	100760000	0.81789	0.815846
H0YFW7;Q9NS93;F5H587;F5GXE1;F5H7C5;F5GWC3;H0YFT0;H0YFM3	TM7SF3	Transmembrane 7 superfamily member 3	10	27292000	4347900	0	8773100	14150000	14788000	0.839008	0.827061
P35475;P35475-2;D6R9D5	IDUA	Alpha-L-iduronidase	15	38139000	22090000	20710000	19022000	25393000	31912000	1.06042	0.83023
Q15393;Q15393-2;J3QL37;Q15393-3	SF3B3	Splicing factor 3B subunit 3	8	0	0	2913100	0	4035800	0	0.721815	0.832598
Q8IY95;Q8IY95-2;D6RAZ6	TMEM192	Transmembrane protein 192	11	18961000	33666000	19600000	0	26564000	37560000	1.12636	0.834802
H3BNE1;H3BR18;H3BM38;H3BPJ0;O00161-2;O00161;H3BNG6;H3BU94;H3BR99;H3BV99;H3BP15;H3BQY9	SNAP23	Synaptosomal-associated protein;Synaptosomal-associated protein 23	41	0	15372000	12814000	0	18272000	14787000	0.852597	0.835859
E7EUT5;P04406-2;P04406;O14556	GAPDH	Glyceraldehyde-3-phosphate dehydrogenase	22	34288000	132480000	71815000	0	107200000	169170000	0.863274	0.836205
P21281;H0YC04;C9JNS9;C9JL73;P15313	ATP6V1B2	V-type proton ATPase subunit B, brain isoform	10	23707000	0	0	0	9450900	8684000	1.30726	0.837039
Q13228;Q13228-4;A6PVX1;Q13228-2;Q13228-3;F2Z2W8;F8WCR4;H0Y532;C9JVL0	SELENBP1	Selenium-binding protein 1	28	3042800	11972000	4066800	0	7012100	9480200	1.157	0.83983
H7C3P4;F6S8M0;P15586-2;P15586;H0YFA9;F5H4C6	GNS	N-acetylglucosamine-6-sulfatase	26	88024000	69166000	61840000	60285000	69077000	83062000	1.0311	0.84022
P00338-3;P00338;P00338-5;P00338-2;P00338-4;F5GXY2;F5GYU2;F5GXH2;Q6ZMR3;F5H245;P07195;P07864;A0A5F9ZHM4;G3XAP5;A0A087WUM2;A8MW50;F5H155;F5H5G7;A0A3B3IS95	LDHA	L-lactate dehydrogenase A chain	41	40806000	22114000	23848000	35166000	30635000	25207000	0.953411	0.841412
P31689-2;P31689	DNAJA1	DnaJ homolog subfamily A member 1	10	3837700	21952000	5498000	0	18981000	7243500	1.19307	0.843234
A0A087X2D0;P84103-2;P84103	SRSF3	Serine/arginine-rich splicing factor 3	6	0	0	3869100	0	2871100	0	1.3476	0.846018
P05387;H0YDD8	RPLP2	60S acidic ribosomal protein P2	4	0	25079000	14555000	0	17273000	29077000	0.855102	0.850567
P07099;B1AQP8;B1AQP9	EPHX1	Epoxide hydrolase 1	12	21999000	12817000	15736000	15223000	21822000	11127000	1.04941	0.856969
O75382-2;O75382;A0A1W2PPI7;O75382-4;O75382-3;E9PMK8;E9PMW5	TRIM3	Tripartite motif-containing protein 3	35	34910000	29261000	19337000	27162000	17196000	44258000	0.942358	0.860973
M0R3D6;M0R1A7;M0R117;Q02543;M0R0P7	RPL18A	60S ribosomal protein L18a	19	0	6035500	10824000	0	8307000	6360700	1.14943	0.864366
H3BS10;H3BP20;P06865;H3BU85;H3BTD4;P06865-2;A0A087WUJ7	HEXA	Beta-hexosaminidase;Beta-hexosaminidase subunit alpha	44	49670000	76695000	85392000	22795000	101410000	73765000	1.06964	0.865286
P38646;D6RJI2;A0A3B3ITI4;D6RA73;H0YBG6;A0A3B3ITN1;H0Y8S0	HSPA9	Stress-70 protein, mitochondrial	27	13523000	40842000	49745000	0	27949000	64608000	1.12482	0.867464
A0A2R8YFR4;A0A2R8YCW1;O00571-2;A0A0D9SFB3;A0A2R8Y645;A0A2R8Y5G6;O00571;A0A0D9SG12;F6S8Q4;A0A2R8Y4A4;A0A0D9SF53;A0A2R8YFS5;A0A2U3TZJ9;A0A2R8YF78;O15523-2;O15523;A0A2R8Y7T2;A0A2R8YDT5;A0A2R8YDH3;O15523-3;A0A087WVZ1;A0A0J9YVQ7;C9J081;A0A2R8YF89;Q9NQI0;A0A2R8YCU0;D6RCM4;A0A2R8Y650;Q9NQI0-4;Q9NQI0-2;Q9NQI0-3;C9J8G5;A0A087WX09;H0Y960;A0A2R8Y4D2	DDX3X;DDX3Y	ATP-dependent RNA helicase DDX3X;ATP-dependent RNA helicase DDX3Y	269	49893000	80719000	36234000	0	67035000	84423000	1.1016	0.867775
Q13488;E9PNA6;E9PM12;E9PMC5;Q13488-2;H0YCE3;H0YEL3	TCIRG1	V-type proton ATPase 116 kDa subunit a isoform 3;V-type proton ATPase subunit a	40	64610000	71520000	48370000	0	75241000	93775000	1.09161	0.869533
E9PL09;P23396;P23396-2;F2Z2S8;H0YF32;H0YCJ7;E9PPU1;H0YEU2;E9PQ96;E9PJH4;E9PK82;E9PSF4;H0YES8;E9PJN9;E9PQX2	RPS3	40S ribosomal protein S3	52	1316700	9953200	6599600	0	10242000	5622800	1.12636	0.871767
A0A0A0MRM8;Q9UM54-5;Q9UM54-6;Q9UM54-2;A0A1Y0BRN3;E7EW20;Q9UM54;Q9UM54-1;Q9UM54-4;A0A590UJ40;A0A590UK71;A0A0D9SGC1;A0A590UK22;A0A590UKB0;A0A590UJ75;A0A590UK86;A0A590UJY4;A0A5F9ZI03;A0A590UJW9	MYO6	Unconventional myosin-VI	107	5484500	4881500	3355000	0	7240600	7793100	0.912683	0.874012
F8W914;Q9NQC3-2;Q9NQC3-5;Q9NQC3;H7C106;Q9NQC3-3;Q9NQC3-4;Q9NQC3-6;A0A0U1RQR6	RTN4	Reticulon;Reticulon-4	30	15171000	10453000	1566700	0	8691400	22341000	0.876204	0.874821
P78527-2;P78527	PRKDC	DNA-dependent protein kinase catalytic subunit	22	2374800	37150000	8362800	15925000	13859000	12744000	1.12603	0.876345
P12268;H0Y4R1;E7ETK5	IMPDH2	Inosine-5-monophosphate dehydrogenase 2	7	15316000	8168000	5645000	0	14090000	12468000	1.09681	0.879615
Q14974;J3QR48;J3KTM9;Q14974-2	KPNB1	Importin subunit beta-1	7	10321000	0	6035300	0	6054100	8419800	1.13005	0.880126
P53990-2;P53990;P53990-4;P53990-5;H3BQF7;H3BMU1;H3BUI0;P53990-3;F5GXM3;J3KR23;H3BPP6;H3BRE2;P53990-6	IST1	IST1 homolog	35	12220000	0	0	0	9719500	0	1.25727	0.880529
P14625;Q96GW1;A0A1W2PRR1;H0YIV0;Q58FF3;F8W026	HSP90B1	Endoplasmin	24	37067000	30909000	77186000	54960000	55114000	42297000	0.952688	0.881407
Q7Z2K6;E7ER77;A0A0C4DGF0;Q7Z2K6-2	ERMP1	Endoplasmic reticulum metallopeptidase 1	11	0	3825300	4410300	0	6964800	0	1.18246	0.883031
P61225;F6U784;P10114	RAP2B	Ras-related protein Rap-2b	2	12379000	11361000	8671000	0	12797000	22739000	0.912061	0.883526
Q8NHP8;Q8NHP8-2	PLBD2	Putative phospholipase B-like 2;Putative phospholipase B-like 2 32 kDa form;Putative phospholipase B-like 2 45 kDa form	7	52090000	33534000	38487000	56379000	44155000	28064000	0.965108	0.887221
P25705;P25705-2;P25705-3;K7ENJ4;K7ERX7;K7EK77;K7EQH4;K7EJP1;K7ESA0	ATP5A1	ATP synthase subunit alpha, mitochondrial	57	89944000	111860000	85858000	0	151970000	159230000	0.924364	0.888502
P06733;K7EM90;A0A2R8Y6G6;A0A2R8Y6I8;A0A2R8Y879;A0A2R8YEM5;P06733-2;K7ERS8	ENO1	Alpha-enolase;Enolase	27	22876000	20744000	18040000	0	22657000	34467000	1.07941	0.889426
Q99714;Q5H928;Q99714-2	HSD17B10	3-hydroxyacyl-CoA dehydrogenase type-2	7	9748300	11204000	8010100	0	15485000	15758000	0.927004	0.892661
G3V2K7;P49755	TMED10	Transmembrane emp24 domain-containing protein 10	2	15005000	20020000	20160000	0	25733000	33873000	0.92583	0.893644
P30038;P30038-2;P30038-3;Q5TF55	ALDH4A1	Delta-1-pyrroline-5-carboxylate dehydrogenase, mitochondrial	40	25813000	36898000	58707000	20537000	49932000	57198000	0.951052	0.894859
B1AHC9;P12956-2;P12956	XRCC6	X-ray repair cross-complementing protein 6	12	2734100	7289600	7913300	0	13030000	3171400	1.10713	0.898278
P09382;F8WEI7	LGALS1	Galectin-1	5	2436300	14864000	7500200	0	13013000	14136000	0.913496	0.89909
Q92542-2;Q92542;Q5T205;H0Y6T7;H0Y3Z4;Q5T210;Q5T209	NCSTN	Nicastrin	21	41914000	35166000	25643000	0	41535000	69301000	0.926802	0.902281
Q53GQ0;A0A1B0GVY6;A0A1B0GV93	HSD17B12	Very-long-chain 3-oxoacyl-CoA reductase	4	6181900	4493100	8067500	0	11611000	5771100	1.07826	0.903365
Q07960;H0YE29;E9PNR6	ARHGAP1	Rho GTPase-activating protein 1	6	3514200	2642100	2368400	0	7540600	0	1.13051	0.903368
A0A087WUZ3;Q01082;Q01082-3;Q01082-2;F8W6C1	SPTBN1	Spectrin beta chain, non-erythrocytic 1	19	5311900	3886400	2757300	0	3413100	9669700	0.913841	0.904028
Q15904;A0A0C4DGX8;A6QRJ1	ATP6AP1	V-type proton ATPase subunit S1	6	0	0	12865000	0	4131200	10744000	0.864862	0.905644
Q9HBH5	RDH14	Retinol dehydrogenase 14	4	5867100	7830500	3339100	0	10411000	7893400	0.930743	0.906946
C9J6P4;Q7Z2W4-2;Q7Z2W4;Q7Z2W4-3;H7C5K1;Q7Z2W4-5;Q7Z2W4-4	ZC3HAV1	Zinc finger CCCH-type antiviral protein 1	18	1197800	1476100	1133400	0	2366800	1705300	0.934972	0.907427
P55084-2;P55084;B5MD38;C9JEY0;C9JE81;F5GZQ3;C9K0M0	HADHB	Trifunctional enzyme subunit beta, mitochondrial;3-ketoacyl-CoA thiolase	34	4577600	10015000	8669900	0	8785500	16328000	0.926295	0.90762
P20340-2;P20340;F5GX61;P20340-3;P20340-4;Q9NRW1;F5H3K7;J3KR73;Q9NRW1-2;C9JB90;C9JU14;C9J0I2;Q53S08;Q14964	RAB6A;RAB6B	Ras-related protein Rab-6A;Ras-related protein Rab-6B	46	42637000	56133000	56350000	0	111180000	55442000	0.930969	0.911545
P29692;E9PK01;P29692-2;E9PL12;P29692-3;E9PRY8;A0A087X1X7;E9PI39;E9PQ49;E9PPR1;P29692-4;E9PQZ1;E9PMW7;E9PL71;H0YCK7;E9PK06;E9PIZ1;E9PN91;E9PQC9;H0YE72;H0YE58;E9PJD0;E9PK72;E9PKK3;E9PNW6	EEF1D	Elongation factor 1-delta	69	9614400	10655000	8134700	0	12332000	17936000	0.93842	0.913112
P32119;A6NIW5;P32119-2	PRDX2	Peroxiredoxin-2	6	16697000	15320000	14530000	0	23469000	25895000	0.942934	0.915186
P61019;P61019-2;H7C125;H0YD31;E9PKL7;A0A3B3ITL1;Q8WUD1;E9PE37;A0A1D5RMT4;H0YDL5;Q8WUD1-2	RAB2A;RAB2B	Ras-related protein Rab-2A;Ras-related protein Rab-2B	30	12255000	22873000	24570000	0	33126000	30409000	0.939608	0.915305
P49458;Q6P2S0;Q659G3;E9PE20;P49458-2	SRP9;DKFZp564M2223	Signal recognition particle 9 kDa protein	16	130660000	83194000	46072000	0	0	232590000	1.11753	0.916163
Q9NZM1-5;Q9NZM1-2;Q9NZM1-6;Q9NZM1-3;Q9NZM1;H0YD14;Q9NZM1-8;Q9NZM1-7	MYOF	Myoferlin	13	0	0	1857700	0	2169500	0	0.85628	0.918328
C9J3E2;B5MC07;O95994;H7C3Z9	AGR2	Anterior gradient protein 2 homolog	7	0	15263000	20912000	0	19497000	19585000	0.925618	0.919661
Q15459;Q15459-2	SF3A1	Splicing factor 3A subunit 1	8	0	2587700	4418700	0	3685800	3898800	0.923767	0.919944
Q9H2U2-6;Q9H2U2-3;Q9H2U2;Q9H2U2-2;D6R967;H0Y9D8;Q9H2U2-4	PPA2	Inorganic pyrophosphatase 2, mitochondrial	11	6348900	0	4924900	0	8032300	2295400	1.09161	0.923044
Q06830;A0A0A0MSI0;A0A0A0MRQ5	PRDX1	Peroxiredoxin-1	14	57002000	37269000	30623000	0	56822000	74882000	0.948293	0.928933
O00754;O00754-2;M0QZ24;M0QYZ1;M0QZG6;M0R2P5	MAN2B1	Lysosomal alpha-mannosidase;Lysosomal alpha-mannosidase A peptide;Lysosomal alpha-mannosidase B peptide;Lysosomal alpha-mannosidase C peptide;Lysosomal alpha-mannosidase D peptide;Lysosomal alpha-mannosidase E peptide	25	63518000	114460000	75058000	72256000	88646000	96814000	0.98184	0.93141
Q8IV08;M0R2W7;M0R1F7	PLD3	Phospholipase D3	6	40669000	0	21637000	0	27519000	39216000	0.933633	0.933113
Q71UI9;P0C0S5;C9J0D1;A0A494C189;Q71UI9-3;Q71UI9-4;Q71UI9-2;C9J386;Q71UI9-5	H2AFV;H2AFZ	Histone H2A.V;Histone H2A.Z;Histone H2A	12	0	61510000	3340000	0	50183000	8007900	1.11444	0.934355
P27797;K7EJB9;K7EL50	CALR	Calreticulin	11	11073000	42930000	65627000	23465000	59639000	31519000	1.04368	0.935077
Q9H9B4;D6RFI0;D6RDG7;S4R2X2;D6RAE9	SFXN1	Sideroflexin-1	12	0	6924000	2847100	0	1269700	7722100	1.08667	0.937704
F6S8N6;A0A3F2YNX8;A0A0A0MRJ6;P22061;P22061-2;H7C4X2;F8WDT3;F8WAV5;F8WAX2;C9J0F2	PCMT1	Protein-L-isoaspartate O-methyltransferase;Protein-L-isoaspartate(D-aspartate) O-methyltransferase	25	30352000	16370000	22109000	25843000	20716000	21194000	1.01591	0.938484
J3QR09;J3KTE4;P84098	RPL19	Ribosomal protein L19;60S ribosomal protein L19	6	0	10555000	11014000	0	10691000	9671600	1.05925	0.939206
Q9Y287-2;Q9Y287;U3KQL7;A0A3B3IU60;A0A3B3ITP9;A0A3B3IUC0	ITM2B	Integral membrane protein 2B;BRI2, membrane form;BRI2 intracellular domain;BRI2C, soluble form;Bri23 peptide	8	7448600	0	7663500	0	0	16541000	0.913615	0.941147
Q9UBI6	GNG12	Guanine nucleotide-binding protein G(I)/G(S)/G(O) subunit gamma-12	2	13029000	0	0	0	5999900	8097600	0.924206	0.946362
F5GY37;J3KPX7;Q99623;F5GWA7;Q99623-2;F5H3X6;F5H2D2;U3KPZ5;F5H0C5	PHB2	Prohibitin-2	51	32346000	49575000	34205000	0	59918000	60515000	0.964237	0.94829
Q96M27;Q96M27-3;Q96M27-2;Q96M27-4;Q96M27-5	PRRC1	Protein PRRC1	8	0	0	2665000	0	2417300	0	1.10247	0.948418
Q5TH69	ARFGEF3	Brefeldin A-inhibited guanine nucleotide-exchange protein 3	5	0	5847700	5693800	0	4774000	6219400	1.04986	0.9491
O95831-3;O95831;E9PMA0;O95831-5;O95831-2;O95831-6;O95831-4	AIFM1	Apoptosis-inducing factor 1, mitochondrial	24	11085000	9499400	8817900	12077000	10758000	6217200	1.01205	0.953912
Q96AG4	LRRC59	Leucine-rich repeat-containing protein 59	3	11671000	14998000	12996000	0	20267000	20606000	0.970445	0.956143
O60884;A0A087WT48	DNAJA2	DnaJ homolog subfamily A member 2	8	34478000	13957000	31619000	36771000	17305000	27467000	0.98174	0.956396
P54886-2;P54886	ALDH18A1	Delta-1-pyrroline-5-carboxylate synthase;Glutamate 5-kinase;Gamma-glutamyl phosphate reductase	8	0	2752500	3824100	0	3114500	3215800	1.03891	0.960368
K7EIY1;K7ENN5;Q9Y421-2;Q9Y421;K7ELZ8;Q9Y421-3	FAM32A	Protein FAM32A	27	14890000	10519000	16871000	23716000	19619000	0	0.975655	0.965107
O60664-4;O60664;K7EL96;O60664-3;K7ER39;K7ERZ3;O60664-2	PLIN3	Perilipin-3	25	5307200	15146000	7375100	0	14020000	14562000	0.97363	0.966541
Q9UBM7;E9PRL8;E9PQ71;E9PIP9;E9PJ54;H0YE57;E9PM00	DHCR7	7-dehydrocholesterol reductase	9	5077200	0	0	0	0	4790700	1.0598	0.969229
P60468;S4R3B5	SEC61B	Protein transport protein Sec61 subunit beta	4	0	0	7545700	0	7961200	0	0.947809	0.971599
Q5QNW6-2;Q5QNW6;U3KQK0;Q99880;O60814;Q93079;Q99877;P62807;P58876;P57053;Q99879;P23527;P33778;Q16778;P06899;Q8N257;Q96A08;A0A2R8Y619;Q6DRA6;Q6DN03	HIST2H2BF;HIST1H2BN;HIST1H2BL;HIST1H2BK;HIST1H2BH;HIST1H2BC;HIST1H2BD;H2BFS;HIST1H2BM;HIST1H2BO;HIST1H2BB;HIST2H2BE;HIST1H2BJ;HIST3H2BB;HIST1H2BA	Histone H2B type 2-F;Histone H2B;Histone H2B type 1-L;Histone H2B type 1-K;Histone H2B type 1-H;Histone H2B type 1-N;Histone H2B type 1-C/E/F/G/I;Histone H2B type 1-D;Histone H2B type F-S;Histone H2B type 1-M;Histone H2B type 1-O;Histone H2B type 1-B;Histone H2B type 2-E;Histone H2B type 1-J;Histone H2B type 3-B;Histone H2B type 1-A	115	87974000	508290000	243770000	850590000	13437000	9650300	0.961492	0.972468
A0A0D9SF54;A0A0D9SGF6;Q13813-3;Q13813;Q13813-2;A0A1B0GTB7;A0A0D9SFF6	SPTAN1	Spectrin alpha chain, non-erythrocytic 1	37	3330700	2682900	2692800	0	3197400	5688100	0.979844	0.973036
P50990-3;P50990-2;P50990;H7C2U0;H7C4C8	CCT8	T-complex protein 1 subunit theta	22	10057000	6906000	5262300	0	8240900	13556000	1.01965	0.974427
P54920;M0R0Y2;M0R2M1;M0R058;M0R027;M0R0I4;M0R213;A0A087WZQ7;Q9H115-3;Q9H115-2;Q9H115	NAPA	Alpha-soluble NSF attachment protein	25	6081600	8094500	9942200	0	13836000	10659000	0.984621	0.978255
I3L3P7;P62244;I3L246;H3BV27;H3BT37;I3L303;H3BVC7	RPS15A	40S ribosomal protein S15a	5	13873000	12656000	4714500	0	17080000	13777000	1.01253	0.983808
P02786;G3V0E5;H7C3V5	TFRC	Transferrin receptor protein 1;Transferrin receptor protein 1, serum form	26	60873000	32912000	36107000	24915000	38127000	65921000	1.0072	0.984487
P08473;C9JR96;C9J9X7;C9IYX7	MME	Neprilysin	14	38749000	18990000	17986000	17055000	13784000	45635000	0.990206	0.984611
P04792;F8WE04	HSPB1	Heat shock protein beta-1	4	13223000	0	0	0	0	12871000	1.02735	0.985694
P00167-2;P00167;P00167-3;J3KNC7	CYB5A	Cytochrome b5	12	0	13346000	8853300	0	13721000	8794500	0.985956	0.985911
P51149;C9IZZ0;C9J4V0;C9J592;C9J8S3;C9J7D1;C9J4S4	RAB7A	Ras-related protein Rab-7a	25	71530000	46098000	30631000	0	58479000	88258000	1.01037	0.986666
Q99519;E9PIF4	NEU1	Sialidase-1	9	35280000	15092000	20783000	16656000	22704000	32084000	0.995955	0.990368
P68371;P04350;Q13509;Q13509-2;A0A0B4J269;Q9BUF5;K7ESM5;M0R2D3;M0R042;M0QYM7;M0R2T4;M0R278;M0R0X0;M0QZL7;M0QY37;M0QY85;M0QX14	TUBB4B;TUBB4A	Tubulin beta-4B chain;Tubulin beta-4A chain	13	12274000	32098000	32750000	41978000	20241000	15076000	0.997762	0.995933
P16615-4;P16615-5;P16615-2;P16615;P16615-3;H7C5W9;Q93084-3;Q93084-6;Q93084;Q93084-7;Q93084-5;Q93084-2;Q93084-4;O14983-2;O14983;O14983-3;H3BVB2	ATP2A2	Sarcoplasmic/endoplasmic reticulum calcium ATPase 2	69	10274000	8251500	10927000	18233000	11167000	0	1.00179	0.997555
E7EQR4;P15311;A0A2R8Y7M3;A0A2R8Y5S7;P35241-4;P26038;P35241;P35241-5	EZR	Ezrin	14	0	11980000	0	6091800	5905900	0	0.998525	0.999009
F5GYV5;H7BZV4;A0A0C4DG62;F8WCT1;F5H7X4;Q66PJ3-7;Q66PJ3-4;Q66PJ3-3;Q66PJ3-2;Q66PJ3	ARL6IP4	ADP-ribosylation factor-like protein 6-interacting protein 4	10	0	0	0	0	0	0	#DIV/0!	#DIV/0!
J3QL83;J3KRI9;J3QLV2;F5H1T4;J3QLU9;P04626-6;P04626-5;P04626-4;P04626	ERBB2	Receptor protein-tyrosine kinase;Receptor tyrosine-protein kinase erbB-2	9	0	0	0	0	0	0	#DIV/0!	#DIV/0!
E9PL01;A0A087WUC6;E9PI68;Q15005	SPCS2	Signal peptidase complex subunit 2	4	0	0	0	0	0	0	#DIV/0!	#DIV/0!
A0A087WYS5;A0A087WWM0;O43617-2;O43617	TRAPPC3	Trafficking protein particle complex subunit 3	4	0	0	0	0	0	0	#DIV/0!	#DIV/0!
B4DE93;G3V0I5;P49821-2;P49821	NDUFV1	NADH dehydrogenase [ubiquinone] flavoprotein 1, mitochondrial	4	0	0	0	0	0	0	#DIV/0!	#DIV/0!
F5GXJ9;Q13740-3;Q13740-2;Q13740	ALCAM	CD166 antigen	4	0	0	0	0	0	0	#DIV/0!	#DIV/0!
Q5RI15;Q5RI15-2	COX20	Cytochrome c oxidase protein 20 homolog	2	0	0	0	0	0	0	#DIV/0!	#DIV/0!
K7EP26	PIN1		1	0	0	0	0	0	0	#DIV/0!	#DIV/0!
Q12874	SF3A3	Splicing factor 3A subunit 3	1	0	0	0	0	0	0	#DIV/0!	#DIV/0!
Q96MP5	ZSWIM3	Zinc finger SWIM domain-containing protein 3	1	0	0	0	0	0	0	#DIV/0!	#DIV/0!

## Sheet: Table S4
Supplementary Table 4. Top 20 proteins identified by LysoIP-MS
Gene names	Protein names	LFQ intensity Ctrl_1	LFQ intensity Ctrl_2	LFQ intensity Ctrl_3	LFQ intensity siTMEM9_1	LFQ intensity siTMEM9_2	LFQ intensity siTMEM9_3	Peptide counts (unique)	pvalue
ATP5C1	ATP synthase subunit gamma, mitochondrial	10692000	15044000	12340000	0	0	0	10	0.000560946
MAN1B1	Endoplasmic reticulum mannosyl-oligosaccharide 1,2-alpha-mannosidase	5990000	4905700	4235700	0	0	0	13	0.000591578
PLXNB2	Plexin-B2	2191300	3047100	2157800	0	0	0	4	0.00106399
KIF2A	Kinesin-like protein KIF2A	1548800	1011100	1457200	0	0	0	13	0.00128537
VPS13C	Vacuolar protein sorting-associated protein 13C	9553400	11025000	14569000	29428000	23621000	29334000	58	0.00292213
DNAJB2	DnaJ homolog subfamily B member 2	2876800	1933000	3667300	0	0	0	12	0.00487527
LAMTOR4	Ragulator complex protein LAMTOR4	67200000	41244000	37525000	0	0	0	7	0.00645865
SUCLG2	Succinyl-CoA ligase [GDP-forming] subunit beta, mitochondrial	4758500	3820400	3462100	0	1844800	0	8	0.00945185
NONO	Non-POU domain-containing octamer-binding protein	13794000	10276000	19463000	0	4888900	0	29	0.0147189
BCAR1	Breast cancer anti-estrogen resistance protein 1	54638000	57618000	48503000	100100000	80948000	75910000	203	0.0149866
RPL9	60S ribosomal protein L9	11741000	11396000	4417700	0	0	0	14	0.0183024
ITGB1	Integrin beta-1	8018500	4253000	3559700	0	0	0	20	0.0189488
GOLGA5	Golgin subfamily A member 5	3900700	1390600	3237100	0	0	0	9	0.0193416
RBMX	RNA-binding motif protein, X chromosome;RNA-binding motif protein, X chromosome, N-terminally processed	34488000	23539000	36142000	0	17423000	0	35	0.0219447
FASN	Fatty acid synthase;[Acyl-carrier-protein] S-acetyltransferase;[Acyl-carrier-protein] S-malonyltransferase;3-oxoacyl-[acyl-carrier-protein] synthase;3-oxoacyl-[acyl-carrier-protein] reductase;3-hydroxyacyl-[acyl-carrier-protein] dehydratase;Enoyl-[acyl-carrier-protein] reductase;Oleoyl-[acyl-carrier-protein] hydrolase	15121000	18174000	12708000	37230000	22783000	30617000	31	0.0290603
MEF2BNB	Protein MEF2BNB	1640100	5872100	6269700	0	0	0	7	0.0361816
TMED2	Transmembrane emp24 domain-containing protein 2	9253400	12590000	26344000	0	0	0	7	0.0372535
SNRNP70	U1 small nuclear ribonucleoprotein 70 kDa	4916900	3624400	6678600	0	3172200	0	14	0.04358
VPS26B	Vacuolar protein sorting-associated protein 26B	3784200	2735200	5753500	0	2289300	0	2	0.0464726
CHMP4B	Charged multivesicular body protein 4b	24694000	7248700	12122000	0	0	0	3	0.0475213

## Sheet: Table S5
Supplementary Table 5. BRCA cells RNAseq data
Gene_id	readcount_KO	readcount_WT	log2FoldChange	pval	padj	Associated Gene Name	genetype	Description	WT_B_readcount	WT_A_readcount	KO_B_readcount	KO_A_readcount	WT_B_fpkm	WT_A_fpkm	KO_B_fpkm	KO_A_fpkm
ENSG00000108342	3.91401	1320.6	-6.8355	4.1253e-127	1.4906e-124	CSF3	protein_coding	colony stimulating factor 3 (granulocyte) [Source:HGNC Symbol;Acc:2438]	1402	1208	4	4	67.3602	70.1347	0.208538	0.222964
ENSG00000169248	3.46462	871.372	-6.3289	9.2659e-100	1.9013e-97	CXCL11	protein_coding	chemokine (C-X-C motif) ligand 11 [Source:HGNC Symbol;Acc:10638]	960	768	2	5	43.6759	42.2224	0.0987347	0.263913
ENSG00000051523	2.45954	744.393	-6.2473	6.119e-90	1.0485e-87	CYBA	protein_coding	cytochrome b-245, alpha polypeptide [Source:HGNC Symbol;Acc:2577]	807	667	2	3	58.0303	57.9586	0.156056	0.250278
ENSG00000140563	16.608	1789.9	-6.2127	4.3059e-180	3.1116e-177	MCTP2	protein_coding	multiple C2 domains, transmembrane 2 [Source:HGNC Symbol;Acc:25636]	1933	1610	18	16	45.1508	45.4434	0.456221	0.433584
ENSG00000157227	41.0174	3517.64	-6.1712	0	0	MMP14	protein_coding	matrix metallopeptidase 14 (membrane-inserted) [Source:HGNC Symbol;Acc:7160]	3829	3139	45	39	163.204	161.677	2.08126	1.92854
ENSG00000169245	1.48104	567.867	-6.0172	2.7368e-75	3.6684e-73	CXCL10	protein_coding	chemokine (C-X-C motif) ligand 10 [Source:HGNC Symbol;Acc:10637]	583	536	1	2	26.8406	29.8194	0.0499566	0.106825
ENSG00000230937	0	444.668	-5.9461	9.4455e-65	9.7511e-63	MIR205HG	processed_transcript	MIR205 host gene (non-protein coding) [Source:HGNC Symbol;Acc:43562]	497	386	0	0	27.0562	25.3926	0	0
ENSG00000165474	0	442.167	-5.9386	1.568e-64	1.5795e-62	GJB2	protein_coding	gap junction protein, beta 2, 26kDa [Source:HGNC Symbol;Acc:4284]	494	384	0	0	11.7007	10.9908	0	0
ENSG00000079308	6.40012	737.072	-5.7564	2.9868e-92	5.338e-90	TNS1	protein_coding	tensin 1 [Source:HGNC Symbol;Acc:11973]	814	648	5	8	19.7479	18.9969	0.131624	0.225168
ENSG00000180730	1.957	460.868	-5.6399	3.3118e-65	3.4403e-63	SHISA2	protein_coding	shisa homolog 2 (Xenopus laevis) [Source:HGNC Symbol;Acc:20366]	544	376	2	2	10.272	8.57934	0.0409783	0.0438133
ENSG00000064300	7.32548	705.778	-5.5955	5.9868e-90	1.0365e-87	NGFR	protein_coding	nerve growth factor receptor [Source:HGNC Symbol;Acc:7809]	738	655	8	7	20.0576	21.5117	0.23593	0.22072
ENSG00000170412	26.9221	1596.42	-5.5385	1.0361e-177	6.6712e-175	GPRC5C	protein_coding	G protein-coupled receptor, family C, group 5, member C [Source:HGNC Symbol;Acc:13309]	1700	1456	27	28	61.4909	63.6405	1.05973	1.17501
ENSG00000137033	9.17619	737.264	-5.4742	4.9732e-93	9.2877e-91	IL33	protein_coding	interleukin 33 [Source:HGNC Symbol;Acc:16028]	788	670	14	5	30.8144	31.6602	0.594053	0.226839
ENSG00000130203	11.7952	805.149	-5.4033	9.6201e-101	2.024e-98	APOE	protein_coding	apolipoprotein E [Source:HGNC Symbol;Acc:613]	883	713	10	14	52.9246	51.6413	0.650378	0.97352
ENSG00000137975	19.9131	1068.59	-5.2723	4.6425e-124	1.6418e-121	CLCA2	protein_coding	chloride channel accessory 2 [Source:HGNC Symbol;Acc:2016]	1081	1022	26	15	33.1692	37.894	0.865668	0.533974
ENSG00000099282	3.88743	420.69	-5.246	1.6544e-61	1.5624e-59	TSPAN15	protein_coding	tetraspanin 15 [Source:HGNC Symbol;Acc:23298]	432	397	5	3	29.1255	32.3437	0.365787	0.234655
ENSG00000107159	17.2434	917.313	-5.225	5.3815e-112	1.3976e-109	CA9	protein_coding	carbonic anhydrase IX [Source:HGNC Symbol;Acc:1383]	1004	814	13	22	61.5431	60.2949	0.864685	1.56455
ENSG00000109667	11.6623	685.686	-5.1621	2.3821e-87	3.9993e-85	SLC2A9	protein_coding	solute carrier family 2 (facilitated glucose transporter), member 9 [Source:HGNC Symbol;Acc:13446]	691	658	15	9	33.7095	38.7892	0.794025	0.509374
ENSG00000165175	0.475964	258.499	-5.0958	1.1743e-44	6.6165e-43	MID1IP1	protein_coding	MID1 interacting protein 1 [Source:HGNC Symbol;Acc:20715]	299	216	1	0	7.65625	6.68359	0.0277852	0
ENSG00000174600	9.41535	567.301	-5.0909	1.0541e-75	1.4361e-73	CMKLR1	protein_coding	chemokine-like receptor 1 [Source:HGNC Symbol;Acc:2121]	619	505	5	14	11.3354	11.175	0.0993541	0.297437
ENSG00000186847	0	244.97	-5.0779	2.2868e-42	1.2182e-40	KRT14	protein_coding	keratin 14 [Source:HGNC Symbol;Acc:6416]	307	185	0	0	14.5176	10.5715	0	0
ENSG00000002726	1.00508	273.052	-5.0763	6.7968e-46	3.9638e-44	ABP1	protein_coding	amiloride binding protein 1 (amine oxidase (copper-containing)) [Source:HGNC Symbol;Acc:80]	274	263	0	2	7.2463	8.4049	0	0.0613643
ENSG00000132470	43.2135	1693.76	-5.0619	1.3336e-190	1.3854e-187	ITGB4	protein_coding	integrin, beta 4 [Source:HGNC Symbol;Acc:6158]	1825	1527	38	50	35.401	35.7933	0.799843	1.12523
ENSG00000260359	4.97223	400.497	-5.0434	1.6229e-58	1.4049e-56	RP11-4F5.2	lincRNA	-	416	374	2	8	7.15004	7.76779	0.0373005	0.159524
ENSG00000206075	17.0308	778.101	-4.9919	2.3453e-98	4.5327e-96	SERPINB5	protein_coding	serpin peptidase inhibitor, clade B (ovalbumin), member 5 [Source:HGNC Symbol;Acc:8949]	863	681	21	14	46.0523	43.9136	1.21599	0.86674
ENSG00000100234	282.205	8948.14	-4.9394	0	0	TIMP3	protein_coding	TIMP metallopeptidase inhibitor 3 [Source:HGNC Symbol;Acc:11822]	9835	7906	292	285	115.386	112.085	3.71734	3.87923
ENSG00000189337	3.49119	308.609	-4.861	2.1704e-48	1.4203e-46	KAZN	protein_coding	kazrin, periplakin interacting protein [Source:HGNC Symbol;Acc:29173]	346	267	1	6	5.62468	5.24498	0.0176397	0.11316
ENSG00000150165	1.957	252.95	-4.8092	8.6572e-43	4.6416e-41	ANXA8L1	protein_coding	annexin A8-like 1 [Source:HGNC Symbol;Acc:23334]	263	236	2	2	9.02918	9.79074	0.0745061	0.0796605
ENSG00000136167	102.504	3071.59	-4.7945	0	0	LCP1	protein_coding	lymphocyte cytosolic protein 1 (L-plastin) [Source:HGNC Symbol;Acc:6528]	3299	2778	114	96	110.588	112.53	4.14667	3.73351
ENSG00000168542	514.683	15913	-4.7863	3.9857e-217	4.4164e-214	COL3A1	protein_coding	collagen, type III, alpha 1 [Source:HGNC Symbol;Acc:2201]	17366	14163	602	454	423.015	416.89	15.9119	12.8301
ENSG00000078900	1.50761	236.642	-4.7856	9.7535e-41	4.9275e-39	TP73	protein_coding	tumor protein p73 [Source:HGNC Symbol;Acc:12003]	271	200	0	3	5.73694	5.11625	0	0.0736805
ENSG00000198719	4.38997	316.765	-4.7813	2.2836e-49	1.5492e-47	DLL1	protein_coding	delta-like 1 (Drosophila) [Source:HGNC Symbol;Acc:2908]	336	290	5	4	5.71681	5.96243	0.092311	0.0789577
ENSG00000162511	12.1383	524.585	-4.7164	3.7892e-67	4.1709e-65	LAPTM5	protein_coding	lysosomal protein transmembrane 5 [Source:HGNC Symbol;Acc:29612]	636	414	16	9	24.9066	19.5915	0.679902	0.408902
ENSG00000057149	0	171.533	-4.6224	1.3712e-33	5.2152e-32	SERPINB3	protein_coding	serpin peptidase inhibitor, clade B (ovalbumin), member 3 [Source:HGNC Symbol;Acc:10569]	188	152	0	0	6.11974	5.97901	0	0
ENSG00000078596	1.98358	216.915	-4.5838	1.0452e-37	4.7208e-36	ITM2A	protein_coding	integral membrane protein 2A [Source:HGNC Symbol;Acc:6173]	244	187	1	3	15.1458	14.0267	0.0673552	0.216045
ENSG00000206073	3.94058	264.43	-4.58	1.2377e-42	6.6149e-41	SERPINB4	protein_coding	serpin peptidase inhibitor, clade B (ovalbumin), member 4 [Source:HGNC Symbol;Acc:10570]	295	230	3	5	13.9868	13.1776	0.154343	0.275035
ENSG00000181444	3.86086	261.845	-4.5546	9.1206e-42	4.7821e-40	ZNF467	protein_coding	zinc finger protein 467 [Source:HGNC Symbol;Acc:23154]	263	252	6	2	8.19556	9.4893	0.202882	0.0723058
ENSG00000170454	65.0305	1653.01	-4.5056	9.1217e-188	7.9795e-185	KRT75	protein_coding	keratin 75 [Source:HGNC Symbol;Acc:24431]	1779	1492	68	65	41.3391	41.8953	1.7146	1.75234
ENSG00000115159	6.90266	305.74	-4.4376	5.1817e-46	3.0649e-44	GPD2	protein_coding	glycerol-3-phosphate dehydrogenase 2 (mitochondrial) [Source:HGNC Symbol;Acc:4456]	335	271	5	9	11.0785	10.8297	0.179421	0.345301
ENSG00000047457	5.87101	280.368	-4.4184	3.5642e-43	1.936e-41	CP	protein_coding	ceruloplasmin (ferroxidase) [Source:HGNC Symbol;Acc:2295]	285	267	6	6	9.6314	10.9035	0.220021	0.235243
ENSG00000162458	38.2147	966.764	-4.3981	2.4424e-114	6.7657e-112	FBLIM1	protein_coding	filamin binding LIM protein 1 [Source:HGNC Symbol;Acc:24686]	1088	833	37	41	48.8005	45.1493	1.8008	2.13353
ENSG00000135114	54.3999	1305.12	-4.3945	3.5244e-150	1.7229e-147	OASL	protein_coding	2'-5'-oligoadenylate synthetase-like [Source:HGNC Symbol;Acc:8090]	1413	1171	52	59	52.9174	52.9937	2.11314	2.56347
ENSG00000170961	5.31533	265.447	-4.3915	3.6662e-41	1.8924e-39	HAS2	protein_coding	hyaluronan synthase 2 [Source:HGNC Symbol;Acc:4819]	302	226	8	3	3.89237	3.51987	0.111884	0.0448589
ENSG00000149527	4.44312	244.624	-4.3471	2.0592e-37	9.176e-36	PLCH2	protein_coding	phospholipase C, eta 2 [Source:HGNC Symbol;Acc:29037]	221	256	3	6	2.61612	3.66199	0.0385351	0.0824019
ENSG00000133169	0	142.826	-4.3385	1.1104e-28	3.3927e-27	BEX1	protein_coding	brain expressed, X-linked 1 [Source:HGNC Symbol;Acc:1036]	138	142	0	0	8.62555	10.7252	0	0
ENSG00000127507	4.38997	228.315	-4.2945	7.4281e-37	3.2749e-35	EMR2	protein_coding	egf-like module containing, mucin-like, hormone receptor-like 2 [Source:HGNC Symbol;Acc:3337]	229	220	5	4	3.86221	4.48367	0.0915038	0.0782673
ENSG00000020633	0	135.968	-4.2868	6.5873e-28	1.931e-26	RUNX3	protein_coding	runt-related transcription factor 3 [Source:HGNC Symbol;Acc:10473]	146	123	0	0	3.61674	3.68198	0	0
ENSG00000166086	19.0144	492.926	-4.2171	1.4923e-64	1.5124e-62	JAM3	protein_coding	junctional adhesion molecule 3 [Source:HGNC Symbol;Acc:15532]	540	437	22	17	17.2046	16.8246	0.760578	0.628378
ENSG00000116857	62.7546	1315.66	-4.203	1.3648e-137	5.8164e-135	TMEM9	protein_coding	transmembrane protein 9 [Source:HGNC Symbol;Acc:18823]	1497	1120	78	51	61.9963	56.0496	3.50516	2.45038
ENSG00000106565	1.42789	157.455	-4.2	3.6492e-29	1.1401e-27	TMEM176B	protein_coding	transmembrane protein 176B [Source:HGNC Symbol;Acc:29596]	172	140	3	0	7.59492	7.47023	0.143743	0
ENSG00000074181	113.953	2236.32	-4.1852	1.6685e-222	2.311e-219	NOTCH3	protein_coding	notch 3 [Source:HGNC Symbol;Acc:7883]	2447	1985	137	97	55.2221	54.1315	3.35481	2.53963
ENSG00000111341	86.4247	1716.56	-4.1815	1.1718e-185	9.7383e-183	MGP	protein_coding	matrix Gla protein [Source:HGNC Symbol;Acc:7060]	1807	1583	95	82	101.65	107.607	5.79886	5.35161
ENSG00000163220	45.8833	961.312	-4.1638	6.9835e-113	1.8721e-110	S100A9	protein_coding	S100 calcium binding protein A9 [Source:HGNC Symbol;Acc:10499]	1039	864	51	43	97.2436	97.717	5.17946	4.66911
ENSG00000163235	55.0353	1129.31	-4.1617	2.5546e-122	8.6653e-120	TGFA	protein_coding	transforming growth factor, alpha [Source:HGNC Symbol;Acc:11765]	1271	973	47	65	60.8496	56.2906	2.44163	3.61032
ENSG00000125726	11.2395	324.821	-4.1279	3.5711e-46	2.1428e-44	CD70	protein_coding	CD70 molecule [Source:HGNC Symbol;Acc:11937]	351	292	12	11	24.0243	24.1512	0.89124	0.873488
ENSG00000130762	18.0093	443.837	-4.1172	3.6485e-58	3.1421e-56	ARHGEF16	protein_coding	Rho guanine nucleotide exchange factor (GEF) 16 [Source:HGNC Symbol;Acc:15515]	488	392	22	15	14.8975	14.4607	0.728761	0.531257
ENSG00000124102	11.6092	326.303	-4.0799	1.0727e-44	6.0643e-43	PI3	protein_coding	peptidase inhibitor 3, skin-derived [Source:HGNC Symbol;Acc:8947]	353	293	17	7	33.0385	33.1378	1.72649	0.760088
ENSG00000165272	14.2016	359.454	-4.0491	2.0828e-48	1.3737e-46	AQP3	protein_coding	aquaporin 3 (Gill blood group) [Source:HGNC Symbol;Acc:636]	415	301	14	15	13.7916	12.0877	0.504853	0.578335
ENSG00000223414	0.475964	126.514	-4.0396	7.2881e-25	1.8987e-23	LINC00473	processed_transcript	long intergenic non-protein coding RNA 473 [Source:HGNC Symbol;Acc:21160]	158	96	1	0	5.70357	4.18767	0.0391705	0
ENSG00000142765	3.88743	181.725	-4.0278	2.3905e-30	7.8522e-29	SYTL1	protein_coding	synaptotagmin-like 1 [Source:HGNC Symbol;Acc:15584]	186	172	5	3	5.88783	6.57933	0.171744	0.110175
ENSG00000187955	47.0478	890.644	-4.0235	4.7583e-103	1.0545e-100	COL14A1	protein_coding	collagen, type XIV, alpha 1 [Source:HGNC Symbol;Acc:2191]	956	806	45	51	13.9609	14.2233	0.713076	0.864062
ENSG00000135373	57.333	1067.47	-4.0129	1.7323e-111	4.4297e-109	EHF	protein_coding	ets homologous factor [Source:HGNC Symbol;Acc:3246]	1117	990	74	44	52.9604	56.721	3.80714	2.42031
ENSG00000143546	26.3133	536.642	-3.9799	2.0383e-66	2.2143e-64	S100A8	protein_coding	S100 calcium binding protein A8 [Source:HGNC Symbol;Acc:10498]	590	474	31	23	55.1246	53.5159	3.14286	2.49311
ENSG00000117266	34.697	654.358	-3.9468	6.711e-78	9.4529e-76	CDK18	protein_coding	cyclin-dependent kinase 18 [Source:HGNC Symbol;Acc:8751]	735	565	37	34	29.2502	27.1707	1.59776	1.56979
ENSG00000163362	20.6283	433.106	-3.9286	1.2749e-53	1.0091e-51	C1orf106	protein_coding	chromosome 1 open reading frame 106 [Source:HGNC Symbol;Acc:25599]	430	421	18	24	16.0038	18.9342	0.726935	1.0363
ENSG00000088756	7.37863	223.4	-3.9256	8.3843e-34	3.2036e-32	ARHGAP28	protein_coding	Rho GTPase activating protein 28 [Source:HGNC Symbol;Acc:25509]	246	197	6	9	6.81974	6.59948	0.18049	0.289464
ENSG00000116962	7.90774	233.224	-3.9192	4.5757e-34	1.7728e-32	NID1	protein_coding	nidogen 1 [Source:HGNC Symbol;Acc:7821]	236	223	5	11	2.26052	2.58114	0.0519679	0.122239
ENSG00000132530	1.48104	128.374	-3.9011	2.3059e-24	5.7808e-23	XAF1	protein_coding	XIAP associated factor 1 [Source:HGNC Symbol;Acc:30932]	132	121	1	2	6.41625	7.10728	0.0527444	0.112787
ENSG00000122378	22.479	449.482	-3.899	2.0363e-56	1.6838e-54	FAM213A	protein_coding	family with sequence similarity 213, member A [Source:HGNC Symbol;Acc:28651]	511	383	24	22	17.3777	15.7391	0.885628	0.867988
ENSG00000104267	9.33563	252.846	-3.8967	1.618e-35	6.7911e-34	CA2	protein_coding	carbonic anhydrase II [Source:HGNC Symbol;Acc:1373]	306	200	8	11	18.1395	14.3266	0.514591	0.756512
ENSG00000133106	0	103.643	-3.8895	3.4884e-22	7.9208e-21	EPSTI1	protein_coding	epithelial stromal interaction 1 (breast) [Source:HGNC Symbol;Acc:16465]	111	94	0	0	3.87484	3.96524	0	0
ENSG00000062038	6.82294	209.047	-3.8838	3.8686e-32	1.3888e-30	CDH3	protein_coding	cadherin 3, type 1, P-cadherin (placental) [Source:HGNC Symbol;Acc:1762]	221	192	8	6	7.81582	8.2053	0.307002	0.246181
ENSG00000135925	23.9866	458.844	-3.8621	1.3093e-57	1.1047e-55	WNT10A	protein_coding	wingless-type MMTV integration site family, member 10A [Source:HGNC Symbol;Acc:13829]	494	414	24	25	25.3349	25.6569	1.33559	1.48749
ENSG00000127152	2.43297	135.413	-3.8147	2.1152e-24	5.3187e-23	BCL11B	protein_coding	B-cell CLL/lymphoma 11B (zinc finger protein) [Source:HGNC Symbol;Acc:13222]	140	127	3	2	1.27711	1.39996	0.0296955	0.0211665
ENSG00000267013	0.978502	111.98	-3.7962	3.4188e-22	7.784e-21	CTD-2171N6.1	lincRNA	-	117	104	1	1	3.46784	3.72492	0.0321619	0.0343869
ENSG00000099998	11.5826	268.044	-3.7749	1.6235e-35	6.7972e-34	GGT5	protein_coding	gamma-glutamyltransferase 5 [Source:HGNC Symbol;Acc:4260]	292	239	18	6	8.67859	8.58371	0.580508	0.206889
ENSG00000148680	21.0245	391.138	-3.7736	8.8174e-50	6.1064e-48	HTR7	protein_coding	5-hydroxytryptamine (serotonin) receptor 7, adenylate cyclase-coupled [Source:HGNC Symbol;Acc:5302]	421	353	22	21	7.25677	7.3527	0.411484	0.419953
ENSG00000143847	3.83429	152.641	-3.745	5.6403e-25	1.4717e-23	PPFIA4	protein_coding	protein tyrosine phosphatase, receptor type, f polypeptide (PTPRF), interacting protein (liprin), alpha 4 [Source:HGNC Symbol;Acc:9248]	158	143	7	1	2.91114	3.18385	0.13995	0.021376
ENSG00000129521	95.3617	1354.29	-3.6939	8.9282e-128	3.2977e-125	EGLN3	protein_coding	egl nine homolog 3 (C. elegans) [Source:HGNC Symbol;Acc:14661]	1494	1192	118	78	76.9124	74.1537	6.59169	4.65866
ENSG00000182022	22.9549	395.482	-3.6839	3.8423e-48	2.4563e-46	CHST15	protein_coding	carbohydrate (N-acetylgalactosamine 4-sulfate 6-O) sulfotransferase 15 [Source:HGNC Symbol;Acc:18137]	458	330	25	22	9.50926	8.27953	0.563236	0.529937
ENSG00000186807	2.48612	123.187	-3.6597	5.0499e-22	1.1312e-20	ANXA8L2	protein_coding	annexin A8-like 2 [Source:HGNC Symbol;Acc:23335]	128	115	1	4	4.48569	4.86998	0.0380266	0.162629
ENSG00000134569	14.1218	272.956	-3.6491	2.336e-36	1.0138e-34	LRP4	protein_coding	low density lipoprotein receptor-related protein 4 [Source:HGNC Symbol;Acc:6696]	287	252	17	12	6.08998	6.46167	0.391428	0.295417
ENSG00000143502	9.22933	207.47	-3.6276	1.0052e-29	3.1944e-28	SUSD4	protein_coding	sushi domain containing 4 [Source:HGNC Symbol;Acc:25470]	226	185	12	7	8.94778	8.85095	0.515534	0.321533
ENSG00000145703	83.9917	1138.67	-3.6237	9.9956e-116	2.9147e-113	IQGAP2	protein_coding	IQ motif containing GTPase activating protein 2 [Source:HGNC Symbol;Acc:6111]	1284	979	92	80	37.8289	34.854	2.94114	2.73444
ENSG00000106976	28.2968	440.78	-3.6105	1.6605e-52	1.2545e-50	DNM1	protein_coding	dynamin 1 [Source:HGNC Symbol;Acc:2972]	485	389	32	26	12.3023	11.9236	0.880775	0.765137
ENSG00000137573	8.27741	189.595	-3.5894	7.5539e-28	2.1988e-26	SULF1	protein_coding	sulfatase 1 [Source:HGNC Symbol;Acc:20391]	203	172	10	7	6.64809	6.80675	0.355361	0.265962
ENSG00000149573	24.5423	389.28	-3.5893	1.9022e-46	1.1539e-44	MPZL2	protein_coding	myelin protein zero-like 2 [Source:HGNC Symbol;Acc:3496]	441	333	22	28	20.3378	18.5575	1.10092	1.49811
ENSG00000126016	11.1863	220.07	-3.5462	3.5448e-30	1.1553e-28	AMOT	protein_coding	angiomotin [Source:HGNC Symbol;Acc:17810]	228	206	14	9	3.23255	3.5293	0.215381	0.148038
ENSG00000183098	1.45447	101.509	-3.5431	2.366e-19	4.5621e-18	GPC6	protein_coding	glypican 6 [Source:HGNC Symbol;Acc:4454]	122	81	2	1	1.01878	0.817362	0.0181225	0.0096881
ENSG00000205420	0.951928	98.1718	-3.5403	9.6084e-19	1.8005e-17	KRT6A	protein_coding	keratin 6A [Source:HGNC Symbol;Acc:6443]	128	70	2	0	7.57113	5.00333	0.128366	0
ENSG00000158769	1.50761	102.535	-3.5353	3.0952e-19	5.9338e-18	F11R	protein_coding	F11 receptor [Source:HGNC Symbol;Acc:14685]	99	102	0	3	3.58574	4.46432	0	0.126062
ENSG00000152207	0	81.7857	-3.535	6.66e-18	1.1916e-16	CYSLTR2	protein_coding	cysteinyl leukotriene receptor 2 [Source:HGNC Symbol;Acc:18274]	83	78	0	0	1.75914	1.99769	0	0
ENSG00000139044	1.00508	96.2373	-3.5322	1.0054e-18	1.8797e-17	B4GALNT3	protein_coding	beta-1,4-N-acetyl-galactosaminyl transferase 3 [Source:HGNC Symbol;Acc:24137]	89	99	0	2	2.15144	2.89191	0	0.0560904
ENSG00000124107	9.20276	191.908	-3.5022	7.2946e-27	2.0309e-25	SLPI	protein_coding	secretory leukocyte peptidase inhibitor [Source:HGNC Symbol;Acc:11092]	214	167	13	6	19.3905	18.2853	1.27817	0.630734
ENSG00000135363	2.01015	104.199	-3.4756	5.8373e-19	1.1038e-17	LMO2	protein_coding	LIM domain only 2 (rhombotin-like 1) [Source:HGNC Symbol;Acc:6642]	111	95	0	4	4.32807	4.47617	0	0.180947
ENSG00000119922	33.6919	457.448	-3.4584	9.7668e-52	7.1829e-50	IFIT2	protein_coding	interferon-induced protein with tetratricopeptide repeats 2 [Source:HGNC Symbol;Acc:5409]	515	394	37	32	7.97127	7.36932	0.621429	0.574633
ENSG00000166592	46.8376	613.341	-3.4558	5.436e-58	4.6098e-56	RRAD	protein_coding	Ras-related associated with diabetes [Source:HGNC Symbol;Acc:10446]	644	567	34	61	37.6388	40.0445	2.15624	4.13618
ENSG00000065618	125.193	1469.24	-3.4494	1.8994e-132	7.5168e-130	COL17A1	protein_coding	collagen, type XVII, alpha 1 [Source:HGNC Symbol;Acc:2194]	1597	1313	149	108	40.1506	39.8899	4.06483	3.15015
ENSG00000167772	30.9666	432.631	-3.4277	1.8396e-43	1.0091e-41	ANGPTL4	protein_coding	angiopoietin-like 4 [Source:HGNC Symbol;Acc:16039]	471	386	45	19	22.1179	21.9039	2.29301	1.03514
ENSG00000137462	15.6029	250.82	-3.4273	3.6892e-32	1.3301e-30	TLR2	protein_coding	toll-like receptor 2 [Source:HGNC Symbol;Acc:11848]	262	233	18	14	3.36879	3.62025	0.251139	0.208843
ENSG00000135269	32.4234	431.433	-3.4139	1.461e-47	9.0612e-46	TES	protein_coding	testis derived transcript (3 LIM domains) [Source:HGNC Symbol;Acc:14620]	448	403	28	38	21.3347	23.1913	1.44689	2.09948
ENSG00000197496	0.978502	86.3224	-3.4128	2.184e-17	3.817e-16	SLC2A10	protein_coding	solute carrier family 2 (facilitated glucose transporter), member 10 [Source:HGNC Symbol;Acc:13444]	94	77	1	1	2.0873	2.06614	0.024095	0.0257619
ENSG00000152766	14.2547	233.036	-3.4082	4.5143e-30	1.4598e-28	ANKRD22	protein_coding	ankyrin repeat domain 22 [Source:HGNC Symbol;Acc:28321]	244	216	12	17	12.8555	13.7519	0.686038	1.03912
ENSG00000181031	6.90266	154.496	-3.4068	1.2464e-22	2.9137e-21	RPH3AL	protein_coding	rabphilin 3A-like (without C2 domains) [Source:HGNC Symbol;Acc:10296]	150	153	5	9	9.63201	11.8721	0.348389	0.670483
ENSG00000141750	25.3082	352.511	-3.403	8.8901e-41	4.505e-39	STAC2	protein_coding	SH3 and cysteine rich domain 2 [Source:HGNC Symbol;Acc:23990]	394	306	31	21	7.58011	7.11396	0.647157	0.468725
ENSG00000115008	170.602	1891.69	-3.3997	4.61e-175	2.7365e-172	IL1A	protein_coding	interleukin 1, alpha [Source:HGNC Symbol;Acc:5991]	2046	1699	180	169	52.0203	52.2001	4.96602	4.9851
ENSG00000076356	55.748	672.333	-3.3989	3.456e-71	4.103e-69	PLXNA2	protein_coding	plexin A2 [Source:HGNC Symbol;Acc:9100]	733	599	58	56	14.087	13.9108	1.20952	1.2486
ENSG00000095970	1.50761	92.3426	-3.3945	1.4652e-17	2.5799e-16	TREM2	protein_coding	triggering receptor expressed on myeloid cells 2 [Source:HGNC Symbol;Acc:17761]	101	82	0	3	5.61147	5.50529	0	0.193373
ENSG00000114200	3.91401	117.442	-3.3862	1.0268e-19	2.034e-18	BCHE	protein_coding	butyrylcholinesterase [Source:HGNC Symbol;Acc:983]	130	103	4	4	4.36867	4.18267	0.145859	0.15595
ENSG00000116852	11.8483	204.135	-3.3755	1.275e-26	3.5144e-25	KIF21B	protein_coding	kinesin family member 21B [Source:HGNC Symbol;Acc:29442]	226	179	8	16	2.04298	1.95533	0.0784721	0.167802
ENSG00000086570	12.7205	209.787	-3.3689	5.9064e-28	1.7406e-26	FAT2	protein_coding	FAT tumor suppressor homolog 2 (Drosophila) [Source:HGNC Symbol;Acc:3596]	225	190	13	13	1.25434	1.27996	0.0786402	0.0840806
ENSG00000173432	100.812	1128.39	-3.3687	1.3821e-107	3.3783e-105	SAA1	protein_coding	serum amyloid A1 [Source:HGNC Symbol;Acc:10513]	1269	973	102	104	109.824	101.756	9.57869	10.4422
ENSG00000205809	14.0687	227.482	-3.3594	2.3484e-28	7.0221e-27	KLRC2	protein_coding	killer cell lectin-like receptor subfamily C, member 2 [Source:HGNC Symbol;Acc:6375]	226	221	19	10	14.3586	16.967	1.30986	0.737094
ENSG00000075275	185.49	1987.65	-3.3527	2.524e-176	1.5537e-173	CELSR1	protein_coding	cadherin, EGF LAG seven-pass G-type receptor 1 [Source:HGNC Symbol;Acc:1850]	2138	1795	206	174	30.2884	30.7287	3.16668	2.85981
ENSG00000184584	20.9448	293.419	-3.3466	5.4379e-35	2.2262e-33	TMEM173	protein_coding	transmembrane protein 173 [Source:HGNC Symbol;Acc:27962]	330	253	25	18	17.5405	16.2502	1.44191	1.10999
ENSG00000161570	16.7408	248.961	-3.3367	2.7025e-30	8.8421e-29	CCL5	protein_coding	chemokine (C-C motif) ligand 5 [Source:HGNC Symbol;Acc:10632]	282	213	13	21	13.7322	12.5337	0.686914	1.18639
ENSG00000165390	3.43804	109.945	-3.331	2.0031e-18	3.6547e-17	ANXA8	protein_coding	annexin A8 [Source:HGNC Symbol;Acc:546]	103	112	3	4	3.46997	4.5595	0.109668	0.156339
ENSG00000169129	16.5282	243.874	-3.3172	5.3798e-30	1.7262e-28	AFAP1L2	protein_coding	actin filament associated protein 1-like 2 [Source:HGNC Symbol;Acc:25901]	253	228	21	13	5.74795	6.25948	0.517703	0.342654
ENSG00000130881	28.6665	366.311	-3.3061	9.2857e-40	4.4996e-38	LRP3	protein_coding	low density lipoprotein receptor-related protein 3 [Source:HGNC Symbol;Acc:6695]	413	315	37	22	11.6467	10.7343	1.1322	0.719773
ENSG00000082482	6.37355	137.63	-3.3038	1.3109e-20	2.7339e-19	KCNK2	protein_coding	potassium channel, subfamily K, member 2 [Source:HGNC Symbol;Acc:6277]	164	111	6	7	6.29464	5.14827	0.249889	0.311706
ENSG00000242366	1.50761	86.3224	-3.2927	2.1178e-16	3.4955e-15	UGT1A8	protein_coding	UDP glucuronosyltransferase 1 family, polypeptide A8 [Source:HGNC Symbol;Acc:12540]	94	77	0	3	2.10898	2.0876	0	0.0780884
ENSG00000165092	9.67873	170.612	-3.2667	1.3612e-22	3.1776e-21	ALDH1A1	protein_coding	aldehyde dehydrogenase 1 family, member A1 [Source:HGNC Symbol;Acc:402]	168	167	14	6	10.1939	12.245	0.921783	0.422379
ENSG00000104419	562.213	5484.03	-3.2579	0	0	NDRG1	protein_coding	N-myc downstream regulated 1 [Source:HGNC Symbol;Acc:7679]	6106	4780	591	559	247.556	234.183	26	26.2935
ENSG00000134802	16.132	227.198	-3.2538	1.7551e-28	5.3233e-27	SLC43A3	protein_coding	solute carrier family 43, member 3 [Source:HGNC Symbol;Acc:17466]	247	203	17	16	12.9378	12.849	0.966231	0.972306
ENSG00000160190	11.7686	181.534	-3.2241	6.0884e-24	1.4838e-22	SLC37A1	protein_coding	solute carrier family 37 (glycerol-3-phosphate transporter), member 1 [Source:HGNC Symbol;Acc:11024]	206	155	11	13	8.84317	8.04051	0.512392	0.647447
ENSG00000134321	0	65.6699	-3.2077	1.4287e-14	2.0524e-13	RSAD2	protein_coding	radical S-adenosyl methionine domain containing 2 [Source:HGNC Symbol;Acc:30908]	65	64	0	0	2.8867	3.43462	0	0
ENSG00000106789	9.73187	161.998	-3.2072	7.6449e-22	1.6942e-20	CORO2A	protein_coding	coronin, actin binding protein, 2A [Source:HGNC Symbol;Acc:2255]	159	159	12	8	1.54796	1.87056	0.126769	0.0903594
ENSG00000118640	6.84951	132.999	-3.1991	2.1019e-19	4.0623e-18	VAMP8	protein_coding	vesicle-associated membrane protein 8 [Source:HGNC Symbol;Acc:12647]	160	106	7	7	11.5515	9.24776	0.548387	0.586324
ENSG00000160867	55.5886	586.659	-3.1991	1.0836e-58	9.4294e-57	FGFR4	protein_coding	fibroblast growth factor receptor 4 [Source:HGNC Symbol;Acc:3691]	638	524	64	50	26.181	25.9841	2.8498	2.38043
ENSG00000108947	0.502538	70.3941	-3.1924	1.0476e-14	1.522e-13	EFNB3	protein_coding	ephrin-B3 [Source:HGNC Symbol;Acc:3228]	68	70	0	1	1.13974	1.41777	0	0.0194454
ENSG00000137843	5.81786	123.375	-3.1893	1.8912e-18	3.4542e-17	PAK6	protein_coding	p21 protein (Cdc42/Rac)-activated kinase 6 [Source:HGNC Symbol;Acc:16061]	120	122	8	4	4.0052	4.92055	0.289736	0.15489
ENSG00000196542	2.90893	94.7555	-3.1776	3.9893e-16	6.4312e-15	SPTSSB	protein_coding	serine palmitoyltransferase, small subunit B [Source:HGNC Symbol;Acc:24045]	87	98	4	2	3.02336	4.11536	0.150834	0.0806344
ENSG00000132182	21.6068	266.469	-3.1762	9.6532e-31	3.2479e-29	NUP210	protein_coding	nucleoporin 210kDa [Source:HGNC Symbol;Acc:30052]	291	237	19	25	5.1899	5.10769	0.367695	0.51728
ENSG00000143217	6.34698	124.76	-3.1738	8.6205e-19	1.6208e-17	PVRL4	protein_coding	poliovirus receptor-related 4 [Source:HGNC Symbol;Acc:19688]	135	112	7	6	4.08429	4.09461	0.2298	0.210598
ENSG00000101336	3.43804	96.8793	-3.1629	2.1755e-16	3.5801e-15	HCK	protein_coding	hemopoietic cell kinase [Source:HGNC Symbol;Acc:4840]	112	81	3	4	3.12578	2.73172	0.0908512	0.129515
ENSG00000105376	7.82802	137.262	-3.1577	1.1541e-19	2.2837e-18	ICAM5	protein_coding	intercellular adhesion molecule 5, telencephalin [Source:HGNC Symbol;Acc:5348]	156	117	8	8	5.45631	4.94505	0.303622	0.324627
ENSG00000151490	8.27741	141.62	-3.1527	6.4116e-20	1.2892e-18	PTPRO	protein_coding	protein tyrosine phosphatase, receptor type, O [Source:HGNC Symbol;Acc:9678]	145	134	10	7	3.19091	3.56338	0.23879	0.178717
ENSG00000091129	236.848	2184.28	-3.1497	7.0121e-180	4.8562e-177	NRCAM	protein_coding	neuronal cell adhesion molecule [Source:HGNC Symbol;Acc:7994]	2361	1963	259	226	48.278	48.5047	5.74674	5.36144
ENSG00000162706	2.45954	85.4877	-3.1305	2.4192e-15	3.689e-14	CADM3	protein_coding	cell adhesion molecule 3 [Source:HGNC Symbol;Acc:17601]	97	73	2	3	2.66176	2.42064	0.0595519	0.0955075
ENSG00000130066	268.428	2427.85	-3.1265	2.1654e-183	1.7138e-180	SAT1	protein_coding	spermidine/spermine N1-acetyltransferase 1 [Source:HGNC Symbol;Acc:10540]	2695	2123	262	286	167.865	159.795	17.7081	20.6675
ENSG00000131203	12.7737	178.199	-3.1144	1.7837e-22	4.1232e-21	IDO1	protein_coding	indoleamine 2,3-dioxygenase 1 [Source:HGNC Symbol;Acc:6059]	206	149	11	15	10.6253	9.28692	0.615654	0.897607
ENSG00000027869	4.33682	104.386	-3.1111	2.6005e-16	4.2668e-15	SH2D2A	protein_coding	SH2 domain containing 2A [Source:HGNC Symbol;Acc:10821]	103	102	7	2	4.56679	5.46494	0.336776	0.102878
ENSG00000182195	0	61.8733	-3.1086	1.1505e-13	1.5397e-12	LDOC1	protein_coding	leucine zipper, down-regulated in cancer 1 [Source:HGNC Symbol;Acc:6548]	58	63	0	0	2.90826	3.81731	0	0
ENSG00000101307	31.5489	339.908	-3.0647	1.4244e-32	5.2495e-31	SIRPB1	protein_coding	signal-regulatory protein beta 1 [Source:HGNC Symbol;Acc:15928]	404	275	42	23	18.2878	15.0427	2.063	1.20789
ENSG00000125798	21.5005	244.151	-3.0555	6.9221e-28	2.022e-26	FOXA2	protein_coding	forkhead box A2 [Source:HGNC Symbol;Acc:5022]	256	226	23	21	5.72696	6.10947	0.558317	0.545034
ENSG00000008513	86.2145	784.402	-3.0523	1.8374e-71	2.1971e-69	ST3GAL1	protein_coding	ST3 beta-galactoside alpha-2,3-sialyltransferase 1 [Source:HGNC Symbol;Acc:10862]	861	694	84	92	23.9305	23.3087	2.53336	2.96658
ENSG00000088340	13.2231	172.552	-3.0443	9.2498e-22	2.0444e-20	FER1L4	pseudogene	fer-1-like 4 (C. elegans) pseudogene [Source:HGNC Symbol;Acc:15801]	189	153	13	14	4.39752	4.30178	0.328215	0.377915
ENSG00000115648	1.42789	73.9154	-3.0307	1.2156e-13	1.6203e-12	MLPH	protein_coding	melanophilin [Source:HGNC Symbol;Acc:29643]	66	78	3	0	2.66983	3.81281	0.131683	0
ENSG00000135074	64.6851	601.123	-3.0173	1.2673e-50	9.0406e-49	ADAM19	protein_coding	ADAM metallopeptidase domain 19 [Source:HGNC Symbol;Acc:197]	602	580	81	52	9.31788	10.8482	1.36042	0.933779
ENSG00000175264	0	57.612	-3.0129	7.6689e-13	9.5982e-12	CHST1	protein_coding	carbohydrate (keratan sulfate Gal-6) sulfotransferase 1 [Source:HGNC Symbol;Acc:1969]	56	57	0	0	1.97402	2.428	0	0
ENSG00000077264	2.45954	80.0285	-3.0019	6.2003e-14	8.5029e-13	PAK3	protein_coding	p21 protein (Cdc42/Rac)-activated kinase 3 [Source:HGNC Symbol;Acc:8592]	72	84	2	3	1.9991	2.81833	0.0602561	0.0966369
ENSG00000255346	4.86594	99.3851	-2.9964	2.3296e-15	3.5555e-14	NOX5	protein_coding	NADPH oxidase, EF-hand calcium binding domain 5 [Source:HGNC Symbol;Acc:14874]	97	98	6	4	1.72031	2.10025	0.115466	0.0823027
ENSG00000131746	12.2446	158.009	-2.9851	5.2518e-20	1.0606e-18	TNS4	protein_coding	tensin 4 [Source:HGNC Symbol;Acc:24352]	178	136	12	13	5.22993	4.82865	0.382584	0.443138
ENSG00000214548	2.98865	85.2158	-2.9801	6.4952e-14	8.878e-13	MEG3	lincRNA	maternally expressed 3 (non-protein coding) [Source:HGNC Symbol;Acc:14575]	76	90	1	5	2.14883	3.07497	0.0306801	0.164013
ENSG00000150540	5.81786	106.142	-2.9782	1.0091e-15	1.5779e-14	HNMT	protein_coding	histamine N-methyltransferase [Source:HGNC Symbol;Acc:5028]	120	91	8	4	6.42261	5.88549	0.464611	0.248376
ENSG00000198729	0.475964	60.2985	-2.9634	1.2899e-12	1.5881e-11	PPP1R14C	protein_coding	protein phosphatase 1, regulatory (inhibitor) subunit 14C [Source:HGNC Symbol;Acc:14952]	57	61	1	0	1.43039	1.84978	0.02723	0
ENSG00000247095	18.2484	205.713	-2.9551	1.5837e-22	3.6866e-21	MIR210HG	processed_transcript	MIR210 host gene (non-protein coding) [Source:HGNC Symbol;Acc:39524]	215	191	13	24	12.1962	13.0927	0.800197	1.57949
ENSG00000145423	2.43297	75.5797	-2.9512	1.7741e-13	2.331e-12	SFRP2	protein_coding	secreted frizzled-related protein 2 [Source:HGNC Symbol;Acc:10777]	78	71	3	2	2.07297	2.28017	0.0865143	0.0616663
ENSG00000167941	166.981	1354.75	-2.9439	2.3761e-105	5.4851e-103	SOST	protein_coding	sclerostin [Source:HGNC Symbol;Acc:13771]	1531	1162	165	176	35.9475	32.9694	4.20384	4.79431
ENSG00000129270	0	54.5519	-2.9348	3.3818e-12	4.0236e-11	MMP28	protein_coding	matrix metallopeptidase 28 [Source:HGNC Symbol;Acc:14366]	65	44	0	0	2.43259	1.98984	0	0
ENSG00000168209	286.725	2269.92	-2.9249	1.7702e-135	7.3554e-133	DDIT4	protein_coding	DNA-damage-inducible transcript 4 [Source:HGNC Symbol;Acc:24944]	2223	2232	311	276	119.215	144.643	18.0976	17.172
ENSG00000107551	35.9654	336.306	-2.9148	3.6661e-32	1.3246e-30	RASSF4	protein_coding	Ras association (RalGDS/AF-6) domain family member 4 [Source:HGNC Symbol;Acc:20793]	365	301	46	28	13.4456	13.3988	1.83871	1.19665
ENSG00000182809	41.0705	369.272	-2.9061	9.1196e-36	3.8471e-34	CRIP2	protein_coding	cysteine-rich protein 2 [Source:HGNC Symbol;Acc:2361]	423	312	43	41	18.9415	16.8826	2.08935	2.12999
ENSG00000146122	5.84444	101.146	-2.8994	9.2349e-15	1.3441e-13	DAAM2	protein_coding	dishevelled associated activator of morphogenesis 2 [Source:HGNC Symbol;Acc:18143]	96	102	7	5	1.90181	2.44178	0.150474	0.114917
ENSG00000134339	28.0335	269.615	-2.8914	5.818e-27	1.6307e-25	SAA2	protein_coding	serum amyloid A2 [Source:HGNC Symbol;Acc:10514]	305	231	23	34	23.8021	21.784	1.94766	3.07832
ENSG00000130707	500.22	3796.03	-2.8904	1.8256e-227	3.0344e-224	ASS1	protein_coding	argininosuccinate synthase 1 [Source:HGNC Symbol;Acc:758]	4213	3320	560	465	240.25	228.781	34.652	30.7641
ENSG00000118946	18.089	191.538	-2.8857	6.7451e-22	1.4988e-20	PCDH17	protein_coding	protocadherin 17 [Source:HGNC Symbol;Acc:14267]	212	168	19	18	1.90558	1.82478	0.185317	0.187709
ENSG00000100628	15.1269	169.963	-2.8807	6.8506e-20	1.3735e-18	ASB2	protein_coding	ankyrin repeat and SOCS box containing 2 [Source:HGNC Symbol;Acc:16012]	169	165	17	14	7.00966	8.27	0.765118	0.673688
ENSG00000144354	26.8955	256.375	-2.8796	4.9406e-27	1.3918e-25	CDCA7	protein_coding	cell division cycle associated 7 [Source:HGNC Symbol;Acc:14628]	274	233	28	27	7.19696	7.39546	0.798041	0.822777
ENSG00000147246	12.6408	150.419	-2.8666	3.6747e-18	6.6389e-17	HTR2C	protein_coding	5-hydroxytryptamine (serotonin) receptor 2C, G protein-coupled [Source:HGNC Symbol;Acc:5295]	152	144	16	10	1.94055	2.22154	0.221651	0.148116
ENSG00000197261	0.475964	58.7272	-2.8454	1.308e-11	1.487e-10	C6orf141	protein_coding	chromosome 6 open reading frame 141 [Source:HGNC Symbol;Acc:21351]	44	69	1	0	2.21449	4.19645	0.0546123	0
ENSG00000177508	7.24576	109.386	-2.8449	8.693e-15	1.2708e-13	IRX3	protein_coding	iroquois homeobox 3 [Source:HGNC Symbol;Acc:14360]	115	101	11	4	5.34458	5.67215	0.554724	0.215673
ENSG00000145283	0.475964	54.6466	-2.8363	1.4213e-11	1.6082e-10	SLC10A6	protein_coding	solute carrier family 10 (sodium/bile acid cotransporter family), member 6 [Source:HGNC Symbol;Acc:30603]	58	50	1	0	2.8142	2.93162	0.0526496	0
ENSG00000163734	333.273	2450.16	-2.8361	3.6279e-165	2.0793e-162	CXCL3	protein_coding	chemokine (C-X-C motif) ligand 3 [Source:HGNC Symbol;Acc:4604]	2748	2119	337	344	143.661	133.864	19.117	20.8641
ENSG00000158125	86.8499	681.403	-2.8323	5.6688e-55	4.5517e-53	XDH	protein_coding	xanthine dehydrogenase [Source:HGNC Symbol;Acc:12805]	767	587	79	98	18.4256	17.0402	2.05931	2.73131
ENSG00000171056	45.6996	385.765	-2.8317	9.8419e-35	3.9704e-33	SOX7	protein_coding	SRY (sex determining region Y)-box 7 [Source:HGNC Symbol;Acc:18196]	419	345	39	54	9.10561	9.05993	0.919663	1.36147
ENSG00000168453	16.5548	174.495	-2.83	8.6334e-20	1.7185e-18	HR	protein_coding	hair growth associated [Source:HGNC Symbol;Acc:5172]	198	149	20	14	5.17805	4.70867	0.567545	0.424766
ENSG00000204060	8.35713	115.503	-2.8296	3.417e-15	5.1444e-14	FOXO6	protein_coding	forkhead box O6 [Source:HGNC Symbol;Acc:24814]	109	117	7	10	2.4547	3.18397	0.171056	0.261272
ENSG00000002933	2.93551	73.1685	-2.8236	1.7448e-12	2.1199e-11	TMEM176A	protein_coding	transmembrane protein 176A [Source:HGNC Symbol;Acc:24930]	86	60	3	3	4.53545	3.8237	0.171677	0.183554
ENSG00000132535	45.9099	378.267	-2.8053	2.1125e-35	8.822e-34	DLG4	protein_coding	discs, large homolog 4 (Drosophila) [Source:HGNC Symbol;Acc:2903]	398	349	50	44	12.673	13.4286	1.72757	1.62543
ENSG00000060656	414.378	2941.23	-2.7889	1.0436e-177	6.6712e-175	PTPRU	protein_coding	protein tyrosine phosphatase, receptor type, U [Source:HGNC Symbol;Acc:9683]	3302	2541	462	387	60.3246	56.0961	9.15858	8.20253
ENSG00000213853	2.45954	67.7971	-2.7883	6.0547e-12	7.0423e-11	EMP2	protein_coding	epithelial membrane protein 2 [Source:HGNC Symbol;Acc:3334]	78	57	2	3	1.66164	1.46733	0.046232	0.0741455
ENSG00000004399	202.997	1465.07	-2.7861	1.2697e-107	3.1497e-105	PLXND1	protein_coding	plexin D1 [Source:HGNC Symbol;Acc:9107]	1606	1298	228	188	54.9617	53.6785	8.46678	7.46436
ENSG00000162496	55.3518	433.743	-2.7707	7.051e-39	3.292e-37	DHRS3	protein_coding	dehydrogenase/reductase (SDR family) member 3 [Source:HGNC Symbol;Acc:17693]	471	388	54	59	24.6708	24.5587	3.0692	3.58538
ENSG00000119714	46.4124	371.69	-2.7669	2.37e-34	9.3347e-33	GPR68	protein_coding	G protein-coupled receptor 68 [Source:HGNC Symbol;Acc:4519]	391	343	50	45	10.2303	10.8447	1.41955	1.36598
ENSG00000124731	3.88743	77.805	-2.753	3.2467e-12	3.8711e-11	TREM1	protein_coding	triggering receptor expressed on myeloid cells 1 [Source:HGNC Symbol;Acc:17760]	72	80	5	3	3.19495	4.28975	0.240752	0.154444
ENSG00000160223	20.1523	189.685	-2.7482	5.5198e-20	1.1121e-18	ICOSLG	protein_coding	inducible T-cell co-stimulator ligand [Source:HGNC Symbol;Acc:17087]	214	163	17	24	3.03247	2.79114	0.261397	0.394561
ENSG00000182585	8.70022	114.196	-2.7439	4.3002e-14	5.9462e-13	EPGN	protein_coding	epithelial mitogen [Source:HGNC Symbol;Acc:17470]	141	88	13	5	14.0489	10.5954	1.40551	0.577979
ENSG00000197142	93.2766	683.533	-2.7395	8.9031e-52	6.5769e-50	ACSL5	protein_coding	acyl-CoA synthetase long-chain family member 5 [Source:HGNC Symbol;Acc:16526]	768	590	83	107	19.619	18.2129	2.30072	3.17118
ENSG00000184916	9.94446	477.643	-2.7353	1.044e-10	1.0872e-09	JAG2	protein_coding	jagged 2 [Source:HGNC Symbol;Acc:6189]	525	422	4	16	9.16644	8.90358	0.0757828	0.324102
ENSG00000159339	24.3031	219.519	-2.7318	3.872e-21	8.2828e-20	PADI4	protein_coding	peptidyl arginine deiminase, type IV [Source:HGNC Symbol;Acc:18368]	210	220	31	19	12.6996	16.0769	2.03423	1.33304
ENSG00000110427	30.1475	258.033	-2.727	1.438e-23	3.479e-22	KIAA1549L	protein_coding	KIAA1549-like [Source:HGNC Symbol;Acc:24836]	310	206	38	24	2.20888	1.77373	0.293807	0.1984
ENSG00000183570	54.081	415.303	-2.7247	3.7698e-35	1.5625e-33	PCBP3	protein_coding	poly(rC) binding protein 3 [Source:HGNC Symbol;Acc:8651]	478	349	64	47	23.4031	20.6482	3.40013	2.66971
ENSG00000107249	29.6184	255.735	-2.7215	7.3126e-23	1.7191e-21	GLIS3	protein_coding	GLIS family zinc finger 3 [Source:HGNC Symbol;Acc:28510]	245	256	39	22	8.10217	10.2302	1.39949	0.844069
ENSG00000061918	1.48104	57.6102	-2.7212	5.3873e-11	5.751e-10	GUCY1B3	protein_coding	guanylate cyclase 1, soluble, beta 3 [Source:HGNC Symbol;Acc:4687]	62	52	1	2	1.3655	1.38393	0.0238985	0.0511035
ENSG00000085117	301.161	2054.53	-2.7158	3.4947e-121	1.1389e-118	CD82	protein_coding	CD82 molecule [Source:HGNC Symbol;Acc:6210]	2178	1882	354	264	142.569	148.867	25.1443	20.0489
ENSG00000155495	42.4984	331.953	-2.7128	1.0412e-30	3.4822e-29	MAGEC1	protein_coding	melanoma antigen family C, 1 [Source:HGNC Symbol;Acc:6812]	358	299	46	41	9.72008	9.80999	1.35523	1.29149
ENSG00000233901	4.91908	81.7823	-2.7123	2.7297e-12	3.2758e-11	RP11-65J3.1	lincRNA	-	95	68	4	6	7.50048	6.48762	0.342684	0.549587
ENSG00000132130	15.1003	151.615	-2.7091	6.9048e-17	1.1711e-15	LHX1	protein_coding	LIM homeobox 1 [Source:HGNC Symbol;Acc:6593]	181	122	18	13	5.81477	4.73614	0.627473	0.484526
ENSG00000244122	10.6838	120.778	-2.6992	8.9618e-15	1.308e-13	UGT1A7	protein_coding	UDP glucuronosyltransferase 1 family, polypeptide A7 [Source:HGNC Symbol;Acc:12539]	130	109	14	8	3.05769	3.09804	0.357311	0.218303
ENSG00000186684	0	46.7711	-2.6982	2.1068e-10	2.13e-09	CYP27C1	protein_coding	cytochrome P450, family 27, subfamily C, polypeptide 1 [Source:HGNC Symbol;Acc:33480]	59	35	0	0	0.981276	0.703425	0	0
ENSG00000100302	15.656	152.264	-2.6891	6.1789e-17	1.049e-15	RASD2	protein_coding	RASD family, member 2 [Source:HGNC Symbol;Acc:18229]	180	124	16	16	2.84895	2.37162	0.27479	0.2938
ENSG00000163739	220.083	1475.9	-2.688	1.068e-106	2.5727e-104	CXCL1	protein_coding	chemokine (C-X-C motif) ligand 1 (melanoma growth stimulating activity, alpha) [Source:HGNC Symbol;Acc:4602]	1627	1300	228	222	105.1	101.477	15.9816	16.6375
ENSG00000099260	0	45.661	-2.6828	2.6873e-10	2.6907e-09	PALMD	protein_coding	palmdelphin [Source:HGNC Symbol;Acc:15846]	53	38	0	0	0.954697	0.82715	0	0
ENSG00000183486	24.0397	205.154	-2.6779	1.0492e-20	2.1991e-19	MX2	protein_coding	myxovirus (influenza virus) resistance 2 (mouse) [Source:HGNC Symbol;Acc:7533]	227	180	22	27	7.70508	7.38303	0.810295	1.06325
ENSG00000231574	27.3715	226.087	-2.677	1.7406e-22	4.0293e-21	RP11-91K9.1	lincRNA	-	247	201	29	27	7.54033	7.41482	0.96064	0.956263
ENSG00000233718	2.90893	66.1294	-2.6708	4.3291e-11	4.6723e-10	MYCNOS	antisense	MYCN opposite strand/antisense RNA [Source:HGNC Symbol;Acc:16911]	78	54	4	2	6.01753	5.03417	0.334852	0.179008
ENSG00000007933	27.5044	227.47	-2.6647	1.873e-21	4.0536e-20	FMO3	protein_coding	flavin containing monooxygenase 3 [Source:HGNC Symbol;Acc:3771]	268	186	24	32	11.3513	9.51996	1.10304	1.57247
ENSG00000154096	16.132	151.249	-2.6581	7.5567e-17	1.2751e-15	THY1	protein_coding	Thy-1 cell surface antigen [Source:HGNC Symbol;Acc:11801]	167	133	17	16	7.22642	6.95456	0.798224	0.803243
ENSG00000137745	25.8904	212.379	-2.6484	3.6012e-21	7.7133e-20	MMP13	protein_coding	matrix metallopeptidase 13 (collagenase 3) [Source:HGNC Symbol;Acc:7159]	233	188	28	25	6.01185	5.86166	0.783934	0.748363
ENSG00000185352	13.6459	135.038	-2.6468	1.9441e-15	2.9781e-14	HS6ST3	protein_coding	heparan sulfate 6-O-sulfotransferase 3 [Source:HGNC Symbol;Acc:19134]	156	113	16	12	5.07808	4.44492	0.56515	0.453186
ENSG00000019582	1.42789	57.0578	-2.6455	2.3678e-10	2.3822e-09	CD74	protein_coding	CD74 molecule, major histocompatibility complex, class II invariant chain [Source:HGNC Symbol;Acc:1697]	50	61	3	0	2.98032	4.39374	0.194037	0
ENSG00000113657	71.1649	503.319	-2.6388	3.6864e-37	1.6339e-35	DPYSL3	protein_coding	dihydropyrimidinase-like 3 [Source:HGNC Symbol;Acc:3015]	482	504	83	63	15.8814	20.0671	2.96749	2.40826
ENSG00000163638	133.129	884.821	-2.638	1.1688e-64	1.1992e-62	ADAMTS9	protein_coding	ADAM metallopeptidase with thrombospondin type 1 motif, 9 [Source:HGNC Symbol;Acc:13202]	905	838	134	138	14.8867	16.6573	2.3918	2.6336
ENSG00000162366	8.33055	99.4764	-2.6359	5.2035e-13	6.5921e-12	PDZK1IP1	protein_coding	PDZK1 interacting protein 1 [Source:HGNC Symbol;Acc:16887]	102	94	8	9	7.12594	7.93562	0.606458	0.729465
ENSG00000158292	30.2273	237.571	-2.63	1.3898e-22	3.2397e-21	GPR153	protein_coding	G protein-coupled receptor 153 [Source:HGNC Symbol;Acc:23618]	261	210	35	27	3.45294	3.35721	0.502442	0.414412
ENSG00000149295	1.45447	55.3832	-2.6193	3.6563e-10	3.6088e-09	DRD2	protein_coding	dopamine receptor D2 [Source:HGNC Symbol;Acc:3023]	74	38	2	1	2.44569	1.51762	0.0717247	0.0383433
ENSG00000162383	5.36847	82.056	-2.6162	2.0833e-11	2.3193e-10	SLC1A7	protein_coding	solute carrier family 1 (glutamate transporter), member 7 [Source:HGNC Symbol;Acc:10945]	110	56	6	5	2.84093	1.7477	0.168146	0.149816
ENSG00000090776	179.672	1147.94	-2.6048	1.1829e-81	1.7712e-79	EFNB1	protein_coding	ephrin-B1 [Source:HGNC Symbol;Acc:3226]	1262	1014	198	170	20.565	19.9672	3.50109	3.21394
ENSG00000189280	0.951928	50.2011	-2.6008	6.4296e-10	6.1772e-09	GJB5	protein_coding	gap junction protein, beta 5, 31.1kDa [Source:HGNC Symbol;Acc:4287]	52	47	2	0	2.07246	2.26355	0.086493	0
ENSG00000108018	5.95073	84.1005	-2.5994	1.743e-11	1.9536e-10	SORCS1	protein_coding	sortilin-related VPS10 domain containing receptor 1 [Source:HGNC Symbol;Acc:16697]	88	78	3	9	2.04576	2.19118	0.0756768	0.242736
ENSG00000001617	161.663	1027.17	-2.5894	1.1008e-73	1.386e-71	SEMA3F	protein_coding	sema domain, immunoglobulin domain (Ig), short basic domain, secreted, (semaphorin) 3F [Source:HGNC Symbol;Acc:10728]	1078	950	176	155	33.866	36.0645	5.99967	5.64934
ENSG00000135472	0.502538	46.2169	-2.5892	9.7618e-10	9.1979e-09	FAIM2	protein_coding	Fas apoptotic inhibitory molecule 2 [Source:HGNC Symbol;Acc:17067]	53	39	0	1	1.89549	1.68547	0	0.041492
ENSG00000168528	201.224	1255.67	-2.5684	1.0145e-77	1.417e-75	SERINC2	protein_coding	serine incorporator 2 [Source:HGNC Symbol;Acc:23231]	1329	1152	238	175	36.8243	38.5721	7.15576	5.62559
ENSG00000179403	5.31533	77.6174	-2.5638	5.3329e-11	5.7038e-10	VWA1	protein_coding	von Willebrand factor A domain containing 1 [Source:HGNC Symbol;Acc:30910]	80	73	8	3	1.7706	1.95238	0.192128	0.0770323
ENSG00000224184	1.48104	52.2406	-2.5593	9.6346e-10	9.0883e-09	AC096559.1	lincRNA	-	48	54	1	2	3.50293	4.76205	0.0791879	0.169332
ENSG00000155849	15.6826	138.377	-2.5545	4.759e-15	7.0624e-14	ELMO1	protein_coding	engulfment and cell motility 1 [Source:HGNC Symbol;Acc:16286]	144	129	15	17	5.52701	5.98312	0.624723	0.757001
ENSG00000073756	500.336	3004.19	-2.5517	1.6173e-147	7.6804e-145	PTGS2	protein_coding	prostaglandin-endoperoxide synthase 2 (prostaglandin G/H synthase and cyclooxygenase) [Source:HGNC Symbol;Acc:9605]	3121	2805	480	541	74.0856	80.4607	12.3638	14.899
ENSG00000261578	37.1565	263.137	-2.5397	1.5162e-23	3.6524e-22	RP11-21L23.2	sense_overlapping	-	279	241	39	37	3.59422	3.7517	0.545172	0.552996
ENSG00000134533	8.85967	97.2545	-2.5395	4.6452e-12	5.4719e-11	RERG	protein_coding	RAS-like, estrogen-regulated, growth inhibitor [Source:HGNC Symbol;Acc:15980]	96	95	7	11	4.18429	5.00362	0.331068	0.556241
ENSG00000132185	17.1636	145.136	-2.5341	2.5226e-15	3.8431e-14	FCRLA	protein_coding	Fc receptor-like A [Source:HGNC Symbol;Acc:18504]	161	127	16	19	5.20009	4.95678	0.560756	0.711965
ENSG00000080573	83.5689	529.324	-2.5252	4.8346e-41	2.4801e-39	COL5A3	protein_coding	collagen, type V, alpha 3 [Source:HGNC Symbol;Acc:14864]	585	465	89	82	9.02371	8.66749	1.48966	1.46745
ENSG00000204291	40.0389	277.307	-2.5247	2.7028e-24	6.7453e-23	COL15A1	protein_coding	collagen, type XV, alpha 1 [Source:HGNC Symbol;Acc:2192]	300	249	44	38	8.14941	8.17364	1.29696	1.19759
ENSG00000134323	23.8271	185.054	-2.5239	1.7681e-17	3.1065e-16	MYCN	protein_coding	v-myc myelocytomatosis viral related oncogene, neuroblastoma derived (avian) [Source:HGNC Symbol;Acc:7559]	210	158	30	19	4.35846	3.96262	0.675623	0.457497
ENSG00000212993	21.0777	165.974	-2.514	1.6562e-16	2.7527e-15	POU5F1B	protein_coding	POU class 5 homeobox 1B [Source:HGNC Symbol;Acc:9223]	188	142	20	23	2.92584	2.67049	0.337747	0.415279
ENSG00000121858	1.48104	50.3836	-2.5136	2.0503e-09	1.8598e-08	TNFSF10	protein_coding	tumor necrosis factor (ligand) superfamily, member 10 [Source:HGNC Symbol;Acc:11925]	62	39	1	2	3.08876	2.34784	0.0540582	0.115596
ENSG00000146674	179.725	1074.59	-2.5097	3.2551e-74	4.13e-72	IGFBP3	protein_coding	insulin-like growth factor binding protein 3 [Source:HGNC Symbol;Acc:5472]	1148	977	196	172	57.9943	59.6416	10.7441	10.0807
ENSG00000185100	8.93939	99.75	-2.5088	2.043e-11	2.2759e-10	ADSSL1	protein_coding	adenylosuccinate synthase like 1 [Source:HGNC Symbol;Acc:20093]	117	82	4	14	5.07095	4.29465	0.188119	0.703966
ENSG00000140022	14.6775	127.261	-2.5012	5.7311e-14	7.892e-13	STON2	protein_coding	stonin 2 [Source:HGNC Symbol;Acc:30652]	138	114	15	15	4.40454	4.3968	0.519495	0.555434
ENSG00000060558	174.596	1035.78	-2.4985	3.6938e-72	4.4813e-70	GNA15	protein_coding	guanine nucleotide binding protein (G protein), alpha 15 (Gq class) [Source:HGNC Symbol;Acc:4383]	1129	923	181	176	52.111	51.4811	9.06532	9.42472
ENSG00000165548	3.35832	62.7975	-2.4901	1.0316e-09	9.687e-09	TMEM63C	protein_coding	transmembrane protein 63C [Source:HGNC Symbol;Acc:23787]	66	58	6	1	3.02823	3.21576	0.298721	0.0532311
ENSG00000165757	82.8827	514.131	-2.4887	2.3968e-37	1.0651e-35	KIAA1462	protein_coding	KIAA1462 [Source:HGNC Symbol;Acc:29283]	581	441	77	92	8.9314	8.19205	1.28441	1.64078
ENSG00000171714	11.2661	106.328	-2.4846	1.8365e-12	2.2264e-11	ANO5	protein_coding	anoctamin 5 [Source:HGNC Symbol;Acc:27337]	118	93	11	12	1.71347	1.63188	0.173323	0.202161
ENSG00000087116	1.93043	54.3729	-2.4829	2.8202e-09	2.5134e-08	ADAMTS2	protein_coding	ADAM metallopeptidase with thrombospondin type 1 motif, 2 [Source:HGNC Symbol;Acc:218]	43	62	3	1	1.13386	1.97558	0.0858384	0.0305923
ENSG00000171604	137.73	818.215	-2.4819	5.171e-58	4.4076e-56	CXXC5	protein_coding	CXXC finger protein 5 [Source:HGNC Symbol;Acc:26943]	874	744	150	132	57.2109	58.8507	10.6544	10.0245
ENSG00000149212	118.135	706.232	-2.4767	2.7213e-49	1.8387e-47	SESN3	protein_coding	sestrin 3 [Source:HGNC Symbol;Acc:23060]	769	630	112	129	16.6381	16.4713	2.62944	3.23807
ENSG00000169508	12.6142	115.687	-2.4704	1.4841e-12	1.8151e-11	GPR183	protein_coding	G protein-coupled receptor 183 [Source:HGNC Symbol;Acc:3128]	113	114	17	9	3.58964	4.37611	0.58599	0.331692
ENSG00000161896	3.94058	63.2587	-2.4673	9.6153e-10	9.0752e-09	IP6K3	protein_coding	inositol hexakisphosphate kinase 3 [Source:HGNC Symbol;Acc:17269]	73	53	3	5	1.45149	1.27344	0.0647265	0.11534
ENSG00000099204	125.698	741.977	-2.4657	2.8067e-52	2.1109e-50	ABLIM1	protein_coding	actin binding LIM protein 1 [Source:HGNC Symbol;Acc:78]	833	641	130	127	13.227	12.2994	2.23989	2.33958
ENSG00000111052	0.951928	45.1051	-2.4434	7.8334e-09	6.67e-08	LIN7A	protein_coding	lin-7 homolog A (C. elegans) [Source:HGNC Symbol;Acc:17787]	53	37	2	0	1.33872	1.12934	0.0548167	0
ENSG00000151790	414.571	2312.29	-2.4431	9.6527e-122	3.2087e-119	TDO2	protein_coding	tryptophan 2,3-dioxygenase [Source:HGNC Symbol;Acc:11708]	2467	2105	398	448	122.114	125.91	21.3771	25.7273
ENSG00000088726	4.91908	67.5217	-2.4372	8.4297e-10	7.988e-09	TMEM40	protein_coding	transmembrane protein 40 [Source:HGNC Symbol;Acc:25620]	69	64	4	6	3.33295	3.73569	0.209657	0.336241
ENSG00000120162	33.3222	224.052	-2.4339	1.5732e-19	3.0799e-18	MOB3B	protein_coding	MOB kinase activator 3B [Source:HGNC Symbol;Acc:23825]	233	209	32	36	3.45207	3.7418	0.51445	0.618795
ENSG00000067141	92.9843	541.745	-2.4161	4.2219e-39	1.9935e-37	NEO1	protein_coding	neogenin 1 [Source:HGNC Symbol;Acc:7754]	565	504	94	96	10.3151	11.119	1.86217	2.03336
ENSG00000184564	174.415	986.225	-2.4137	3.0105e-53	2.3603e-51	SLITRK6	protein_coding	SLIT and NTRK-like family, member 6 [Source:HGNC Symbol;Acc:23503]	1070	883	150	205	13.382	13.3447	2.03563	2.97449
ENSG00000184012	6.29383	75.2096	-2.4115	5.7744e-10	5.5735e-09	TMPRSS2	protein_coding	transmembrane protease, serine 2 [Source:HGNC Symbol;Acc:11876]	76	72	9	4	3.03121	3.47013	0.389506	0.18509
ENSG00000247844	315.288	1725.06	-2.4103	1.8822e-106	4.4693e-104	CCAT1	processed_transcript	colon cancer associated transcript 1 (non-protein coding) [Source:HGNC Symbol;Acc:45128]	1865	1550	333	312	47.2625	47.4658	9.15696	9.17303
ENSG00000120899	85.9222	502.381	-2.4096	2.242e-36	9.7549e-35	PTK2B	protein_coding	protein tyrosine kinase 2 beta [Source:HGNC Symbol;Acc:9612]	522	469	95	81	15.0426	16.3319	2.9706	2.70805
ENSG00000104967	54.5569	335.008	-2.4071	1.1322e-25	3.0255e-24	NOVA2	protein_coding	neuro-oncological ventral antigen 2 [Source:HGNC Symbol;Acc:7887]	367	297	65	47	6.54101	6.39655	1.25708	0.971844
ENSG00000165507	50.4061	311.118	-2.4056	1.1361e-24	2.9204e-23	C10orf10	protein_coding	chromosome 10 open reading frame 10 [Source:HGNC Symbol;Acc:23355]	319	294	51	52	14.3559	15.9882	2.49046	2.71496
ENSG00000138061	41.7856	268.868	-2.4023	4.3944e-20	8.9289e-19	CYP1B1	protein_coding	cytochrome P450, family 1, subfamily B, polypeptide 1 [Source:HGNC Symbol;Acc:2597]	325	213	35	50	11.0943	8.78629	1.29644	1.98018
ENSG00000103528	8.67365	95.3149	-2.3998	3.9159e-10	3.8376e-09	SYT17	protein_coding	synaptotagmin XVII [Source:HGNC Symbol;Acc:24119]	75	109	14	4	2.44139	4.28758	0.494507	0.151062
ENSG00000261115	61.1142	377.427	-2.3998	3.289e-24	8.1713e-23	TMEM178B	protein_coding	transmembrane protein 178B [Source:HGNC Symbol;Acc:44112]	419	330	83	43	4.10215	3.90411	0.881748	0.488411
ENSG00000115596	7.27233	79.748	-2.3987	3.7047e-10	3.6535e-09	WNT6	protein_coding	wingless-type MMTV integration site family, member 6 [Source:HGNC Symbol;Acc:12785]	81	76	10	5	4.14231	4.69658	0.554915	0.296652
ENSG00000151834	6.76979	77.4315	-2.3982	5.6414e-10	5.4515e-09	GABRA2	protein_coding	gamma-aminobutyric acid (GABA) A receptor, alpha 2 [Source:HGNC Symbol;Acc:4076]	82	71	10	4	2.2897	2.39571	0.302994	0.129582
ENSG00000101846	0	37.7873	-2.3977	1.9121e-08	1.5564e-07	STS	protein_coding	steroid sulfatase (microsomal), isozyme S [Source:HGNC Symbol;Acc:11425]	48	28	0	0	0.39751	0.280205	0	0
ENSG00000145287	55.748	337.316	-2.3924	1.6275e-25	4.3142e-24	PLAC8	protein_coding	placenta-specific 8 [Source:HGNC Symbol;Acc:19254]	396	277	58	56	20.1559	17.0371	3.20334	3.30685
ENSG00000159388	32.078	213.305	-2.3902	9.4541e-18	1.6806e-16	BTG2	protein_coding	BTG family, member 2 [Source:HGNC Symbol;Acc:1131]	235	188	41	25	6.3645	6.15269	1.2049	0.785518
ENSG00000197696	1.48104	45.4786	-2.3706	1.9066e-08	1.5527e-07	NMB	protein_coding	neuromedin B [Source:HGNC Symbol;Acc:7842]	43	46	1	2	2.29461	2.96626	0.0579042	0.12382
ENSG00000151743	0	36.4001	-2.3672	2.8975e-08	2.3109e-07	AMN1	protein_coding	antagonist of mitotic exit network 1 homolog (S. cerevisiae) [Source:HGNC Symbol;Acc:27281]	39	33	0	0	2.46909	2.52463	0	0
ENSG00000064201	0	36.9577	-2.3651	2.9818e-08	2.3736e-07	TSPAN32	protein_coding	tetraspanin 32 [Source:HGNC Symbol;Acc:13410]	33	39	0	0	1.63647	2.33706	0	0
ENSG00000167107	39.0604	243.036	-2.3644	4.0414e-20	8.242e-19	ACSF2	protein_coding	acyl-CoA synthetase family member 2 [Source:HGNC Symbol;Acc:26101]	268	214	43	37	16.1528	15.5861	2.81223	2.58723
ENSG00000239713	161.458	893.236	-2.3595	1.038e-40	5.2124e-39	APOBEC3G	protein_coding	apolipoprotein B mRNA editing enzyme, catalytic polypeptide-like 3G [Source:HGNC Symbol;Acc:17357]	964	804	127	201	35.6327	35.9119	5.09382	8.6196
ENSG00000139970	68.3091	392.536	-2.348	5.424e-28	1.6041e-26	RTN1	protein_coding	reticulon 1 [Source:HGNC Symbol;Acc:10467]	394	378	77	63	11.8934	13.7884	2.52215	2.20634
ENSG00000162692	31.0221	202.555	-2.3411	7.401e-16	1.1693e-14	VCAM1	protein_coding	vascular cell adhesion molecule 1 [Source:HGNC Symbol;Acc:12663]	243	162	24	39	4.45749	3.59095	0.47771	0.829981
ENSG00000179163	53.158	314.261	-2.3336	1.116e-21	2.447e-20	FUCA1	protein_coding	fucosidase, alpha-L- 1, tissue [Source:HGNC Symbol;Acc:4006]	345	278	42	66	9.1017	8.86256	1.20233	2.02008
ENSG00000164638	11.6357	100.211	-2.3259	1.3959e-10	1.441e-09	SLC29A4	protein_coding	solute carrier family 29 (nucleoside transporters), member 4 [Source:HGNC Symbol;Acc:23097]	124	77	16	8	3.83969	2.88122	0.537606	0.287399
ENSG00000061656	24.3297	162.735	-2.3216	1.7041e-14	2.4375e-13	SPAG4	protein_coding	sperm associated antigen 4 [Source:HGNC Symbol;Acc:11214]	175	147	30	20	11.1184	11.2858	2.0682	1.47419
ENSG00000142224	2.96208	51.9618	-2.3188	2.1849e-08	1.7706e-07	IL19	protein_coding	interleukin 19 [Source:HGNC Symbol;Acc:5990]	51	51	2	4	2.37634	2.87157	0.10112	0.216231
ENSG00000102271	0.951928	43.0726	-2.3153	5.1549e-08	3.9704e-07	KLHL4	protein_coding	kelch-like family member 4 [Source:HGNC Symbol;Acc:6355]	33	50	2	0	0.431296	0.789663	0.0283635	0
ENSG00000151023	9.78502	86.3224	-2.3073	3.9381e-10	3.8571e-09	ENKUR	protein_coding	enkurin, TRPC channel interacting protein [Source:HGNC Symbol;Acc:28388]	94	77	10	10	2.82489	2.79624	0.326094	0.348653
ENSG00000158813	7.69515	80.2093	-2.3031	3.0083e-09	2.6687e-08	EDA	protein_coding	ectodysplasin A [Source:HGNC Symbol;Acc:3157]	88	71	13	3	2.91374	2.84077	0.467068	0.115241
ENSG00000114541	68.0458	376.411	-2.3026	2.3359e-27	6.648e-26	FRMD4B	protein_coding	FERM domain containing 4B [Source:HGNC Symbol;Acc:24886]	406	339	68	71	16.6227	16.7721	3.02103	3.37252
ENSG00000124762	432.128	2164.82	-2.2931	7.7139e-117	2.2895e-114	CDKN1A	protein_coding	cyclin-dependent kinase inhibitor 1A (p21, Cip1) [Source:HGNC Symbol;Acc:1784]	2349	1938	437	446	111.178	110.841	22.4433	24.4901
ENSG00000183762	227.539	1159.79	-2.2927	4.9521e-69	5.6376e-67	KREMEN1	protein_coding	kringle containing transmembrane protein 1 [Source:HGNC Symbol;Acc:17550]	1278	1022	250	216	26.7609	25.8602	5.6804	5.2474
ENSG00000103313	3.91401	55.6672	-2.2877	2.1737e-08	1.7624e-07	MEFV	protein_coding	Mediterranean fever [Source:HGNC Symbol;Acc:6998]	53	56	4	4	1.27719	1.63072	0.104594	0.11183
ENSG00000180921	151.455	781.623	-2.2874	6.0169e-50	4.202e-48	FAM83H	protein_coding	family with sequence similarity 83, member H [Source:HGNC Symbol;Acc:24797]	861	689	163	147	10.036	9.70486	2.06165	1.98791
ENSG00000119917	142.888	739.111	-2.2872	1.3348e-47	8.3402e-46	IFIT3	protein_coding	interferon-induced protein with tetratricopeptide repeats 3 [Source:HGNC Symbol;Acc:5411]	810	655	145	147	17.6667	17.2633	3.43169	3.7197
ENSG00000103742	0.978502	39.5496	-2.2844	7.6467e-08	5.7588e-07	IGDCC4	protein_coding	immunoglobulin superfamily, DCC subclass, member 4 [Source:HGNC Symbol;Acc:13770]	41	37	1	1	0.779353	0.84989	0.0206262	0.0220531
ENSG00000115884	1018.32	5015.89	-2.2836	2.3652e-222	3.024e-219	SDC1	protein_coding	syndecan 1 [Source:HGNC Symbol;Acc:10658]	5395	4530	1090	994	169.784	172.271	37.222	36.292
ENSG00000116661	3.49119	58.2642	-2.2744	4.4465e-08	3.4681e-07	FBXO2	protein_coding	F-box protein 2 [Source:HGNC Symbol;Acc:13581]	43	69	1	6	3.1128	6.03591	0.078551	0.503911
ENSG00000104321	271.335	1351.99	-2.27	1.1111e-79	1.6342e-77	TRPA1	protein_coding	transient receptor potential cation channel, subfamily A, member 1 [Source:HGNC Symbol;Acc:497]	1465	1212	285	270	46.5931	46.5798	9.83553	9.96248
ENSG00000170373	8.93939	85.4929	-2.269	3.7228e-09	3.2653e-08	CST1	protein_coding	cystatin SN [Source:HGNC Symbol;Acc:2473]	79	88	4	14	6.02581	8.11114	0.331068	1.2389
ENSG00000197457	110.254	571.832	-2.2648	3.5666e-36	1.5278e-34	STMN3	protein_coding	stathmin-like 3 [Source:HGNC Symbol;Acc:15926]	648	489	106	119	21.6951	19.7837	3.8509	4.62226
ENSG00000111335	78.9953	420.501	-2.2619	6.0991e-28	1.7942e-26	OAS2	protein_coding	2'-5'-oligoadenylate synthetase 2, 69/71kDa [Source:HGNC Symbol;Acc:8087]	446	385	72	89	11.5022	11.9982	2.01487	2.6629
ENSG00000072133	0	33.3435	-2.2471	1.3942e-07	1.0155e-06	RPS6KA6	protein_coding	ribosomal protein S6 kinase, 90kDa, polypeptide 6 [Source:HGNC Symbol;Acc:10435]	36	30	0	0	1.24623	1.25496	0	0
ENSG00000155307	11.1863	90.5803	-2.2433	8.2991e-10	7.8688e-09	SAMSN1	protein_coding	SAM domain, SH3 domain and nuclear localization signals 1 [Source:HGNC Symbol;Acc:10528]	108	73	14	9	4.37209	3.57108	0.614982	0.422696
ENSG00000130600	4.83936	60.0214	-2.2401	3.2672e-08	2.5933e-07	H19	processed_transcript	H19, imprinted maternally expressed transcript (non-protein coding) [Source:HGNC Symbol;Acc:4713]	54	63	7	3	1.95717	2.75922	0.275298	0.126147
ENSG00000073282	537.674	2585.79	-2.2396	1.458e-131	5.6358e-129	TP63	protein_coding	tumor protein p63 [Source:HGNC Symbol;Acc:15979]	2784	2333	550	549	66.0569	66.8921	14.1606	15.1127
ENSG00000023171	300.847	1464.98	-2.2395	1.7642e-81	2.618e-79	GRAMD1B	protein_coding	GRAM domain containing 1B [Source:HGNC Symbol;Acc:29214]	1613	1292	328	288	25.4924	24.6746	5.62496	5.28067
ENSG00000149294	33.7716	197.19	-2.2384	4.5048e-16	7.2272e-15	NCAM1	protein_coding	neural cell adhesion molecule 1 [Source:HGNC Symbol;Acc:7656]	211	179	34	35	6.59036	6.75601	1.15232	1.26828
ENSG00000159784	5.4482	62.4257	-2.2375	2.5742e-08	2.067e-07	FAM131B	protein_coding	family with sequence similarity 131, member B [Source:HGNC Symbol;Acc:22202]	70	54	3	8	1.17253	1.09303	0.0545276	0.155466
ENSG00000165118	0.951928	39.7372	-2.2295	1.64e-07	1.1819e-06	C9orf64	protein_coding	chromosome 9 open reading frame 64 [Source:HGNC Symbol;Acc:28144]	33	44	2	0	1.04217	1.67915	0.0685369	0
ENSG00000152784	53.8442	290.467	-2.2175	2.2868e-20	4.7099e-19	PRDM8	protein_coding	PR domain containing 8 [Source:HGNC Symbol;Acc:13993]	284	286	54	56	9.06977	11.0371	1.87129	2.07485
ENSG00000265992	5.87101	65.3962	-2.2171	3.2837e-08	2.6052e-07	ESRG	sense_intronic	embryonic stem cell related (non-protein coding) [Source:HGNC Symbol;Acc:39079]	50	76	6	6	0.859927	1.57949	0.111973	0.119719
ENSG00000115165	329.069	1572.98	-2.2164	1.5274e-83	2.329e-81	CYTIP	protein_coding	cytohesin 1 interacting protein [Source:HGNC Symbol;Acc:9506]	1695	1418	325	347	100.699	101.799	20.9513	23.917
ENSG00000263711	1.90386	44.6422	-2.2161	1.5827e-07	1.1442e-06	RP11-169F17.1	protein_coding	Protein LOC400655 [Source:UniProtKB/TrEMBL;Acc:J3KRU9]	52	37	4	0	1.79093	1.53988	0.149487	0
ENSG00000160179	112.501	562.938	-2.2158	5.5768e-35	2.2738e-33	ABCG1	protein_coding	ATP-binding cassette, sub-family G (WHITE), member 1 [Source:HGNC Symbol;Acc:73]	648	473	116	114	13.4697	11.881	2.61643	2.74921
ENSG00000141682	98.1159	495.895	-2.2135	7.6757e-31	2.5878e-29	PMAIP1	protein_coding	phorbol-12-myristate-13-acetate-induced protein 1 [Source:HGNC Symbol;Acc:9108]	526	454	90	110	21.2301	22.1428	3.94164	5.15084
ENSG00000154102	3.49119	52.7913	-2.2041	1.1561e-07	8.5015e-07	C16orf74	protein_coding	chromosome 16 open reading frame 74 [Source:HGNC Symbol;Acc:23362]	66	40	1	6	3.98683	2.91981	0.065547	0.42049
ENSG00000151702	6.45327	66.8712	-2.2002	3.3557e-08	2.6561e-07	FLI1	protein_coding	Friend leukemia virus integration 1 [Source:HGNC Symbol;Acc:3749]	76	57	3	10	1.49572	1.35557	0.064066	0.228327
ENSG00000178184	32.264	184.501	-2.1965	5.6561e-15	8.349e-14	PARD6G	protein_coding	par-6 partitioning defective 6 homolog gamma (C. elegans) [Source:HGNC Symbol;Acc:16076]	198	167	34	32	6.43362	6.55719	1.19878	1.20631
ENSG00000087266	303.572	1429.59	-2.193	9.8147e-79	1.4063e-76	SH3BP2	protein_coding	SH3-domain binding protein 2 [Source:HGNC Symbol;Acc:10825]	1575	1260	320	301	44.1617	42.692	9.73608	9.79156
ENSG00000215788	8.85967	75.6709	-2.1898	8.8641e-09	7.4977e-08	TNFRSF25	protein_coding	tumor necrosis factor receptor superfamily, member 25 [Source:HGNC Symbol;Acc:11910]	83	67	7	11	3.72592	3.63447	0.340975	0.572886
ENSG00000270321	0	32.0476	-2.1893	2.8557e-07	1.9951e-06	RP11-2L8.2	lincRNA	-	32	31	0	0	8.95394	10.4818	0	0
ENSG00000180190	0	32.2334	-2.188	2.8989e-07	2.0228e-06	C8orf42	protein_coding	chromosome 8 open reading frame 42 [Source:HGNC Symbol;Acc:26951]	30	33	0	0	0.755293	1.00397	0	0
ENSG00000131080	0.475964	34.4553	-2.1845	3.0637e-07	2.1324e-06	EDA2R	protein_coding	ectodysplasin A2 receptor [Source:HGNC Symbol;Acc:17756]	36	32	1	0	1.09466	1.17582	0.032995	0
ENSG00000171130	46.4921	247.569	-2.1753	9.0048e-18	1.6042e-16	ATP6V0E2	protein_coding	ATPase, H+ transporting V0 subunit e2 [Source:HGNC Symbol;Acc:21723]	291	203	47	48	11.2895	9.51676	1.97856	2.16045
ENSG00000138646	20.0726	125.779	-2.1719	1.8805e-11	2.1005e-10	HERC5	protein_coding	HECT and RLD domain containing E3 ubiquitin protein ligase 5 [Source:HGNC Symbol;Acc:24368]	136	113	20	21	3.28612	3.29939	0.524376	0.588685
ENSG00000115226	0.475964	34.1782	-2.1664	3.8418e-07	2.6245e-06	FNDC4	protein_coding	fibronectin type III domain containing 4 [Source:HGNC Symbol;Acc:20239]	33	34	1	0	1.31716	1.63989	0.0433105	0
ENSG00000176907	13.8319	99.7552	-2.1637	1.7922e-09	1.6367e-08	C8orf4	protein_coding	chromosome 8 open reading frame 4 [Source:HGNC Symbol;Acc:1357]	99	97	9	19	2.91672	3.45336	0.28772	0.64943
ENSG00000123191	23.5106	140.69	-2.1634	3.4598e-12	4.1134e-11	ATP7B	protein_coding	ATPase, Cu++ transporting, beta polypeptide [Source:HGNC Symbol;Acc:870]	155	124	23	25	2.38885	2.30935	0.38464	0.44701
ENSG00000006757	2.45954	42.9762	-2.1463	3.3356e-07	2.3024e-06	PNPLA4	protein_coding	patatin-like phospholipase domain containing 4 [Source:HGNC Symbol;Acc:24887]	46	39	2	3	1.06434	1.09043	0.0502134	0.0805308
ENSG00000173227	122.893	583.147	-2.1441	3.3979e-34	1.3257e-32	SYT12	protein_coding	synaptotagmin XII [Source:HGNC Symbol;Acc:18381]	610	541	141	111	14.8388	15.9029	3.72183	3.13265
ENSG00000165949	33.2956	182.09	-2.14	3.3727e-14	4.691e-13	IFI27	protein_coding	interferon, alpha-inducible protein 27 [Source:HGNC Symbol;Acc:5397]	206	156	33	35	16.3358	14.9489	2.8396	3.22005
ENSG00000103811	16.9511	113.372	-2.1394	7.0848e-10	6.7754e-09	CTSH	protein_coding	cathepsin H [Source:HGNC Symbol;Acc:2535]	108	114	24	11	6.24451	7.96508	1.50576	0.737883
ENSG00000160183	0.951928	36.1213	-2.1353	5.4797e-07	3.6475e-06	TMPRSS3	protein_coding	transmembrane protease, serine 3 [Source:HGNC Symbol;Acc:11877]	42	30	2	0	0.976807	0.843124	0.0504729	0
ENSG00000139508	67.0407	330.1	-2.134	3.0357e-22	6.9309e-21	SLC46A3	protein_coding	solute carrier family 46, member 3 [Source:HGNC Symbol;Acc:27501]	360	294	68	69	7.8487	7.74557	1.60869	1.74528
ENSG00000128422	22.3993	133.465	-2.1315	2.0147e-11	2.2459e-10	KRT17	protein_coding	keratin 17 [Source:HGNC Symbol;Acc:6427]	149	116	27	19	8.07883	7.6003	1.58853	1.19519
ENSG00000130702	829.63	3685.35	-2.1304	8.1497e-144	3.7627e-141	LAMA5	protein_coding	laminin, alpha 5 [Source:HGNC Symbol;Acc:6485]	4112	3205	910	789	133.772	125.995	32.1236	29.779
ENSG00000116574	131.805	614.544	-2.1287	2.0819e-36	9.1061e-35	RHOU	protein_coding	ras homolog family member U [Source:HGNC Symbol;Acc:17794]	649	565	146	124	20.5803	21.6504	5.02376	4.56193
ENSG00000187134	1759.04	7747.77	-2.1259	1.1865e-233	2.1911e-230	AKR1C1	protein_coding	aldo-keto reductase family 1, member C1 [Source:HGNC Symbol;Acc:384]	8228	7085	1923	1679	194.886	202.786	49.4237	46.1379
ENSG00000148344	90.3653	430.781	-2.1257	1.9907e-27	5.7144e-26	PTGES	protein_coding	prostaglandin E synthase [Source:HGNC Symbol;Acc:9599]	461	391	98	87	13.6714	14.012	3.1536	2.9933
ENSG00000127533	8.80652	71.876	-2.1248	2.8741e-08	2.2933e-07	F2RL3	protein_coding	coagulation factor II (thrombin) receptor-like 3 [Source:HGNC Symbol;Acc:3540]	70	71	9	9	1.85034	2.26789	0.258146	0.276004
ENSG00000119684	48.4757	247.488	-2.1242	2.3143e-17	4.0279e-16	MLH3	protein_coding	mutL homolog 3 (E. coli) [Source:HGNC Symbol;Acc:7128]	250	237	48	51	5.20666	5.96456	1.08475	1.23228
ENSG00000213626	28.4297	157.178	-2.1107	1.2786e-12	1.5753e-11	LBH	protein_coding	limb bud and heart development [Source:HGNC Symbol;Acc:29532]	169	142	27	31	9.63736	9.78522	1.67072	2.05094
ENSG00000102174	59.7949	293.232	-2.1047	3.2811e-19	6.2828e-18	PHEX	protein_coding	phosphate regulating endopeptidase homolog, X-linked [Source:HGNC Symbol;Acc:8918]	338	246	57	65	6.5541	5.76424	1.19933	1.46228
ENSG00000112299	7.77487	66.5029	-2.1042	6.9542e-08	5.2587e-07	VNN1	protein_coding	vanin 1 [Source:HGNC Symbol;Acc:12705]	68	63	10	6	1.1823	1.32364	0.188664	0.12103
ENSG00000103888	1424.59	6179.78	-2.1042	6.1078e-225	9.2288e-222	KIAA1199	protein_coding	KIAA1199 [Source:HGNC Symbol;Acc:29213]	6587	5631	1498	1416	91.2104	94.2222	22.508	22.7478
ENSG00000075651	169.281	764.121	-2.1036	9.5884e-44	5.2771e-42	PLD1	protein_coding	phospholipase D1, phosphatidylcholine-specific [Source:HGNC Symbol;Acc:9067]	828	685	173	173	24.5282	24.5209	5.56096	5.94567
ENSG00000178462	11.2661	80.951	-2.0979	1.3281e-08	1.0988e-07	TUBAL3	protein_coding	tubulin, alpha-like 3 [Source:HGNC Symbol;Acc:23534]	86	74	11	12	2.81132	2.92317	0.390187	0.455106
ENSG00000141540	6.3204	59.1833	-2.0899	1.7015e-07	1.2227e-06	TTYH2	protein_coding	tweety homolog 2 (Drosophila) [Source:HGNC Symbol;Acc:13877]	69	49	8	5	2.63152	2.25821	0.331068	0.221232
ENSG00000163347	556.84	2392.77	-2.0751	3.6824e-102	7.8467e-100	CLDN1	protein_coding	claudin 1 [Source:HGNC Symbol;Acc:2032]	2588	2149	623	518	71.4159	71.6602	18.6547	16.5837
ENSG00000186832	3.46462	45.9398	-2.0745	6.673e-07	4.3861e-06	KRT16	protein_coding	keratin 16 [Source:HGNC Symbol;Acc:6423]	50	41	2	5	2.66552	2.64123	0.115694	0.309245
ENSG00000071242	0.951928	34.2694	-2.0669	1.2665e-06	7.9951e-06	RPS6KA2	protein_coding	ribosomal protein S6 kinase, 90kDa, polypeptide 2 [Source:HGNC Symbol;Acc:10431]	38	30	2	0	1.04381	0.995795	0.0596125	0
ENSG00000170458	19.8334	121.143	-2.0577	2.1855e-09	1.9763e-08	CD14	protein_coding	CD14 molecule [Source:HGNC Symbol;Acc:1628]	150	93	29	12	7.42486	5.56276	1.55763	0.689125
ENSG00000135218	5.87101	55.1096	-2.053	3.4967e-07	2.4036e-06	CD36	protein_coding	CD36 molecule (thrombospondin receptor) [Source:HGNC Symbol;Acc:1663]	59	50	6	6	2.33251	2.38865	0.25739	0.275196
ENSG00000182272	91.5829	412.531	-2.0464	8.2834e-25	2.1445e-23	B4GALNT4	protein_coding	beta-1,4-N-acetyl-galactosaminyl transferase 4 [Source:HGNC Symbol;Acc:26315]	454	364	90	97	21.9888	21.3039	4.72997	5.45053
ENSG00000164116	2.40639	40.3826	-2.0417	1.3742e-06	8.6156e-06	GUCY1A3	protein_coding	guanylate cyclase 1, soluble, alpha 3 [Source:HGNC Symbol;Acc:4685]	44	36	4	1	0.91215	0.901835	0.0899793	0.024051
ENSG00000006210	0	28.8034	-2.0324	1.7726e-06	1.0892e-05	CX3CL1	protein_coding	chemokine (C-X3-C motif) ligand 1 [Source:HGNC Symbol;Acc:10647]	37	21	0	0	0.615187	0.421925	0	0
ENSG00000269011	24.4626	132.171	-2.0323	8.8337e-11	9.2575e-10	AL050303.1	protein_coding	Uncharacterized protein; cDNA FLJ43689 fis, clone TBAES2003550 [Source:UniProtKB/TrEMBL;Acc:Q6ZUI3]	139	122	25	25	4.08183	4.32923	0.796616	0.851726
ENSG00000173546	117.553	512.67	-2.0169	2.788e-27	7.9211e-26	CSPG4	protein_coding	chondroitin sulfate proteoglycan 4 [Source:HGNC Symbol;Acc:2466]	507	500	115	125	3.30274	3.93593	0.812894	0.944707
ENSG00000115457	19.4903	111.89	-2.0166	2.051e-09	1.8598e-08	IGFBP2	protein_coding	insulin-like growth factor binding protein 2, 36kDa [Source:HGNC Symbol;Acc:5471]	106	113	23	17	3.61159	4.65245	0.850333	0.671987
ENSG00000168079	10.2344	72.3389	-2.0109	1.1565e-07	8.5015e-07	SCARA5	protein_coding	scavenger receptor class A, member 5 (putative) [Source:HGNC Symbol;Acc:28701]	71	71	12	9	1.66779	2.01536	0.305867	0.24527
ENSG00000130592	1.98358	37.1401	-2.0085	2.2678e-06	1.3687e-05	LSP1	protein_coding	lymphocyte-specific protein 1 [Source:HGNC Symbol;Acc:6707]	43	31	1	3	2.14418	1.86795	0.0541081	0.173554
ENSG00000146938	3.46462	43.9933	-2.0078	1.6552e-06	1.0224e-05	NLGN4X	protein_coding	neuroligin 4, X-linked [Source:HGNC Symbol;Acc:14287]	53	35	2	5	0.869964	0.694232	0.0356225	0.0952172
ENSG00000164089	1.00508	33.3418	-2.0066	2.5746e-06	1.5382e-05	AGXT2L1	protein_coding	alanine-glyoxylate aminotransferase 2-like 1 [Source:HGNC Symbol;Acc:14404]	42	25	0	2	2.12373	1.52757	0	0.117328
ENSG00000086300	234.577	968.17	-1.9915	8.0946e-48	5.1416e-46	SNX10	protein_coding	sorting nexin 10 [Source:HGNC Symbol;Acc:14974]	1031	883	231	248	46.0907	47.7008	11.2056	12.8625
ENSG00000156269	1.957	36.3089	-1.9899	2.833e-06	1.6847e-05	NAA11	protein_coding	N(alpha)-acetyltransferase 11, NatA catalytic subunit [Source:HGNC Symbol;Acc:28125]	34	37	2	2	1.5162	1.99384	0.0967779	0.103473
ENSG00000157064	19.0144	106.605	-1.9891	3.6979e-09	3.2451e-08	NMNAT2	protein_coding	nicotinamide nucleotide adenylyltransferase 2 [Source:HGNC Symbol;Acc:16789]	121	91	22	17	1.96406	1.78493	0.38749	0.320138
ENSG00000121552	31.4449	156.617	-1.9761	5.238e-11	5.6095e-10	CSTA	protein_coding	cystatin A (stefin A) [Source:HGNC Symbol;Acc:2481]	187	126	27	37	12.8481	10.4612	2.01294	2.94931
ENSG00000010310	8.83309	64.4617	-1.9695	4.3203e-07	2.9214e-06	GIPR	protein_coding	gastric inhibitory polypeptide receptor [Source:HGNC Symbol;Acc:4271]	78	51	8	10	3.32723	2.62887	0.370294	0.494889
ENSG00000250771	11.2129	74.8413	-1.969	1.7945e-07	1.2845e-06	RP11-153M7.3	pseudogene	-	68	78	13	10	1.37898	1.91142	0.286064	0.235272
ENSG00000163637	72.7257	316.763	-1.9683	3.9713e-19	7.5958e-18	PRICKLE2	protein_coding	prickle homolog 2 (Drosophila) [Source:HGNC Symbol;Acc:20340]	342	285	81	68	5.41459	5.4525	1.39153	1.24902
ENSG00000198753	54.2139	243.591	-1.9681	1.039e-15	1.6215e-14	PLXNB3	protein_coding	plexin B3 [Source:HGNC Symbol;Acc:9105]	268	215	59	52	6.60864	6.40659	1.5787	1.48765
ENSG00000105808	10.1281	72.7985	-1.9668	3.9267e-07	2.6781e-06	RASA4	protein_coding	RAS p21 protein activator 4 [Source:HGNC Symbol;Acc:23181]	84	61	16	5	2.75595	2.41842	0.569614	0.190319
ENSG00000161682	23.5638	123.368	-1.9666	1.1466e-09	1.0671e-08	FAM171A2	protein_coding	family with sequence similarity 171, member A2 [Source:HGNC Symbol;Acc:30480]	144	102	21	27	5.22965	4.47632	0.827559	1.13761
ENSG00000186918	363.631	1455.18	-1.9642	1.7e-67	1.8838e-65	ZNF395	protein_coding	zinc finger protein 395 [Source:HGNC Symbol;Acc:18737]	1533	1341	386	358	70.0993	74.0988	19.1526	18.9922
ENSG00000162654	102.028	429.759	-1.9611	3.142e-24	7.8179e-23	GBP4	protein_coding	guanylate binding protein 4 [Source:HGNC Symbol;Acc:20480]	472	380	113	96	10.3997	10.1175	2.70163	2.45397
ENSG00000204580	666.669	2633.68	-1.9577	1.3998e-99	2.8373e-97	DDR1	protein_coding	discoidin domain receptor tyrosine kinase 1 [Source:HGNC Symbol;Acc:2730]	2837	2375	745	621	117.221	118.582	33.4019	29.7685
ENSG00000134184	0	26.7674	-1.9568	4.0406e-06	2.3515e-05	GSTM1	protein_coding	glutathione S-transferase mu 1 [Source:HGNC Symbol;Acc:4632]	29	24	0	0	1.896	1.89611	0	0
ENSG00000204103	0	26.7674	-1.9568	4.0406e-06	2.3515e-05	MAFB	protein_coding	v-maf musculoaponeurotic fibrosarcoma oncogene homolog B (avian) [Source:HGNC Symbol;Acc:6408]	29	24	0	0	0.601652	0.601685	0	0
ENSG00000165929	31.7349	155.331	-1.9555	5.5678e-11	5.9293e-10	TC2N	protein_coding	tandem C2 domains, nuclear [Source:HGNC Symbol;Acc:19859]	147	157	35	30	3.16527	4.08512	0.81777	0.749437
ENSG00000141753	5286.76	20600.8	-1.9531	6.3799e-253	1.3255e-249	IGFBP4	protein_coding	insulin-like growth factor binding protein 4 [Source:HGNC Symbol;Acc:5473]	22486	18332	5860	4970	716.837	706.202	202.71	183.816
ENSG00000188559	348.424	1381.63	-1.9503	1.2224e-64	1.2465e-62	RALGAPA2	protein_coding	Ral GTPase activating protein, alpha subunit 2 (catalytic) [Source:HGNC Symbol;Acc:16207]	1475	1257	372	341	26.0822	26.8595	7.1378	6.99563
ENSG00000183578	59.0798	263.148	-1.9491	3.9414e-15	5.9018e-14	TNFAIP8L3	protein_coding	tumor necrosis factor, alpha-induced protein 8-like 3 [Source:HGNC Symbol;Acc:20620]	243	271	65	56	5.80143	7.81824	1.68388	1.55109
ENSG00000163435	7.2989	56.9614	-1.9451	1.0548e-06	6.7505e-06	ELF3	protein_coding	E74-like factor 3 (ets domain transcription factor, epithelial-specific ) [Source:HGNC Symbol;Acc:3318]	63	50	9	6	2.2383	2.14664	0.346968	0.247314
ENSG00000151632	1099.24	4263.76	-1.9364	3.04e-119	9.5336e-117	AKR1C2	protein_coding	aldo-keto reductase family 1, member C2 [Source:HGNC Symbol;Acc:385]	4743	3720	1241	1012	207.904	197.045	59.0271	51.4649
ENSG00000175426	50.2201	224.519	-1.9352	6.2938e-14	8.624e-13	PCSK1	protein_coding	proprotein convertase subtilisin/kexin type 1 [Source:HGNC Symbol;Acc:8743]	222	219	58	45	5.11903	6.10224	1.45121	1.20384
ENSG00000215182	0.475964	28.621	-1.9305	5.8662e-06	3.3119e-05	MUC5AC	protein_coding	mucin 5AC, oligomeric mucus/gel-forming [Source:HGNC Symbol;Acc:7515]	27	29	1	0	0.561669	0.728997	0.0225728	0
ENSG00000125657	51.7809	226.271	-1.9206	2.2762e-14	3.2107e-13	TNFSF9	protein_coding	tumor necrosis factor (ligand) superfamily, member 9 [Source:HGNC Symbol;Acc:11939]	251	198	56	50	8.18037	7.79785	1.98041	1.89055
ENSG00000061337	5.89759	50.2924	-1.9205	2.4504e-06	1.4719e-05	LZTS1	protein_coding	leucine zipper, putative tumor suppressor 1 [Source:HGNC Symbol;Acc:13861]	57	43	5	7	0.722581	0.658705	0.0687782	0.102951
ENSG00000166532	12.3774	78.6345	-1.9199	4.0212e-07	2.7347e-06	RIMKLB	protein_coding	ribosomal modification protein rimK-like family member B [Source:HGNC Symbol;Acc:29228]	87	69	7	18	2.5138	2.4092	0.219472	0.603399
ENSG00000238129	0.951928	30.564	-1.9113	7.4859e-06	4.1641e-05	RP3-410C9.2	lincRNA	-	36	25	2	0	3.10563	2.60614	0.187217	0
ENSG00000171631	5.3419	48.6229	-1.9062	3.7483e-06	2.1914e-05	P2RY6	protein_coding	pyrimidinergic receptor P2Y, G-protein coupled, 6 [Source:HGNC Symbol;Acc:8543]	63	35	7	4	2.2849	1.53393	0.275482	0.168309
ENSG00000088881	7.88116	57.982	-1.9037	1.7075e-06	1.0523e-05	EBF4	protein_coding	early B-cell factor 4 [Source:HGNC Symbol;Acc:29278]	58	56	6	10	2.23091	2.60287	0.250423	0.446246
ENSG00000170873	105.782	428.094	-1.9029	1.8896e-22	4.3561e-21	MTSS1	protein_coding	metastasis suppressor 1 [Source:HGNC Symbol;Acc:20443]	460	387	123	94	13.9795	14.212	4.0561	3.31422
ENSG00000172572	5.39505	47.3304	-1.8934	4.0841e-06	2.3751e-05	PDE3A	protein_coding	phosphodiesterase 3A, cGMP-inhibited [Source:HGNC Symbol;Acc:8778]	47	46	5	6	0.678109	0.801993	0.0782782	0.100432
ENSG00000138378	6.84951	52.6089	-1.8892	2.7062e-06	1.6128e-05	STAT4	protein_coding	signal transducer and activator of transcription 4 [Source:HGNC Symbol;Acc:11365]	56	48	7	7	2.54562	2.63668	0.345281	0.369167
ENSG00000185033	611.453	2297.08	-1.8859	2.4947e-90	4.4112e-88	SEMA4B	protein_coding	sema domain, immunoglobulin domain (Ig), transmembrane domain (TM) and short cytoplasmic domain, (semaphorin) 4B [Source:HGNC Symbol;Acc:10730]	2499	2051	667	585	104.697	103.835	30.3224	28.4344
ENSG00000126870	182.794	706.89	-1.8848	1.3933e-34	5.5668e-33	WDR60	protein_coding	WD repeat domain 60 [Source:HGNC Symbol;Acc:21862]	738	657	194	180	15.0793	16.2219	4.30125	4.26694
ENSG00000027075	91.3969	367.615	-1.8845	2.4283e-20	4.9889e-19	PRKCH	protein_coding	protein kinase C, eta [Source:HGNC Symbol;Acc:9403]	387	339	97	90	24.8211	26.2736	6.75072	6.69687
ENSG00000185585	483.09	1817.41	-1.8835	1.8157e-74	2.3394e-72	OLFML2A	protein_coding	olfactomedin-like 2A [Source:HGNC Symbol;Acc:27270]	1936	1657	486	501	23.3112	24.1097	6.34986	6.99869
ENSG00000105088	9.25591	62.1503	-1.8834	1.3685e-06	8.5835e-06	OLFM2	protein_coding	olfactomedin 2 [Source:HGNC Symbol;Acc:17189]	61	61	11	8	2.65021	3.20251	0.518576	0.403237
ENSG00000185885	171.634	665.216	-1.8812	1.1991e-31	4.2135e-30	IFITM1	protein_coding	interferon induced transmembrane protein 1 [Source:HGNC Symbol;Acc:5412]	672	637	179	172	57.8793	66.2986	16.7292	17.1871
ENSG00000159164	183.035	709.673	-1.8795	4.9474e-30	1.5967e-28	SV2A	protein_coding	synaptic vesicle glycoprotein 2A [Source:HGNC Symbol;Acc:20566]	726	672	166	207	10.7122	11.9818	2.65777	3.54349
ENSG00000111199	2.51269	38.7132	-1.8762	1.0444e-05	5.6694e-05	TRPV4	protein_coding	transient receptor potential cation channel, subfamily V, member 4 [Source:HGNC Symbol;Acc:18083]	50	28	0	5	1.05065	0.71098	0	0.121893
ENSG00000165475	14.0156	83.1763	-1.8749	5.0735e-07	3.403e-06	CRYL1	protein_coding	crystallin, lambda 1 [Source:HGNC Symbol;Acc:18246]	80	83	21	8	3.53541	4.4324	1.00702	0.410167
ENSG00000154864	19.5169	100.497	-1.8738	4.1504e-08	3.2508e-07	PIEZO2	protein_coding	piezo-type mechanosensitive ion channel component 2 [Source:HGNC Symbol;Acc:26270]	97	100	22	18	1.56415	1.94858	0.384944	0.336743
ENSG00000132122	26.0765	125.59	-1.869	7.576e-09	6.4641e-08	SPATA6	protein_coding	spermatogenesis associated 6 [Source:HGNC Symbol;Acc:18309]	150	101	21	32	6.03166	4.9077	0.916292	1.49285
ENSG00000243244	17.613	92.3409	-1.869	8.3934e-08	6.2869e-07	STON1	protein_coding	stonin 1 [Source:HGNC Symbol;Acc:17003]	107	77	18	18	1.43206	1.24532	0.261408	0.279493
ENSG00000139832	25.917	123.375	-1.8653	4.6007e-09	4.0057e-08	RAB20	protein_coding	RAB20, member RAS oncogene family [Source:HGNC Symbol;Acc:18260]	120	122	27	26	4.28033	5.25855	1.04503	1.07594
ENSG00000149177	105.995	416.324	-1.8649	9.6648e-22	2.1248e-20	PTPRJ	protein_coding	protein tyrosine phosphatase, receptor type, J [Source:HGNC Symbol;Acc:9673]	473	355	115	102	14.4887	13.1404	3.8224	3.62484
ENSG00000164938	19.9131	101.977	-1.8624	5.565e-08	4.2743e-07	TP53INP1	protein_coding	tumor protein p53 inducible nuclear protein 1 [Source:HGNC Symbol;Acc:18022]	105	96	26	15	1.43445	1.58481	0.385422	0.237742
ENSG00000250041	5.3419	46.4974	-1.859	6.6463e-06	3.7207e-05	CTD-2003C8.2	processed_transcript	-	44	47	7	4	4.81002	6.20874	0.830351	0.507311
ENSG00000121753	158.384	604.064	-1.8566	2.5018e-29	7.8755e-28	BAI2	protein_coding	brain-specific angiogenesis inhibitor 2 [Source:HGNC Symbol;Acc:944]	684	517	167	157	12.9291	11.809	3.42529	3.44295
ENSG00000170099	16.6345	87.713	-1.8547	1.5067e-07	1.0926e-06	SERPINA6	protein_coding	serpin peptidase inhibitor, clade A (alpha-1 antiproteinase, antitrypsin), member 6 [Source:HGNC Symbol;Acc:1540]	91	82	17	17	3.81843	4.15784	0.774035	0.827584
ENSG00000139679	45.0377	190.334	-1.8469	5.5513e-12	6.484e-11	LPAR6	protein_coding	lysophosphatidic acid receptor 6 [Source:HGNC Symbol;Acc:15520]	213	165	45	47	10.9238	10.2256	2.50423	2.79648
ENSG00000204528	12.218	70.8554	-1.8453	8.4918e-07	5.5091e-06	PSORS1C3	sense_intronic	psoriasis susceptibility 1 candidate 3 (non-protein coding) [Source:HGNC Symbol;Acc:17203]	75	65	13	12	6.83012	7.15305	1.28463	1.26785
ENSG00000197249	41.5199	178.751	-1.8448	4.7769e-11	5.139e-10	SERPINA1	protein_coding	serpin peptidase inhibitor, clade A (alpha-1 antiproteinase, antitrypsin), member 1 [Source:HGNC Symbol;Acc:8941]	218	140	45	40	7.85374	6.09479	1.75914	1.67186
ENSG00000110492	13.5396	78.5416	-1.8438	8.7314e-07	5.6468e-06	MDK	protein_coding	midkine (neurite growth-promoting factor 2) [Source:HGNC Symbol;Acc:6972]	88	68	20	8	5.80966	5.42485	1.43274	0.612743
ENSG00000197183	135.85	521.556	-1.8413	3.3032e-23	7.8656e-22	C20orf112	protein_coding	chromosome 20 open reading frame 112 [Source:HGNC Symbol;Acc:16106]	537	491	164	115	20.2654	22.391	6.71575	5.035
ENSG00000144452	2.37982	36.9577	-1.8376	1.6078e-05	8.462e-05	ABCA12	protein_coding	ATP-binding cassette, sub-family A (ABC1), member 12 [Source:HGNC Symbol;Acc:14637]	33	39	5	0	0.322263	0.460227	0.0529829	0
ENSG00000197635	28.35	128.646	-1.8284	4.8974e-09	4.2507e-08	DPP4	protein_coding	dipeptidyl-peptidase 4 [Source:HGNC Symbol;Acc:3009]	153	104	30	28	6.11586	5.02354	1.30124	1.29851
ENSG00000004799	7.7483	55.1113	-1.8275	5.4677e-06	3.1006e-05	PDK4	protein_coding	pyruvate dehydrogenase kinase, isozyme 4 [Source:HGNC Symbol;Acc:8812]	53	55	11	5	1.93521	2.42676	0.435828	0.211808
ENSG00000103044	184.062	682.805	-1.825	8.4167e-32	2.9828e-30	HAS3	protein_coding	hyaluronan synthase 3 [Source:HGNC Symbol;Acc:4820]	722	627	203	174	21.819	22.8968	6.65675	6.10051
ENSG00000167703	54.9798	226.355	-1.8182	7.1133e-12	8.2276e-11	SLC43A2	protein_coding	solute carrier family 43, member 2 [Source:HGNC Symbol;Acc:23087]	280	174	68	45	10.1756	7.64122	2.68152	1.8973
ENSG00000087494	6.79637	50.4799	-1.8165	7.8337e-06	4.3416e-05	PTHLH	protein_coding	parathyroid hormone-like hormone [Source:HGNC Symbol;Acc:9607]	49	50	9	5	2.22929	2.74885	0.444306	0.263913
ENSG00000166402	7.2989	51.7742	-1.8161	6.6286e-06	3.7121e-05	TUB	protein_coding	tubby homolog (mouse) [Source:HGNC Symbol;Acc:12406]	59	44	9	6	0.937394	0.844761	0.155161	0.110597
ENSG00000197358	45.5136	187.838	-1.8131	1.5627e-11	1.7609e-10	BNIP3P1	pseudogene	BCL2/adenovirus E1B 19kDa interacting protein 3 pseudogene 1 [Source:HGNC Symbol;Acc:19922]	192	178	46	47	8.36182	9.36765	2.17384	2.37475
ENSG00000105825	480.024	1718.02	-1.8108	1.6138e-63	1.5966e-61	TFPI2	protein_coding	tissue factor pathway inhibitor 2 [Source:HGNC Symbol;Acc:11761]	1875	1529	469	511	77.6507	76.5178	21.0759	24.5519
ENSG00000164742	24.9119	114.477	-1.8103	2.1445e-08	1.7396e-07	ADCY1	protein_coding	adenylate cyclase 1 (brain) [Source:HGNC Symbol;Acc:232]	132	96	27	24	1.42969	1.25647	0.317323	0.301579
ENSG00000268040	1.00508	28.4334	-1.8046	2.3004e-05	0.00011764	PRED62	protein_coding	Uncharacterized protein [Source:UniProtKB/TrEMBL;Acc:M0R1E6]	35	22	0	2	5.38496	4.09023	0	0.356997
ENSG00000082014	111.472	420.408	-1.8035	2.8665e-19	5.5079e-18	SMARCD3	protein_coding	SWI/SNF related, matrix associated, actin dependent regulator of chromatin, subfamily d, member 3 [Source:HGNC Symbol;Acc:11108]	447	384	98	129	19.6736	20.423	4.68028	6.58698
ENSG00000145242	0	23.6179	-1.7984	2.0091e-05	0.00010399	EPHA5	protein_coding	EPH receptor A5 [Source:HGNC Symbol;Acc:3389]	27	20	0	0	0.284063	0.254268	0	0
ENSG00000006740	11.6889	66.8729	-1.7981	2.2438e-06	1.3557e-05	ARHGAP44	protein_coding	Rho GTPase activating protein 44 [Source:HGNC Symbol;Acc:29096]	70	62	14	10	1.60112	1.71367	0.347474	0.265366
ENSG00000171860	15.6029	80.9528	-1.7971	6.6738e-07	4.3861e-06	C3AR1	protein_coding	complement component 3a receptor 1 [Source:HGNC Symbol;Acc:1319]	80	79	18	14	3.25322	3.88205	0.794264	0.660498
ENSG00000146278	350.144	1247.81	-1.7955	2.4082e-50	1.7033e-48	PNRC1	protein_coding	proline-rich nuclear receptor coactivator 1 [Source:HGNC Symbol;Acc:17278]	1288	1172	364	352	49.3658	54.2811	15.1384	15.6521
ENSG00000067992	42.9478	176.538	-1.7942	7.002e-11	7.3798e-10	PDK3	protein_coding	pyruvate dehydrogenase kinase, isozyme 3 [Source:HGNC Symbol;Acc:8811]	182	166	48	40	7.14809	7.87839	2.04564	1.82263
ENSG00000110665	0.502538	25.8398	-1.7918	2.4431e-05	0.00012468	C11orf21	protein_coding	chromosome 11 open reading frame 21 [Source:HGNC Symbol;Acc:13231]	33	19	0	1	1.12436	0.78227	0	0.0395287
ENSG00000183160	127.546	472.649	-1.7862	1.1877e-20	2.4863e-19	TMEM119	protein_coding	transmembrane protein 119 [Source:HGNC Symbol;Acc:27884]	495	438	155	107	24.6602	26.368	8.37901	6.18438
ENSG00000168702	9.7053	60.0163	-1.7848	5.6029e-06	3.1719e-05	LRP1B	protein_coding	low density lipoprotein receptor-related protein 1B [Source:HGNC Symbol;Acc:6693]	72	48	13	7	0.799393	0.643991	0.156617	0.0901667
ENSG00000137965	322.935	1145.65	-1.7829	3.2645e-42	1.7335e-40	IFI44	protein_coding	interferon-induced protein 44 [Source:HGNC Symbol;Acc:16938]	1173	1084	310	349	66.6099	74.3843	19.1017	22.9925
ENSG00000125968	1143.49	3973.86	-1.7814	3.1327e-112	8.2648e-110	ID1	protein_coding	inhibitor of DNA binding 1, dominant negative helix-loop-helix protein [Source:HGNC Symbol;Acc:5360]	4411	3475	1259	1083	214.99	204.667	66.585	61.2393
ENSG00000137752	459.106	1612.08	-1.7804	2.6614e-56	2.1899e-54	CASP1	protein_coding	caspase 1, apoptosis-related cysteine peptidase [Source:HGNC Symbol;Acc:1499]	1693	1490	443	494	90.1655	95.8916	25.601	30.5232
ENSG00000260822	16.0257	83.7236	-1.7781	1.3406e-06	8.4277e-06	GS1-358P8.4	sense_overlapping	-	110	59	21	12	1.19983	0.777663	0.248552	0.151855
ENSG00000095303	229.762	814.789	-1.7743	3.9909e-36	1.7052e-34	PTGS1	protein_coding	prostaglandin-endoperoxide synthase 1 (prostaglandin G/H synthase and cyclooxygenase) [Source:HGNC Symbol;Acc:9604]	869	742	242	228	19.3203	19.9347	5.83819	5.88097
ENSG00000101144	4.33682	40.7543	-1.7725	2.4685e-05	0.00012586	BMP7	protein_coding	bone morphogenetic protein 7 [Source:HGNC Symbol;Acc:1074]	40	40	7	2	1.73645	2.09832	0.329737	0.100728
ENSG00000243811	5.42162	43.4392	-1.7713	1.9388e-05	0.0001007	APOBEC3D	protein_coding	apolipoprotein B mRNA editing enzyme, catalytic polypeptide-like 3D [Source:HGNC Symbol;Acc:17354]	47	39	4	7	1.73372	1.73842	0.160107	0.29957
ENSG00000147852	59.1861	228.584	-1.7683	9.0914e-13	1.1344e-11	VLDLR	protein_coding	very low density lipoprotein receptor [Source:HGNC Symbol;Acc:12698]	262	193	61	60	7.00788	6.23811	1.77045	1.8619
ENSG00000109107	54.1873	211.735	-1.7666	4.7823e-12	5.6254e-11	ALDOC	protein_coding	aldolase C, fructose-bisphosphate [Source:HGNC Symbol;Acc:418]	216	201	60	51	11.1731	12.564	3.36776	3.06063
ENSG00000116711	216.616	768.859	-1.7657	2.9586e-31	1.0245e-29	PLA2G4A	protein_coding	phospholipase A2, group IVA (cytosolic, calcium-dependent) [Source:HGNC Symbol;Acc:9035]	783	731	245	199	20.8813	23.5573	7.08976	6.15701
ENSG00000231890	8.77994	55.2971	-1.7615	9.4194e-06	5.1636e-05	AC093391.2	antisense	-	51	57	10	8	3.7574	5.07462	0.799441	0.683798
ENSG00000113100	0.475964	24.8226	-1.7603	3.3244e-05	0.00016563	CDH9	protein_coding	cadherin 9, type 2 (T1-cadherin) [Source:HGNC Symbol;Acc:1768]	26	23	1	0	0.899481	0.961518	0.0375394	0
ENSG00000174292	4.41655	39.3654	-1.7579	2.7707e-05	0.00014002	TNK1	protein_coding	tyrosine kinase, non-receptor, 1 [Source:HGNC Symbol;Acc:11940]	37	40	4	5	1.45424	1.89979	0.170594	0.227995
ENSG00000172183	30.9955	132.357	-1.756	1.9423e-08	1.5786e-07	ISG20	protein_coding	interferon stimulated exonuclease gene 20kDa [Source:HGNC Symbol;Acc:6130]	137	124	25	38	4.94881	5.41269	0.979917	1.59252
ENSG00000134775	133.999	481.811	-1.7534	2.4176e-21	5.185e-20	FHOD3	protein_coding	formin homology 2 domain containing 3 [Source:HGNC Symbol;Acc:26178]	528	427	158	117	8.09822	7.91397	2.62955	2.08191
ENSG00000171680	62.4647	236.74	-1.7488	5.9003e-13	7.4351e-12	PLEKHG5	protein_coding	pleckstrin homology domain containing, family G (with RhoGef domain) member 5 [Source:HGNC Symbol;Acc:29105]	252	216	70	58	3.48409	3.60873	1.05016	0.930331
ENSG00000184828	88.7248	326.48	-1.7462	1.3376e-15	2.0662e-14	ZBTB7C	protein_coding	zinc finger and BTB domain containing 7C [Source:HGNC Symbol;Acc:31700]	381	270	103	79	16.2138	13.8846	4.75627	3.90038
ENSG00000110042	38.6907	155.603	-1.7452	1.1065e-09	1.0326e-08	DTX4	protein_coding	deltex homolog 4 (Drosophila) [Source:HGNC Symbol;Acc:29151]	168	140	38	41	4.27146	4.30136	1.04838	1.2094
ENSG00000128011	4.41655	39.8301	-1.7442	3.3369e-05	0.00016618	LRFN1	protein_coding	leucine rich repeat and fibronectin type III domain containing 1 [Source:HGNC Symbol;Acc:29290]	32	45	4	5	0.511124	0.86856	0.0693275	0.0926545
ENSG00000260966	15.1269	78.3506	-1.7427	3.0735e-06	1.8186e-05	RP11-690D19.3	sense_overlapping	-	108	51	17	14	1.14069	0.650919	0.194833	0.171551
ENSG00000090661	34.221	140.226	-1.7418	5.1266e-09	4.4403e-08	CERS4	protein_coding	ceramide synthase 4 [Source:HGNC Symbol;Acc:23747]	160	119	36	34	8.19787	7.36781	2.00149	2.02106
ENSG00000184602	114.378	408.734	-1.7399	8.0681e-20	1.6137e-18	SNN	protein_coding	stannin [Source:HGNC Symbol;Acc:11149]	447	363	121	113	7.28851	7.15235	2.14085	2.13762
ENSG00000189431	2.93551	33.1576	-1.7395	4.2389e-05	0.00020649	RASSF10	pseudogene	Ras association (RalGDS/AF-6) domain family (N-terminal) member 10 [Source:HGNC Symbol;Acc:33984]	38	28	3	3	1.22515	1.09088	0.104954	0.112214
ENSG00000196754	1168.44	3939.28	-1.7393	1.0299e-115	2.9514e-113	S100A2	protein_coding	S100 calcium binding protein A2 [Source:HGNC Symbol;Acc:10492]	4167	3616	1190	1198	345.142	361.92	106.952	115.12
ENSG00000151136	0	23.4355	-1.7378	3.5383e-05	0.00017534	BTBD11	protein_coding	BTB (POZ) domain containing 11 [Source:HGNC Symbol;Acc:23844]	17	28	0	0	0.31866	0.63423	0	0
ENSG00000156298	16.7143	81.1369	-1.7337	1.544e-06	9.6044e-06	TSPAN7	protein_coding	tetraspanin 7 [Source:HGNC Symbol;Acc:11854]	84	76	14	20	3.91397	4.2792	0.70784	1.08116
ENSG00000139597	3.46462	36.8596	-1.7329	4.4602e-05	0.00021683	N4BP2L1	protein_coding	NEDD4 binding protein 2-like 1 [Source:HGNC Symbol;Acc:25037]	52	23	2	5	1.84627	0.986804	0.0770533	0.20596
ENSG00000167617	1.00508	26.6745	-1.7324	4.7113e-05	0.00022843	CDC42EP5	protein_coding	CDC42 effector protein (Rho GTPase binding) 5 [Source:HGNC Symbol;Acc:17408]	30	23	0	2	2.81268	2.60578	0	0.217545
ENSG00000171903	4.91908	40.1984	-1.7287	3.5179e-05	0.00017438	CYP4F11	protein_coding	cytochrome P450, family 4, subfamily F, polypeptide 11 [Source:HGNC Symbol;Acc:13265]	40	39	4	6	0.946599	1.11527	0.102715	0.164732
ENSG00000185483	50.2733	192.375	-1.7264	5.5008e-11	5.8683e-10	ROR1	protein_coding	receptor tyrosine kinase-like orphan receptor 1 [Source:HGNC Symbol;Acc:10256]	203	177	56	47	3.76079	3.96248	1.12574	1.01018
ENSG00000003096	18.6978	88.3636	-1.7263	1.21e-06	7.6729e-06	KLHL13	protein_coding	kelch-like family member 13 [Source:HGNC Symbol;Acc:22931]	84	89	15	23	1.41317	1.80933	0.273827	0.448915
ENSG00000175274	384.336	1299.09	-1.7235	1.2744e-49	8.7167e-48	TP53I11	protein_coding	tumor protein p53 inducible protein 11 [Source:HGNC Symbol;Acc:16842]	1430	1146	420	367	60.0038	58.1083	19.1232	17.8661
ENSG00000042062	25.3879	108.736	-1.7205	1.2458e-07	9.1337e-07	FAM65C	protein_coding	family with sequence similarity 65, member C [Source:HGNC Symbol;Acc:16168]	122	94	28	24	2.60001	2.42077	0.647503	0.593398
ENSG00000166979	26.5524	114.012	-1.719	1.6559e-07	1.192e-06	EVA1C	protein_coding	eva-1 homolog C (C. elegans) [Source:HGNC Symbol;Acc:13239]	137	91	22	32	5.48848	4.40538	0.956364	1.48731
ENSG00000064309	176.449	609.265	-1.7187	2.1623e-25	5.7046e-24	CDON	protein_coding	cell adhesion associated, oncogene regulated [Source:HGNC Symbol;Acc:17104]	640	563	168	192	11.8242	12.5693	3.36799	4.11542
ENSG00000106479	46.7289	180.89	-1.7185	3.9101e-10	3.8342e-09	ZNF862	protein_coding	zinc finger protein 862 [Source:HGNC Symbol;Acc:34519]	189	168	57	39	6.10811	6.56093	1.99889	1.46228
ENSG00000254166	33.5856	137.918	-1.7176	2.2261e-08	1.8014e-07	RP11-255B23.4	lincRNA	-	131	139	41	28	19.2764	24.7162	6.54649	4.78006
ENSG00000184985	79.998	290.185	-1.7173	1.9116e-14	2.7178e-13	SORCS2	protein_coding	sortilin-related VPS10 domain containing receptor 2 [Source:HGNC Symbol;Acc:16698]	299	273	91	73	5.87806	6.48539	1.94121	1.66497
ENSG00000170382	6.76979	47.3304	-1.7167	2.8977e-05	0.00014577	LRRN2	protein_coding	leucine rich repeat neuronal 2 [Source:HGNC Symbol;Acc:16914]	47	46	10	4	0.833551	0.985832	0.192443	0.0823027
ENSG00000081041	774.845	2581.15	-1.7164	1.925e-77	2.6663e-75	CXCL2	protein_coding	chemokine (C-X-C motif) ligand 2 [Source:HGNC Symbol;Acc:4603]	2816	2298	759	823	192.987	190.308	56.4425	65.4358
ENSG00000106560	15.6826	76.1356	-1.7157	2.499e-06	1.4957e-05	GIMAP2	protein_coding	GTPase, IMAP family member 2 [Source:HGNC Symbol;Acc:21789]	78	72	15	17	5.46338	6.09411	1.14006	1.38145
ENSG00000233369	39.3769	156.809	-1.7146	4.8318e-09	4.1981e-08	RP11-396K3.1	pseudogene	-	161	148	50	31	3.71245	4.12389	1.25105	0.829309
ENSG00000128274	252.084	853.69	-1.7122	5.7568e-35	2.3394e-33	A4GALT	protein_coding	alpha 1,4-galactosyltransferase [Source:HGNC Symbol;Acc:18149]	911	777	253	262	33.3088	34.3299	10.0376	11.1138
ENSG00000116883	11.9015	66.8746	-1.7081	1.3292e-05	7.0968e-05	RP11-268J15.5	protein_coding	-	64	67	6	18	1.88042	2.37882	0.191292	0.613576
ENSG00000115009	5.92416	43.5304	-1.7078	3.809e-05	0.00018708	CCL20	protein_coding	chemokine (C-C motif) ligand 20 [Source:HGNC Symbol;Acc:10619]	52	35	4	8	3.76432	3.06169	0.314204	0.671881
ENSG00000136002	236.397	800.797	-1.7033	4.1751e-30	1.3553e-28	ARHGEF4	protein_coding	Rho guanine nucleotide exchange factor (GEF) 4 [Source:HGNC Symbol;Acc:684]	876	711	276	209	23.7247	23.2689	8.111	6.56693
ENSG00000003137	100.786	353.072	-1.6995	5.3133e-17	9.0577e-16	CYP26B1	protein_coding	cytochrome P450, family 26, subfamily B, polypeptide 1 [Source:HGNC Symbol;Acc:20581]	376	322	103	103	9.02859	9.34327	2.68373	2.86939
ENSG00000196422	164.173	563.699	-1.6982	4.155e-22	9.3577e-21	PPP1R26	protein_coding	protein phosphatase 1, regulatory subunit 26 [Source:HGNC Symbol;Acc:29089]	580	531	195	142	7.83246	8.66514	2.85742	2.22474
ENSG00000125170	47.3909	178.758	-1.698	2.8745e-10	2.8677e-09	DOK4	protein_coding	docking protein 4 [Source:HGNC Symbol;Acc:19868]	194	160	51	46	10.8007	10.7642	3.08098	2.97117
ENSG00000160999	22.1093	97.0635	-1.6972	7.2834e-07	4.7679e-06	SH2B2	protein_coding	SH2B adaptor protein 2 [Source:HGNC Symbol;Acc:17381]	116	78	19	26	4.32028	3.51042	0.767849	1.12343
ENSG00000105835	2336.91	7618.3	-1.6949	7.3705e-143	3.311e-140	NAMPT	protein_coding	nicotinamide phosphoribosyltransferase [Source:HGNC Symbol;Acc:30092]	8365	6738	2322	2451	393.501	383.02	118.525	133.765
ENSG00000258590	3.88743	35.5671	-1.6946	6.0639e-05	0.00028739	NBEAP1	pseudogene	neurobeachin pseudogene 1 [Source:HGNC Symbol;Acc:1007]	36	34	5	3	0.968189	1.10496	0.145914	0.093605
ENSG00000132274	138.708	475.146	-1.6942	1.9804e-21	4.2753e-20	TRIM22	protein_coding	tripartite motif containing 22 [Source:HGNC Symbol;Acc:16379]	510	430	151	133	23.7839	24.2322	7.64115	7.19589
ENSG00000057657	222.118	746.055	-1.6934	2.289e-30	7.5337e-29	PRDM1	protein_coding	PR domain containing 1, with ZNF domain [Source:HGNC Symbol;Acc:9346]	825	655	246	209	21.0056	20.1527	6.79649	6.17372
ENSG00000176971	429.932	1414.13	-1.6889	1.4346e-52	1.0938e-50	FIBIN	protein_coding	fin bud initiation factor homolog (zebrafish) [Source:HGNC Symbol;Acc:33747]	1556	1248	444	435	27.9818	27.1201	8.66399	9.0756
ENSG00000254667	6.45327	45.8469	-1.6875	4.6619e-05	0.00022623	AP000783.1	protein_coding	Uncharacterized protein [Source:UniProtKB/TrEMBL;Acc:E9PS84]	51	40	3	10	2.49699	2.36656	0.159381	0.568023
ENSG00000231711	0.475964	23.5267	-1.6869	6.6332e-05	0.00031232	RP11-398F12.1	processed_transcript	-	22	24	1	0	0.771979	1.01767	0.038076	0
ENSG00000198133	36.1514	141.342	-1.686	1.2573e-08	1.0417e-07	TMEM229B	protein_coding	transmembrane protein 229B [Source:HGNC Symbol;Acc:20130]	142	136	39	35	4.42753	5.12417	1.31949	1.26608
ENSG00000124466	48.9782	182.744	-1.6854	3.5058e-10	3.4684e-09	LYPD3	protein_coding	LY6/PLAUR domain containing 3 [Source:HGNC Symbol;Acc:24880]	187	173	48	52	9.77604	10.9289	2.7229	3.15388
ENSG00000118503	468.886	1538.55	-1.685	9.8157e-54	7.8061e-52	TNFAIP3	protein_coding	tumor necrosis factor, alpha-induced protein 3 [Source:HGNC Symbol;Acc:11896]	1587	1446	491	468	64.7307	71.271	21.7312	22.1462
ENSG00000119630	264.773	881.478	-1.6843	1.5782e-32	5.7779e-31	PGF	protein_coding	placental growth factor [Source:HGNC Symbol;Acc:8893]	935	807	305	238	32.7241	34.1303	11.5831	9.6639
ENSG00000019991	48.3186	184.682	-1.6811	5.701e-09	4.9122e-08	HGF	protein_coding	hepatocyte growth factor (hepapoietin A; scatter factor) [Source:HGNC Symbol;Acc:4893]	214	154	35	63	6.94098	6.03585	1.23181	2.37065
ENSG00000244509	330.656	1088.11	-1.68	9.3589e-40	4.5219e-38	APOBEC3C	protein_coding	apolipoprotein B mRNA editing enzyme, catalytic polypeptide-like 3C [Source:HGNC Symbol;Acc:17353]	1164	988	322	353	53.1361	54.501	15.95	18.6953
ENSG00000133321	19.5966	87.1588	-1.679	1.6416e-06	1.0143e-05	RARRES3	protein_coding	retinoic acid receptor responder (tazarotene induced) 3 [Source:HGNC Symbol;Acc:9869]	85	86	19	21	6.49263	7.938	1.5748	1.86098
ENSG00000109339	4.83936	38.8078	-1.6785	6.3239e-05	0.00029835	MAPK10	protein_coding	mitogen-activated protein kinase 10 [Source:HGNC Symbol;Acc:6872]	43	34	7	3	2.03876	1.94799	0.360135	0.165021
ENSG00000130208	90.4981	317.672	-1.6712	3.4863e-13	4.4746e-12	APOC1	protein_coding	apolipoprotein C-I [Source:HGNC Symbol;Acc:607]	404	235	93	92	47.1218	33.1222	11.7704	12.4494
ENSG00000110002	135.483	456.812	-1.6694	3.7251e-20	7.6062e-19	VWA5A	protein_coding	von Willebrand factor A domain containing 5A [Source:HGNC Symbol;Acc:6658]	474	427	140	137	10.1256	11.0226	3.2452	3.39535
ENSG00000163071	2.40639	30.9375	-1.668	9.2515e-05	0.00042457	SPATA18	protein_coding	spermatogenesis associated 18 [Source:HGNC Symbol;Acc:29579]	26	34	4	1	0.959733	1.51659	0.160216	0.042825
ENSG00000136490	22.3727	95.8604	-1.6666	1.108e-06	7.0667e-06	LIMD2	protein_coding	LIM domain containing 2 [Source:HGNC Symbol;Acc:28142]	111	80	28	18	5.24443	4.56747	1.4355	0.986661
ENSG00000213412	40.0123	152.633	-1.6657	1.3331e-08	1.1023e-07	HNRNPA1P33	pseudogene	heterogeneous nuclear ribonucleoprotein A1 pseudogene 33 [Source:HGNC Symbol;Acc:44990]	188	118	45	37	18.0974	13.7262	4.70046	4.13219
ENSG00000124097	5.92416	42.7938	-1.6611	6.6862e-05	0.00031429	HMGB1P1	pseudogene	high mobility group box 1 pseudogene 1 [Source:HGNC Symbol;Acc:4993]	36	47	4	8	3.0568	4.82251	0.368547	0.788087
ENSG00000166289	52.2303	189.595	-1.6603	2.5612e-10	2.5753e-09	PLEKHF1	protein_coding	pleckstrin homology domain containing, family F (with FYVE domain) member 1 [Source:HGNC Symbol;Acc:20764]	203	172	58	49	9.34586	9.56892	2.89748	2.61722
ENSG00000065357	208.022	684.291	-1.6594	2.0596e-27	5.882e-26	DGKA	protein_coding	diacylglycerol kinase, alpha 80kDa [Source:HGNC Symbol;Acc:2849]	712	638	228	198	33.4352	36.2039	11.6179	10.7872
ENSG00000163874	718.481	2300.44	-1.6594	3.3208e-75	4.4157e-73	ZC3H12A	protein_coding	zinc finger CCCH-type containing 12A [Source:HGNC Symbol;Acc:26259]	2433	2112	762	708	107.345	112.602	36.4808	36.2404
ENSG00000132639	241.214	787.095	-1.6575	1.9931e-31	6.945e-30	SNAP25	protein_coding	synaptosomal-associated protein, 25kDa [Source:HGNC Symbol;Acc:11132]	838	718	246	247	31.0817	32.1807	9.90066	10.6286
ENSG00000145506	16.5548	75.948	-1.6569	5.2907e-06	3.0074e-05	NKD2	protein_coding	naked cuticle homolog 2 (Drosophila) [Source:HGNC Symbol;Acc:17046]	86	65	20	14	4.0811	3.72738	1.02986	0.770774
ENSG00000142494	0.502538	23.2461	-1.6547	8.875e-05	0.00040862	SLC47A1	protein_coding	solute carrier family 47, member 1 [Source:HGNC Symbol;Acc:25588]	31	16	0	1	1.1707	0.730157	0	0.0438133
ENSG00000105963	2.45954	29.2681	-1.6489	0.00011076	0.00049889	ADAP1	protein_coding	ArfGAP with dual PH domains 1 [Source:HGNC Symbol;Acc:16486]	32	26	2	3	1.52525	1.49753	0.10344	0.165895
ENSG00000172927	209.873	685.497	-1.6477	1.8235e-26	4.9848e-25	MYEOV	protein_coding	myeloma overexpressed [Source:HGNC Symbol;Acc:7563]	705	646	234	196	34.2378	37.9105	12.3311	11.0431
ENSG00000189221	39.2729	147.45	-1.6466	1.9821e-08	1.6094e-07	MAOA	protein_coding	monoamine oxidase A [Source:HGNC Symbol;Acc:6833]	166	127	35	45	4.54362	4.20058	1.03952	1.42898
ENSG00000176566	0	21.1189	-1.6455	8.185e-05	0.00037914	DCAF4L2	protein_coding	DDB1 and CUL4 associated factor 4-like 2 [Source:HGNC Symbol;Acc:26657]	18	23	0	0	0.292437	0.451543	0	0
ENSG00000188352	16.5814	74.8362	-1.6395	6.6896e-06	3.7424e-05	FOCAD	protein_coding	focadhesin [Source:HGNC Symbol;Acc:23377]	86	63	19	15	3.12747	2.76851	0.749752	0.632858
ENSG00000198125	29.9373	117.26	-1.6387	2.4137e-07	1.7057e-06	MB	protein_coding	myoglobin [Source:HGNC Symbol;Acc:6915]	120	111	27	34	8.21345	9.18075	2.00529	2.69987
ENSG00000112414	136.065	448.1	-1.6379	2.0307e-19	3.9383e-18	GPR126	protein_coding	G protein-coupled receptor 126 [Source:HGNC Symbol;Acc:13841]	484	403	137	141	10.2864	10.3498	3.15941	3.47661
ENSG00000111674	344.906	1099.79	-1.6362	4.8524e-40	2.3932e-38	ENO2	protein_coding	enolase 2 (gamma, neuronal) [Source:HGNC Symbol;Acc:3353]	1152	1019	372	334	52.7667	56.4018	18.4893	17.749
ENSG00000109944	4.91908	37.2331	-1.6353	9.8381e-05	0.00044834	C11orf63	protein_coding	chromosome 11 open reading frame 63 [Source:HGNC Symbol;Acc:26288]	42	32	4	6	1.04043	0.957912	0.107521	0.172439
ENSG00000130475	5.87101	40.1984	-1.6329	8.5209e-05	0.00039319	FCHO1	protein_coding	FCH domain only 1 [Source:HGNC Symbol;Acc:29002]	40	39	6	6	1.73784	2.04751	0.282859	0.302428
ENSG00000187634	16.5814	74.282	-1.6311	7.3904e-06	4.1151e-05	SAMD11	protein_coding	sterile alpha motif domain containing 11 [Source:HGNC Symbol;Acc:28706]	80	67	19	15	3.94186	3.9893	1.01586	0.857476
ENSG00000109861	2760.05	8591.33	-1.6309	4.3873e-181	3.3146e-178	CTSC	protein_coding	cathepsin C [Source:HGNC Symbol;Acc:2528]	9278	7728	2889	2756	281.961	283.8	95.2688	97.1702
ENSG00000196456	42.9478	156.995	-1.6295	8.9177e-09	7.5392e-08	ZNF775	protein_coding	zinc finger protein 775 [Source:HGNC Symbol;Acc:28501]	159	150	48	40	8.90721	10.1542	2.91779	2.59971
ENSG00000149506	1.48104	26.4869	-1.6268	0.00013355	0.00059241	ZP1	protein_coding	zona pellucida glycoprotein 1 (sperm receptor) [Source:HGNC Symbol;Acc:13187]	38	16	1	2	2.07077	1.05361	0.0591312	0.126444
ENSG00000115841	67.5721	240.067	-1.6256	1.6831e-09	1.5396e-08	RMDN2	protein_coding	regulator of microtubule dynamics 2 [Source:HGNC Symbol;Acc:26567]	282	197	48	89	11.1486	9.41126	2.05912	4.08207
ENSG00000224189	5.84444	40.0108	-1.6245	9.5012e-05	0.00043468	HOXD-AS1	antisense	HOXD cluster antisense RNA 1 [Source:HGNC Symbol;Acc:43755]	48	32	7	5	2.65319	2.13741	0.41985	0.320639
ENSG00000152256	240.052	766.612	-1.6243	8.5916e-28	2.4922e-26	PDK1	protein_coding	pyruvate dehydrogenase kinase, isozyme 1 [Source:HGNC Symbol;Acc:8809]	867	657	233	257	37.9425	34.7442	11.0645	13.0485
ENSG00000246100	0.475964	22.1361	-1.6226	0.00011851	0.00053108	CTC-774J1.2	lincRNA	-	25	19	1	0	1.14511	1.05165	0.0497023	0
ENSG00000169435	12.8002	62.6099	-1.6216	2.5023e-05	0.0001275	RASSF6	protein_coding	Ras association (RalGDS/AF-6) domain family member 6 [Source:HGNC Symbol;Acc:20796]	74	51	10	16	1.31803	1.09767	0.193269	0.330622
ENSG00000198771	1.48104	25.3768	-1.6109	0.0001555	0.00068104	RCSD1	protein_coding	RCSD domain containing 1 [Source:HGNC Symbol;Acc:28310]	32	19	1	2	1.17559	0.843468	0.0398633	0.0852421
ENSG00000057294	7.27233	45.1086	-1.6102	9.0364e-05	0.00041548	PKP2	protein_coding	plakophilin 2 [Source:HGNC Symbol;Acc:9024]	41	47	10	5	1.29482	1.79363	0.342684	0.183196
ENSG00000104765	1207.96	3725.28	-1.6087	7.7539e-77	1.0651e-74	BNIP3L	protein_coding	BCL2/adenovirus E1B 19kDa interacting protein 3-like [Source:HGNC Symbol;Acc:1085]	4101	3286	1159	1306	173.837	168.318	53.3095	64.2266
ENSG00000235385	630.155	1949.12	-1.6082	1.151e-62	1.1188e-60	GS1-600G8.5	lincRNA	-	2080	1774	644	644	92.6792	95.5176	31.1368	33.2908
ENSG00000169550	18.4852	81.5121	-1.6072	1.0568e-05	5.7345e-05	MUC15	protein_coding	mucin 15, cell surface associated [Source:HGNC Symbol;Acc:14956]	68	90	23	15	1.41457	2.2624	0.519175	0.362016
ENSG00000056291	0	20.0984	-1.6062	0.00011534	0.00051784	NPFFR2	protein_coding	neuropeptide FF receptor 2 [Source:HGNC Symbol;Acc:4525]	23	17	0	0	0.801341	0.715731	0	0
ENSG00000076258	20.8916	87.343	-1.6048	4.8851e-06	2.7931e-05	FMO4	protein_coding	flavin containing monooxygenase 4 [Source:HGNC Symbol;Acc:3772]	89	83	27	16	4.93461	5.56098	1.62441	1.02921
ENSG00000178695	506.68	1568.64	-1.6042	2.9363e-50	2.068e-48	KCTD12	protein_coding	potassium channel tetramerisation domain containing 12 [Source:HGNC Symbol;Acc:14678]	1652	1446	506	529	17.7469	18.7712	5.89837	6.59308
ENSG00000133466	26.2867	103.273	-1.604	1.1747e-06	7.4695e-06	C1QTNF6	protein_coding	C1q and tumor necrosis factor related protein 6 [Source:HGNC Symbol;Acc:14343]	109	95	32	22	3.02175	3.18249	0.962613	0.707579
ENSG00000125772	399.598	1240.28	-1.6037	3.0458e-43	1.6653e-41	GPCPD1	protein_coding	glycerophosphocholine phosphodiesterase GDE1 homolog (S. cerevisiae) [Source:HGNC Symbol;Acc:26957]	1375	1086	413	404	24.876	23.742	8.10767	8.47966
ENSG00000124074	21.9764	89.5614	-1.6028	3.3605e-06	1.9771e-05	ENKD1	protein_coding	enkurin domain containing 1 [Source:HGNC Symbol;Acc:25246]	107	72	24	21	6.18007	5.0252	1.50415	1.40718
ENSG00000107957	407.849	1269.87	-1.602	3.6057e-38	1.651e-36	SH3PXD2A	protein_coding	SH3 and PX domains 2A [Source:HGNC Symbol;Acc:23664]	1254	1240	424	410	12.1493	14.5173	4.45748	4.60849
ENSG00000146950	34.3804	127.447	-1.5975	2.0942e-07	1.4895e-06	SHROOM2	protein_coding	shroom family member 2 [Source:HGNC Symbol;Acc:630]	136	116	30	40	2.07237	2.13598	0.496042	0.707144
ENSG00000164690	1.48104	24.9156	-1.5972	0.00017664	0.00076477	SHH	protein_coding	sonic hedgehog [Source:HGNC Symbol;Acc:10848]	25	24	1	2	0.920932	1.06834	0.0399721	0.0854747
ENSG00000110900	5.84444	38.9937	-1.5964	0.00012725	0.00056735	TSPAN11	protein_coding	tetraspanin 11 [Source:HGNC Symbol;Acc:30795]	41	36	7	5	1.08643	1.15274	0.201272	0.153712
ENSG00000214193	28.06	108.923	-1.5963	1.268e-06	8.0013e-06	SH3D21	protein_coding	SH3 domain containing 21 [Source:HGNC Symbol;Acc:26236]	114	101	22	35	3.18654	3.41151	0.667277	1.13502
ENSG00000101489	0.475964	21.8573	-1.5955	0.00014967	0.0006567	CELF4	protein_coding	CUGBP, Elav-like family member 4 [Source:HGNC Symbol;Acc:14015]	28	16	1	0	0.931094	0.642934	0.0360832	0
ENSG00000261534	24.0397	95.2133	-1.5951	2.2815e-06	1.3765e-05	RP11-244O19.1	sense_overlapping	-	106	83	22	27	1.51478	1.43329	0.341143	0.447639
ENSG00000163131	82.803	273.601	-1.5949	1.4304e-12	1.752e-11	CTSS	protein_coding	cathepsin S [Source:HGNC Symbol;Acc:2545]	298	244	80	89	7.87715	7.79388	2.29463	2.72937
ENSG00000167964	48.9782	170.886	-1.5949	4.419e-09	3.8555e-08	RAB26	protein_coding	RAB26, member RAS oncogene family [Source:HGNC Symbol;Acc:14259]	183	155	48	52	8.71484	8.91971	2.48038	2.87297
ENSG00000186469	317.776	983.825	-1.5919	1.9453e-34	7.7351e-33	GNG2	protein_coding	guanine nucleotide binding protein (G protein), gamma 2 [Source:HGNC Symbol;Acc:4404]	1042	902	315	334	48.6778	50.9191	15.9677	18.1021
ENSG00000042980	16.2383	71.5025	-1.5891	1.7699e-05	9.2535e-05	ADAM28	protein_coding	ADAM metallopeptidase domain 28 [Source:HGNC Symbol;Acc:206]	80	62	13	20	2.63431	2.46706	0.464505	0.76406
ENSG00000148735	54.3467	186.167	-1.5881	1.4031e-09	1.2934e-08	PLEKHS1	protein_coding	pleckstrin homology domain containing, family S member 1 [Source:HGNC Symbol;Acc:26285]	204	165	54	57	4.83401	4.72467	1.38848	1.56701
ENSG00000155265	77.1954	255.639	-1.5864	7.9778e-12	9.1764e-11	GOLGA7B	protein_coding	golgin A7 family, member B [Source:HGNC Symbol;Acc:31668]	258	245	83	75	7.84068	8.99727	2.73704	2.64433
ENSG00000133401	22.0562	88.6355	-1.5854	4.5285e-06	2.6054e-05	PDZD2	protein_coding	PDZ domain containing 2 [Source:HGNC Symbol;Acc:18486]	105	72	21	24	1.93264	1.60142	0.419421	0.512499
ENSG00000251322	4.83936	36.123	-1.5846	0.00017044	0.00074025	SHANK3	protein_coding	SH3 and multiple ankyrin repeat domains 3 [Source:HGNC Symbol;Acc:14294]	36	35	7	3	0.269157	0.316215	0.0567899	0.0260223
ENSG00000052850	11.8483	58.3503	-1.5827	5.4274e-05	0.00025982	ALX4	protein_coding	ALX homeobox 4 [Source:HGNC Symbol;Acc:450]	66	50	8	16	0.619866	0.567459	0.0815291	0.174339
ENSG00000104177	3.94058	32.6017	-1.58	0.00019621	0.00084267	MYEF2	protein_coding	myelin expression factor 2 [Source:HGNC Symbol;Acc:17940]	38	27	3	5	1.18964	1.02143	0.101911	0.181603
ENSG00000123384	1517.68	4587.52	-1.5786	1.4381e-74	1.8674e-72	LRP1	protein_coding	low density lipoprotein receptor-related protein 1 [Source:HGNC Symbol;Acc:6692]	4932	4145	1758	1355	101.31	102.888	39.1849	32.2916
ENSG00000162409	16.0257	70.6678	-1.5769	2.2852e-05	0.00011705	PRKAA2	protein_coding	protein kinase, AMP-activated, alpha 2 catalytic subunit [Source:HGNC Symbol;Acc:9377]	83	58	21	12	0.479543	0.404938	0.131655	0.080436
ENSG00000121440	32.4766	121.883	-1.5755	1.1401e-06	7.2577e-06	PDZRN3	protein_coding	PDZ domain containing ring finger 3 [Source:HGNC Symbol;Acc:17704]	154	91	26	40	4.59223	3.2791	0.841289	1.38383
ENSG00000101493	203.103	629.833	-1.5719	6.0272e-23	1.425e-21	ZNF516	protein_coding	zinc finger protein 516 [Source:HGNC Symbol;Acc:28990]	640	600	224	192	10.0794	11.4187	3.82799	3.50813
ENSG00000182326	850.717	2558.02	-1.571	3.7226e-70	4.3573e-68	C1S	protein_coding	complement component 1, s subcomponent [Source:HGNC Symbol;Acc:1247]	2700	2353	854	884	123.358	129.908	42.3381	46.8572
ENSG00000141524	2.88236	30.1957	-1.571	0.00023093	0.00097665	TMC6	protein_coding	transmembrane channel-like 6 [Source:HGNC Symbol;Acc:18021]	28	31	5	1	1.09098	1.45959	0.211396	0.0452041
ENSG00000133048	30.4399	113.092	-1.5706	8.826e-07	5.7059e-06	CHI3L1	protein_coding	chitinase 3-like 1 (cartilage glycoprotein-39) [Source:HGNC Symbol;Acc:1932]	117	106	27	35	4.97512	5.44671	1.24581	1.72666
ENSG00000188910	2.40639	28.6175	-1.5698	0.00023469	0.00099106	GJB3	protein_coding	gap junction protein, beta 3, 31kDa [Source:HGNC Symbol;Acc:4285]	39	19	4	1	1.04939	0.617787	0.116789	0.0312172
ENSG00000187608	183.453	569.337	-1.5697	1.7478e-21	3.7935e-20	ISG15	protein_coding	ISG15 ubiquitin-like modifier [Source:HGNC Symbol;Acc:4053]	627	502	207	169	47.6233	46.0751	17.0605	14.8922
ENSG00000178882	0.502538	21.2101	-1.5694	0.00018901	0.00081396	FAM101A	protein_coding	family with sequence similarity 101, member A [Source:HGNC Symbol;Acc:27051]	23	19	0	1	0.709354	0.708108	0	0.0357812
ENSG00000116285	1919.24	5721.04	-1.5661	1.2739e-122	4.4111e-120	ERRFI1	protein_coding	ERBB receptor feedback inhibitor 1 [Source:HGNC Symbol;Acc:18185]	6044	5258	1965	1958	218.765	229.977	77.1763	82.2215
ENSG00000129675	37.8185	135.591	-1.5619	3.5793e-07	2.4583e-06	ARHGEF6	protein_coding	Rac/Cdc42 guanine nucleotide exchange factor (GEF) 6 [Source:HGNC Symbol;Acc:685]	168	104	33	44	1.99222	1.4903	0.424631	0.605342
ENSG00000144366	40.6743	141.988	-1.5592	8.6202e-08	6.4394e-07	GULP1	protein_coding	GULP, engulfment adaptor PTB domain containing 1 [Source:HGNC Symbol;Acc:18649]	153	128	39	44	4.92991	4.98389	1.36358	1.64483
ENSG00000205336	56.5671	189.406	-1.5573	3.0357e-09	2.6895e-08	GPR56	protein_coding	G protein-coupled receptor 56 [Source:HGNC Symbol;Acc:4512]	217	160	65	51	10.1111	9.00884	3.2864	2.75695
ENSG00000177098	2.43297	27.3216	-1.5565	0.00026505	0.0011063	SCN4B	protein_coding	sodium channel, voltage-gated, type IV, beta subunit [Source:HGNC Symbol;Acc:10592]	35	20	3	2	0.728932	0.503338	0.0677968	0.0483247
ENSG00000234722	122.071	386.602	-1.5553	6.8529e-14	9.3362e-13	AC073236.3	lincRNA	-	410	354	153	98	16.3526	17.0615	6.6216	4.5347
ENSG00000125538	1111.66	3291.77	-1.5525	7.0769e-87	1.1643e-84	IL1B	protein_coding	interleukin 1, beta [Source:HGNC Symbol;Acc:5992]	3472	3030	1152	1121	212.344	223.931	76.4508	79.5402
ENSG00000163462	3.91401	31.6775	-1.5504	0.00026069	0.0010892	TRIM46	protein_coding	tripartite motif containing 46 [Source:HGNC Symbol;Acc:19019]	30	32	4	4	0.642643	0.828342	0.0929775	0.0994097
ENSG00000163568	144.055	451.815	-1.5503	2.3097e-14	3.2506e-13	AIM2	protein_coding	absent in melanoma 2 [Source:HGNC Symbol;Acc:357]	450	438	120	173	28.0618	33.0057	8.11996	12.5161
ENSG00000269994	25.5739	97.4386	-1.5495	4.4791e-06	2.5814e-05	RP11-276H19.2	lincRNA	-	100	92	21	31	2.68407	2.98395	0.61162	0.965329
ENSG00000142173	2759.8	8118.47	-1.5479	9.4688e-134	3.8386e-131	COL6A2	protein_coding	collagen, type VI, alpha 2 [Source:HGNC Symbol;Acc:2212]	8857	7228	3031	2621	222.573	219.49	82.6495	76.4139
ENSG00000171488	127.232	394.928	-1.5476	8.7193e-16	1.3698e-14	LRRC8C	protein_coding	leucine rich repeat containing 8 family, member C [Source:HGNC Symbol;Acc:25075]	452	334	129	131	9.24254	8.25297	2.86228	3.10774
ENSG00000128394	102.001	321.388	-1.547	2.5106e-13	3.2601e-12	APOBEC3F	protein_coding	apolipoprotein B mRNA editing enzyme, catalytic polypeptide-like 3F [Source:HGNC Symbol;Acc:17356]	370	270	114	95	17.3298	15.2815	5.79383	5.16221
ENSG00000187498	492.445	1466.19	-1.5465	1.5512e-44	8.6808e-43	COL4A1	protein_coding	collagen, type IV, alpha 1 [Source:HGNC Symbol;Acc:2202]	1582	1320	550	459	33.3594	33.6354	12.5847	11.2291
ENSG00000124920	37.3667	133.558	-1.5448	6.106e-07	4.0417e-06	MYRF	protein_coding	myelin regulatory factor [Source:HGNC Symbol;Acc:1181]	148	117	50	27	3.06814	2.93096	1.12474	0.649378
ENSG00000205268	321.661	961.78	-1.5434	1.6253e-33	6.1534e-32	PDE7A	protein_coding	phosphodiesterase 7A [Source:HGNC Symbol;Acc:8791]	1022	879	339	319	34.6463	36.0085	12.4702	12.5463
ENSG00000185909	79.2829	256.279	-1.5434	1.331e-10	1.3759e-09	KLHDC8B	protein_coding	kelch domain containing 8B [Source:HGNC Symbol;Acc:28557]	287	222	99	64	15.4065	14.4008	5.7667	3.98587
ENSG00000164292	618.541	1829.43	-1.5433	1.1541e-54	9.2223e-53	RHOBTB3	protein_coding	Rho-related BTB domain containing 3 [Source:HGNC Symbol;Acc:18757]	2034	1597	665	601	108.113	102.575	38.3547	37.0614
ENSG00000122884	1096.56	3225.05	-1.5417	1.357e-74	1.7759e-72	P4HA1	protein_coding	prolyl 4-hydroxylase, alpha polypeptide I [Source:HGNC Symbol;Acc:8546]	3520	2870	1077	1162	76.9915	75.8566	25.5614	29.4867
ENSG00000154188	323.804	966.502	-1.5414	1.5738e-33	5.9723e-32	ANGPT1	protein_coding	angiopoietin 1 [Source:HGNC Symbol;Acc:484]	1031	880	334	328	27.5223	28.387	9.67478	10.1583
ENSG00000110400	681.139	2009.9	-1.5401	1.3502e-57	1.1334e-55	PVRL1	protein_coding	poliovirus receptor-related 1 (herpesvirus entry mediator C) [Source:HGNC Symbol;Acc:9706]	2090	1875	730	664	72.3044	78.3846	27.4038	26.6506
ENSG00000105383	3.41147	30.1923	-1.54	0.0003004	0.0012402	CD33	protein_coding	CD33 molecule [Source:HGNC Symbol;Acc:1659]	40	21	4	3	1.27743	0.810416	0.138614	0.111152
ENSG00000171303	21.4739	83.82	-1.5399	1.0168e-05	5.5373e-05	KCNK3	protein_coding	potassium channel, subfamily K, member 3 [Source:HGNC Symbol;Acc:6278]	97	70	24	20	0.850103	0.741325	0.228234	0.203353
ENSG00000003436	1188.52	3491.51	-1.5398	1.6408e-72	2.0201e-70	TFPI	protein_coding	tissue factor pathway inhibitor (lipoprotein-associated coagulation inhibitor) [Source:HGNC Symbol;Acc:11760]	3847	3077	1153	1273	116.257	112.366	37.809	44.6319
ENSG00000176171	925.767	2715.48	-1.5369	2.1407e-74	2.7369e-72	BNIP3	protein_coding	BCL2/adenovirus E1B 19kDa interacting protein 3 [Source:HGNC Symbol;Acc:1084]	2860	2503	961	932	111.597	118.02	40.6891	42.1911
ENSG00000104413	0	20.7438	-1.5362	0.00020293	0.00086955	ESRP1	protein_coding	epithelial splicing regulatory protein 1 [Source:HGNC Symbol;Acc:25966]	34	9	0	0	0.841484	0.269166	0	0
ENSG00000179029	65.0039	210.799	-1.5345	1.0854e-09	1.0153e-08	TMEM107	protein_coding	transmembrane protein 107 [Source:HGNC Symbol;Acc:28128]	250	171	69	64	13.9472	11.528	4.177	4.14234
ENSG00000224818	23.2449	91.415	-1.5338	1.3492e-05	7.1966e-05	RP11-134G8.8	lincRNA	-	105	77	33	15	9.48221	8.40276	3.23373	1.57156
ENSG00000185432	143.521	437.171	-1.5292	4.3376e-17	7.4325e-16	METTL7A	protein_coding	methyltransferase like 7A [Source:HGNC Symbol;Acc:24550]	470	395	159	135	10.7413	10.9085	3.94297	3.57941
ENSG00000160111	7.96088	47.4251	-1.5291	0.00023578	0.00099539	CPAMD8	protein_coding	C3 and PZP-like, alpha-2-macroglobulin domain containing 8 [Source:HGNC Symbol;Acc:23228]	40	52	3	13	1.586	2.49149	0.129073	0.598009
ENSG00000151617	107.952	334.461	-1.5276	1.3562e-13	1.8033e-12	EDNRA	protein_coding	endothelin receptor type A [Source:HGNC Symbol;Acc:3179]	337	321	117	104	7.93337	9.13154	2.9887	2.84041
ENSG00000112773	754.556	2201.31	-1.5275	7.8973e-64	7.86e-62	FAM46A	protein_coding	family with sequence similarity 46, member A [Source:HGNC Symbol;Acc:18345]	2423	1942	785	758	36.9425	35.7794	12.9871	13.4079
ENSG00000149577	190.757	574.159	-1.5269	7.5062e-20	1.5031e-18	SIDT2	protein_coding	SID1 transmembrane family, member 2 [Source:HGNC Symbol;Acc:24272]	611	524	178	211	23.2367	24.081	7.34551	9.3097
ENSG00000260802	0	18.8936	-1.5266	0.00022376	0.000949	RP6-170F5.2	lincRNA	-	24	14	0	0	0.518226	0.365297	0	0
ENSG00000224596	60.0051	195.993	-1.5241	5.67e-09	4.888e-08	ZMIZ1-AS1	antisense	ZMIZ1 antisense RNA 1 [Source:HGNC Symbol;Acc:27433]	188	196	68	55	5.52375	6.95894	2.16797	1.87482
ENSG00000123700	65.0837	208.862	-1.5232	9.0569e-10	8.5677e-09	KCNJ2	protein_coding	potassium inwardly-rectifying channel, subfamily J, member 2 [Source:HGNC Symbol;Acc:6263]	217	195	66	67	3.31132	3.59572	1.09283	1.18614
ENSG00000172548	1.48104	23.3408	-1.5224	0.00034181	0.0013942	NIPAL4	protein_coding	NIPA-like domain containing 4 [Source:HGNC Symbol;Acc:28018]	24	22	1	2	0.878105	0.972677	0.0397012	0.0848956
ENSG00000114315	505.46	1474.05	-1.5199	8.5609e-46	4.9752e-44	HES1	protein_coding	hairy and enhancer of split 1, (Drosophila) [Source:HGNC Symbol;Acc:5192]	1635	1290	533	501	68.2346	65.0561	24.137	24.2574
ENSG00000180071	0.502538	20.2842	-1.5174	0.00029255	0.0012111	ANKRD18A	protein_coding	ankyrin repeat domain 18A [Source:HGNC Symbol;Acc:23643]	21	19	0	1	0.686484	0.750543	0	0.0379255
ENSG00000018408	585.862	1704.12	-1.5174	1.1108e-46	6.8128e-45	WWTR1	protein_coding	WW domain containing transcription regulator 1 [Source:HGNC Symbol;Acc:24042]	1869	1509	571	625	76.0606	74.208	25.2148	29.5087
ENSG00000117461	627.036	1820.53	-1.5164	1.4171e-49	9.6533e-48	PIK3R3	protein_coding	phosphoinositide-3-kinase, regulatory subunit 3 (gamma) [Source:HGNC Symbol;Acc:8981]	2052	1566	629	652	32.8244	30.2706	10.9179	12.1
ENSG00000074410	3144.32	9031.42	-1.5157	4.2182e-159	2.2616e-156	CA12	protein_coding	carbonic anhydrase XII [Source:HGNC Symbol;Acc:1371]	9878	8020	3274	3156	238.999	234.484	85.9558	88.5899
ENSG00000182580	5.36847	34.9183	-1.5126	0.00032069	0.0013174	EPHB3	protein_coding	EPH receptor B3 [Source:HGNC Symbol;Acc:3394]	37	32	6	5	1.15166	1.2036	0.202648	0.180556
ENSG00000161249	6.37355	38.2502	-1.5094	0.0002984	0.0012327	DMKN	protein_coding	dermokine [Source:HGNC Symbol;Acc:25063]	49	28	6	7	3.38818	2.33959	0.450185	0.56155
ENSG00000198774	18.5915	74.0927	-1.5075	3.5625e-05	0.00017644	RASSF9	protein_coding	Ras association (RalGDS/AF-6) domain family (N-terminal) member 9 [Source:HGNC Symbol;Acc:15739]	94	55	19	19	2.78002	1.9656	0.609738	0.65192
ENSG00000155660	3470.49	9886.57	-1.5038	1.0332e-156	5.3666e-154	PDIA4	protein_coding	protein disulfide isomerase family A, member 4 [Source:HGNC Symbol;Acc:30167]	10875	8728	3708	3394	431.195	418.186	159.534	156.126
ENSG00000159200	1775.39	5064.86	-1.5034	2.5256e-114	6.8818e-112	RCAN1	protein_coding	regulator of calcineurin 1 [Source:HGNC Symbol;Acc:3040]	5520	4514	1856	1775	149.348	147.582	54.4889	55.7159
ENSG00000183044	10.3407	49.7365	-1.5015	0.00017582	0.00076161	ABAT	protein_coding	4-aminobutyrate aminotransferase [Source:HGNC Symbol;Acc:23]	57	42	8	13	1.85545	1.6521	0.282575	0.490951
ENSG00000249568	0	18.4307	-1.5015	0.0002742	0.0011408	RP11-234O6.2	antisense	-	23	14	0	0	0.437352	0.321693	0	0
ENSG00000115414	28732.6	81587.9	-1.5002	5.0252e-189	4.6402e-186	FN1	protein_coding	fibronectin 1 [Source:HGNC Symbol;Acc:3778]	88933	72703	31677	27173	1091.52	1078.28	421.873	386.925
ENSG00000205542	9392.71	26652.2	-1.5001	3.4782e-218	4.1294e-215	TMSB4X	protein_coding	thymosin beta 4, X-linked [Source:HGNC Symbol;Acc:11881]	29271	23567	9691	9512	1760.28	1712.62	632.387	663.647
ENSG00000113369	848.6	2424.46	-1.4977	4.0645e-63	3.9739e-61	ARRDC3	protein_coding	arrestin domain containing 3 [Source:HGNC Symbol;Acc:29263]	2552	2236	858	876	128.321	135.863	46.8138	51.1024
ENSG00000110881	44.0592	145.323	-1.4977	1.6338e-07	1.1782e-06	ASIC1	protein_coding	acid-sensing (proton-gated) ion channel 1 [Source:HGNC Symbol;Acc:100]	153	134	44	46	3.86822	4.09389	1.2071	1.34927
ENSG00000153832	31.9475	112.167	-1.4955	3.5139e-06	2.0601e-05	FBXO36	protein_coding	F-box protein 36 [Source:HGNC Symbol;Acc:27020]	109	111	27	38	2.64675	3.25702	0.711409	1.07051
ENSG00000027697	1116.73	3176.16	-1.4952	3.0126e-82	4.552e-80	IFNGR1	protein_coding	interferon gamma receptor 1 [Source:HGNC Symbol;Acc:5439]	3418	2867	1188	1097	162.629	164.841	61.3354	60.5553
ENSG00000172638	18.1953	72.1496	-1.4932	4.7346e-05	0.00022943	EFEMP2	protein_coding	EGF containing fibulin-like extracellular matrix protein 2 [Source:HGNC Symbol;Acc:3219]	85	59	15	22	4.58113	3.84252	0.877231	1.37561
ENSG00000198121	230.318	670.564	-1.4923	8.5867e-23	2.013e-21	LPAR1	protein_coding	lysophosphatidic acid receptor 1 [Source:HGNC Symbol;Acc:3166]	764	570	240	231	16.5764	14.9445	5.65037	5.81472
ENSG00000153404	7.77487	41.6785	-1.4889	0.00029734	0.0012291	PLEKHG4B	protein_coding	pleckstrin homology domain containing, family G (with RhoGef domain) member 4B [Source:HGNC Symbol;Acc:29399]	48	35	10	6	0.517089	0.45562	0.116894	0.0749886
ENSG00000091490	1270.51	3594.63	-1.4879	7.0999e-85	1.1239e-82	SEL1L3	protein_coding	sel-1 suppressor of lin-12-like 3 (C. elegans) [Source:HGNC Symbol;Acc:29108]	3832	3275	1377	1224	131.141	135.437	51.1349	48.5977
ENSG00000236453	135.932	402.709	-1.4873	2.8661e-15	4.3466e-14	AC003092.1	lincRNA	-	458	343	142	136	35.7939	32.3928	12.0421	12.3311
ENSG00000166831	6.40012	37.5119	-1.4868	0.00036905	0.0014914	RBPMS2	protein_coding	RNA binding protein with multiple splicing 2 [Source:HGNC Symbol;Acc:19098]	39	35	5	8	1.12207	1.21685	0.156098	0.267034
ENSG00000077942	1052.91	2979.8	-1.4865	1.1102e-73	1.3874e-71	FBLN1	protein_coding	fibulin 1 [Source:HGNC Symbol;Acc:3600]	3228	2672	1150	1006	146.122	146.16	56.4869	52.8322
ENSG00000106733	31.4981	110.035	-1.4844	4.9665e-06	2.8367e-05	NMRK1	protein_coding	nicotinamide riboside kinase 1 [Source:HGNC Symbol;Acc:26057]	114	103	25	39	5.2981	5.78447	1.26074	2.10281
ENSG00000099219	687.674	1946.96	-1.4827	4.1638e-53	3.2491e-51	ERMP1	protein_coding	endoplasmic reticulum metallopeptidase 1 [Source:HGNC Symbol;Acc:23703]	2181	1686	711	695	37.8354	35.3436	13.3838	13.9877
ENSG00000125354	203.845	591.008	-1.4816	6.239e-21	1.3193e-19	2018-09-06	protein_coding	septin 6 [Source:HGNC Symbol;Acc:15848]	657	516	215	202	15.7971	14.9924	5.60944	5.63486
ENSG00000114554	3593.83	10103.5	-1.4814	3.2181e-105	7.3272e-103	PLXNA1	protein_coding	plexin A1 [Source:HGNC Symbol;Acc:9099]	10969	9040	4059	3307	125.901	125.384	50.5533	44.0368
ENSG00000161513	121.622	368.09	-1.4811	1.1695e-11	1.3332e-10	FDXR	protein_coding	ferredoxin reductase [Source:HGNC Symbol;Acc:3642]	346	374	151	99	12.8775	16.8204	6.09818	4.27474
ENSG00000233621	45.0642	147.922	-1.4803	3.6842e-07	2.5251e-06	RP11-422J8.1	antisense	-	137	152	44	48	5.30356	7.11053	1.84829	2.1558
ENSG00000000971	823.133	2321.8	-1.4796	2.7132e-59	2.4245e-57	CFH	protein_coding	complement factor H [Source:HGNC Symbol;Acc:4883]	2586	2023	833	849	53.4046	50.4843	18.6665	20.3412
ENSG00000066248	6.24068	40.1021	-1.4789	0.00045509	0.0018091	NGEF	protein_coding	neuronal guanine nucleotide exchange factor [Source:HGNC Symbol;Acc:7807]	53	28	11	2	2.64283	1.68718	0.595189	0.115703
ENSG00000171174	20.1523	78.3626	-1.4769	5.1347e-05	0.00024737	RBKS	protein_coding	ribokinase [Source:HGNC Symbol;Acc:30325]	66	86	17	24	2.53321	3.98875	0.70802	1.06871
ENSG00000137959	82.245	252.861	-1.476	7.9395e-10	7.545e-09	IFI44L	protein_coding	interferon-induced protein 44-like [Source:HGNC Symbol;Acc:17817]	252	245	101	68	9.71368	11.412	4.22448	3.04097
ENSG00000091428	2.98865	28.0633	-1.4753	0.00054627	0.0021389	RAPGEF4	protein_coding	Rap guanine nucleotide exchange factor (GEF) 4 [Source:HGNC Symbol;Acc:16626]	33	23	1	5	0.867631	0.730735	0.0285292	0.152514
ENSG00000117318	880.582	2487.61	-1.475	4.106e-46	2.4549e-44	ID3	protein_coding	inhibitor of DNA binding 3, dominant negative helix-loop-helix protein [Source:HGNC Symbol;Acc:5362]	2704	2223	1035	772	158.379	157.341	65.7809	52.46
ENSG00000143595	0	18.8971	-1.4723	0.00034284	0.0013977	AQP10	protein_coding	aquaporin 10 [Source:HGNC Symbol;Acc:16029]	12	24	0	0	0.393946	0.952089	0	0
ENSG00000251144	38.8212	131.147	-1.4717	2.4986e-06	1.4957e-05	CTD-2532K18.2	lincRNA	-	156	106	52	28	29.3538	24.1022	10.6172	6.11248
ENSG00000150556	83.7526	254.615	-1.4704	3.3044e-10	3.2751e-09	LYPD6B	protein_coding	LY6/PLAUR domain containing 6B [Source:HGNC Symbol;Acc:27018]	275	229	101	71	15.9345	16.0344	6.35033	4.77292
ENSG00000119938	94.5692	287.509	-1.4696	2.9311e-10	2.9165e-09	PPP1R3C	protein_coding	protein phosphatase 1, regulatory subunit 3C [Source:HGNC Symbol;Acc:9293]	262	299	110	84	5.60575	7.73062	2.55384	2.08512
ENSG00000143382	45.2479	147.177	-1.4689	4.3059e-07	2.914e-06	ADAMTSL4	protein_coding	ADAMTS-like 4 [Source:HGNC Symbol;Acc:19706]	151	139	56	37	2.60112	2.89341	1.04675	0.739445
ENSG00000142661	7.77487	40.9385	-1.4679	0.00036733	0.0014862	MYOM3	protein_coding	myomesin 3 [Source:HGNC Symbol;Acc:26679]	44	37	10	6	0.511881	0.52015	0.126237	0.0809818
ENSG00000258486	985.578	4197.98	-1.4654	0.00016878	0.00073362	RN7SL1	antisense	RNA, 7SL, cytoplasmic 1 [Source:HGNC Symbol;Acc:10038]	3776	4407	677	1320	679.723	958.637	132.239	275.673
ENSG00000205755	2.96208	26.7674	-1.4653	0.00059565	0.0023131	CRLF2	protein_coding	cytokine receptor-like factor 2 [Source:HGNC Symbol;Acc:14281]	29	24	2	4	1.90988	1.90998	0.142924	0.305624
ENSG00000162591	24.8588	89.5683	-1.463	2.0673e-05	0.00010671	MEGF6	protein_coding	multiple EGF-like-domains 6 [Source:HGNC Symbol;Acc:3232]	83	92	29	22	1.75501	2.35071	0.665377	0.539689
ENSG00000229644	111.759	328.986	-1.4613	1.0331e-12	1.283e-11	NAMPTL	protein_coding	nicotinamide phosphoribosyltransferase-like [Source:HGNC Symbol;Acc:17633]	366	287	125	104	12.5176	11.8613	4.63894	4.1266
ENSG00000140379	8.01403	49.0859	-1.4609	0.00053054	0.0020812	BCL2A1	protein_coding	BCL2-related protein A1 [Source:HGNC Symbol;Acc:991]	64	35	1	15	3.75268	2.47994	0.0636255	1.02041
ENSG00000153029	235.686	669.731	-1.4589	4.3705e-22	9.8033e-21	MR1	protein_coding	major histocompatibility complex, class I-related [Source:HGNC Symbol;Acc:4975]	761	571	246	236	18.9823	17.2112	6.65837	6.82961
ENSG00000204642	78.2536	235.344	-1.456	7.7461e-10	7.3697e-09	HLA-F	protein_coding	major histocompatibility complex, class I, F [Source:HGNC Symbol;Acc:4963]	273	196	81	79	15.47	13.4213	4.98061	5.19369
ENSG00000111319	10.3141	48.4439	-1.4536	0.00031074	0.0012775	SCNN1A	protein_coding	sodium channel, non-voltage-gated 1 alpha subunit [Source:HGNC Symbol;Acc:10599]	41	53	9	12	1.8119	2.83033	0.43158	0.61525
ENSG00000105514	259.298	734.108	-1.4516	9.4569e-22	2.0847e-20	RAB3D	protein_coding	RAB3D, member RAS oncogene family [Source:HGNC Symbol;Acc:9779]	810	646	303	229	16.8306	16.2203	6.83167	5.5204
ENSG00000137767	260.492	734.562	-1.4513	2.9528e-23	7.0515e-22	SQRDL	protein_coding	sulfide quinone reductase-like (yeast) [Source:HGNC Symbol;Acc:20390]	841	621	277	256	49.4199	44.0969	17.6626	17.4528
ENSG00000129667	340.591	959.166	-1.4508	1.6287e-24	4.1329e-23	RHBDF2	protein_coding	rhomboid 5 homolog 2 (Drosophila) [Source:HGNC Symbol;Acc:20788]	1092	816	402	297	44.507	40.1889	17.7787	14.0437
ENSG00000110697	607.662	1696.62	-1.449	3.806e-32	1.3692e-30	PITPNM1	protein_coding	phosphatidylinositol transfer protein, membrane-associated 1 [Source:HGNC Symbol;Acc:9003]	1854	1508	734	514	71.516	70.292	30.7226	23.0026
ENSG00000243646	71.8535	216.359	-1.4489	2.4384e-09	2.1955e-08	IL10RB	protein_coding	interleukin 10 receptor, beta [Source:HGNC Symbol;Acc:5965]	244	186	76	71	10.6179	9.78078	3.58866	3.5845
ENSG00000162676	11.6889	51.0341	-1.4459	0.00024752	0.0010381	GFI1	protein_coding	growth factor independent 1 transcription repressor [Source:HGNC Symbol;Acc:4237]	55	46	14	10	1.34398	1.35831	0.371216	0.283498
ENSG00000103647	29.8576	101.237	-1.4455	8.8903e-06	4.901e-05	CORO2B	protein_coding	coronin, actin binding protein, 2B [Source:HGNC Symbol;Acc:2256]	101	98	30	31	1.5796	1.85209	0.509114	0.562479
ENSG00000121741	391.215	1087.75	-1.4451	2.6151e-33	9.8562e-32	ZMYM2	protein_coding	zinc finger, MYM-type 2 [Source:HGNC Symbol;Acc:12989]	1150	999	407	393	19.4622	20.4301	7.47409	7.71627
ENSG00000100100	59.0001	181.26	-1.4449	3.7944e-08	2.9875e-07	PIK3IP1	protein_coding	phosphoinositide-3-kinase interacting protein 1 [Source:HGNC Symbol;Acc:24942]	191	167	68	53	5.60579	5.92285	2.16562	1.80468
ENSG00000134757	1.45447	21.8573	-1.4421	0.00066489	0.0025546	DSG3	protein_coding	desmoglein 3 [Source:HGNC Symbol;Acc:3050]	28	16	2	1	0.273683	0.188982	0.0212123	0.0113399
ENSG00000149260	39.6692	127.634	-1.4392	1.621e-06	1.0027e-05	CAPN5	protein_coding	calpain 5 [Source:HGNC Symbol;Acc:1482]	128	123	39	42	3.5142	4.08068	1.16185	1.33779
ENSG00000096968	176.71	502.295	-1.4385	2.1639e-16	3.5646e-15	JAK2	protein_coding	Janus kinase 2 [Source:HGNC Symbol;Acc:6192]	499	488	196	166	10.1307	11.9721	4.31782	3.90992
ENSG00000184735	0.475964	18.9883	-1.4375	0.00055207	0.002159	DDX53	protein_coding	DEAD (Asp-Glu-Ala-Asp) box polypeptide 53 [Source:HGNC Symbol;Acc:20083]	17	20	1	0	0.433455	0.616221	0.0276672	0
ENSG00000181284	27.3981	94.191	-1.4363	1.9688e-05	0.0001021	TMEM102	protein_coding	transmembrane protein 102 [Source:HGNC Symbol;Acc:26722]	117	72	28	28	3.21057	2.38748	0.833726	0.891404
ENSG00000157601	46.9947	146.805	-1.4353	3.8849e-07	2.6518e-06	MX1	protein_coding	myxovirus (influenza virus) resistance 1, interferon-inducible protein p78 (mouse) [Source:HGNC Symbol;Acc:7532]	155	135	47	49	6.27006	6.5991	2.06304	2.29962
ENSG00000106330	89.6767	263.506	-1.4342	2.6613e-10	2.6694e-09	MOSPD3	protein_coding	motile sperm domain containing 3 [Source:HGNC Symbol;Acc:25078]	287	235	105	79	16.2976	16.1257	6.46993	5.20461
ENSG00000142910	220.533	617.122	-1.4339	5.0268e-20	1.0164e-18	TINAGL1	protein_coding	tubulointerstitial nephritis antigen-like 1 [Source:HGNC Symbol;Acc:19168]	705	523	230	221	25.0147	22.4243	8.85531	9.09744
ENSG00000162745	21.9233	78.7274	-1.4336	4.7571e-05	0.00023038	OLFML2B	protein_coding	olfactomedin-like 2B [Source:HGNC Symbol;Acc:24558]	86	70	26	19	2.88287	2.83553	0.945732	0.738924
ENSG00000179456	40.0654	127.726	-1.4319	1.5295e-06	9.5213e-06	ZBTB18	protein_coding	zinc finger and BTB domain containing 18 [Source:HGNC Symbol;Acc:13030]	133	119	43	39	1.86509	2.01653	0.654313	0.634501
ENSG00000179583	10.8432	48.6264	-1.4316	0.00035569	0.0014437	CIITA	protein_coding	class II, major histocompatibility complex, transactivator [Source:HGNC Symbol;Acc:7067]	51	45	8	14	1.19539	1.27457	0.203469	0.380704
ENSG00000166104	15.1269	60.4844	-1.4315	0.00017395	0.00075431	RP11-299H22.3	pseudogene	-	55	63	17	14	1.80011	2.49166	0.603748	0.531601
ENSG00000179715	45.4871	142.172	-1.4313	5.468e-07	3.6412e-06	PCED1B	protein_coding	PC-esterase domain containing 1B [Source:HGNC Symbol;Acc:28255]	157	125	47	46	7.13682	6.86635	2.31831	2.42596
ENSG00000165633	0	17.1347	-1.4295	0.00048306	0.0019107	VSTM4	protein_coding	V-set and transmembrane domain containing 4 [Source:HGNC Symbol;Acc:26470]	19	15	0	0	0.612942	0.584747	0	0
ENSG00000204531	31.5247	105.865	-1.4281	1.4672e-05	7.7787e-05	POU5F1	protein_coding	POU class 5 homeobox 1 [Source:HGNC Symbol;Acc:9221]	117	93	24	40	3.67349	3.52847	0.817661	1.45705
ENSG00000136425	1.957	22.692	-1.4264	0.0008013	0.0030255	CIB2	protein_coding	calcium and integrin binding family member 2 [Source:HGNC Symbol;Acc:24579]	25	20	2	2	1.65452	1.59946	0.143625	0.153561
ENSG00000167996	8429.28	22744	-1.425	1.127e-130	4.2574e-128	FTH1	protein_coding	ferritin, heavy polypeptide 1 [Source:HGNC Symbol;Acc:3976]	24027	20904	9372	7897	1682.93	1769.32	712.309	641.725
ENSG00000090238	50.8024	156.534	-1.4221	3.4695e-07	2.3859e-06	YPEL3	protein_coding	yippee-like 3 (Drosophila) [Source:HGNC Symbol;Acc:18327]	152	155	55	49	8.5684	10.5584	3.36425	3.20459
ENSG00000147697	12.3509	53.0718	-1.422	0.00033835	0.0013824	GSDMC	protein_coding	gasdermin C [Source:HGNC Symbol;Acc:7151]	57	48	8	17	2.21135	2.25027	0.336776	0.765158
ENSG00000180739	9.7053	45.0139	-1.42	0.00046411	0.0018437	S1PR5	protein_coding	sphingosine-1-phosphate receptor 5 [Source:HGNC Symbol;Acc:14299]	48	41	13	7	1.58931	1.64045	0.467068	0.268897
ENSG00000157873	23.9866	83.8252	-1.4196	4.326e-05	0.00021055	TNFRSF14	protein_coding	tumor necrosis factor receptor superfamily, member 14 [Source:HGNC Symbol;Acc:11912]	79	85	24	25	3.36722	4.37799	1.11001	1.23625
ENSG00000021762	274.164	754.404	-1.4184	8.9782e-24	2.1753e-22	OSBPL5	protein_coding	oxysterol binding protein-like 5 [Source:HGNC Symbol;Acc:16392]	789	700	292	269	27.1048	29.0588	10.8848	10.7211
ENSG00000064655	3.99373	30.4728	-1.4152	0.0009074	0.0033808	EYA2	protein_coding	eyes absent homolog 2 (Drosophila) [Source:HGNC Symbol;Acc:3520]	31	29	1	7	1.387	1.56792	0.0485493	0.363356
ENSG00000259207	122.257	348.257	-1.415	5.3753e-12	6.2873e-11	ITGB3	protein_coding	integrin, beta 3 (platelet glycoprotein IIIa, antigen CD61) [Source:HGNC Symbol;Acc:6156]	368	320	146	105	8.97618	9.43202	3.86425	2.97135
ENSG00000095752	177.107	493.661	-1.4144	4.8555e-16	7.7525e-15	IL11	protein_coding	interleukin 11 [Source:HGNC Symbol;Acc:5966]	562	420	200	163	23.5271	21.2467	9.08512	7.91661
ENSG00000105983	518.737	1404.6	-1.4138	8.7881e-40	4.271e-38	LMBR1	protein_coding	limb region 1 homolog (mouse) [Source:HGNC Symbol;Acc:13243]	1491	1285	544	517	48.7995	50.822	19.3199	19.6313
ENSG00000198910	126.306	356.311	-1.4134	5.2982e-13	6.7018e-12	L1CAM	protein_coding	L1 cell adhesion molecule [Source:HGNC Symbol;Acc:6470]	389	317	126	132	10.0948	9.94076	3.54804	3.97414
ENSG00000141738	1.00508	20.7455	-1.4126	0.00076201	0.0028943	GRB7	protein_coding	growth factor receptor-bound protein 7 [Source:HGNC Symbol;Acc:4567]	28	14	0	2	1.23942	0.74886	0	0.10271
ENSG00000175198	137.942	386.879	-1.4116	5.9285e-14	8.1503e-13	PCCA	protein_coding	propionyl CoA carboxylase, alpha polypeptide [Source:HGNC Symbol;Acc:8653]	413	352	142	140	17.1433	17.6562	6.3959	6.74205
ENSG00000165029	920.287	2472.89	-1.4109	3.0017e-60	2.7564e-58	ABCA1	protein_coding	ATP-binding cassette, sub-family A (ABC1), member 1 [Source:HGNC Symbol;Acc:29]	2647	2244	997	887	41.5423	42.5569	16.9786	16.1503
ENSG00000223850	1.48104	21.1172	-1.4102	0.00086397	0.0032335	AC010145.3	lincRNA	-	24	18	1	2	1.24743	1.13055	0.0563995	0.120602
ENSG00000166965	34.7501	111.329	-1.4101	6.353e-06	3.5698e-05	RCCD1	protein_coding	RCC1 domain containing 1 [Source:HGNC Symbol;Acc:30457]	124	97	35	36	4.03642	3.81555	1.23627	1.35956
ENSG00000173239	2.43297	23.8038	-1.4093	0.0009481	0.0035132	LIPM	protein_coding	lipase, family member M [Source:HGNC Symbol;Acc:23455]	25	22	3	2	0.93367	0.992857	0.121575	0.0866569
ENSG00000136048	933.73	2503.08	-1.4083	4.226e-60	3.8383e-58	DRAM1	protein_coding	DNA-damage regulated autophagy modulator 1 [Source:HGNC Symbol;Acc:25645]	2699	2255	945	963	123.836	125.027	47.0485	51.2615
ENSG00000160447	37.4199	119.945	-1.4074	6.5871e-06	3.6926e-05	PKN3	protein_coding	protein kinase N3 [Source:HGNC Symbol;Acc:17999]	127	110	48	29	4.35456	4.55769	1.78588	1.15361
ENSG00000011105	668.208	1794.81	-1.407	1.908e-48	1.2634e-46	TSPAN9	protein_coding	tetraspanin 9 [Source:HGNC Symbol;Acc:21640]	1934	1618	706	661	61.0776	61.7468	24.1935	24.2185
ENSG00000176659	0	16.8576	-1.407	0.00057287	0.0022315	C20orf197	protein_coding	chromosome 20 open reading frame 197 [Source:HGNC Symbol;Acc:26601]	16	17	0	0	0.316272	0.40607	0	0
ENSG00000163219	16.1586	61.3139	-1.4058	0.00018631	0.00080391	ARHGAP25	protein_coding	Rho GTPase activating protein 25 [Source:HGNC Symbol;Acc:28951]	70	52	16	17	2.42479	2.17665	0.601401	0.683194
ENSG00000197879	211.219	585.367	-1.405	5.6854e-16	9.0256e-15	MYO1C	protein_coding	myosin IC [Source:HGNC Symbol;Acc:7597]	622	535	259	175	21.5183	22.3657	9.72271	7.02387
ENSG00000158315	14.6775	57.1473	-1.4027	0.00024305	0.0010224	RHBDL2	protein_coding	rhomboid, veinlet-like 2 (Drosophila) [Source:HGNC Symbol;Acc:16083]	61	52	15	15	2.04229	2.10378	0.544938	0.582637
ENSG00000136156	1659.78	4418.65	-1.4024	1.2794e-79	1.8653e-77	ITM2B	protein_coding	integral membrane protein 2B [Source:HGNC Symbol;Acc:6174]	4811	3942	1649	1741	241.909	239.522	89.9719	101.563
ENSG00000260265	1.90386	25.2821	-1.3988	0.00095431	0.0035323	RP11-44F21.5	lincRNA	-	39	13	4	0	3.9589	1.59465	0.440594	0
ENSG00000003400	110.228	310.562	-1.3971	2.9566e-11	3.2415e-10	CASP10	protein_coding	caspase 10, apoptosis-related cysteine peptidase [Source:HGNC Symbol;Acc:1500]	319	293	107	118	8.21512	9.11804	2.99003	3.52554
ENSG00000164683	41.3605	128.929	-1.397	3.4817e-06	2.042e-05	HEY1	protein_coding	hairy/enhancer-of-split related with YRPW motif 1 [Source:HGNC Symbol;Acc:4880]	138	117	51	34	5.98592	6.13266	2.40044	1.711
ENSG00000166444	245.867	670.779	-1.3968	2.0127e-19	3.908e-18	ST5	protein_coding	suppression of tumorigenicity 5 [Source:HGNC Symbol;Acc:11350]	660	657	260	243	34.875	41.9514	14.9078	14.8969
ENSG00000182240	131.303	366.135	-1.3962	7.6266e-13	9.5525e-12	BACE2	protein_coding	beta-site APP-cleaving enzyme 2 [Source:HGNC Symbol;Acc:934]	379	343	146	123	13.2389	14.4783	5.53393	4.98468
ENSG00000203306	84.4943	241.647	-1.3957	1.3045e-09	1.2052e-08	AP001007.1	pseudogene	-	265	214	92	81	7.03931	6.86924	2.6518	2.49626
ENSG00000168461	1961.03	5191.77	-1.3951	9.8808e-85	1.5493e-82	RAB31	protein_coding	RAB31, member RAS oncogene family [Source:HGNC Symbol;Acc:9771]	5602	4674	1943	2062	388.853	392.05	146.347	166.054
ENSG00000007516	6.26726	35.6583	-1.395	0.0009322	0.0034624	BAIAP3	protein_coding	BAI1-associated protein 3 [Source:HGNC Symbol;Acc:948]	41	30	10	3	0.999161	0.883454	0.264436	0.084819
ENSG00000251191	0.978502	19.2654	-1.395	0.00089068	0.0033245	LINC00589	lincRNA	long intergenic non-protein coding RNA 589 [Source:HGNC Symbol;Acc:32299]	20	18	1	1	0.922347	1.00311	0.0500419	0.0535038
ENSG00000116983	6.40012	34.9165	-1.3941	0.00090292	0.0033656	HPCAL4	protein_coding	hippocalcin like 4 [Source:HGNC Symbol;Acc:18212]	43	27	5	8	0.478202	0.362842	0.0603367	0.103217
ENSG00000228695	40.9666	130.225	-1.3931	1.1203e-05	6.0476e-05	CES1P1	pseudogene	carboxylesterase 1 pseudogene 1 [Source:HGNC Symbol;Acc:18546]	142	116	28	55	5.38518	5.31594	1.15223	2.41988
ENSG00000100968	2.37982	112.718	-1.3916	0.00065268	0.0025135	NFATC4	protein_coding	nuclear factor of activated T-cells, cytoplasmic, calcineurin-dependent 4 [Source:HGNC Symbol;Acc:7778]	127	97	5	0	2.38554	2.20174	0.101911	0
ENSG00000143416	60.0583	179.045	-1.3906	3.1667e-07	2.1958e-06	SELENBP1	protein_coding	selenium binding protein 1 [Source:HGNC Symbol;Acc:10719]	161	188	66	57	6.28219	8.8645	2.79446	2.58036
ENSG00000100092	95.6009	270.545	-1.3906	3.3605e-10	3.3287e-09	SH3BP1	protein_coding	SH3-domain binding protein 1 [Source:HGNC Symbol;Acc:10824]	295	241	109	87	8.5789	8.4691	3.43958	2.93528
ENSG00000170442	14.7307	56.9614	-1.3906	0.00029061	0.0012043	KRT86	protein_coding	keratin 86 [Source:HGNC Symbol;Acc:6463]	63	50	13	17	2.12241	2.03549	0.475226	0.664442
ENSG00000165312	400.712	1071.71	-1.3894	7.0514e-29	2.1825e-27	OTUD1	protein_coding	OTU domain containing 1 [Source:HGNC Symbol;Acc:27346]	1173	951	390	428	20.362	19.9486	7.34607	8.61956
ENSG00000227158	1.42789	22.3237	-1.3889	0.00098973	0.0036435	AC073621.2	pseudogene	-	17	26	3	0	0.896542	1.65694	0.171677	0
ENSG00000225339	558.616	1483.31	-1.3876	5.393e-40	2.652e-38	RP11-513I15.6	lincRNA	-	1637	1305	594	549	29.1858	28.1154	11.4915	11.3557
ENSG00000128266	16.2117	61.3174	-1.3873	0.00025423	0.0010635	GNAZ	protein_coding	guanine nucleotide binding protein (G protein), alpha z polypeptide [Source:HGNC Symbol;Acc:4395]	58	62	14	19	2.05525	2.65484	0.538311	0.781106
ENSG00000102805	285.694	767.534	-1.3847	5.7277e-22	1.2778e-20	CLN5	protein_coding	ceroid-lipofuscinosis, neuronal 5 [Source:HGNC Symbol;Acc:2076]	881	647	312	273	19.9484	17.7031	7.66579	7.1716
ENSG00000104140	5.89759	32.9735	-1.3847	0.0010152	0.0037283	RHOV	protein_coding	ras homolog family member V [Source:HGNC Symbol;Acc:18313]	34	31	5	7	1.0769	1.18651	0.171845	0.257226
ENSG00000254122	59.3697	175.798	-1.3845	3.111e-07	2.1635e-06	PCDHGB7	protein_coding	protocadherin gamma subfamily B, 7 [Source:HGNC Symbol;Acc:8714]	178	168	73	49	2.09152	2.3854	0.930751	0.667971
ENSG00000178075	10.7635	46.0311	-1.3842	0.00056259	0.0021945	GRAMD1C	protein_coding	GRAM domain containing 1C [Source:HGNC Symbol;Acc:25252]	55	37	11	11	1.89425	1.53988	0.41109	0.43953
ENSG00000254429	17.9827	66.0365	-1.3839	0.00020676	0.00088253	CTD-2562J17.7	antisense	-	79	53	23	14	8.43137	6.8353	2.66359	1.73348
ENSG00000224945	6.34698	34.2712	-1.3831	0.00098661	0.0036344	RP11-82L18.2	sense_intronic	-	32	35	7	6	2.95909	3.911	0.702386	0.643695
ENSG00000124216	67.78	196.443	-1.3814	6.814e-08	5.1644e-07	SNAI1	protein_coding	snail homolog 1 (Drosophila) [Source:HGNC Symbol;Acc:11128]	231	161	78	61	7.39905	6.23161	2.71099	2.2668
ENSG00000141622	0.951928	19.6354	-1.3808	0.00097615	0.0035999	RNF165	protein_coding	ring finger protein 165 [Source:HGNC Symbol;Acc:31696]	22	17	2	0	0.359914	0.336075	0.0355038	0
ENSG00000141314	0.502538	18.2448	-1.3788	0.00086661	0.0032419	RHBDL3	protein_coding	rhomboid, veinlet-like 3 (Drosophila) [Source:HGNC Symbol;Acc:16502]	25	12	0	1	0.565837	0.328203	0	0.0262586
ENSG00000255509	22.9549	78.0769	-1.3777	9.0348e-05	0.00041548	RP11-445F12.1	antisense	-	93	63	25	22	6.21574	5.08817	1.81309	1.7059
ENSG00000166206	3.99373	29.6398	-1.377	0.0012504	0.0045104	GABRB3	protein_coding	gamma-aminobutyric acid (GABA) A receptor, beta 3 [Source:HGNC Symbol;Acc:4083]	28	30	1	7	0.720046	0.932254	0.0279043	0.208843
ENSG00000080546	165.5	449.017	-1.3744	2.2856e-14	3.2195e-13	SESN1	protein_coding	sestrin 1 [Source:HGNC Symbol;Acc:21595]	516	378	164	174	16.8986	14.959	5.82792	6.61104
ENSG00000138039	0	16.4876	-1.3738	0.00073346	0.0027954	LHCGR	protein_coding	luteinizing hormone/choriogonadotropin receptor [Source:HGNC Symbol;Acc:6585]	14	18	0	0	0.424746	0.65991	0	0
ENSG00000169851	999.283	2613	-1.3732	5.1403e-59	4.5205e-57	PCDH7	protein_coding	protocadherin 7 [Source:HGNC Symbol;Acc:8659]	2904	2282	1069	976	54.9111	52.1422	21.9336	21.4108
ENSG00000122971	39.8818	123.65	-1.3728	1.0761e-05	5.8258e-05	ACADS	protein_coding	acyl-CoA dehydrogenase, C-2 to C-3 short chain [Source:HGNC Symbol;Acc:90]	129	115	31	50	4.6536	5.01312	1.21347	2.09262
ENSG00000165389	867.593	2270.12	-1.371	8.8856e-47	5.4699e-45	SPTSSA	protein_coding	serine palmitoyltransferase, small subunit A [Source:HGNC Symbol;Acc:20361]	2496	2005	843	928	48.5389	47.1163	17.7886	20.937
ENSG00000131981	283.659	752.547	-1.3689	9.1865e-23	2.1505e-21	LGALS3	protein_coding	lectin, galactoside-binding, soluble, 3 [Source:HGNC Symbol;Acc:6563]	803	685	294	286	52.0585	53.6634	20.682	21.5111
ENSG00000221866	11.3458	47.9793	-1.3676	0.00067291	0.0025842	PLXNA4	protein_coding	plexin A4 [Source:HGNC Symbol;Acc:9102]	46	48	8	15	0.379145	0.478079	0.0715495	0.143436
ENSG00000245648	12.8002	51.6847	-1.3675	0.0005453	0.0021364	RP11-277P12.20	antisense	-	48	53	10	16	0.91596	1.22214	0.207064	0.354222
ENSG00000134602	44.2452	133.465	-1.3652	5.0247e-06	2.866e-05	MST4	protein_coding	Serine/threonine-protein kinase MST4 [Source:UniProtKB/Swiss-Prot;Acc:Q9P289]	149	116	37	53	3.21732	3.02675	0.866919	1.32771
ENSG00000088826	398.775	1050.05	-1.3649	9.2076e-28	2.6662e-26	SMOX	protein_coding	spermine oxidase [Source:HGNC Symbol;Acc:15862]	1095	977	444	373	43.1319	46.5039	18.9774	17.0456
ENSG00000101187	922.501	2409.09	-1.3647	8.0869e-43	4.3499e-41	SLCO4A1	protein_coding	solute carrier organic anion transporter family, member 4A1 [Source:HGNC Symbol;Acc:10953]	2538	2220	1065	827	96.8627	102.383	44.1046	36.6177
ENSG00000247400	21.4739	73.2614	-1.3627	0.00013728	0.00060685	DNAJC3-AS1	processed_transcript	DNAJC3 antisense RNA 1 (head to head) [Source:HGNC Symbol;Acc:39808]	85	61	24	20	1.57851	1.36889	0.483623	0.430901
ENSG00000197587	4.94566	31.0304	-1.3624	0.0013587	0.0048608	DMBX1	protein_coding	diencephalon/mesencephalon homeobox 1 [Source:HGNC Symbol;Acc:19026]	25	35	3	7	0.468617	0.792788	0.0610195	0.152229
ENSG00000151773	27.9006	90.4942	-1.3622	5.4028e-05	0.00025894	CCDC122	protein_coding	coiled-coil domain containing 122 [Source:HGNC Symbol;Acc:26478]	85	92	28	29	2.46128	3.21915	0.879771	0.974228
ENSG00000110628	58.0481	167.919	-1.361	3.9307e-07	2.6797e-06	SLC22A18	protein_coding	solute carrier family 22, member 18 [Source:HGNC Symbol;Acc:10964]	191	143	66	53	9.35146	8.46044	3.50638	3.01052
ENSG00000019144	512.682	1338.66	-1.3605	1.1606e-34	4.6709e-33	PHLDB1	protein_coding	pleckstrin homology-like domain, family B, member 1 [Source:HGNC Symbol;Acc:23697]	1393	1248	526	522	30.6673	33.2009	12.5655	13.3326
ENSG00000267121	8.35713	38.992	-1.3592	0.0010053	0.0036958	CTD-2020K17.1	antisense	-	47	31	7	10	2.44289	1.94706	0.394796	0.603012
ENSG00000171931	0.978502	19.2671	-1.3585	0.0011639	0.0042286	FBXW10	protein_coding	F-box and WD repeat domain containing 10 [Source:HGNC Symbol;Acc:1211]	14	23	1	1	0.258655	0.513489	0.0200476	0.0214345
ENSG00000064547	21.0511	71.7796	-1.3577	0.00015617	0.00068324	LPAR2	protein_coding	lysophosphatidic acid receptor 2 [Source:HGNC Symbol;Acc:3168]	83	60	21	22	4.31819	3.77213	1.18553	1.3279
ENSG00000163932	337.999	892.212	-1.3575	8.4216e-21	1.7741e-19	PRKCD	protein_coding	protein kinase C, delta [Source:HGNC Symbol;Acc:9399]	981	788	405	289	40.6268	39.4349	18.1999	13.8855
ENSG00000260941	15.6029	57.7015	-1.3559	0.00037522	0.0015145	LINC00622	sense_overlapping	long intergenic non-protein coding RNA 622 [Source:HGNC Symbol;Acc:44251]	67	48	18	14	2.30461	1.99514	0.671836	0.558689
ENSG00000125730	7633.32	19593.6	-1.3552	1.283e-156	6.4622e-154	C3	protein_coding	complement component 3 [Source:HGNC Symbol;Acc:1318]	21534	17313	8235	7390	1330.56	1292.69	552.132	529.754
ENSG00000173599	999.435	2576.89	-1.3508	1.395e-51	1.017e-49	PC	protein_coding	pyruvate carboxylase [Source:HGNC Symbol;Acc:8636]	2796	2307	1120	928	95.3243	95.044	41.4337	36.7058
ENSG00000171357	3.91401	27.6038	-1.3502	0.0015521	0.0054875	LURAP1	protein_coding	leucine rich adaptor protein 1 [Source:HGNC Symbol;Acc:32327]	20	33	4	4	0.582561	1.16155	0.126427	0.135174
ENSG00000085871	94.5982	259.518	-1.3459	3.2458e-09	2.8696e-08	MGST2	protein_coding	microsomal glutathione S-transferase 2 [Source:HGNC Symbol;Acc:7063]	300	217	90	103	18.2444	15.947	5.93909	7.26718
ENSG00000263470	7.77487	37.4207	-1.3455	0.0012225	0.0044172	RP11-160O5.1	lincRNA	-	34	39	10	6	2.76524	3.83291	0.882516	0.566141
ENSG00000122870	31.6286	99.571	-1.3445	4.6126e-05	0.00022404	BICC1	protein_coding	bicaudal C homolog 1 (Drosophila) [Source:HGNC Symbol;Acc:19351]	95	100	39	26	1.91216	2.43227	0.851794	0.607147
ENSG00000184785	0.502538	18.0589	-1.3438	0.0011153	0.0040626	SMIM10	protein_coding	small integral membrane protein 10 [Source:HGNC Symbol;Acc:41913]	27	10	0	1	0.950517	0.425409	0	0.0408429
ENSG00000143995	234.336	616.592	-1.3435	2.9232e-17	5.0611e-16	MEIS1	protein_coding	Meis homeobox 1 [Source:HGNC Symbol;Acc:7000]	615	597	259	221	21.3308	25.0218	9.74769	8.89294
ENSG00000162144	1347.23	3448.33	-1.3426	3.0541e-61	2.8518e-59	CYB561A3	protein_coding	cytochrome b561 family, member A3 [Source:HGNC Symbol;Acc:23014]	3522	3270	1440	1317	128.081	143.699	56.8233	55.5649
ENSG00000120693	20.0992	69.0053	-1.3413	0.00023983	0.0010104	SMAD9	protein_coding	SMAD family member 9 [Source:HGNC Symbol;Acc:6774]	65	70	19	22	0.827298	1.07661	0.262404	0.324856
ENSG00000136244	1094.86	2793.42	-1.3391	3.0714e-60	2.8049e-58	IL6	protein_coding	interleukin 6 (interferon, beta 2) [Source:HGNC Symbol;Acc:6018]	3098	2445	1160	1080	181.653	173.241	73.8055	73.4693
ENSG00000117139	656.945	1681.7	-1.338	5.1238e-41	2.6124e-39	KDM5B	protein_coding	lysine (K)-specific demethylase 5B [Source:HGNC Symbol;Acc:18039]	1865	1472	676	667	43.2817	41.2804	17.0232	17.9585
ENSG00000185745	143.497	382.327	-1.3365	1.1057e-11	1.2622e-10	IFIT1	protein_coding	interferon-induced protein with tetratricopeptide repeats 1 [Source:HGNC Symbol;Acc:5407]	456	308	141	152	10.5916	8.6449	3.55375	4.09602
ENSG00000065485	367.122	947.524	-1.3356	1.3809e-25	3.6783e-24	PDIA5	protein_coding	protein disulfide isomerase family A, member 5 [Source:HGNC Symbol;Acc:24811]	978	890	387	364	49.5454	54.4835	21.2738	21.3937
ENSG00000253929	0	15.6529	-1.3348	0.00097691	0.0036019	RP11-382A18.2	lincRNA	-	17	14	0	0	3.16572	3.15038	0	0
ENSG00000047936	469.993	1208.81	-1.3348	1.8507e-29	5.8369e-28	ROS1	protein_coding	c-ros oncogene 1 , receptor tyrosine kinase [Source:HGNC Symbol;Acc:10261]	1259	1126	525	438	13.1306	14.1909	5.94139	5.29973
ENSG00000248690	0	16.1176	-1.3345	0.00097422	0.0035951	HAS2-AS1	antisense	HAS2 antisense RNA 1 [Source:HGNC Symbol;Acc:34340]	12	19	0	0	0.761506	1.45699	0	0
ENSG00000259485	0	16.1176	-1.3345	0.00097422	0.0035951	CTD-2147F2.1	lincRNA	-	12	19	0	0	1.27819	2.44556	0	0
ENSG00000119801	391.06	1008	-1.3341	8.1406e-25	2.1108e-23	YPEL5	protein_coding	yippee-like 5 (Drosophila) [Source:HGNC Symbol;Acc:18329]	1057	933	375	423	38.831	41.4187	14.9487	18.0287
ENSG00000093134	0	15.8371	-1.3327	0.00098826	0.0036397	VNN3	protein_coding	vanin 3 [Source:HGNC Symbol;Acc:16431]	21	11	0	0	0.955411	0.604748	0	0
ENSG00000173868	21.5802	71.7813	-1.3318	0.00020323	0.00087058	PHOSPHO1	protein_coding	phosphatase, orphan 1 [Source:HGNC Symbol;Acc:16815]	77	65	20	24	3.46234	3.53185	0.975837	1.25202
ENSG00000164897	305.157	788.018	-1.3316	3.494e-22	7.9227e-21	TMUB1	protein_coding	transmembrane and ubiquitin-like domain containing 1 [Source:HGNC Symbol;Acc:21709]	852	708	336	289	43.6536	43.8354	18.6805	17.179
ENSG00000161958	1.957	20.8401	-1.3307	0.0017067	0.0059596	FGF11	protein_coding	fibroblast growth factor 11 [Source:HGNC Symbol;Acc:3667]	21	20	2	2	0.492433	0.56672	0.0508893	0.0544099
ENSG00000085982	1152.91	2921.73	-1.3292	7.3507e-62	7.0216e-60	USP40	protein_coding	ubiquitin specific peptidase 40 [Source:HGNC Symbol;Acc:20069]	3129	2650	1245	1115	105.479	107.948	45.5405	43.6068
ENSG00000253276	362.367	932.321	-1.3289	1.6821e-22	3.8993e-21	CCDC71L	protein_coding	coiled-coil domain containing 71-like [Source:HGNC Symbol;Acc:26685]	1010	836	339	400	12.8883	12.8912	4.69402	5.92183
ENSG00000115380	2080.09	5247.7	-1.3272	1.6732e-88	2.8377e-86	EFEMP1	protein_coding	EGF containing fibulin-like extracellular matrix protein 1 [Source:HGNC Symbol;Acc:3218]	5706	4688	2115	2136	284.003	281.962	114.228	123.343
ENSG00000232949	0.502538	17.0418	-1.3269	0.0012823	0.0046144	AC002480.4	lincRNA	-	20	14	0	1	1.93908	1.64023	0	0.112483
ENSG00000121570	0.502538	17.0418	-1.3269	0.0012823	0.0046144	DPPA4	protein_coding	developmental pluripotency associated 4 [Source:HGNC Symbol;Acc:19200]	20	14	0	1	0.806624	0.682307	0	0.0467908
ENSG00000069482	44.8782	130.598	-1.3249	6.6854e-06	3.7413e-05	GAL	protein_coding	galanin/GMAP prepropeptide [Source:HGNC Symbol;Acc:4114]	132	125	51	41	9.73833	11.1437	4.08272	3.50925
ENSG00000095321	67.6471	188.943	-1.3247	4.1317e-07	2.8021e-06	CRAT	protein_coding	carnitine O-acetyltransferase [Source:HGNC Symbol;Acc:2342]	216	160	83	56	10.2143	9.14295	4.25895	3.0723
ENSG00000130477	16.7143	59.4638	-1.3246	0.00048209	0.0019074	UNC13A	protein_coding	unc-13 homolog A (C. elegans) [Source:HGNC Symbol;Acc:23150]	60	57	14	20	0.600149	0.68896	0.151952	0.232091
ENSG00000107902	58.1013	164.408	-1.3238	1.2021e-06	7.6348e-06	LHPP	protein_coding	phospholysine phosphohistidine inorganic pyrophosphate phosphatase [Source:HGNC Symbol;Acc:30042]	157	165	64	55	10.3777	13.1794	4.59038	4.21776
ENSG00000232774	189.513	491.437	-1.318	1.8794e-14	2.6744e-13	RP11-47I22.3	protein_coding	Uncharacterized protein [Source:UniProtKB/TrEMBL;Acc:G3V2X1]	562	416	187	200	25.6985	22.9867	9.27859	10.6102
ENSG00000182704	633.801	1602.64	-1.3178	1.0768e-37	4.8501e-36	TSKU	protein_coding	tsukushi, small leucine rich proteoglycan [Source:HGNC Symbol;Acc:28850]	1663	1498	677	620	48.206	52.4724	21.2944	20.8507
ENSG00000198169	47.734	137.358	-1.3177	5.6017e-06	3.1719e-05	ZNF251	protein_coding	zinc finger protein 251 [Source:HGNC Symbol;Acc:13045]	143	128	57	41	5.08393	5.49901	2.19891	1.69109
ENSG00000074706	1.45447	19.2654	-1.3149	0.0017945	0.0062281	IPCEF1	protein_coding	interaction protein for cytohesin exchange factors 1 [Source:HGNC Symbol;Acc:21204]	20	18	2	1	0.710572	0.77279	0.077104	0.041219
ENSG00000112096	9596.92	23952.1	-1.3148	4.5371e-142	1.9845e-139	SOD2	protein_coding	superoxide dismutase 2, mitochondrial [Source:HGNC Symbol;Acc:11180]	26299	21185	9703	9907	1016.63	989.611	407.005	444.311
ENSG00000170801	476.999	1210.9	-1.3142	1.861e-25	4.9177e-24	HTRA3	protein_coding	HtrA serine peptidase 3 [Source:HGNC Symbol;Acc:30406]	1398	1014	545	433	33.0836	28.9971	13.995	11.8881
ENSG00000176641	47.4706	135.412	-1.3141	4.7925e-06	2.7466e-05	RNF152	protein_coding	ring finger protein 152 [Source:HGNC Symbol;Acc:26811]	146	122	48	49	2.81891	2.84642	1.00563	1.0976
ENSG00000198945	159.549	414.663	-1.3136	3.5306e-13	4.528e-12	L3MBTL3	protein_coding	l(3)mbt-like 3 (Drosophila) [Source:HGNC Symbol;Acc:23035]	449	372	161	165	9.30808	9.31896	3.62167	3.96842
ENSG00000173237	2.40639	22.3219	-1.3106	0.0020514	0.0070244	C11orf86	protein_coding	chromosome 11 open reading frame 86 [Source:HGNC Symbol;Acc:34442]	23	21	4	1	1.0464	1.15452	0.197469	0.0527826
ENSG00000114023	471.981	1189.7	-1.3098	6.9839e-30	2.228e-28	FAM162A	protein_coding	family with sequence similarity 162, member A [Source:HGNC Symbol;Acc:17865]	1333	1030	488	477	44.354	41.4144	17.6194	18.4137
ENSG00000115468	3.86086	26.6727	-1.3094	0.0021539	0.007321	EFHD1	protein_coding	EF-hand domain family, member D1 [Source:HGNC Symbol;Acc:29556]	36	18	6	2	1.43055	0.864341	0.258715	0.0922045
ENSG00000142156	2420.4	6029.25	-1.3094	6.4902e-97	1.2399e-94	COL6A1	protein_coding	collagen, type VI, alpha 1 [Source:HGNC Symbol;Acc:2211]	6502	5431	2603	2351	225.084	227.189	97.7778	94.4212
ENSG00000244242	11.7155	46.1274	-1.3089	0.0010826	0.0039572	IFITM10	protein_coding	interferon induced transmembrane protein 10 [Source:HGNC Symbol;Acc:40022]	42	48	13	11	0.960671	1.32671	0.322655	0.291903
ENSG00000117594	94.8084	252.482	-1.3086	4.6383e-09	4.0342e-08	HSD11B1	protein_coding	hydroxysteroid (11-beta) dehydrogenase 1 [Source:HGNC Symbol;Acc:5208]	280	221	101	93	10.7699	10.2721	4.21546	4.15009
ENSG00000211445	39.5098	115.403	-1.3078	2.097e-05	0.00010808	GPX3	protein_coding	glutathione peroxidase 3 (plasma) [Source:HGNC Symbol;Acc:4555]	134	96	45	36	9.71337	8.40906	3.53954	3.02752
ENSG00000134202	0	15.2829	-1.3077	0.0011851	0.0042953	GSTM3	protein_coding	glutathione S-transferase mu 3 (brain) [Source:HGNC Symbol;Acc:4635]	15	15	0	0	0.392848	0.474717	0	0
ENSG00000186081	0	15.2829	-1.3077	0.0011851	0.0042953	KRT5	protein_coding	keratin 5 [Source:HGNC Symbol;Acc:6442]	15	15	0	0	0.824061	0.995795	0	0
ENSG00000196406	18.565	62.9799	-1.3071	0.00043858	0.0017477	SPANXD	protein_coding	SPANX family, member D [Source:HGNC Symbol;Acc:14332]	76	50	20	18	6.01798	4.78429	1.71845	1.6536
ENSG00000151117	5.81786	31.0287	-1.3068	0.0020204	0.0069312	TMEM86A	protein_coding	transmembrane protein 86A [Source:HGNC Symbol;Acc:26890]	31	30	8	4	1.41514	1.65489	0.396274	0.211844
ENSG00000215033	2.90893	23.3391	-1.3067	0.0021736	0.0073818	AL603965.1	protein_coding	Protein LOC100996760 [Source:UniProtKB/TrEMBL;Acc:A6NF06]	30	17	4	2	0.822387	0.563138	0.118983	0.0636071
ENSG00000111077	485.279	1221.39	-1.3066	3.5555e-30	1.1565e-28	TENC1	protein_coding	tensin like C1 domain containing phosphatase (tensin 2) [Source:HGNC Symbol;Acc:19737]	1315	1102	536	458	31.2426	31.6384	13.8183	12.6243
ENSG00000125731	12.1648	46.8658	-1.3044	0.0010564	0.0038674	SH2D3A	protein_coding	SH2 domain containing 3A [Source:HGNC Symbol;Acc:16885]	52	41	15	10	1.81877	1.73288	0.569291	0.405783
ENSG00000132950	61.909	171.445	-1.3043	1.0434e-06	6.6801e-06	ZMYM5	protein_coding	zinc finger, MYM-type 5 [Source:HGNC Symbol;Acc:13029]	171	166	72	55	4.25361	4.98977	1.9434	1.58725
ENSG00000158966	3.41147	24.1738	-1.3029	0.0022662	0.0076572	CACHD1	protein_coding	cache domain containing 1 [Source:HGNC Symbol;Acc:29314]	27	21	4	3	0.331837	0.311883	0.0533446	0.0427763
ENSG00000178860	836.59	2084.72	-1.3024	9.3145e-48	5.8865e-46	MSC	protein_coding	musculin [Source:HGNC Symbol;Acc:7321]	2224	1898	875	836	126.825	130.791	54.1438	55.3093
ENSG00000182389	6.84951	33.0664	-1.301	0.0019353	0.0066639	CACNB4	protein_coding	calcium channel, voltage-dependent, beta 4 subunit [Source:HGNC Symbol;Acc:1404]	33	32	7	7	0.550545	0.645119	0.12672	0.135487
ENSG00000205213	753.814	1879.86	-1.3008	7.0057e-42	3.6849e-40	LGR4	protein_coding	leucine-rich repeat containing G protein-coupled receptor 4 [Source:HGNC Symbol;Acc:13299]	1952	1756	794	748	50.4377	54.829	22.262	22.4232
ENSG00000124098	426.939	1073.11	-1.3007	4.1168e-26	1.1181e-24	FAM210B	protein_coding	family with sequence similarity 210, member B [Source:HGNC Symbol;Acc:16102]	1158	966	481	394	34.1727	34.4476	15.4023	13.4892
ENSG00000137486	177.899	457.738	-1.2977	5.8411e-13	7.3717e-12	ARRB1	protein_coding	arrestin, beta 1 [Source:HGNC Symbol;Acc:711]	476	427	208	157	23.0958	25.036	10.9511	8.83784
ENSG00000155130	3688.6	9094.49	-1.2965	3.2197e-119	9.91e-117	MARCKS	protein_coding	myristoylated alanine-rich protein kinase C substrate [Source:HGNC Symbol;Acc:6759]	9983	8046	3840	3703	126.168	122.88	52.661	54.2953
ENSG00000143512	6.40012	32.0476	-1.2964	0.0021122	0.0071984	HHIPL2	protein_coding	HHIP-like 2 [Source:HGNC Symbol;Acc:25842]	32	31	5	8	1.48463	1.73796	0.251714	0.430604
ENSG00000163617	22.5321	72.0584	-1.296	0.00027385	0.0011402	KIAA1407	protein_coding	KIAA1407 [Source:HGNC Symbol;Acc:29272]	80	63	22	24	2.34288	2.22952	0.699121	0.81544
ENSG00000244731	10.3673	42.6991	-1.2955	0.0015198	0.0053803	C4A	protein_coding	complement component 4A (Rodgers blood group) [Source:HGNC Symbol;Acc:1323]	43	41	7	14	1.95467	2.25216	0.345281	0.738334
ENSG00000110080	227.008	577.765	-1.2932	8.6192e-15	1.2611e-13	ST3GAL4	protein_coding	ST3 beta-galactoside alpha-2,3-sialyltransferase 4 [Source:HGNC Symbol;Acc:10864]	638	508	270	196	26.6261	25.619	12.227	9.48994
ENSG00000133067	91.6603	242.666	-1.2926	1.918e-08	1.5604e-07	LGR6	protein_coding	leucine-rich repeat containing G protein-coupled receptor 6 [Source:HGNC Symbol;Acc:19719]	266	215	106	82	7.41224	7.23964	3.20511	2.65095
ENSG00000102934	16.1851	56.2196	-1.2913	0.0007201	0.0027489	PLLP	protein_coding	plasmolipin [Source:HGNC Symbol;Acc:18553]	65	47	15	18	4.00254	3.49728	1.00226	1.28592
ENSG00000010932	0.502538	16.4859	-1.2907	0.0016628	0.0058295	FMO1	protein_coding	flavin containing monooxygenase 1 [Source:HGNC Symbol;Acc:3769]	20	13	0	1	0.762761	0.599118	0	0.0442464
ENSG00000133112	12225.5	29977.6	-1.29	1.56e-159	8.6431e-157	TPT1	protein_coding	tumor protein, translationally-controlled 1 [Source:HGNC Symbol;Acc:12022]	32452	26900	12451	12535	1953.76	1957.01	813.396	875.535
ENSG00000139178	414.17	1031.05	-1.2894	6.5058e-27	1.8204e-25	C1RL	protein_coding	complement component 1, r subcomponent-like [Source:HGNC Symbol;Acc:21265]	1120	922	432	415	66.3928	66.0457	27.7879	28.5411
ENSG00000198417	0	15.0041	-1.289	0.001351	0.0048364	MT1F	protein_coding	metallothionein 1F [Source:HGNC Symbol;Acc:7398]	18	12	0	0	1.41288	1.13822	0	0
ENSG00000089127	13.5396	51.2183	-1.2889	0.001201	0.0043441	OAS1	protein_coding	2'-5'-oligoadenylate synthetase 1, 40/46kDa [Source:HGNC Symbol;Acc:8086]	59	43	20	8	3.04317	2.68012	1.11937	0.478724
ENSG00000119698	222.465	562.959	-1.288	3.6709e-15	5.5068e-14	PPP4R4	protein_coding	protein phosphatase 4, regulatory subunit 4 [Source:HGNC Symbol;Acc:23788]	576	533	214	240	26.1395	29.2289	10.538	12.6359
ENSG00000125246	2.96208	22.9708	-1.287	0.0025318	0.0084399	CLYBL	protein_coding	citrate lyase beta like [Source:HGNC Symbol;Acc:18355]	22	23	2	4	0.775001	0.97908	0.0764501	0.163478
ENSG00000108176	85.3399	226.555	-1.2866	6.1341e-08	4.6854e-07	DNAJC12	protein_coding	DnaJ (Hsp40) homolog, subfamily C, member 12 [Source:HGNC Symbol;Acc:28908]	230	216	98	77	15.9241	18.0714	7.36244	6.18497
ENSG00000134532	17.0574	59.1884	-1.2855	0.0007538	0.002867	SOX5	protein_coding	SRY (sex determining region Y)-box 5 [Source:HGNC Symbol;Acc:11201]	51	64	20	15	1.32095	2.00312	0.562101	0.450741
ENSG00000159403	680.16	1677.26	-1.2845	4.1578e-38	1.8933e-36	C1R	protein_coding	complement component 1, r subcomponent [Source:HGNC Symbol;Acc:1246]	1865	1464	729	663	109.474	103.845	46.4334	45.151
ENSG00000133619	69.2345	187.193	-1.2832	7.7143e-07	5.0302e-06	KRBA1	protein_coding	KRAB-A domain containing 1 [Source:HGNC Symbol;Acc:22228]	181	186	80	62	4.20595	5.22287	2.01718	1.67146
ENSG00000185112	193.768	490.059	-1.283	2.8939e-14	4.0488e-13	FAM43A	protein_coding	family with sequence similarity 43, member A [Source:HGNC Symbol;Acc:26888]	523	446	216	181	8.99198	9.26615	4.02973	3.61037
ENSG00000162426	10.8698	43.718	-1.2824	0.0016551	0.0058035	SLC45A1	protein_coding	solute carrier family 45, member 1 [Source:HGNC Symbol;Acc:17939]	44	42	7	15	1.17283	1.35283	0.202465	0.463867
ENSG00000259250	4.46969	27.6021	-1.2791	0.0027128	0.0089926	RP11-50C13.1	antisense	-	26	28	2	7	2.59057	3.37125	0.216233	0.809171
ENSG00000186907	208.923	524.419	-1.2784	2.8737e-15	4.354e-14	RTN4RL2	protein_coding	reticulon 4 receptor-like 2 [Source:HGNC Symbol;Acc:23053]	566	472	213	214	26.7887	26.9953	10.9392	11.7509
ENSG00000010030	1.93043	20.0984	-1.2783	0.002505	0.0083588	ETV7	protein_coding	ets variant 7 [Source:HGNC Symbol;Acc:18160]	23	17	3	1	0.74376	0.664301	0.105268	0.0375167
ENSG00000187672	11.2926	43.6233	-1.2783	0.0015246	0.0053948	ERC2	protein_coding	ELKS/RAB6-interacting/CAST family member 2 [Source:HGNC Symbol;Acc:31922]	51	36	10	13	1.54382	1.31686	0.32847	0.456552
ENSG00000188089	0.502538	16.2088	-1.2767	0.0018401	0.0063706	PLA2G4E	protein_coding	phospholipase A2, group IVE [Source:HGNC Symbol;Acc:24791]	17	15	0	1	0.289608	0.308791	0	0.0197643
ENSG00000196562	724.454	1776.66	-1.2758	5.8733e-38	2.6672e-36	SULF2	protein_coding	sulfatase 2 [Source:HGNC Symbol;Acc:20392]	1896	1617	802	682	53.4119	55.0453	24.5156	22.2897
ENSG00000071575	1105.74	2702.39	-1.2755	2.3027e-45	1.3152e-43	TRIB2	protein_coding	tribbles homolog 2 (Drosophila) [Source:HGNC Symbol;Acc:30809]	2965	2392	1072	1185	74.4745	72.6031	29.2178	34.532
ENSG00000063127	19.4903	63.7234	-1.2754	0.00054601	0.0021384	SLC6A16	protein_coding	solute carrier family 6, member 16 [Source:HGNC Symbol;Acc:13622]	68	58	23	17	2.88018	2.96859	1.05708	0.835373
ENSG00000162433	64.6874	173.571	-1.2752	1.0742e-06	6.8669e-06	AK4	protein_coding	adenylate kinase 4 [Source:HGNC Symbol;Acc:363]	190	154	62	70	3.1905	3.12491	1.12971	1.36371
ENSG00000175699	3.49119	25.9361	-1.275	0.0027819	0.0092002	LINC00521	processed_transcript	long intergenic non-protein coding RNA 521 [Source:HGNC Symbol;Acc:19860]	20	30	1	6	0.840521	1.52353	0.0456024	0.292543
ENSG00000165895	4.3634	26.3044	-1.2747	0.0027947	0.0092329	ARHGAP42	protein_coding	Rho GTPase activating protein 42 [Source:HGNC Symbol;Acc:26545]	28	24	6	3	0.814707	0.843851	0.189437	0.101271
ENSG00000108387	8.30398	37.2296	-1.2747	0.0022849	0.0077066	2018-09-04	protein_coding	septin 4 [Source:HGNC Symbol;Acc:9165]	54	22	9	8	2.17626	1.0714	0.393576	0.374047
ENSG00000171045	14.0953	51.2217	-1.2745	0.0011942	0.0043224	TSNARE1	protein_coding	t-SNARE domain containing 1 [Source:HGNC Symbol;Acc:26437]	47	53	18	11	1.99855	2.72336	0.830538	0.542663
ENSG00000150636	226.297	565.074	-1.2743	5.2462e-16	8.3602e-15	CCDC102B	protein_coding	coiled-coil domain containing 102B [Source:HGNC Symbol;Acc:26295]	631	491	240	223	27.8173	26.1564	11.4806	11.4054
ENSG00000089472	4.81279	28.8068	-1.2726	0.0028377	0.0093528	HEPH	protein_coding	hephaestin [Source:HGNC Symbol;Acc:4866]	25	31	8	2	0.418502	0.62709	0.145317	0.0388425
ENSG00000129151	0	14.727	-1.2722	0.0015202	0.0053806	BBOX1	protein_coding	butyrobetaine (gamma), 2-oxoglutarate dioxygenase (gamma-butyrobetaine hydroxylase) 1 [Source:HGNC Symbol;Acc:964]	15	14	0	0	0.706851	0.797215	0	0
ENSG00000265096	8.85967	37.5119	-1.2713	0.0021199	0.0072172	AC073624.1	protein_coding	Uncharacterized protein [Source:UniProtKB/TrEMBL;Acc:J3KS61]	39	35	7	11	2.90903	3.15473	0.566565	0.951909
ENSG00000137868	258.269	641.218	-1.2693	2.2425e-17	3.913e-16	STRA6	protein_coding	stimulated by retinoic acid 6 [Source:HGNC Symbol;Acc:30650]	679	588	285	244	21.098	22.078	9.60916	8.79593
ENSG00000166927	0.951928	18.5219	-1.2693	0.002173	0.0073813	MS4A7	protein_coding	membrane-spanning 4-domains, subfamily A, member 7 [Source:HGNC Symbol;Acc:13378]	28	10	2	0	1.52122	0.656517	0.117906	0
ENSG00000104888	4.44312	26.4886	-1.2692	0.0029188	0.0095875	SLC17A7	protein_coding	solute carrier family 17 (sodium-dependent inorganic phosphate cotransporter), member 7 [Source:HGNC Symbol;Acc:16704]	32	21	3	6	0.809419	0.64188	0.0823406	0.176074
ENSG00000006283	18.9081	63.1658	-1.268	0.00077125	0.0029247	CACNA1G	protein_coding	calcium channel, voltage-dependent, T type, alpha 1G subunit [Source:HGNC Symbol;Acc:1394]	74	52	26	13	0.607795	0.516107	0.231722	0.123877
ENSG00000213694	776.774	1894.87	-1.2679	2.6396e-36	1.1425e-34	S1PR3	protein_coding	sphingosine-1-phosphate receptor 3 [Source:HGNC Symbol;Acc:3167]	1928	1803	781	806	16.3812	18.5116	7.20042	7.94498
ENSG00000147488	9.14961	40.2914	-1.2675	0.0023472	0.0078863	ST18	protein_coding	suppression of tumorigenicity 18 (breast carcinoma) (zinc finger protein) [Source:HGNC Symbol;Acc:18695]	39	40	15	4	1.36673	1.69391	0.570399	0.162629
ENSG00000248323	139.979	353.253	-1.2641	5.8436e-11	6.2142e-10	RP11-213H15.3	processed_transcript	-	392	309	141	145	16.1475	15.3811	6.30241	6.92958
ENSG00000116785	4.46969	27.0445	-1.2613	0.0031138	0.010164	CFHR3	protein_coding	complement factor H-related 3 [Source:HGNC Symbol;Acc:16980]	32	22	2	7	1.2935	1.0746	0.0877231	0.328271
ENSG00000256043	97.1374	250.441	-1.2597	5.1245e-08	3.9524e-07	CTSO	protein_coding	cathepsin O [Source:HGNC Symbol;Acc:2542]	290	209	89	109	5.30162	4.61709	1.76551	2.31184
ENSG00000139318	622.115	1508.7	-1.2596	3.9974e-35	1.6446e-33	DUSP6	protein_coding	dual specificity phosphatase 6 [Source:HGNC Symbol;Acc:3072]	1621	1364	644	628	50.8655	51.7209	21.9278	22.8623
ENSG00000109472	430.145	1047.99	-1.2586	1.7585e-24	4.4486e-23	CPE	protein_coding	carboxypeptidase E [Source:HGNC Symbol;Acc:2303]	1189	895	436	443	69.4914	63.2096	27.6506	30.0382
ENSG00000121691	1136.6	2739.56	-1.2572	1.5089e-52	1.1452e-50	CAT	protein_coding	catalase [Source:HGNC Symbol;Acc:1516]	2894	2518	1159	1164	156.599	164.648	68.0524	73.0742
ENSG00000186973	3.91401	24.6385	-1.2553	0.0032656	0.010597	FAM183A	protein_coding	family with sequence similarity 183, member A [Source:HGNC Symbol;Acc:34347]	22	26	4	4	2.53862	3.62543	0.500846	0.535495
ENSG00000087237	15.3129	53.8119	-1.2552	0.0013799	0.00493	CETP	protein_coding	cholesteryl ester transfer protein, plasma [Source:HGNC Symbol;Acc:1869]	61	46	10	21	2.21385	2.01738	0.393811	0.884215
ENSG00000100003	105.147	270.261	-1.2552	4.1459e-08	3.2489e-07	SEC14L2	protein_coding	SEC14-like 2 (S. cerevisiae) [Source:HGNC Symbol;Acc:10699]	316	223	128	88	13.533	11.5404	5.9482	4.37229
ENSG00000105851	2.51269	23.062	-1.2531	0.0030791	0.010058	PIK3CG	protein_coding	phosphatidylinositol-4,5-bisphosphate 3-kinase, catalytic subunit gamma [Source:HGNC Symbol;Acc:8978]	27	19	0	5	0.46525	0.395628	0	0.0999568
ENSG00000270101	22.665	71.962	-1.2529	0.00067403	0.0025879	RP11-24B19.3	sense_intronic	-	93	52	17	29	6.39786	4.32281	1.26902	2.31457
ENSG00000182492	23.6146	77.7103	-1.2523	0.00088035	0.0032889	BGN	protein_coding	biglycan [Source:HGNC Symbol;Acc:1044]	79	74	38	11	2.45612	2.78012	1.28196	0.396766
ENSG00000113083	521.597	1260.1	-1.2501	6.5182e-28	1.9141e-26	LOX	protein_coding	lysyl oxidase [Source:HGNC Symbol;Acc:6664]	1371	1125	512	553	36.1871	35.8822	14.6641	16.9341
ENSG00000086717	10.8698	42.7886	-1.2501	0.0022788	0.0076874	PPEF1	protein_coding	protein phosphatase, EF-hand calcium binding domain 1 [Source:HGNC Symbol;Acc:9243]	54	32	7	15	1.82262	1.30516	0.256371	0.587371
ENSG00000134955	186.519	464.129	-1.2493	8.8564e-12	1.0138e-10	SLC37A2	protein_coding	solute carrier family 37 (glycerol-3-phosphate transporter), member 2 [Source:HGNC Symbol;Acc:20644]	479	436	224	159	11.1355	12.2481	5.65053	4.28834
ENSG00000187764	61.7253	163.107	-1.2475	2.9145e-06	1.7295e-05	SEMA4D	protein_coding	sema domain, immunoglobulin domain (Ig), transmembrane domain (TM) and short cytoplasmic domain, (semaphorin) 4D [Source:HGNC Symbol;Acc:10732]	171	151	60	66	4.01504	4.28432	1.52867	1.79787
ENSG00000117595	1.45447	18.0606	-1.2474	0.0029262	0.0096061	IRF6	protein_coding	interferon regulatory factor 6 [Source:HGNC Symbol;Acc:6121]	21	15	2	1	0.613012	0.529117	0.0633503	0.0338665
ENSG00000125999	0.502538	15.7458	-1.2466	0.0022697	0.0076676	BPIFB1	protein_coding	BPI fold containing family B, member 1 [Source:HGNC Symbol;Acc:16108]	16	15	0	1	0.600455	0.680241	0	0.0435392
ENSG00000135298	4.83936	28.1597	-1.2461	0.0034793	0.01122	BAI3	protein_coding	brain-specific angiogenesis inhibitor 3 [Source:HGNC Symbol;Acc:945]	20	34	7	3	0.45229	0.929131	0.171773	0.0787097
ENSG00000167100	5.31533	28.7139	-1.2454	0.0034331	0.01108	SAMD14	protein_coding	sterile alpha motif domain containing 14 [Source:HGNC Symbol;Acc:27312]	26	30	8	3	0.810207	1.12968	0.270509	0.108459
ENSG00000156453	29.3019	85.3965	-1.2442	0.00021055	0.00089755	PCDH1	protein_coding	protocadherin 1 [Source:HGNC Symbol;Acc:8655]	92	77	32	28	1.79556	1.81599	0.67769	0.634002
ENSG00000117868	1121.54	2677.18	-1.2439	2.6928e-51	1.9291e-49	ESYT2	protein_coding	extended synaptotagmin-like protein 2 [Source:HGNC Symbol;Acc:22211]	2979	2335	1177	1117	64.2991	60.902	27.5664	27.971
ENSG00000178342	5.3419	28.2475	-1.2427	0.0034904	0.011254	KCNG2	protein_coding	potassium voltage-gated channel, subfamily G, member 2 [Source:HGNC Symbol;Acc:6249]	37	20	7	4	1.35927	0.887861	0.279043	0.170484
ENSG00000154310	339.328	820.812	-1.2424	7.1228e-21	1.5043e-19	TNIK	protein_coding	TRAF2 and NCK interacting kinase [Source:HGNC Symbol;Acc:30765]	864	757	355	339	14.6542	15.5151	6.5335	6.67065
ENSG00000170425	111.126	280.742	-1.2421	1.1422e-08	9.5158e-08	ADORA2B	protein_coding	adenosine A2b receptor [Source:HGNC Symbol;Acc:264]	275	276	111	116	8.22767	9.97848	3.6036	4.02645
ENSG00000136943	5.79129	30.1923	-1.2414	0.0035055	0.011296	CTSL2	protein_coding	cathepsin L2 [Source:HGNC Symbol;Acc:2538]	40	21	9	3	2.04172	1.29529	0.49848	0.177655
ENSG00000166387	150.027	371.41	-1.2412	3.2816e-11	3.5756e-10	PPFIBP2	protein_coding	PTPRF interacting protein, binding protein 2 (liprin beta 2) [Source:HGNC Symbol;Acc:9250]	400	335	160	147	19.2869	19.5191	8.37129	8.2232
ENSG00000162512	890.664	2128.23	-1.2408	1.4857e-39	7.1368e-38	SDC3	protein_coding	syndecan 3 [Source:HGNC Symbol;Acc:10660]	2330	1888	996	829	56.4504	55.2744	26.1842	23.3016
ENSG00000015475	794.032	1898.45	-1.2401	7.6432e-37	3.3608e-35	BID	protein_coding	BH3 interacting domain death agonist [Source:HGNC Symbol;Acc:1050]	2039	1717	888	739	73.3598	74.6486	34.6675	30.8465
ENSG00000148965	0	14.4499	-1.2398	0.0018943	0.0065362	SAA4	protein_coding	serum amyloid A4, constitutive [Source:HGNC Symbol;Acc:10516]	12	16	0	0	0.891391	1.43621	0	0
ENSG00000123405	32.7931	93.7349	-1.2394	0.00015387	0.00067443	NFE2	protein_coding	nuclear factor (erythroid-derived 2), 45kDa [Source:HGNC Symbol;Acc:7780]	92	92	33	34	3.11103	3.75937	1.21088	1.33388
ENSG00000128340	780.093	1865.1	-1.2392	1.8249e-34	7.2737e-33	RAC2	protein_coding	ras-related C3 botulinum toxin substrate 2 (rho family, small GTP binding protein Rac2) [Source:HGNC Symbol;Acc:9802]	2051	1647	883	716	135.405	131.393	63.2554	54.8405
ENSG00000169220	48.8962	136.434	-1.2356	8.3059e-05	0.00038401	RGS14	protein_coding	regulator of G-protein signaling 14 [Source:HGNC Symbol;Acc:9996]	135	133	70	31	7.72295	9.19416	4.34527	2.05746
ENSG00000205593	13.699	47.7934	-1.2354	0.0017065	0.0059596	DENND6B	protein_coding	DENN/MADD domain containing 6B [Source:HGNC Symbol;Acc:32690]	48	46	14	14	1.87974	2.17684	0.594914	0.636071
ENSG00000253706	1.00508	17.6889	-1.2343	0.0028236	0.0093167	RP11-758M4.4	processed_transcript	-	25	11	0	2	1.00304	0.53331	0	0.093095
ENSG00000134871	966.753	2294.78	-1.2337	6.3455e-46	3.7268e-44	COL4A2	protein_coding	collagen, type IV, alpha 2 [Source:HGNC Symbol;Acc:2203]	2464	2076	1045	934	111.165	113.179	51.1579	48.8871
ENSG00000172889	11.2926	42.0486	-1.2328	0.0023362	0.0078587	EGFL7	protein_coding	EGF-like-domain, multiple 7 [Source:HGNC Symbol;Acc:20594]	50	34	10	13	2.27671	1.8708	0.49409	0.686752
ENSG00000043355	56.3545	151.06	-1.2314	2.1925e-05	0.00011251	ZIC2	protein_coding	Zic family member 2 [Source:HGNC Symbol;Acc:12873]	181	121	73	43	10.8486	8.76381	4.74776	2.9901
ENSG00000164619	37.1299	102.901	-1.23	9.2555e-05	0.00042461	BMPER	protein_coding	BMP binding endothelial regulator [Source:HGNC Symbol;Acc:24154]	113	91	40	36	4.044	3.93536	1.55332	1.4947
ENSG00000227195	0.951928	17.0418	-1.2292	0.0029338	0.0096273	RP3-410C9.1	processed_transcript	-	20	14	2	0	1.52984	1.29406	0.166003	0
ENSG00000129048	78.7827	201.176	-1.2287	5.2724e-07	3.5279e-06	CCRL1	protein_coding	chemokine (C-C motif) receptor-like 1 [Source:HGNC Symbol;Acc:1611]	204	192	80	81	9.42404	10.7181	4.0102	4.34122
ENSG00000134709	1.45447	18.1553	-1.2283	0.0033213	0.010769	HOOK1	protein_coding	hook homolog 1 (Drosophila) [Source:HGNC Symbol;Acc:19884]	14	21	2	1	0.423794	0.768169	0.065694	0.0351194
ENSG00000271605	18.3282	62.9765	-1.2278	0.0018443	0.0063837	MILR1	protein_coding	mast cell immunoglobulin-like receptor 1 [Source:HGNC Symbol;Acc:27570]	88	40	10	27	7.80345	4.28623	0.962217	2.77772
ENSG00000119927	589.111	1396.9	-1.2267	4.2889e-31	1.4668e-29	GPAM	protein_coding	glycerol-3-phosphate acyltransferase, mitochondrial [Source:HGNC Symbol;Acc:24865]	1526	1242	600	604	21.3994	21.0465	9.12995	9.82664
ENSG00000163517	64.5811	166.716	-1.2237	3.1279e-06	1.8495e-05	HDAC11	protein_coding	histone deacetylase 11 [Source:HGNC Symbol;Acc:19086]	186	145	66	66	9.6121	9.05491	3.70099	3.95703
ENSG00000105516	116.519	289.16	-1.2229	9.7328e-09	8.1825e-08	DBP	protein_coding	D site of albumin promoter (albumin D-box) binding protein [Source:HGNC Symbol;Acc:2697]	322	252	135	104	7.98032	7.54702	3.6305	2.99032
ENSG00000115604	89.2297	225.724	-1.2224	3.3491e-07	2.3097e-06	IL18R1	protein_coding	interleukin 18 receptor 1 [Source:HGNC Symbol;Acc:5988]	221	222	84	98	5.80485	7.04632	2.39412	2.98638
ENSG00000106236	17.0308	55.5708	-1.2223	0.0014006	0.0049978	NPTX2	protein_coding	neuronal pentraxin II [Source:HGNC Symbol;Acc:7953]	66	45	21	14	2.01142	1.65722	0.694458	0.495001
ENSG00000198573	5.81786	28.7122	-1.2214	0.0040156	0.012754	SPANXC	protein_coding	SPANX family, member C [Source:HGNC Symbol;Acc:14331]	32	25	8	4	4.4654	4.21562	1.21135	0.647576
ENSG00000260336	243.804	585.356	-1.2212	2.8136e-15	4.2747e-14	RP11-395B7.7	sense_overlapping	-	658	505	262	237	9.06255	8.40479	3.91557	3.78698
ENSG00000254337	0.978502	16.3929	-1.221	0.0031586	0.010292	RP11-865I6.2	lincRNA	-	21	12	1	1	2.20208	1.52057	0.113785	0.121656
ENSG00000102879	28.0842	83.1746	-1.2131	0.00060838	0.0023593	CORO1A	protein_coding	coronin, actin binding protein, 1A [Source:HGNC Symbol;Acc:2252]	86	78	40	18	4.04555	4.43389	2.04178	0.982363
ENSG00000143466	211.83	508.018	-1.2121	3.5492e-13	4.5482e-12	IKBKE	protein_coding	inhibitor of kappa light polypeptide gene enhancer in B-cells, kinase epsilon [Source:HGNC Symbol;Acc:14552]	575	435	236	198	19.8542	18.1503	8.84231	7.93177
ENSG00000204789	28.0866	81.8787	-1.2095	0.00056097	0.0021887	ZNF204P	pseudogene	zinc finger protein 204, pseudogene [Source:HGNC Symbol;Acc:12995]	82	79	21	36	1.38297	1.61005	0.384316	0.704405
ENSG00000136869	315.474	747.277	-1.2087	6.7027e-18	1.1979e-16	TLR4	protein_coding	toll-like receptor 4 [Source:HGNC Symbol;Acc:11850]	764	708	326	319	13.7163	15.3599	6.35083	6.64438
ENSG00000006118	2370.62	5509	-1.2081	1.3137e-68	1.4754e-66	TMEM132A	protein_coding	transmembrane protein 132A [Source:HGNC Symbol;Acc:31092]	5927	4974	2623	2233	227.976	231.191	109.477	99.6467
ENSG00000130529	111.866	274.433	-1.208	1.5356e-08	1.261e-07	TRPM4	protein_coding	transient receptor potential cation channel, subfamily M, member 4 [Source:HGNC Symbol;Acc:17993]	307	238	121	108	7.30999	6.84804	3.12632	2.98347
ENSG00000166578	74.499	187.742	-1.2058	1.6656e-06	1.0284e-05	IQCD	protein_coding	IQ motif containing D [Source:HGNC Symbol;Acc:25168]	205	167	71	81	6.75867	6.65327	2.54001	3.09822
ENSG00000132561	6.4267	30.2852	-1.2046	0.0045155	0.01413	MATN2	protein_coding	matrilin 2 [Source:HGNC Symbol;Acc:6908]	39	22	4	9	1.28658	0.877014	0.143186	0.344457
ENSG00000131094	40.3554	109.944	-1.2039	0.00013794	0.00060913	C1QL1	protein_coding	complement component 1, q subcomponent-like 1 [Source:HGNC Symbol;Acc:24182]	109	107	51	32	4.54546	5.39196	2.30776	1.54818
[truncated: 5,487 more rows]

## Sheet: Table S6
Supplementary Table 6. Antibody information
Antibody	Manufacture
APC	Abcam; Ali 12-28; ab58
alpha smooth muscle Actin	Abcam; Ab5694
[truncated: 21 more rows]
